# Supplementary material
Source: PubMed Central journal article supplement (PMC3413634)
Supplement: NIHMS389142-supplement-1_si_001.pdf [file NIHMS389142-supplement-1_si_001.pdf]

## Supporting Information

# ‘Highly Stereoselective C-C Bond Formation by Rhodium Catalyzed Tandem Ylide Formation/[2,3]-Sigmatropic Rearrangement Between Donor/Acceptor Carbenoids and Chiral Allylic Alcohols’

*Zhanjie Li, Brendan T. Parr and Huw M. L. Davies\**

Department of Chemistry, Emory University, 440 Atwood Hall, 1515 Dickey Drive, Atlanta, GA 30322.

\* To whom correspondence should be addressed: [hmdavie@emory.edu](mailto:hmdavie@emory.edu)

### Table of Contents

|                                               |     |
|-----------------------------------------------|-----|
| 1. Experimental Section .....                 | S2  |
| 1.1 General Considerations .....              | S2  |
| 1.2 General Procedures .....                  | S3  |
| 2. Procedures and Characterization Data ..... | S5  |
| 3. Stereochemical Rationale.....              | S30 |
| 4. References.....                            | S32 |
| 5. Crude NMR Data .....                       | S33 |
| 6. NMR Data for New Compounds .....           | S54 |
| 7. HPLC Traces for Compound <b>8b</b> .....   | S97 |
| 8. X-Ray Crystallography Data.....            | S98 |

## 1. Experimental Section

### 1.1 General Considerations

All reactions were conducted in oven-dried glassware under an inert atmosphere of dry argon. All chemicals were purchased from either Sigma-Aldrich, TCI America or Acros and were used as received. Pentane, tetrahydrofuran and diethyl ether were obtained from a Grubbs-type solvent purification system.  $^1\text{H}$  NMR spectra were recorded at either 400 MHz on an INOVA-400 spectrometer or at 600 MHz on an INOVA-600 spectrometer.  $^{13}\text{C}$  NMR spectra were recorded at 100 MHz on an INOVA-400 spectrometer. NMR spectra were recorded in deuterated chloroform ( $\text{CDCl}_3$ ) solutions, with residual chloroform ( $\delta$  7.27 ppm for  $^1\text{H}$  NMR and  $\delta$  77.23 ppm for  $^{13}\text{C}$  NMR) or tetramethylsilane ( $\delta$  0.00 ppm for  $^1\text{H}$  NMR) taken as the internal standard, and were reported in parts per million (ppm). Abbreviations for signal coupling are as follows: s, singlet; d, doublet; t, triplet; q, quartet; m, multiplet. Coupling constants were taken from the spectra directly and are uncorrected. IR spectra were collected on a Nicolet iS10 FT-IR spectrometer as neat films. Mass spectra determinations were carried out on a Thermo Finnigan LTQ-FTMS spectrometer with electrospray (ESI) or atmospheric pressure chemical (APCI) ionization. Optical rotations were measured on JASCO P-2000 polarimeter. Gas chromatography (GC) analysis was performed on an Agilent 7890A; column conditions: 30 °C for 1 min, then increasing to 180 °C at a rate of 5 °C/min, then 180 °C for 5 min. Analytical thin layer chromatography (TLC) was performed on silica gel plates using UV light or stained with 10% vanillin/1% sulfuric acid/ethanol solution. Flash column chromatography was performed with silica gel 60 A (230-400 mesh) according to the literature procedure.<sup>1</sup> Substrates **2** and **4c**<sup>2</sup>,  $\text{Rh}_2(\text{S-DOSP})_4$  and  $\text{Rh}_2(\text{R-DOSP})_4$ <sup>3</sup>, **4a-b**<sup>4</sup>, **4d-e**<sup>5</sup> and **4f**<sup>6</sup> were all synthesized according to published procedures.

## 1.2 General Procedures

### 1.2.1 Enzymatic Kinetic Resolution of Secondary Allylic Alcohols<sup>7</sup>

To a vigorously stirred solution of racemic allylic alcohol (1.0 equiv) and vinyl acetate (2.7 equiv) in hexanes (100 mL) was added Amano AK (30 wt %) and molecular sieves (50 wt %). The mixture was stirred at room temperature with periodic analysis of aliquots by chiral GC or HPLC. After the enantiomeric excess of the alcohol exceeded 98%, the mixture was filtered and concentrated *in vacuo*. Flash chromatography of the crude material on silica gel afforded the enantiomerically pure (*S*)-alcohol.

### 1.2.2 Sharpless Enantioselective Epoxidation/Kinetic Resolution of Secondary Alcohols<sup>8</sup>

To a solution of racemic allylic alcohol (10.0 mmol, 1.0 equiv) and *D*-(-)-DIPT (2.55 mL, 12.0 mmol, 1.2 equiv) in dichloromethane (100 mL) at -20 °C was slowly added Ti(*Oi*-Pr)<sub>4</sub> (3.00 mL, 10.0 mmol, 1.0 equiv). The solution was stirred for 30 min prior to the slow addition of TBHP (5.5 M in decane, 1.1 mL, 6.0 mmol, 0.60 equiv). The reaction mixture was then stirred at -20 °C for 15 h before quenching with cold aqueous citric acid (11 g)/FeSO<sub>4</sub> (33 g) solution (100 mL). The mixture was stirred vigorously at room temperature until two layers became apparent. The organic layer was set aside and the aqueous layer was extracted with dichloromethane. The combined organic fractions were concentrated *in vacuo*, and the crude residue was dissolved in diethyl ether (100 mL). To the ether solution was added aqueous NaOH (30 g)/NaCl (5 g) solution (90 mL) at 0 °C. The mixture was then stirred at 0 °C for 1h before addition of H<sub>2</sub>O (100 mL). The layers were separated and the organic was dried over MgSO<sub>4</sub> and concentrated *in vacuo*. Flash chromatography of the crude material on silica gel afforded the enantiomerically pure (*S*)-alcohol.

### 1.2.3 Rhodium(II)-Catalyzed [2,3]-Sigmatropic Rearrangement of Allylic Alcohols

An oven-dried, 25 mL round-bottomed flask, equipped with a stir bar, was capped with a rubber septum and placed under a dry argon atmosphere. The reaction vessel was charged with  $\text{Rh}_2(\text{S-DOSP})_4$  (10 mg, 0.0050 mmol, 0.010 equiv) and the allyl alcohol (0.5 mmol, 1.0 equiv) in pentane (1.0 mL). The solution was cooled to 0 °C in an ice bath before adding a pentane solution (9 mL) of the diazo compound (1.0 mmol, 2.0 equiv) drop-wise over 1.5 h. Following addition, the reaction was stirred at 0 °C for 1 h before warming to room temperature and concentrating *in vacuo*. The product was purified by flash chromatography.

## 2. Procedures and Characterization Data

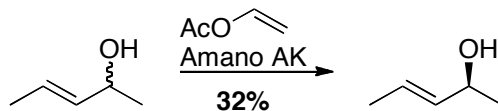

**(*S,E*)-pent-3-en-2-ol ((*S,E*)-1).** Prepared by procedure 1.2.1 with *racemic* (*E*)-1 (3.0 g, 35 mmol, 1.0 equiv), vinyl acetate (8.7 mL, 94 mmol, 2.7 equiv) and Amano AK enzyme (1.0 g, 30 wt %). The reaction mixture was stirred for 8 h at ambient temperature and filtered. After concentration of the filtrate, the residue was purified by flash chromatography (pentane/diethyl ether, 5:1 → 2:1) to afford the title compound as a colorless oil (0.95 g, 32% yield).  $[\alpha]_D^{20}$  -14.5° (*c* 3.0, CHCl<sub>3</sub>). <sup>1</sup>H NMR (400 MHz, CDCl<sub>3</sub>): δ 5.66 (dq, *J* = 15.2, 6.4 Hz, 1H), 5.53 (dd, *J* = 15.2, 6.4 Hz, 1H), 4.26 (m, 1H), 1.69 (d, *J* = 6.4 Hz, 3H), 1.29 (d, *J* = 6.4 Hz, 3H). Chiral Capillary GC analysis: 99% ee, (CHIRALDEX BP-M). *t*<sub>R</sub> = 5.10 min (minor), 5.27 min (major).

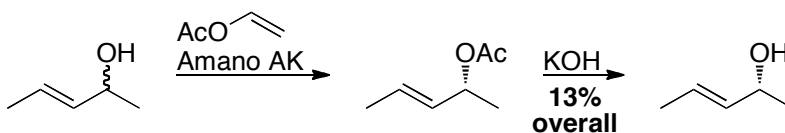

**(*R,E*)-pent-3-en-2-ol ((*R,E*)-1).** Prepared by procedure 1.2.1 with *racemic* (*E*)-1 (3.0 g, 35 mmol, 1.0 equiv), vinyl acetate (8.7 mL, 94 mmol, 2.7 equiv) and Amano AK enzyme (1.0 g, 30 wt %). The reaction mixture was stirred for 2 h at ambient temperature and filtered. After concentration of the filtrate, the residue was purified by flash chromatography (pentane/diethyl ether, 5:1 → 2:1) to afford (*R,E*)-pent-3-en-2-yl acetate. The acetate was dissolved with potassium hydroxide solution (3.9 g KOH in 10 mL EtOH/H<sub>2</sub>O, 7:3) and heated to reflux for 3.5 h. Upon cooling to room temperature, the solution was carefully neutralized with aqueous HCl and extracted with diethyl ether. The combined organic fractions were dried over MgSO<sub>4</sub>, filtered and concentrated *in vacuo* to give the title compound as a colorless oil (0.19 g, 13%

yield). Spectral data was consistent with that for (*S,E*)-**1**. Chiral Capillary GC analysis: 97% ee, (CHIRALDEX BP-M).  $t_R$  = 5.10 min (major), 5.27 min (minor).

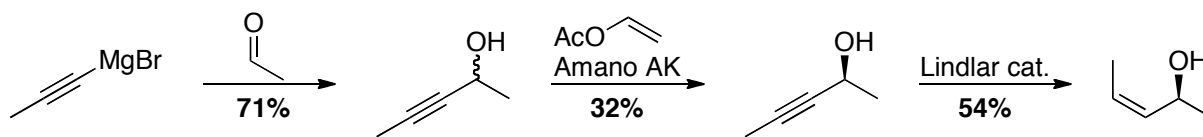

**(*S,Z*)-pent-3-en-2-ol ((*S,Z*)-**1**)**. To a solution of 1-propynylmagnesium bromide (0.5 M in THF, 200 mL, 100 mmol, 1.0 equiv) was slowly added acetaldehyde (5.6 mL, 150 mmol, 1.5 equiv) as a diethyl ether solution (20 mL) at 0 °C. After addition, the reaction was allowed to warm to room temperature over 5 h and was subsequently quenched with careful addition of saturated aqueous  $\text{NH}_4\text{Cl}$ . The resultant layers were separated and the organic was washed with brine, dried over  $\text{MgSO}_4$  and concentrated *in vacuo*. The product was purified by short path vacuum distillation (20 mm Hg, 55 °C) to afford *racemic* 3-pentyn-2-ol (6.00 g, 71% yield). The enzymatic kinetic resolution of 3-pentyn-2-ol was performed according to procedure 1.2.1 with *racemic* 3-pentyn-2-ol (1.35 g, 11.9 mmol, 1.0 equiv), vinyl acetate (3.0 mL, 32 mmol, 2.7 equiv) and Amano AK enzyme (0.46 g, 30 wt %). The reaction mixture was stirred for 20 h at 30 °C and filtered. After concentration of the filtrate, the residue was purified by flash chromatography (pentane/diethyl ether, 10:1  $\rightarrow$  3:1) to afford (*S*)-3-pentyn-2-ol as a colorless oil (0.43 g, 32% yield).  $[\alpha]_D^{20}$  -36.9° (*c* 6.9,  $\text{CHCl}_3$ ). Chiral Capillary GC analysis: 98% ee, (CHIRALDEX BP-M).  $t_R$  = 7.21 min (minor), 7.38 min (major). To a solution of (*S*)-3-pentyn-2-ol (215 mg, 2.56 mmol, 1.0 equiv) in pentane (2 mL) was added Pd/ $\text{CaCO}_3$  poisoned with Pb (12 mg) and quinoline (one drop). The reaction vessel was purged with  $\text{H}_2$  and stirred at ambient temperature for 20 h. The suspension was filtered and the filtrate was concentrated *in vacuo*. The residue was purified by flash chromatography (pentane/diethyl ether, 5:1  $\rightarrow$  3:1) to afford the

title compound as a colorless oil (120 mg, 54% yield). Spectral data were consistent with the literature.

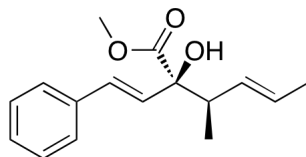

**(2R,3R,E)-methyl 2-hydroxy-3-methyl-2-((E)-styryl)hex-4-enoate (2R,3R)-3.** Prepared by procedure 1.2.3 with (**S,E**)-**1** (44 mg, 0.50 mmol, 1.0 equiv) and **2** (205 mg, 1.0 mmol, 2.0 equiv). The crude residue was purified by flash chromatography (pentane/diethyl ether, 10:1) to afford the title compound as a colorless oil (93 mg, 70%).  $[\alpha]_D^{20} +19.7^\circ$  (*c* 1.0, CHCl<sub>3</sub>). <sup>1</sup>H NMR (400 MHz, CDCl<sub>3</sub>):  $\delta$  7.42-7.41 (m, 2H), 7.35-7.31 (m, 2H), 7.25-7.23 (m, 1H), 6.85 (d, *J* = 15.6 Hz, 1H), 6.26 (d, *J* = 15.6 Hz, 1H), 5.52 (dq, *J* = 15.2, 6.0 Hz, 1H), 5.40 (ddq, *J* = 15.2, 8.4, 1.6 Hz, 1H), 3.78 (s, 3H), 3.33 (s, 1H), 2.70-2.63 (m, 1H), 1.67 (dd, *J* = 6.0, 1.6 Hz, 3H), 1.02 (d, *J* = 7.2 Hz, 3H). <sup>13</sup>C NMR (100 MHz, CDCl<sub>3</sub>):  $\delta$  175.6, 137.7, 131.4, 130.8, 129.2, 128.7, 127.9, 127.3, 126.8, 80.5, 53.1, 44.9, 18.3, 14.2. FTIR (neat):  $\nu_{max}/\text{cm}^{-1}$  3514, 1731, 1448, 1436, 1144. HRMS (p-APCI): *m/z* 243.1379 [(M-OH)<sup>+</sup> requires 243.1380]. HPLC analysis: >99% ee (CHIRALCEL OD-H, 0.5% isopropanol/hexanes, 0.7 mL/min, UV: 254 nm). *t*<sub>R</sub> = 17.6 min (major), 21.9 min (minor).

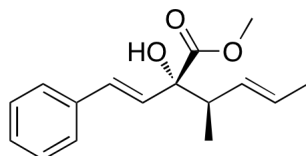

**(2S,3R,E)-methyl 2-hydroxy-3-methyl-2-((E)-styryl)hex-4-enoate ((2S,3R)-3).** Prepared by procedure 1.2.3 with (**S,E**)-**1** (45 mg, 0.50 mmol, 1.0 equiv), **2** (202 mg, 1.0 mmol, 2.0 equiv) and Rh<sub>2</sub>(*R*-DOSP)<sub>4</sub> (9.5 mg, 0.0050 mmol, 0.01 equiv). The crude residue was purified by flash chromatography (pentane/diethyl ether, 15:1) to afford the title compound as a colorless oil (73

mg, 54%).  $[\alpha]_D^{20} +53.1^\circ$  ( $c$  1.0,  $\text{CHCl}_3$ ).  $^1\text{H NMR}$  (400 MHz,  $\text{CDCl}_3$ ):  $\delta$  7.41-7.39(m, 2H), 7.34-7.31 (m, 2H), 7.27-7.23 (m, 1H), 6.78 (d,  $J = 15.6$  Hz, 1H), 6.28 (d,  $J = 15.6$  Hz, 1H), 5.52 (dq,  $J = 15.6, 6.4$  Hz, 1H), 5.40 (ddq,  $J = 15.2, 7.6, 1.6$  Hz, 1H), 3.82 (s, 3H), 3.38 (s, 1H), 2.74-2.67 (m, 1H), 1.65 (dd,  $J = 6.0, 1.6$  Hz, 3H), 1.01 (d,  $J = 7.2$  Hz, 3H).  $^{13}\text{C NMR}$  (100 MHz,  $\text{CDCl}_3$ ):  $\delta$  175.6, 136.8, 130.5, 130.4, 129.9, 128.7, 127.8, 127.4, 126.8, 79.9, 53.3, 44.9, 18.3, 15.3. FTIR (neat):  $\nu_{\text{max}}/\text{cm}^{-1}$  3515, 1727, 1448, 1436, 1152. HRMS (p-APCI):  $m/z$  243.1380 [(M-OH) $^+$  requires 243.1380]. HPLC analysis: >99% ee (CHIRALCEL OD-H, 0.5% isopropanol/hexanes, 0.7 mL/min, UV: 254 nm).  $t_R = 18.5$  min (minor), 19.9 min (major).

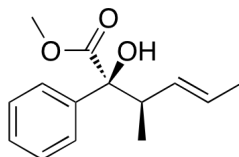

**(2*S*,3*R*,*E*)-methyl 2-hydroxy-3-methyl-2-phenylhex-4-enoate (5a).** Prepared by procedure 1.2.3 with (*S,E*)-**1** (43 mg, 0.50 mmol, 1.0 equiv) and **4a** (175 mg, 1.0 mmol, 2.0 equiv). The crude residue was purified by flash chromatography (pentane/diethyl ether, 10:1) to afford the title compound as a colorless oil (66 mg, 56%).  $[\alpha]_D^{20} +70.9^\circ$  ( $c$  1.0,  $\text{CHCl}_3$ ).  $^1\text{H NMR}$  (400 MHz,  $\text{CDCl}_3$ ):  $\delta$  7.69-7.66 (m, 2H), 7.38-7.34 (m, 2H), 7.31-7.27 (m, 1H), 5.59 (dq,  $J = 15.6, 6.4$  Hz, 1H), 5.50 (m, 1H), 3.74 (s, 3H), 3.67 (s, 1H), 3.10 (m, 1H), 1.69 (dd,  $J = 6.4, 1.6$  Hz, 3H), 0.81 (d,  $J = 7.2$  Hz, 3H).  $^{13}\text{C NMR}$  (100 MHz,  $\text{CDCl}_3$ ):  $\delta$  175.9, 140.4, 131.6, 128.3, 127.7, 127.4, 126.3, 81.2, 53.3, 45.2, 18.4, 14.2. FTIR (neat):  $\nu_{\text{max}}/\text{cm}^{-1}$  3507, 1724, 1447, 1435, 1140, 1005. HRMS (p-APCI):  $m/z$  252.1596 [(M+NH $_4$ ) $^+$  requires 252.1594]. HPLC analysis: >99% ee (S,S-WHELK, 0.5% isopropanol/hexanes, 0.7 mL/min, UV: 230 nm).  $t_R = 9.2$  min (major), 10.6 min (minor).



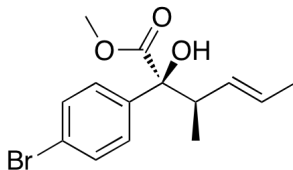

**(2*S*,3*R*,*E*)-methyl 2-(4-bromophenyl)-2-hydroxy-3-methylhex-4-enoate (5b).** Prepared by procedure 1.2.3 with (*S,E*)-**1** (45 mg, 0.50 mmol, 1.0 equiv) and **4b** (259 mg, 1.0 mmol, 2.0 equiv). The crude residue was purified by flash chromatography (pentane/diethyl ether, 20:1) to afford the title compound as a colorless oil (109 mg, 66%).  $[\alpha]_D^{20} +80.3^\circ$  (*c* 1.0, CHCl<sub>3</sub>). <sup>1</sup>H NMR (400 MHz, CDCl<sub>3</sub>):  $\delta$  7.55 (d, *J* = 8.4 Hz, 2H), 7.47 (d, *J* = 8.4 Hz, 2H), 5.59 (dq, *J* = 15.2, 6.4 Hz, 1H), 5.46 (ddq, *J* = 15.2, 8.4, 1.6 Hz, 1H), 3.74 (s, 3H), 3.66 (s, 1H), 3.02 (m, 1H), 1.68 (dd, *J* = 6.4, 1.2 Hz, 3H), 0.78 (d, *J* = 6.8 Hz, 3H). <sup>13</sup>C NMR (100 MHz, CDCl<sub>3</sub>):  $\delta$  175.4, 139.5, 131.4, 131.3, 128.3, 127.7, 121.9, 81.0, 53.5, 45.3, 18.4, 14.1. FTIR (neat):  $\nu_{max}/cm^{-1}$  3503, 1728, 1486, 1436, 1090, 1075, 1010. HRMS (p-APCI): *m/z* 295.0331 [(M-OH)<sup>+</sup> requires 295.0328]. HPLC analysis: >99% ee (CHIRALPAK AD-H, 1.0% isopropanol/hexanes, 0.7 mL/min, UV: 230 nm). *t<sub>R</sub>* = 13.8 min (minor), 17.5 min (major).

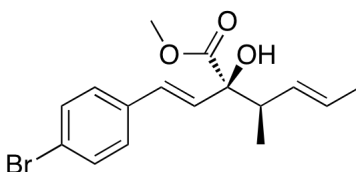

**(2*R*,3*R*,*E*)-methyl 2-((*E*)-4-bromostyryl)-2-hydroxy-3-methylhex-4-enoate (5c).** Prepared by procedure 1.2.3 with (*S,E*)-**1** (44 mg, 0.50 mmol, 1.0 equiv) and **4c** (281 mg, 1.0 mmol, 2.0 equiv). The crude residue was purified by flash chromatography (pentane/diethyl ether, 10:1) to afford the title compound as a white solid (119 mg, 69%). MP = 76-78 °C.  $[\alpha]_D^{20} +35.2^\circ$  (*c* 1.0, CHCl<sub>3</sub>). <sup>1</sup>H NMR (400 MHz, CDCl<sub>3</sub>):  $\delta$  7.43 (d, *J* = 8.4 Hz, 2H), 7.26 (d, *J* = 8.4 Hz, 2H), 6.78 (d, *J* = 15.6 Hz, 1H), 6.24 (d, *J* = 15.6 Hz, 1H), 5.51 (dq, *J* = 15.2, 6.0 Hz, 1H), 5.38 (ddq, *J* = 15.2, 8.8, 1.6 Hz, 1H), 3.77 (s, 3H), 3.32 (s, 1H), 2.68-2.60 (m, 1H), 1.65 (dd, *J* = 6.4, 1.6 Hz,

3H), 0.99 (d,  $J = 7.2$  Hz, 3H).  $^{13}\text{C}$  NMR (100 MHz,  $\text{CDCl}_3$ ):  $\delta$  175.4, 135.6, 131.8, 131.2, 130.0, 129.7, 128.4, 127.5, 121.7, 80.5, 53.2, 44.9, 18.3, 14.2. FTIR (neat):  $\nu_{\text{max}}/\text{cm}^{-1}$  3512, 1731, 1487, 1435, 1072, 1009. HRMS (p-APCI):  $m/z$  321.0492 [(M-OH) $^+$  requires 321.0485]. HPLC analysis: >99% ee (CHIRALCEL OD-H, 0.5% isopropanol/hexanes, 0.7 mL/min, UV: 230 nm).  $t_R = 13.8$  min (minor), 14.9 min (major).

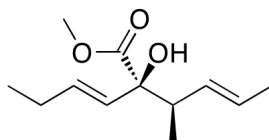

**(*R,E*)-methyl 2-hydroxy-2-((*R,E*)-pent-3-en-2-yl)hex-3-enoate (5d).** Prepared by procedure 1.2.3 with (*S,E*)-**1** (43 mg, 0.50 mmol, 1.0 equiv) and **4d** (155 mg, 1.0 mmol, 2.0 equiv). The crude residue was purified by flash chromatography (pentane/diethyl ether, 12:1) to afford the title compound as a colorless oil (64 mg, 60%).  $[\alpha]_D^{20} -31.0^\circ$  ( $c$  1.0,  $\text{CHCl}_3$ ).  $^1\text{H}$  NMR (400 MHz,  $\text{CDCl}_3$ ):  $\delta$  5.94 (dt,  $J = 15.6, 6.4$  Hz, 1H), 5.51-5.54 (m, 2H), 5.35 (ddd,  $J = 15.6, 8.4, 1.2$  Hz, 1H), 3.74 (s, 3H), 3.12 (s, 1H), 2.52 (dq,  $J = 6.8, 6.8$  Hz, 1H), 2.11-2.04 (m, 2H), 1.62 (dd,  $J = 6.2, 1.2$  Hz, 3H), 0.99 (t,  $J = 7.6$  Hz, 3H), 0.95 (d,  $J = 6.8$  Hz, 3H).  $^{13}\text{C}$  NMR (100 MHz,  $\text{CDCl}_3$ ):  $\delta$  176.2, 133.8, 131.6, 128.4, 127.0, 80.1, 52.9, 44.5, 25.3, 18.3, 13.9, 13.7. FTIR (neat):  $\nu_{\text{max}}/\text{cm}^{-1}$  3521, 2965, 2935, 2875, 1732, 1437, 1157. HRMS (p-APCI):  $m/z$  195.1380 [(M-OH) $^+$  requires 195.1380]. HPLC analysis: >99% ee (CHIRALPAK AD-H, 0.5% isopropanol/hexanes, 0.5 mL/min, UV: 210 nm).  $t_R = 21.6$  min (minor), 23.4 min (major).

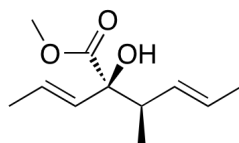

**(*2R,3R,E*)-methyl 2-hydroxy-3-methyl-2-((*E*)-prop-1-en-1-yl)hex-4-enoate (5e).** Prepared by procedure 1.2.3 with (*S,E*)-**1** (43 mg, 0.50 mmol, 1.0 equiv) and **4e** (141 mg, 1.0 mmol, 2.0

equiv). The crude residue was purified by flash chromatography (pentane/diethyl ether, 12:1) to afford the title compound as a colorless oil (55 mg, 55%).  $[\alpha]_D^{20}$   $-20.6^\circ$  ( $c$  1.0,  $\text{CHCl}_3$ ).  $^1\text{H}$  NMR (400 MHz,  $\text{CDCl}_3$ ):  $\delta$  5.94 (dq,  $J = 15.6, 6.6$  Hz, 1H), 5.53-5.49 (m, 1H), 5.48-5.45 (m, 1H), 5.38-5.33 (m, 1H), 3.74 (s, 3H), 3.12 (s, 1H), 2.52 (dq,  $J = 7.2, 7.2$  Hz, 1H), 1.73 (dd,  $J = 7.2, 1.8$  Hz, 3H), 1.63 (dd,  $J = 6.0, 1.8$  Hz, 3H), 0.97 (d,  $J = 6.6$  Hz, 3H).  $^{13}\text{C}$  NMR (100 MHz,  $\text{CDCl}_3$ ):  $\delta$  176.1, 131.6, 130.6, 127.1, 127.0, 80.1, 52.9, 44.5, 18.3, 17.8, 14.0. FTIR (neat):  $\nu_{\text{max}}/\text{cm}^{-1}$  3522, 2969, 2919, 2857, 1732, 1438, 1156. HRMS (p-APCI):  $m/z$  181.1225 [(M-OH) $^+$  requires 181.1223]. HPLC analysis: >99% ee (CHIRALPAK AD-H, 0.5% isopropanol/hexanes, 0.5 mL/min, UV: 210 nm).  $t_R = 19.2$  min (minor), 20.3 min (major).

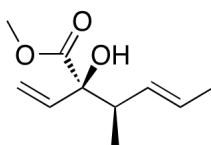

**(2R,3R,E)-methyl 2-hydroxy-3-methyl-2-vinylhex-4-enoate (5f)**. Prepared by procedure 1.2.3 with **(S,E)-1** (45 mg, 0.50 mmol, 1.0 equiv) and **4f** (160 mg, 1.25 mmol, 2.5 equiv). The crude residue was purified by flash chromatography (pentane/diethyl ether, 20:1) to afford the title compound as a colorless oil (41 mg, 43%).  $[\alpha]_D^{20}$   $-52.8^\circ$  ( $c$  1.0,  $\text{CHCl}_3$ ).  $^1\text{H}$  NMR (400 MHz,  $\text{CDCl}_3$ ):  $\delta$  5.91 (dd,  $J = 17.2, 10.8$  Hz, 1H), 5.54-5.44 (m, 2H), 5.39-5.33 (m, 1H), 5.24 (dd,  $J = 10.4, 1.6$  Hz, 1H), 3.75 (s, 3H), 3.15 (s, 1H), 2.56 (m, 1H), 1.64 (dd,  $J = 6.4, 1.2$  Hz, 3H), 0.96 (d,  $J = 6.4$  Hz, 3H).  $^{13}\text{C}$  NMR (100 MHz,  $\text{CDCl}_3$ ):  $\delta$  175.6, 137.7, 131.4, 127.2, 116.2, 80.6, 53.0, 44.3, 18.3, 14.0. FTIR (neat):  $\nu_{\text{max}}/\text{cm}^{-1}$  3519, 2975, 2935, 1732, 1437, 1159. HRMS (p-APCI):  $m/z$  185.1173 [(M+H) $^+$  requires 185.1172]. Chiral Capillary GC analysis: >99% ee (CHIRALDEX BP-M).  $t_R = 14.7$  min (major), 15.2 min (minor).

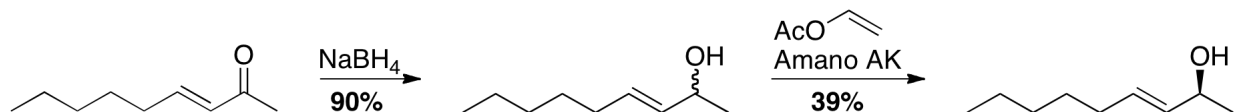

**(*S,E*)-non-3-en-2-ol (6a).** To a solution of (*E*)-3-nonen-2-one (3.0 g, 21 mmol, 1.0 equiv) in methanol (30 mL) at 0 °C was added sodium borohydride (0.9 g, 23 mmol, 1.1 equiv) in methanol (30 mL). The reaction was gradually warmed to room temperature over 3 h and subsequently quenched with saturated aqueous NH<sub>4</sub>Cl. The resultant mixture was concentrated *in vacuo* and the residue was extracted with diethyl ether. The combined organic fractions were washed with brine, dried over MgSO<sub>4</sub> and concentrated *in vacuo*. The residue was purified by flash chromatography (pentane/diethyl ether, 5:1 → 3:1) to afford *racemic* **6a** as a colorless oil (2.7 g, 90% yield). The enzymatic kinetic resolution was performed according to procedure 1.2.1 with *racemic* **6a** (2.0 g, 15 mmol, 1.0 equiv), vinyl acetate (3.7 mL, 40 mmol, 2.7 equiv) and Amano AK enzyme (0.60 g, 30 wt %). The reaction mixture was stirred for 3 h at ambient temperature and filtered. After concentration of the filtrate, the residue was purified by flash chromatography (pentane/diethyl ether, 5:1 → 3:1) to afford the title compound as a colorless oil (0.77 g, 39% yield). Spectral data were consistent with the literature. Chiral Capillary GC analysis: 99% ee (CHIRALDEX BP-M). *t<sub>R</sub>* = 14.17 min (major), 15.10 min (minor).

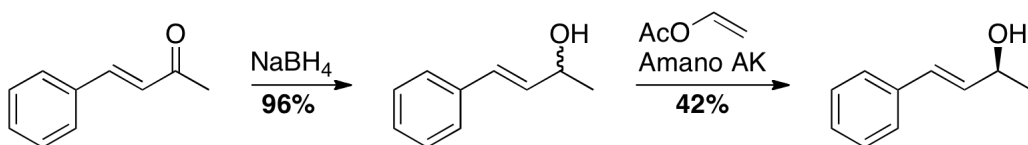

**(*S,E*)-4-phenylbut-3-en-2-ol (6b).** To a solution of (*E*)-4-phenylbut-3-en-2-one (5.0 g, 34 mmol, 1.0 equiv) in methanol (50 mL) was slowly added sodium borohydride (1.4 g, 37 mmol, 1.1 equiv) in methanol (50 mL) at 0 °C. The reaction mixture was gradually warmed to room temperature over 2 h and was subsequently quenched with saturated aqueous NH<sub>4</sub>Cl. The resultant mixture was concentrated *in vacuo* and the residue was extracted with diethyl ether. The combined organic fractions were washed with brine, dried over MgSO<sub>4</sub> and concentrated *in vacuo*. The residue was purified by flash chromatography (hexanes/ethyl acetate, 3:1) to afford

*racemic 6b* as a white solid (4.9 g, 96% yield). The enzymatic kinetic resolution was performed according to procedure 1.2.1 with *racemic 6b* (1.0 g, 6.7 mmol, 1.0 equiv), vinyl acetate (1.7 mL, 18 mmol, 2.7 equiv) and Amano AK enzyme (0.50 g, 50 wt %). The reaction mixture was stirred for 24 h at ambient temperature and filtered. After concentration of the filtrate, the residue was purified by flash chromatography (pentane/diethyl ether, 3:1) to afford the title compound as a white solid (0.43 g, 42% yield). Spectral data were consistent with the literature. HPLC analysis: 99% ee (CHIRALCEL OD-H, 5% isopropanol/hexanes, 0.6 mL/min, UV: 254 nm).  $t_R$  = 21.9 min (minor), 35.6 min (major).

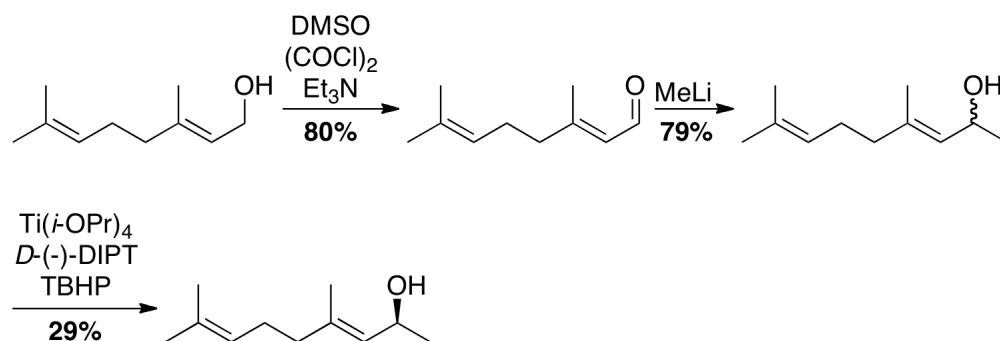

**(*S,E*)-4,8-dimethylnona-3,7-dien-2-ol (6c).** To a dichloromethane solution (40 mL) of oxalyl chloride (4.1 mL, 49 mmol, 1.5 equiv) at -78 °C was slowly added dimethyl sulfoxide (6.5 mL, 91 mmol, 2.8 equiv). The solution was stirred for 1.5 h before adding geraniol (5.0 g, 32 mmol, 1.0 equiv) in dichloromethane (60 mL) dropwise. The solution was stirred an additional 2 h at -78 °C, and then triethylamine (24.0 mL, 172 mmol, 5.3 equiv) was slowly added. The solution was allowed to warm to room temperature overnight. The reaction mixture was poured over H<sub>2</sub>O (100 mL) and the layers were separated. The organic layer was washed with saturated aqueous NH<sub>4</sub>Cl, dried over MgSO<sub>4</sub> and concentrated *in vacuo*. The residue was purified by flash chromatography (pentane/diethyl ether, 7:1) to afford (*E*)-geranial as a colorless oil (3.9 g, 80% yield). To a diethyl ether solution (150 mL) of (*E*)-geranial (3.9 g, 26 mmol, 1.0 equiv) at -78 °C

was slowly added methyl lithium solution (1.6 M in diethyl ether, 21 mL, 33 mmol, 1.3 equiv). After 1.5 h, the reaction was quenched with HCl (*conc.*, 1 mL). The organic layer was then washed sequentially with H<sub>2</sub>O and brine, dried over MgSO<sub>4</sub> and concentrated *in vacuo*. The crude product was purified by flash chromatography (pentane/diethyl ether, 6:1 → 3:1) to afford *racemic* **6c** as a colorless oil (3.4 g, 79% yield). The Sharpless kinetic resolution was performed according to procedure 1.2.2 with *racemic* **6c** (1.68 g, 10.0 mmol, 1.0 equiv). The crude residue was purified by flash chromatography (pentane/diethyl ether, 5:1 → 3:1) to afford the title compound as a colorless oil (0.49 g, 29% yield). Spectral data were consistent with the literature. Chiral Capillary GC analysis: 99% ee, (CHIRALDEX BP-M). *t<sub>R</sub>* = 18.92 min (minor), 19.32 min (major).

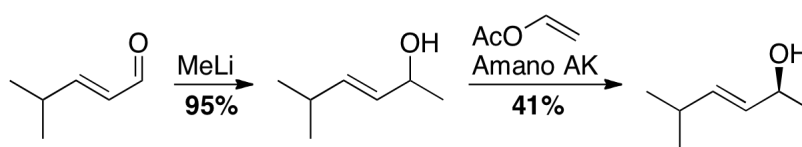

**(S,E)-5-methylhex-3-en-2-ol (6d).** To a tetrahydrofuran solution (100 mL) of (*E*)-4-methylpent-2-enal (4.91 g, 50.0 mmol, 1.0 equiv) at 0 °C was slowly added methyl lithium (1.6 M in diethyl ether, 48 mL, 76 mmol, 1.5 equiv). After 1 h, the reaction was quenched by careful addition of saturated aqueous NH<sub>4</sub>Cl. The resultant layers were separated and the aqueous was extracted with diethyl ether. The combined organic fractions were washed sequentially with H<sub>2</sub>O and brine, dried over MgSO<sub>4</sub> and concentrated *in vacuo*. The crude residue was purified by flash chromatography (pentane/diethyl ether, 3:1) to afford *racemic* **6d** as a colorless oil (5.40g, 95% yield). The enzymatic kinetic resolution was performed according to procedure 1.2.1 with *racemic* **6d** (3.20 g, 28.0 mmol, 1.0 equiv), vinyl acetate (7.80 mL, 84.3 mmol, 3.0 equiv) and Amano AK enzyme (1.60 g, 50 wt %). The reaction mixture was stirred for 2 h at ambient temperature and filtered. After concentration of the filtrate, the residue was purified by flash

chromatography (pentane/diethyl ether, 2:1) to afford the title compound as a colorless oil (1.31 g, 41% yield). Spectral data were consistent with the literature. Chiral Capillary GC analysis: 99% ee, (CHIRALDEX BP-M).  $t_R = 9.23$  min (major), 9.38 min (minor).

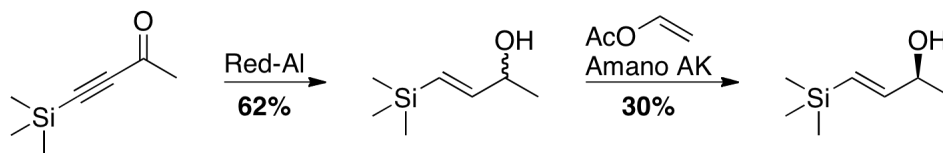

**(*S,E*)-4-(trimethylsilyl)but-3-en-2-ol (6e).** To a solution of 4-(trimethylsilyl)but-3-yn-2-ol (2.6 g, 18 mmol, 1.0 equiv) in diethyl ether (40 mL) was added Red-Al (11.0 mL, 36.4 mmol, 2.0 equiv) at 0 °C. The reaction mixture was allowed to warm to room temperature over 2 h and was subsequently quenched with H<sub>2</sub>O (1 mL) and aqueous H<sub>2</sub>SO<sub>4</sub> (2 mL, 3.6 M) at 0 °C. The resultant layers were separated and the aqueous was extracted with diethyl ether. The combined organic fractions were washed with brine, dried over MgSO<sub>4</sub> and concentrated *in vacuo*. The residue was purified by flash chromatography (pentane/diethyl ether, 10:1 → 5:1) to afford *racemic* **6e** as a colorless oil (1.62 g, 62% yield). The enzymatic kinetic resolution was performed according to procedure 1.2.1 with *racemic* **6e** (1.0 g, 6.9 mmol, 1.0 equiv), vinyl acetate (3.2 mL, 35 mmol, 5.0 equiv) and Amano AK enzyme (0.50 g, 50 wt %). The reaction mixture was stirred for 15 h at 35 °C and filtered. After concentration of the filtrate, the residue was purified by flash chromatography (pentane/diethyl ether, 10:1 → 5:1) to afford the title compound as a colorless oil (0.30 g, 30% yield). Spectral data were consistent with the literature. Chiral Capillary GC analysis: 99% ee, (CHIRALDEX BP-M).  $t_R = 11.58$  min (major), 11.89 min (minor).

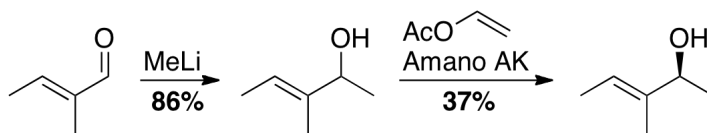

**(*S,E*)-3-methylpent-3-en-2-ol (6f).** To a solution of (*E*)-2-methylbut-2-enal (4.4 g, 52 mmol, 1.0 equiv) in tetrahydrofuran (100 mL) was slowly added methyllithium solution (1.6 M in diethyl ether, 39 mL, 63 mmol, 1.2 equiv) at 0 °C. The reaction was stirred at 0 °C for 4 h and then quenched with saturated aqueous NH<sub>4</sub>Cl. The resultant layers were separated and the aqueous was extracted with diethyl ether. The combined organic fractions were washed with brine, dried over MgSO<sub>4</sub> and concentrated *in vacuo*. The residue was purified by flash chromatography (pentane/diethyl ether, 3:1) to afford *racemic* **6f** as a colorless oil (4.5 g, 86% yield). The enzymatic kinetic resolution was performed according to procedure 1.2.1 with *racemic* **6f** (3.5 g, 35 mmol, 1.0 equiv), vinyl acetate (8.7 mL, 94 mmol, 2.7 equiv) and Amano AK enzyme (1.0 g, 29 wt %). The reaction mixture was stirred for 12 h at ambient temperature and filtered. After concentration of the filtrate, the residue was purified by flash chromatography (pentane/diethyl ether, 3:1) to afford the title compound as a colorless oil (1.29 g, 37% yield). Spectral data were consistent with the literature. Chiral Capillary GC analysis: 99% ee, (CHIRALDEX BP-M).  $t_R$  = 8.76 min (minor), 8.98 min (major).

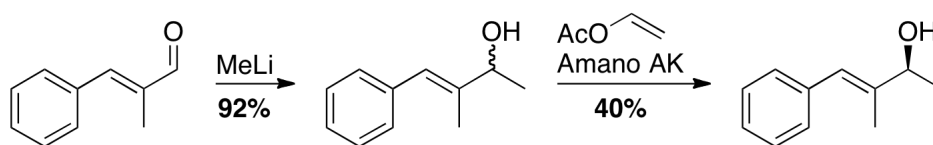

**(*S,E*)-3-methyl-4-phenylbut-3-en-2-ol (6g).** To a tetrahydrofuran solution (250 mL) of (*E*)- $\alpha$ -methylcinnamaldehyde (7.30 mL, 52.0 mmol, 1.0 equiv) at 0 °C was slowly added methyllithium solution (1.6 M in diethyl ether, 60 mL, 96 mmol, 1.8 equiv). After 2 h, the reaction was carefully quenched with saturated aqueous NH<sub>4</sub>Cl. The resultant layers were separated and the aqueous was extracted with diethyl ether. The combined organic fractions were washed with brine, dried over MgSO<sub>4</sub> and concentrated *in vacuo*. The residue was purified by flash chromatography (hexanes/ethyl acetate, 4:1) to afford *racemic* **6g** as a colorless oil (7.76 g, 92%



yield). The enzymatic kinetic resolution was performed according to procedure 1.2.1 with *racemic* **6g** (2.33 g, 14.3 mmol, 1.0 equiv), vinyl acetate (3.60 mL, 38.9 mmol, 2.7 equiv) and Amano AK enzyme (0.70 g, 30 wt %). The reaction mixture was stirred for 12 h at ambient temperature and filtered. After concentration of the filtrate, the residue was purified by flash chromatography (hexanes/ethyl acetate, 3:1) to afford the title compound as a colorless oil (0.93 g, 40% yield). Spectral data were consistent with the literature. HPLC analysis: 99% ee (S,S-WHELK, 1.5% isopropanol/hexanes, 1.0 mL/min, UV: 254 nm).  $t_R$  = 9.7 min (minor), 10.8 min (major).

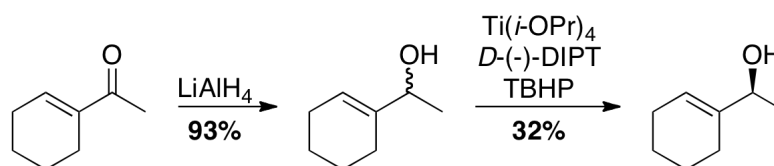

**(S)-1-(cyclohex-1-en-1-yl)ethanol (6h).** To a lithium aluminum hydride (0.6 g, 17 mmol, 0.5 equiv) in diethyl ether (15 mL) at 0 °C was slowly added 1-acetylcyclohexene (4.0 g, 32 mmol, 1.0 equiv) as a diethyl ether solution (15 mL). Following addition, the reaction mixture was warmed to room temperature and stirred for an additional 1 h. The reaction vessel was again cooled to 0 °C and carefully quenched with cold  $\text{H}_2\text{O}$  followed by aqueous  $\text{H}_2\text{SO}_4$  (10%, 5 mL). The resultant layers were separated and the organic was washed with saturated aqueous  $\text{NaHCO}_3$ , dried over  $\text{MgSO}_4$  and concentrated *in vacuo*. The residue was purified by short path vacuum distillation (20 mm Hg, 100 °C) to afford *racemic* **6h** as a colorless oil (3.8 g, 93% yield). The Sharpless kinetic resolution was performed according to procedure 1.2.2 with *racemic* **6h** (1.20 g, 10.0 mmol, 1.0 equiv). The crude residue was purified by flash chromatography (pentane/diethyl ether, 5:1) to afford the title compound as a colorless oil (0.39 g, 32% yield). Spectral data were consistent with the literature. Chiral Capillary GC analysis: 99% ee, (CHIRALDEX BP-M).  $t_R$  = 16.50 min (minor), 16.60 min (major).

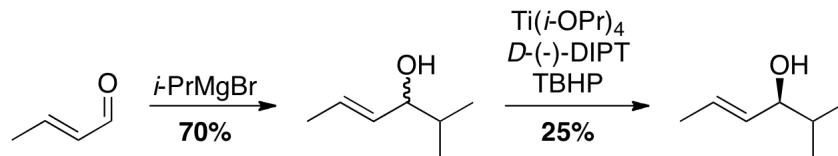

**(*S,E*)-2-methylhex-4-en-3-ol (6i).** To an isopropylmagnesium bromide solution (2.0 M in diethyl ether, 43 mL, 86 mmol, 1.2 equiv) at 0 °C was slowly added crotonaldehyde (5.0 g, 71 mmol, 1.0 equiv) in diethyl ether (10 mL). The solution was then allowed to warm to room temperature and stirred for an additional 1 h. The reaction was carefully quenched with saturated aqueous NH<sub>4</sub>Cl and the resultant layers were separated. The aqueous was extracted with diethyl ether and the combined organic fractions were washed with brine, dried over MgSO<sub>4</sub> and concentrated *in vacuo*. The residue was purified by short path vacuum distillation (20 mm Hg, 65 °C) to afford *racemic* **6i** as a colorless oil (5.7 g, 70% yield). The Sharpless kinetic resolution was performed according to procedure 1.2.2 with *racemic* **6i** (1.14 g, 10.0 mmol, 1.0 equiv). The crude residue was purified by flash chromatography (pentane/diethyl ether, 10:1 → 5:1) to afford the title compound as a colorless oil (0.28 g, 25% yield). Spectral data were consistent with the literature. Chiral Capillary GC analysis: 99% ee, (CHIRALDEX BP-M).  $t_R$  = 9.83 min (minor), 9.85 min (major).

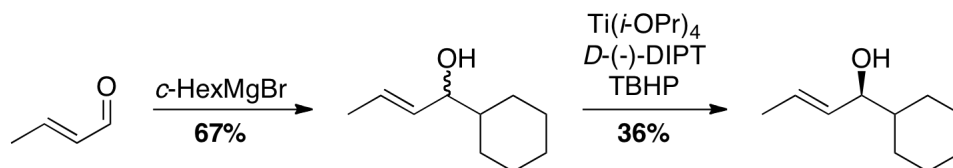

**(*S,E*)-1-cyclohexylbut-2-en-1-ol (6j).** To a cyclohexylmagnesium bromide solution (1.0 M in tetrahydrofuran, 32 mL, 32 mmol, 1.5 equiv) at 0 °C was slowly added crotonaldehyde (1.5 g, 21 mmol, 1.0 equiv) in tetrahydrofuran (10 mL). The solution was then allowed to warm to room temperature and stirred for an additional 1 h. The reaction was carefully quenched with saturated aqueous NH<sub>4</sub>Cl and the resultant layers were separated. The aqueous was extracted with diethyl

ether and the combined organic fractions were washed with brine, dried over  $\text{MgSO}_4$  and concentrated *in vacuo*. The residue was purified by flash chromatography (pentane/diethyl ether, 5:1) to afford *racemic* **6j** as a colorless oil (2.2 g, 67% yield). The Sharpless kinetic resolution was performed according to procedure 1.2.2 with *racemic* **6i** (1.54 g, 10.0 mmol, 1.0 equiv). The crude residue was purified by flash chromatography (pentane/diethyl ether, 5:1) to afford the title compound as a colorless oil (0.55 g, 36% yield). Spectral data were consistent with the literature. Mosher ester  $^1\text{H}$  NMR analysis: 99% ee.

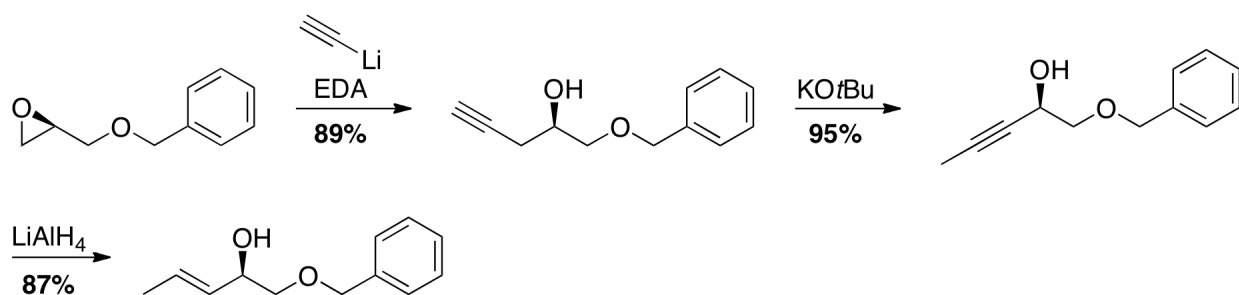

**(R,E)-1-(benzyloxy)pent-3-en-2-ol (6k).** To a solution of benzyl (*R*)-(-)-glycidyl ether (3.5 g, 21 mmol, 1.0 equiv) in dimethyl sulfoxide (40 mL) at 0 °C was added lithium acetylide ethylenediamine complex (3.3 g, 33 mmol, 1.6 equiv) in several portions. After 1 h, the reaction was quenched by sequential addition of brine and aqueous HCl (5.0 M). The aqueous was extracted with diethyl ether and the combined organic fractions were washed with aqueous  $\text{NaHCO}_3$  (5%) and brine, dried over  $\text{MgSO}_4$  and concentrated *in vacuo*. The residue was purified by flash chromatography (pentane/diethyl ether, 2:1) to afford (*R*)-1-(benzyloxy)pent-4-yn-2-ol as a pale yellow oil (3.54 g, 89% yield). To a dimethyl sulfoxide (5 mL) solution of (*R*)-1-(benzyloxy)pent-4-yn-2-ol (3.0 g, 16 mmol, 1.0 equiv) was added potassium *tert*-butoxide (3.7 g, 32, 2.0 equiv) as a dimethyl sulfoxide (20 mL) solution. The reaction was stirred at ambient temperature for 1 h before quenching sequentially with brine and HCl (5.0 M). The aqueous was extracted with diethyl ether and the combined organic fractions were washed with aqueous

NaHCO<sub>3</sub> (5%) and brine, dried over MgSO<sub>4</sub> and concentrated *in vacuo*. The residue was purified by flash chromatography (pentane/diethyl ether, 2:1) to afford (*R*)-1-(benzyloxy)pent-3-yn-2-ol (2.86 g, 95% yield). To a tetrahydrofuran (5 mL) of lithium aluminum hydride (333 mg, 8.77 mmol, 2.0 equiv) was slowly added (*R*)-1-(benzyloxy)pent-3-yn-2-ol (833 mg, 4.38 mmol, 1.0 equiv) as a tetrahydrofuran (5 mL) solution. Following addition, the reaction was heated to reflux for 4 h. Upon cooling to ambient temperature, the reaction was quenched with aqueous ammonium hydroxide (30%) and the aqueous was extracted with diethyl ether. The organic fractions were combined, dried over MgSO<sub>4</sub> and concentrated *in vacuo*. The residue was purified by flash chromatography (pentane/diethyl ether, 3:1 → 2:1) to afford the title compound as a colorless oil (730 mg, 87% yield). Spectral data were consistent with the literature. Mosher ester  
<sup>1</sup>H NMR analysis: 99% ee.

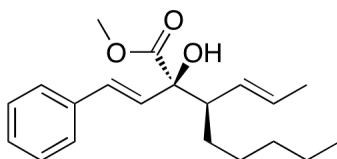

**(2*R*,3*R*)-methyl 2-hydroxy-3-((*E*)-prop-1-en-1-yl)-2-((*E*)-styryl)octanoate (7a).** Prepared by procedure 1.2.3 with **6a** (71 mg, 0.50 mmol, 1.0 equiv) and **2** (206 mg, 1.0 mmol, 2.0 equiv). The crude residue was purified by flash chromatography (pentane/diethyl ether, 30:1 → 20:1) to afford the title compound as a colorless oil (131 mg, 83%).  $[\alpha]_D^{20}$  -4.5° (*c* 1.0, CHCl<sub>3</sub>). <sup>1</sup>H NMR (400 MHz, CDCl<sub>3</sub>): δ 7.42-7.39 (m, 2H), 7.34-7.30 (m, 2H), 7.26-7.22 (m, 1H), 6.84 (d, *J* = 16.0 Hz, 1H), 6.24 (d, *J* = 16.0 Hz, 1H), 5.48 (dq, *J* = 15.2, 6.4 Hz, 1H), 5.31 (ddq, *J* = 15.2, 9.2, 1.6 Hz, 1H), 3.75 (s, 3H), 3.40 (s, 1H), 2.39 (t, *J* = 11.2 Hz, 1H), 1.67 (dd, *J* = 6.4, 1.6 Hz, 3H), 1.53-1.50 (m, 1H), 1.31-1.08 (m, 7H), 0.84 (t, *J* = 6.8 Hz, 3H). <sup>13</sup>C NMR (100 MHz, CDCl<sub>3</sub>): δ 175.6, 136.7, 130.8, 130.2, 129.4, 128.7, 127.8, 126.8, 80.9, 53.1, 50.9, 31.9, 27.7, 27.4, 22.8, 18.3, 14.2. FTIR (neat):  $\nu_{max}/cm^{-1}$  3515, 1731, 1447, 1436, 1136. HRMS (p-APCI): *m/z* 299.2003

$[(M+H)^+]$  requires 299.2006]. HPLC analysis: >99% ee (CHIRALCEL OD-H, 0.5% isopropanol/hexanes, 0.7 mL/min, UV: 254 nm).  $t_R$  = 13.7 min (major), 16.8 min (minor).

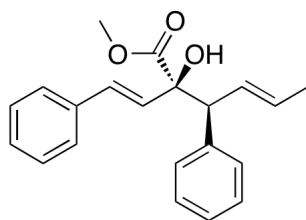

**(2R,3S,E)-methyl 2-hydroxy-3-phenyl-2-((E)-styryl)hex-4-enoate (7b).** Prepared by procedure 1.2.3 with **6b** (77 mg, 0.50 mmol, 1.0 equiv) and **2** (203 mg, 1.0 mmol, 2.0 equiv). The crude residue was purified by flash chromatography (pentane/diethyl ether, 30:1 → 10:1) to afford the title compound as a white solid (119 mg, 71%). MP = 112-114 °C.  $[\alpha]_D^{20}$  -148.5° (*c* 1.1, CHCl<sub>3</sub>). <sup>1</sup>H NMR (400 MHz, CDCl<sub>3</sub>): δ 7.34-7.32 (m, 2H), 7.27-7.14 (m, 8H), 6.55 (d, *J* = 16.0 Hz, 1H), 6.26 (d, *J* = 16.0 Hz, 1H), 5.94 (ddq, *J* = 15.2, 9.2, 1.6 Hz), 5.31 (dq, *J* = 15.2, 6.8 Hz, 1H), 3.82 (s, 3H), 3.81 (d, *J* = 9.2 Hz, 1H), 3.59 (s, 1H), 1.69 (dd, *J* = 6.4, 1.6 Hz, 3H). <sup>13</sup>C NMR (100 MHz, CDCl<sub>3</sub>): δ 175.1, 139.4, 136.7, 130.8, 129.5, 129.1, 129.0, 128.8, 128.6, 128.2, 127.7, 127.0, 126.7, 80.9, 57.2, 53.3, 18.4. FTIR (neat):  $\nu_{max}/cm^{-1}$  3506, 1728, 1448, 1436, 1140, 1118. HRMS (p-APCI): *m/z* 305.1535  $[(M-OH)^+]$  requires 305.1536]. HPLC analysis: >99% ee (CHIRALCEL OD-H, 0.5% isopropanol/hexanes, 0.7 mL/min, UV: 254 nm).  $t_R$  = 25.3 min (major), 32.0 min (minor).

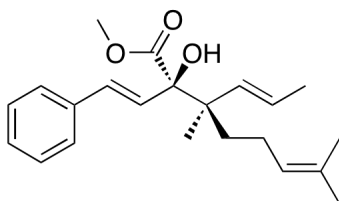

**(2R,3R)-methyl 2-hydroxy-3,7-dimethyl-3-((E)-prop-1-en-1-yl)-2-((E)-styryl)oct-6-enoate (7c).** Prepared by procedure 1.2.3 with **6c** (85 mg, 0.50 mmol, 1.0 equiv) and **2** (200 mg, 1.0 mmol, 2.0 equiv). The crude residue was purified by flash chromatography (pentane/diethyl

ether, 30:1 → 10:1) to afford the title compound as a colorless oil (140 mg, 82%).  $[\alpha]_D^{20}$  -29.4° (*c* 1.0, CHCl<sub>3</sub>). <sup>1</sup>H NMR (400 MHz, CDCl<sub>3</sub>): δ 7.40 (d, *J* = 7.2 Hz, 2H), 7.31 (d, *J* = 7.2 Hz, 2H), 7.24-7.21 (m, 1H), 6.81 (d, *J* = 15.6 Hz, 1H), 6.46 (d, *J* = 15.6 Hz, 1H), 5.55 (d, *J* = 15.6 Hz, 1H), 5.43 (dq, *J* = 15.6, 6.0 Hz, 1H), 5.07 (t, *J* = 7.6 Hz, 1H), 3.79 (s, 3H), 3.50 (s, 1H), 1.84-1.77 (m, 2H), 1.74 (d, *J* = 6.0 Hz, 3H), 1.65 (s, 3H), 1.61-1.56 (m, 1H), 1.42-1.34 (m, 1H), 1.12 (s, 3H). <sup>13</sup>C NMR (100 MHz, CDCl<sub>3</sub>): δ 175.2, 137.0, 134.8, 131.3, 130.9, 128.7, 127.8, 127.7, 126.9, 125.9, 125.1, 82.4, 53.0, 47.6, 35.2, 25.9, 23.0, 18.6, 17.8, 17.7. FTIR (neat):  $\nu_{max}/cm^{-1}$  3507, 1721, 1445, 1436, 1144. HRMS (p-APCI): *m/z* 343.2264 [(M+H)<sup>+</sup> requires 343.2268]. HPLC analysis: >99% ee (CHIRALPAK OD-H, 0.3% isopropanol/hexanes, 0.7 mL/min, UV: 254 nm). *t<sub>R</sub>* = 18.1 min (major), 29.7 min (minor).

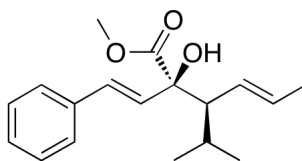

**(2*R*,3*R*,*E*)-methyl 2-hydroxy-3-isopropyl-2-((*E*)-styryl)hex-4-enoate (7d).** Prepared by procedure 1.2.3 with **6d** (57 mg, 0.50 mmol, 1.0 equiv) and **2** (202 mg, 1.0 mmol, 2.0 equiv). The crude residue was purified by flash chromatography (pentane/diethyl ether, 15:1) to afford the title compound as a white solid (100 mg, 70%). MP = 47-48 °C.  $[\alpha]_D^{20}$  -26.9° (*c* 1.0, CHCl<sub>3</sub>). <sup>1</sup>H NMR (400 MHz, CDCl<sub>3</sub>): δ 7.42-7.40 (m, 2H), 7.34-7.30 (m, 2H), 7.26-7.22 (m, 1H), 6.88 (d, *J* = 16.0 Hz, 1H), 6.29 (d, *J* = 16.0 Hz, 1H), 5.53-5.40 (m, 2H), 3.74 (s, 3H), 3.47 (s, 1H), 2.37 (dd, *J* = 9.0, 3.0 Hz, 1H), 2.05 (dq, *J* = 6.8, 6.8, 2.8 Hz, 1H), 1.69 (d, *J* = 4.8 Hz, 3H), 0.89 (d, *J* = 6.8 Hz, 3H), 0.84 (d, *J* = 6.8 Hz, 3H). <sup>13</sup>C NMR (100 MHz, CDCl<sub>3</sub>): δ 175.6, 136.6, 130.2, 129.7, 129.5, 128.6, 127.6, 126.7, 126.2, 81.5, 55.4, 53.0, 27.1, 23.3, 18.4, 18.2. FTIR (neat):  $\nu_{max}/cm^{-1}$  3508, 3026, 2954, 2873, 1728, 1448, 1436, 1145. HRMS (p-APCI): *m/z*

271.1697 [(M-OH)<sup>+</sup> requires 271.1693]. HPLC analysis: >99% ee (CHIRALPAK AD-H, 0.3% isopropanol/hexanes, 0.8 mL/min, UV: 230 nm).  $t_R$  = 14.6 min (major), 19.2 min (minor).

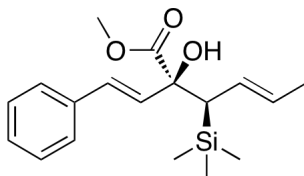

**(2*S*,3*R*,*E*)-methyl 2-hydroxy-2-((*E*)-styryl)-3-(trimethylsilyl)hex-4-enoate (7e).** Prepared by procedure 1.2.3 with **6e** (73 mg, 0.50 mmol, 1.0 equiv) and **2** (208 mg, 1.0 mmol, 2.0 equiv). The crude residue was purified by flash chromatography (pentane/diethyl ether, 30:1 → 20:1) to afford the title compound as a white solid (68 mg, 42%). MP = 58-60 °C.  $[\alpha]_D^{20}$  -67.3° (*c* 1.0, CHCl<sub>3</sub>). <sup>1</sup>H NMR (400 MHz, CDCl<sub>3</sub>): δ 7.40-7.38 (m, 2H), 7.35-7.31 (m, 2H), 7.26-7.23 (m, 1H), 6.82 (d, *J* = 15.6 Hz, 1H), 6.26 (d, *J* = 15.6 Hz, 1H), 5.50-5.34 (m, 2H), 3.72 (s, 3H), 3.61 (s, 1H), 2.12 (d, *J* = 7.0 Hz, 1H), 1.67 (d, *J* = 4.8 Hz, 3H), 0.02 (s, 9H). <sup>13</sup>C NMR (100 MHz, CDCl<sub>3</sub>): δ 176.1, 136.8, 131.1, 129.8, 128.8, 127.8, 127.5, 126.8, 80.5, 53.1, 43.9, 18.4, -0.3. FTIR (neat):  $\nu_{max}/cm^{-1}$  3512, 2953, 1728, 1448, 1436, 1099. HRMS (p-APCI): *m/z* 301.1620 [(M-OH)<sup>+</sup> requires 301.1618]. HPLC analysis: >99% ee (CHIRALCEL OD-H, 0.5% isopropanol/hexanes, 0.7 mL/min, UV: 254 nm).  $t_R$  = 13.1 min (major), 16.5 min (minor).

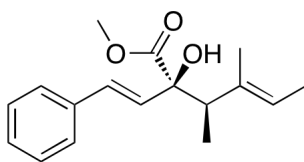

**(2*R*,3*R*,*E*)-methyl 2-hydroxy-3,4-dimethyl-2-((*E*)-styryl)hex-4-enoate (7f).** Prepared by procedure 1.2.3 with **6f** (45 mg, 0.50 mmol, 1.0 equiv) and **2** (214 mg, 1.0 mmol, 2.0 equiv). The crude residue was purified by flash chromatography (pentane/diethyl ether, 20:1) to afford the title compound as a colorless oil (86 mg, 61%).  $[\alpha]_D^{20}$  +29.4° (*c* 1.0, CHCl<sub>3</sub>). <sup>1</sup>H NMR (400 MHz, CDCl<sub>3</sub>): δ 7.43-7.41 (m, 2H), 7.35-7.31 (m, 2H), 7.27-7.23 (m, 1H), 6.84 (d, *J* = 16.0 Hz,

1H), 6.28 (d,  $J = 16.0$  Hz, 1H), 5.38 (dq,  $J = 6.8, 1.2$  Hz, 1H), 3.76 (s, 3H), 3.32 (s, 1H), 2.70 (q,  $J = 7.2$  Hz, 1H), 1.65 (t,  $J = 1.2, 3H$ ), 1.58 (dd,  $J = 6.8, 0.8$  Hz, 3H), 1.08 (d,  $J = 7.6$  Hz, 3H).  $^{13}C$  NMR (100 MHz,  $CDCl_3$ ):  $\delta$  175.8, 136.8, 136.7, 130.5, 129.8, 128.7, 126.8, 122.3, 81.3, 52.9, 49.7, 14.0, 13.6, 12.8. FTIR (neat):  $\nu_{max}/cm^{-1}$  3513, 1729, 1448, 1436, 1145. HRMS (p-APCI):  $m/z$  257.1536 [(M-OH) $^+$  requires 257.1536]. HPLC analysis: >99% ee (CHIRALCEL OD-H, 0.5% isopropanol/hexanes, 0.7 mL/min, UV: 254 nm).  $t_R = 17.3$  min (major), 33.4 min (minor).

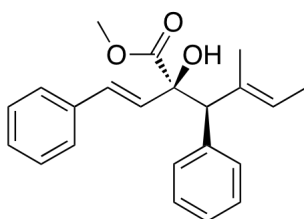

**(2R,3S,E)-methyl 2-hydroxy-4-methyl-3-phenyl-2-((E)-styryl)hex-4-enoate (7g).** Prepared by procedure 1.2.3 with **6g** (81 mg, 0.50 mmol, 1.0 equiv) and **2** (202 mg, 1.0 mmol, 2.0 equiv). The crude residue was purified by flash chromatography (hexanes/ethyl acetate, 10:1) to afford the title compound as a white solid (114 mg, 68%). MP = 106-108 °C.  $[\alpha]_D^{20} -101.2^\circ$  ( $c$  1.0,  $CHCl_3$ ).  $^1H$  NMR (400 MHz,  $CDCl_3$ ):  $\delta$  7.42-7.40 (m, 2H), 7.26-7.12 (m, 8H), 6.63 (d,  $J = 16.0$  Hz, 1H), 6.18 (d,  $J = 16.0$  Hz, 1H), 5.75 (q,  $J = 7.2$  Hz, 1H), 3.89 (s, 1H), 3.81 (s, 3H), 3.62 (s, 1H), 1.60 (d,  $J = 7.2$  Hz, 3H), 1.58 (d,  $J = 1.2$  Hz, 3H).  $^{13}C$  NMR (100 MHz,  $CDCl_3$ ):  $\delta$  175.5, 138.3, 136.5, 135.6, 130.7, 130.3, 130.2, 128.4, 127.7, 127.5, 126.6, 126.5, 122.2, 81.1, 60.1, 53.1, 15.8, 13.7. FTIR (neat):  $\nu_{max}/cm^{-1}$  . HRMS (p-APCI):  $m/z$  337.1806 [(M+H) $^+$  requires 337.1798]. HPLC analysis: >99% ee (CHIRALPAK AD-H, 1.0% isopropanol/hexanes, 1.0 mL/min, UV: 254 nm).  $t_R = 19.2$  min (minor), 21.2 min (major).

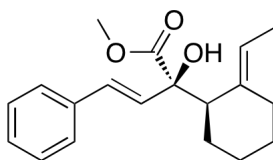



**(*R,E*)-methyl 2-((*R,E*)-2-ethylidenecyclohexyl)-2-hydroxy-4-phenylbut-3-enoate (7h).**

Prepared by procedure 1.2.3 with **6h** (64 mg, 0.50 mmol, 1.0 equiv) and **2** (202 mg, 1.0 mmol, 2.0 equiv). The crude residue was purified by flash chromatography (pentane/diethyl ether, 30:1) to afford the title compound as a white solid (117 mg, 77%). MP = 136-137 °C.  $[\alpha]_D^{20}$  -58.6° (*c* 1.0, CHCl<sub>3</sub>). <sup>1</sup>H NMR (400 MHz, CDCl<sub>3</sub>): δ 7.42-7.39 (m, 2H), 7.33-7.29 (m, 2H), 7.25-7.21 (m, 1H), 6.86 (d, *J* = 16.0 Hz, 1H), 6.24 (d, *J* = 16.0 Hz, 1H), 5.24 (q, *J* = 6.8 Hz, 1H), 3.74 (s, 3H), 3.40 (s, 1H), 2.61 (t, *J* = 5.2 Hz, 1H), 2.30-2.25 (m, 2H), 1.89-1.82 (m, 2H), 1.68-1.53 (m, 2H), 1.57 (d, *J* = 6.8 Hz, 3H), 1.44-1.32 (m, 2H). <sup>13</sup>C NMR (100 MHz, CDCl<sub>3</sub>): δ 176.1, 139.3, 136.7, 130.8, 130.6, 128.7, 127.9, 126.9, 118.5, 82.6, 53.1, 48.9, 27.5, 27.4, 27.3, 24.0, 13.1. FTIR (neat):  $\nu_{max}/cm^{-1}$  3503, 1729, 1447, 1133. HRMS (p-APCI): *m/z* 283.1690 [(M-OH)<sup>+</sup> requires 283.1693]. HPLC analysis: >99% ee (CHIRALPAK AD-H, 0.3% isopropanol/hexanes, 0.7 mL/min, UV: 254 nm). *t<sub>R</sub>* = 29.7 min (minor), 33.1 min (major).

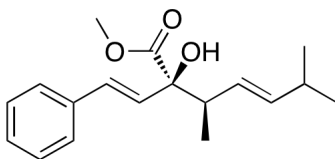

**(2*R*,3*R*,*E*)-methyl 2-hydroxy-3,6-dimethyl-2-((*E*)-styryl)hept-4-enoate (7i).** Prepared by procedure 1.2.3 with **6i** (59 mg, 0.50 mmol, 1.0 equiv) and **2** (201 mg, 1.0 mmol, 2.0 equiv). The crude residue was purified by flash chromatography (pentane/diethyl ether, 30:1 → 20:1) to afford the title compound as a colorless oil (112 mg, 75%).  $[\alpha]_D^{20}$  +28.8° (*c* 1.0, CHCl<sub>3</sub>). <sup>1</sup>H NMR (400 MHz, CDCl<sub>3</sub>): δ 7.43-7.41 (m, 2H), 7.35-7.31 (m, 2H), 7.27-7.23 (m, 1H), 6.86 (d, *J* = 16.0 Hz, 1H), 6.26 (d, *J* = 16.0 Hz, 1H), 5.46 (dd, *J* = 16.0, 6.8 Hz, 1H), 5.34 (dd, *J* = 16.0, 8.8 Hz, 1H), 3.77 (s, 3H), 3.36 (s, 1H), 2.66-2.59 (m, 1H), 2.29-2.21 (m, 1H), 1.02 (d, *J* = 7.2 Hz, 3H), 0.97 (d, *J* = 6.8 Hz, 3H), 0.96 (d, *J* = 6.8 Hz, 3H). <sup>13</sup>C NMR (100 MHz, CDCl<sub>3</sub>): δ 175.6, 140.2, 136.7, 130.8, 129.3, 128.7, 127.9, 127.3, 126.9, 80.7, 53.0, 45.0, 31.3, 22.9, 22.8, 14.2.

FTIR (neat):  $\nu_{max}/\text{cm}^{-1}$  3515, 1731, 1448, 1436, 1142. HRMS (p-APCI):  $m/z$  271.1694 [(M-OH)<sup>+</sup> requires 271.1693]. HPLC analysis: >99% ee (CHIRALCEL OD-H, 0.5% isopropanol/hexanes, 0.7 mL/min, UV: 254 nm).  $t_R$  = 15.9 min (minor), 19.6 min (major).

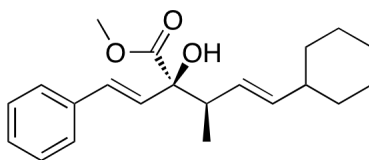

**(2R,3R,E)-methyl 5-cyclohexyl-2-hydroxy-3-methyl-2-((E)-styryl)pent-4-enoate (7j).**

Prepared by procedure 1.2.3 with **6j** (78 mg, 0.50 mmol, 1.0 equiv) and **2** (204 mg, 1.0 mmol, 2.0 equiv). The crude residue was purified by flash chromatography (pentane/diethyl ether, 20:1 → 10:1) to afford the title compound as a white solid (143 mg, 86%). MP = 130-131 °C.  $[\alpha]_D^{20} +34.1^\circ$  ( $c$  1.0, CHCl<sub>3</sub>). <sup>1</sup>H NMR (400 MHz, CDCl<sub>3</sub>):  $\delta$  7.43-7.41 (m, 2H), 7.34-7.31 (m, 2H), 7.26-7.23 (m, 1H), 6.86 (d,  $J$  = 16.0 Hz, 1H), 6.26 (d,  $J$  = 16.0 Hz, 1H), 5.43 (dd,  $J$  = 15.6, 6.4 Hz, 1H), 5.34 (dd,  $J$  = 15.6, 8.4 Hz, 1H), 3.77 (s, 3H), 3.35 (s, 1H), 2.66-2.58 (m, 1H), 1.92-1.88 (m, 1H), 1.74-1.64 (m, 1H), 1.31-1.13 (m, 4H), 1.08-1.04 (m, 1H), 1.02 (d,  $J$  = 6.8 Hz, 3H). <sup>13</sup>C NMR (100 MHz, CDCl<sub>3</sub>):  $\delta$  175.6, 139.0, 136.7, 130.8, 129.2, 128.8, 127.9, 127.8, 126.8, 80.8, 53.1, 45.1, 40.9, 33.4, 33.3, 26.3, 26.2, 26.1, 14.2. FTIR (neat):  $\nu_{max}/\text{cm}^{-1}$  3516, 2922, 2849, 1730, 1447, 114. HRMS (p-APCI):  $m/z$  311.2005 [(M-OH)<sup>+</sup> requires 311.2006]. HPLC analysis: >99% ee (CHIRALCEL OD-H, 0.5% isopropanol/hexanes, 0.7 mL/min, UV: 254 nm).  $t_R$  = 16.4 min (major), 19.9 min (minor).

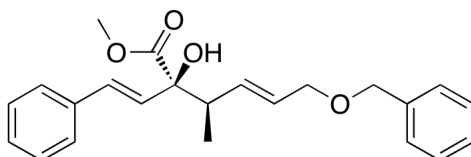

**(2R,3R,E)-methyl 6-(benzyloxy)-2-hydroxy-3-methyl-2-((E)-styryl)hex-4-enoate (7k).**

Prepared by procedure 1.2.3 with **6k** (96 mg, 0.50 mmol, 1.0 equiv) and **2** (202 mg, 1.0 mmol,

2.0 equiv). The crude residue was purified by flash chromatography (pentane/diethyl ether, 10:1) to afford the title compound as a colorless oil (129 mg, 70%). MP = 130-131 °C.  $[\alpha]_D^{20} +34.1^\circ$  ( $c$  1.0,  $\text{CHCl}_3$ ).  $[\alpha]_D^{20} +13.1^\circ$  ( $c$  1.0,  $\text{CHCl}_3$ ).  $^1\text{H NMR}$  (400 MHz,  $\text{CDCl}_3$ ):  $\delta$  7.42-7.39 (m, 2H), 7.36-7.22 (m, 8H), 6.86 (d,  $J = 15.6$  Hz, 1H), 6.25 (d,  $J = 15.6$  Hz, 1H), 5.73-5.62 (m, 2H), 4.51-4.44 (m, 2H), 4.02 -3.92 (m, 2H), 3.77 (s, 3H), 3.39 (s, 1H), 2.79-2.71 (m, 1H), 1.06 (d,  $J = 7.2$  Hz, 3H).  $^{13}\text{C NMR}$  (100 MHz,  $\text{CDCl}_3$ ):  $\delta$  175.5, 138.6, 136.6, 134.4, 131.2, 129.0, 128.8, 128.6, 128.0, 127.9, 127.8, 126.9, 80.3, 71.9, 70.7, 83.3, 44.8, 14.0. FTIR (neat):  $\nu_{\text{max}}/\text{cm}^{-1}$  3512, 3027, 2951, 2852, 1730, 1496, 1449, 1144. HRMS (p-APCI):  $m/z$  367.1910 [(M+H)<sup>+</sup> requires 367.1917]. HPLC analysis: >99% ee (CHIRALCEL AD-H, 1.0% isopropanol/hexanes, 1.0 mL/min, UV: 254 nm).  $t_R = 22.7$  min (minor), 23.9 min (major).

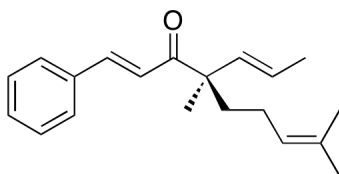

**(*R,E*)-4,8-dimethyl-1-phenyl-4-((*E*)-prop-1-en-1-yl)nona-1,7-dien-3-one (8a).** To a tetrahydrofuran (4 mL) solution of **7c** (270 mg, 0.79 mmol, 1.0 equiv) at 0 °C was added lithium aluminum hydride solution (1.0 M in tetrahydrofuran, 2.4 mL, 2.4 mmol, 3.0 equiv) dropwise over 30 min. Following addition, the reaction was allowed to warm to room temperature and stirred for an additional 4 h. The reaction vessel was again cooled to 0 °C and the reaction was carefully quenched by sequential addition of ethyl acetate (2 mL) and saturated aqueous sodium potassium tartrate (10 mL). The mixture was partitioned between  $\text{H}_2\text{O}$  (15 mL) and ethyl acetate (15 mL) and stirred until two distinct layers formed. The layers were separated and the aqueous was extracted with ethyl acetate. The organic fractions were combined and washed with brine, dried over  $\text{MgSO}_4$  and concentrated *in vacuo*. The crude residue was dissolved in

tetrahydrofuran/H<sub>2</sub>O (1:1, 10 mL) and sodium periodate (338 mg, 1.58 mmol, 2.0 equiv) was added in one portion with vigorous stirring. The reaction was stirred at room temperature for 6 h and the quenched with addition of aqueous sodium thiosulfate solution (20 mL). The aqueous was extracted with ethyl acetate and the combined organic fractions were washed with brine, dried over MgSO<sub>4</sub> and concentrated *in vacuo*. The crude residue was purified by flash chromatography (pentane/diethyl ether, 20:1 → 10:1) to afford the title compound as a colorless oil (200 mg, 90% yield).  $[\alpha]_D^{20} +2.4^\circ$  (*c* 1.0, CHCl<sub>3</sub>). <sup>1</sup>H NMR (400 MHz, CDCl<sub>3</sub>):  $\delta$  7.65 (d, *J* = 15.8 Hz, 1H), 7.56-7.53 (m, 2H), 7.39-7.36 (m, 3H), 7.04 (d, *J* = 15.8 Hz, 1H), 5.64-5.53 (m, 2H), 5.11-5.07 (m, 1H), 2.00-1.89 (m, 1H) 1.88-1.76 (m, 2H), 1.74 (d, *J* = 4.8 Hz, 3H), 1.68-1.61 (m, 1H), 1.65 (s, 3H), 1.55 (s, 3H), 1.26 (s, 3H). <sup>13</sup>C NMR (100 MHz, CDCl<sub>3</sub>):  $\delta$  201.6, 142.3, 135.3, 134.7, 132.0, 130.3, 129.0, 128.5, 126.4, 124.5, 122.5, 52.7, 38.0, 25.9, 23.3, 20.9, 18.7, 17.8. FTIR (neat):  $\nu_{max}/\text{cm}^{-1}$  3026, 2966, 2915, 2855, 1683, 1608, 1576, 1495, 1448, 1049. HRMS (p-APCI): *m/z* 283.2055 [(M+H)<sup>+</sup> requires 283.2056].

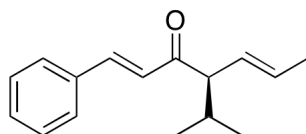

**(*R,1E,5E*)-4-isopropyl-1-phenylhepta-1,5-dien-3-one (8b).** To a tetrahydrofuran (4 mL) solution of **7d** (240 mg, 0.83 mmol, 1.0 equiv) at 0 °C was added lithium aluminum hydride solution (1.0 M in tetrahydrofuran, 2.5 mL, 2.5 mmol, 3.0 equiv) dropwise over 30 min. Following addition, the reaction was allowed to warm to room temperature and stirred for an additional 4 h. The reaction vessel was again cooled to 0 °C and the reaction was carefully quenched by sequential addition of ethyl acetate (5 mL) and saturated aqueous sodium potassium tartrate (25 mL). The mixture was further dilute with ethyl acetate (20 mL) and stirred until two distinct layers formed. The layers were separated and the aqueous was extracted with ethyl

acetate. The organic fractions were combined and washed with brine, dried over  $\text{MgSO}_4$  and concentrated *in vacuo*. The crude residue was dissolved in tetrahydrofuran/ $\text{H}_2\text{O}$  (1:1, 10 mL) and sodium periodate (355 mg, 1.66 mmol, 2.0 equiv) was added in one portion with vigorous stirring. The reaction was stirred at room temperature for 4 h and the quenched with addition of aqueous sodium thiosulfate solution (25 mL). The aqueous was extracted with ethyl acetate and the combined organic fractions were washed with brine, dried over  $\text{Na}_2\text{SO}_4$  and concentrated *in vacuo*. The crude residue was purified by flash chromatography (pentane/diethyl ether, 15:1) to afford the title compound as a colorless oil (169 mg, 89% yield).  $[\alpha]_{\text{D}}^{20} -74.2^\circ$  (*c* 2.4,  $\text{CHCl}_3$ ).  $^1\text{H}$  NMR (400 MHz,  $\text{CDCl}_3$ ):  $\delta$  7.60 (d,  $J = 16.0$  Hz, 1H), 7.57-7.55 (m, 2H), 7.39-7.37 (m, 3H), 6.80 (d,  $J = 16.0$  Hz, 1H), 5.60 (dq,  $J = 15.2, 6.4$  Hz, 1H), 5.43 (m, 1H), 3.02 (t,  $J = 9.0$  Hz, 1H), 2.17-2.05 (m, 1H), 1.71 (dd,  $J = 6.4, 1.6$  Hz, 3H), 0.92 (d,  $J = 1.6$  Hz, 3H), 0.90 (d,  $J = 1.6$  Hz, 3H).  $^{13}\text{C}$  NMR (100 MHz,  $\text{CDCl}_3$ ):  $\delta$  201.0, 142.5, 134.9, 130.5, 129.8, 129.1, 128.5, 128.4, 125.6, 63.1, 30.1, 21.4, 20.1, 18.3. FTIR (neat):  $\nu_{\text{max}}/\text{cm}^{-1}$  3026, 2959, 2870, 1685, 1652, 1607, 1576, 1465. HRMS (p-APCI):  $m/z$  229.1591 [(M+H) $^+$  requires 229.1587]. HPLC analysis: >99% ee (CHIRALCEL AD-H, 0.4% isopropanol/hexanes, 0.4 mL/min, UV: 254 nm).  $t_R = 22.6$  min (major), 24.9 min (minor).

### 3. Stereochemical Rationale

The absolute configuration of compounds **5c**, **7b** and **7h** were each determined by X-ray diffraction and applied to all other products of the same enantiomeric series by analogy.

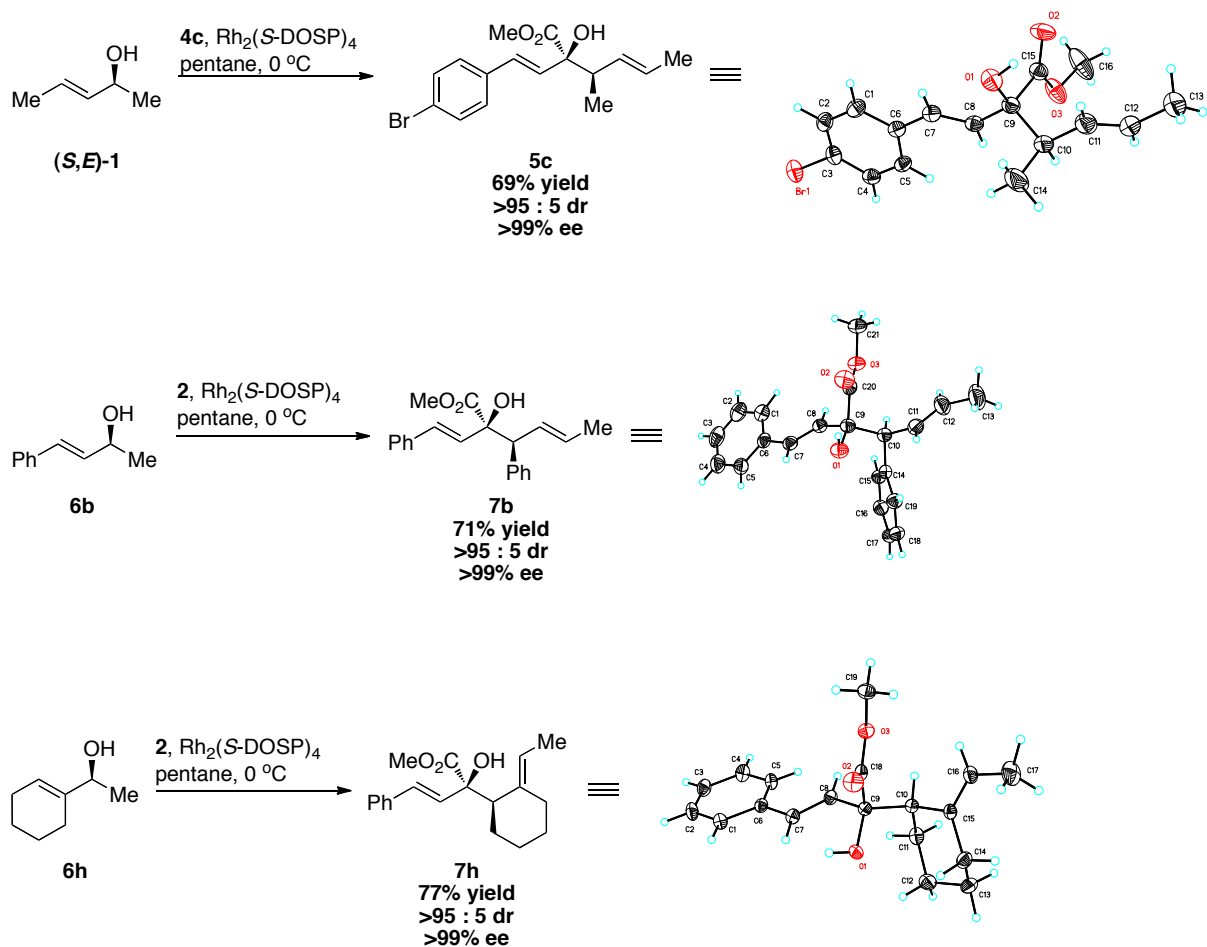

The [2,3]-sigmatropic rearrangement was conducted with both **6j** and *ent*-**6j** and **2** catalyzed by Rh<sub>2</sub>(S-DOSP)<sub>4</sub>, to prepare the two C<sub>3</sub>-diastereoisomers of **7j**. Analysis of each product by X-Ray crystallography verified that, indeed, the configuration of the C<sub>2</sub>-stereocenter was governed by the rhodium catalyst and the C<sub>3</sub>-stereocenter by the alcohol geometry. The stereochemistry of products in Table 1 was assigned by inference from these results. Complete crystallographic data is available in Section 5.

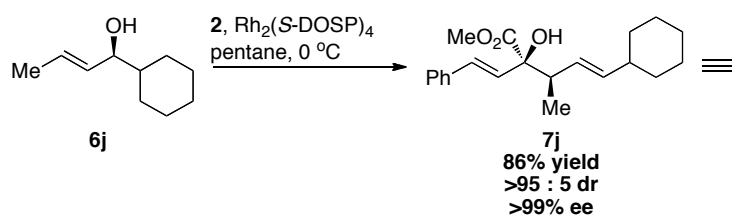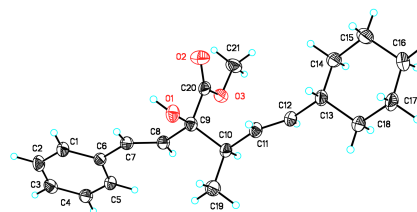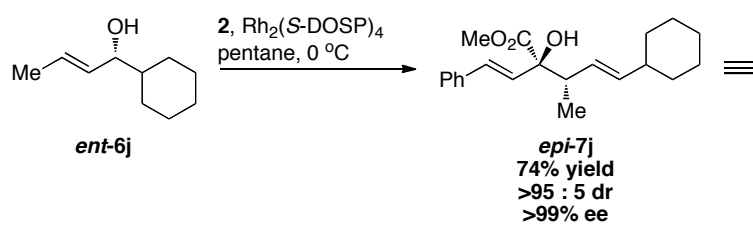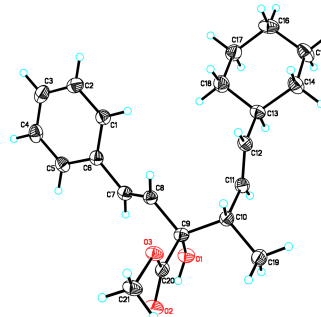

#### 4. References

1. Still, W. C.; Kahn, M.; Mitra, A. *J. Org. Chem.* **1978**, *43*, 2923.
2. Davies, J. M. L.; Yang, J.; Manning, J. R. *Tetrahedron: Asymmetry* **2006**, *17*, 665.
3. Davies, H. M. L.; Bruzinski, P.; Hutcheson, D. K.; Fall, M. J. *J. Am. Chem. Soc.* **1996**, *118*, 6897.
4. Davies, H. M. L.; Hansen, T.; Churchill, M. R. *J. Am. Chem. Soc.* **2000**, *122*, 3063.
5. Bulugahapitiya, P; Landais, Y.; Para-Rapado, L.; Planchenault, D.; Weber, V. *J. Org. Chem.* **1997**, *62*, 1630.
6. Davies, H. M. L.; Hougland, P. W.; Cantrell Jr., W. R. *Synth. Commun.* **1992**, *22*, 971.
7. Wood, J. L.; Moniz, G. A.; Pflum, D. A.; Stoltz, B. M.; Holubec, A. A.; Dietrich, H.-J. *J. Am. Chem. Soc.* **1999**, *121*, 1748.
8. Martin, V. S.; Woodard, S. S.; Katsuki, T.; Yamada, Y.; Ikeda, M.; Sharpless, K. B. *J. Am. Chem. Soc.* **1981**, *103*, 6237.



## 5. Crude NMR Data

Table 1, Entry 1

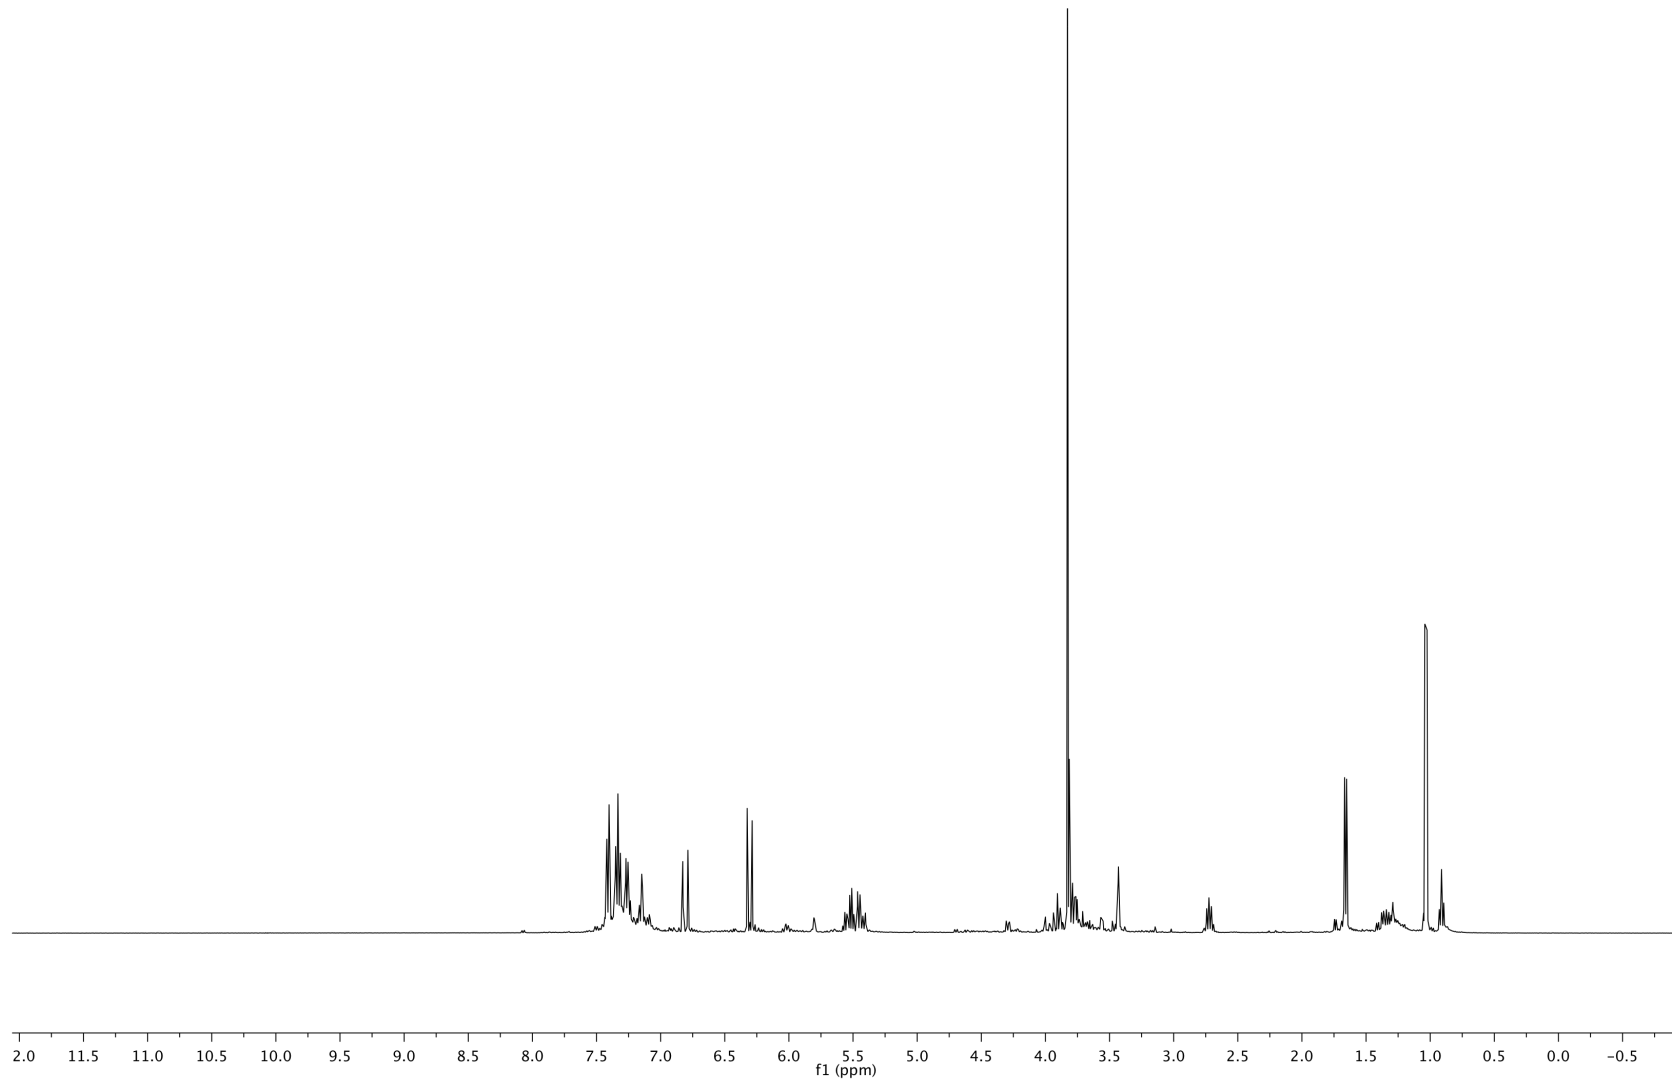

Table 1, Entry 3

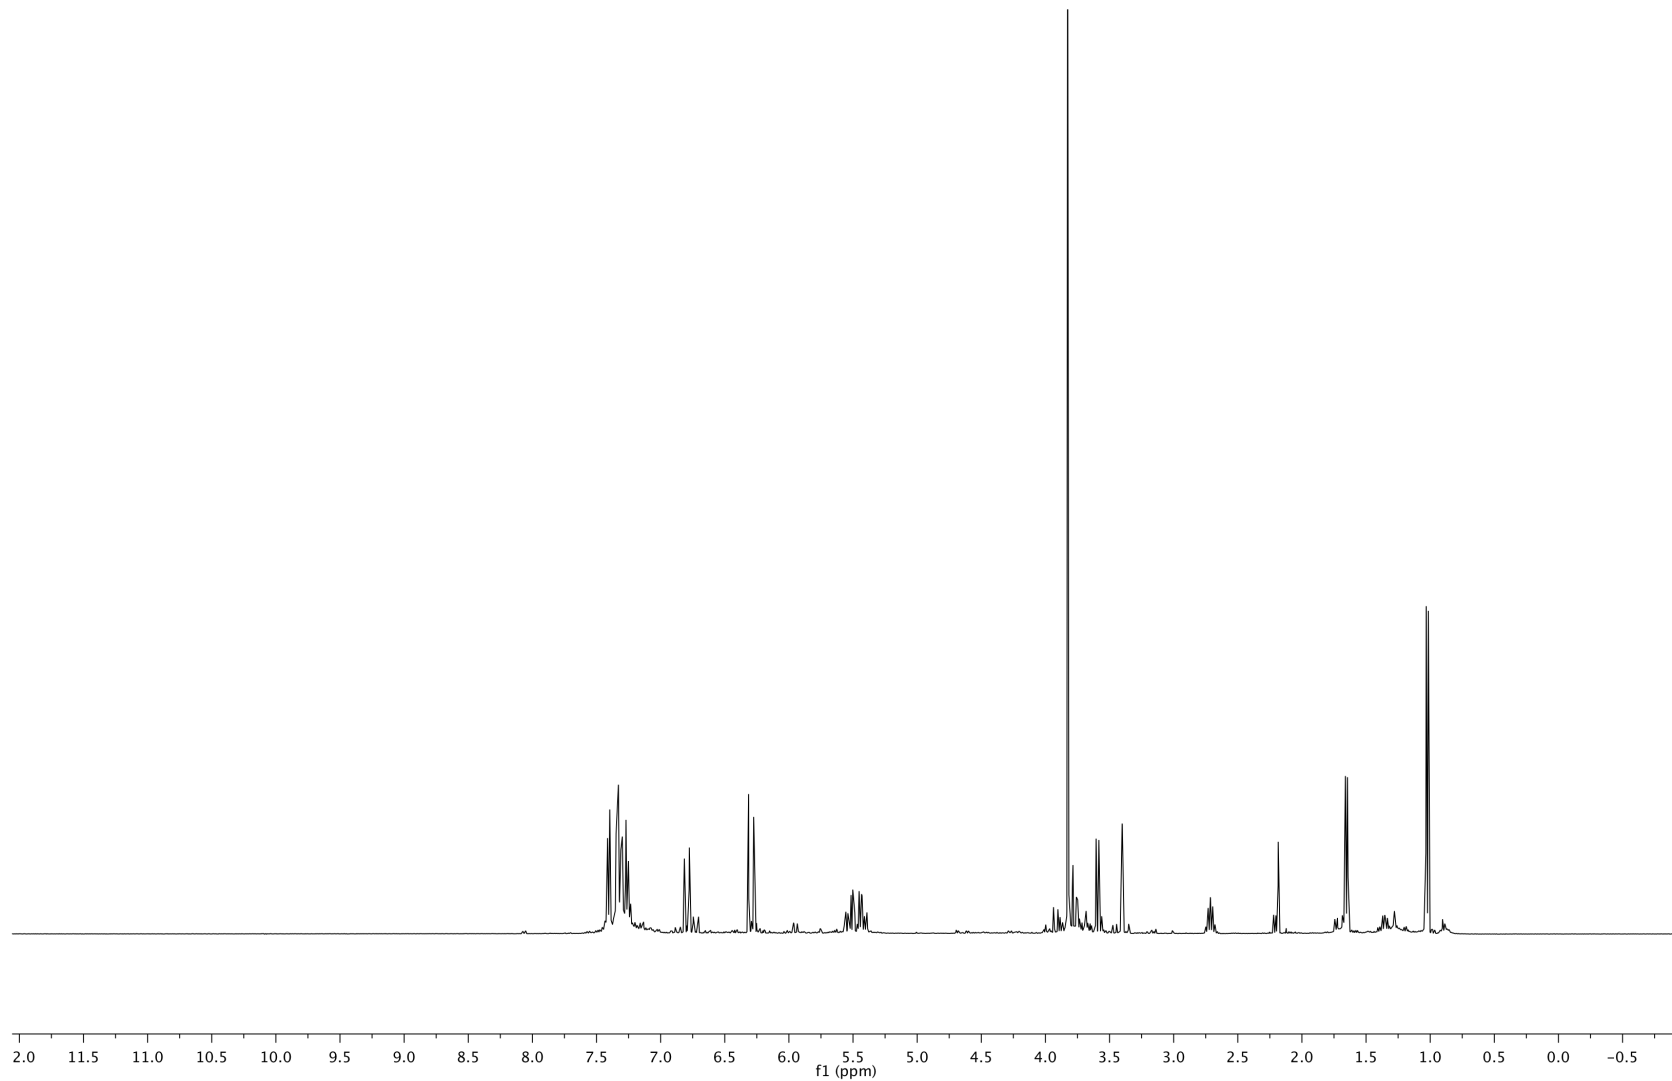

Table 1, Entry 6

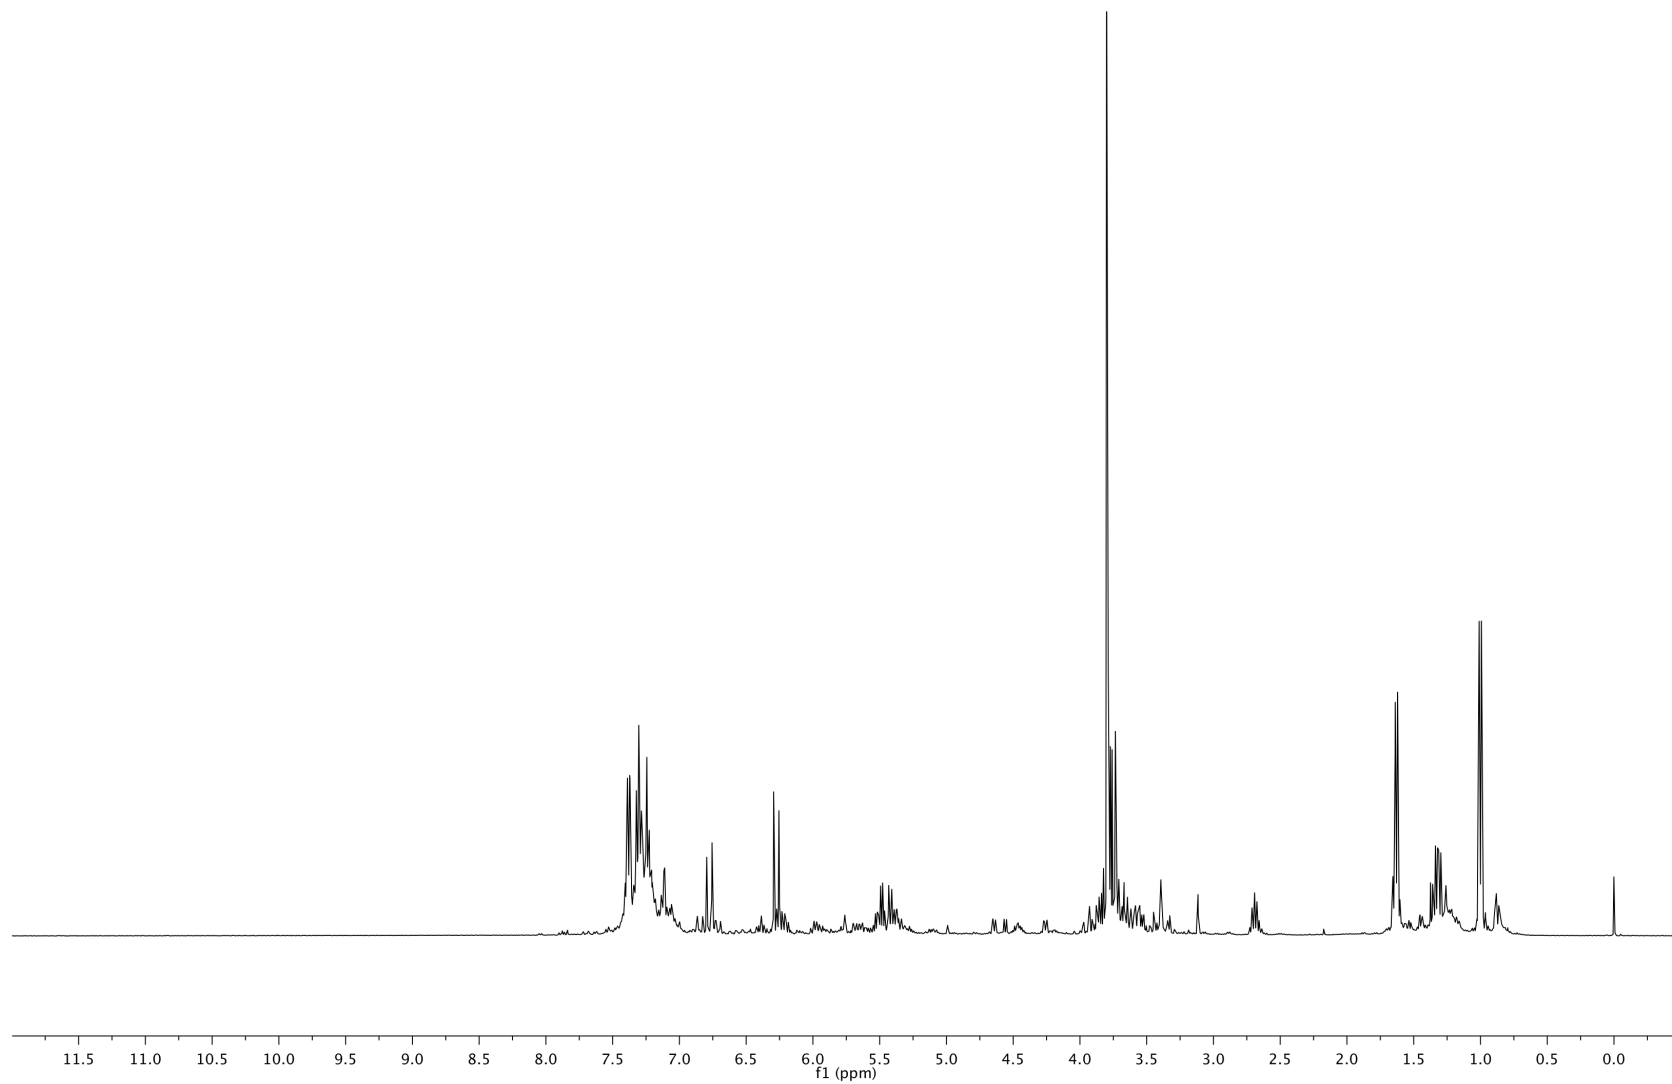

5a crude

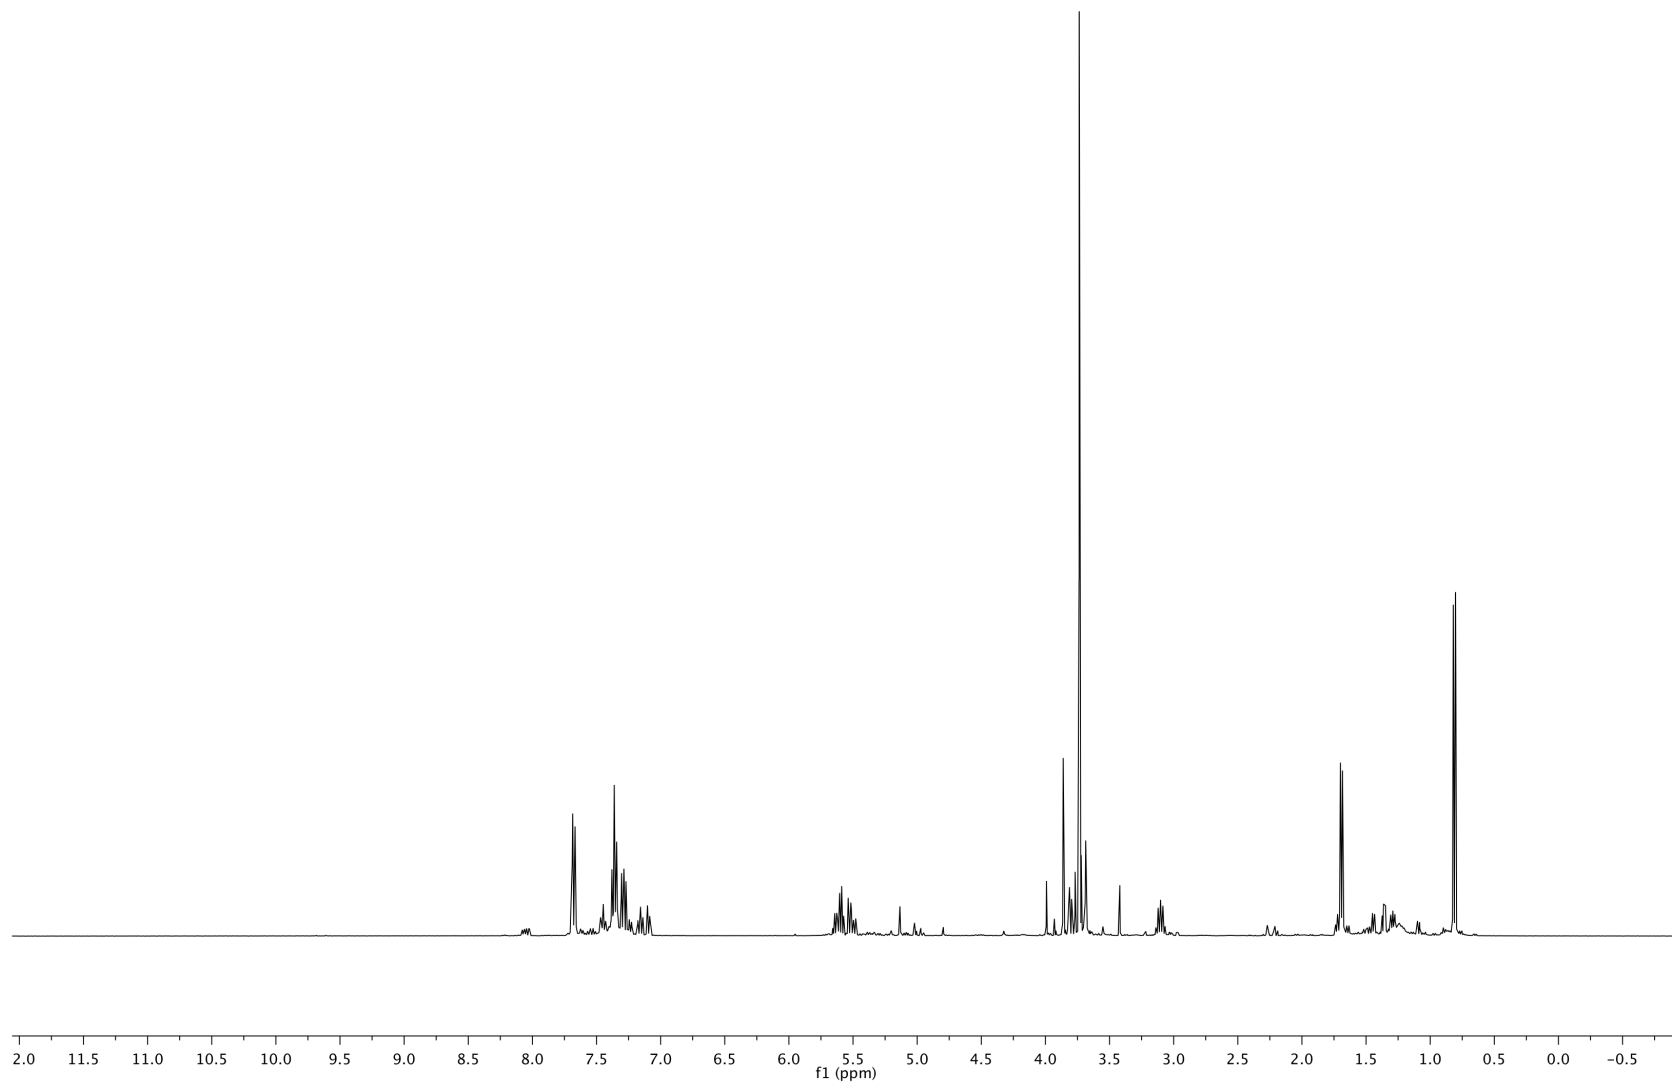

5b crude

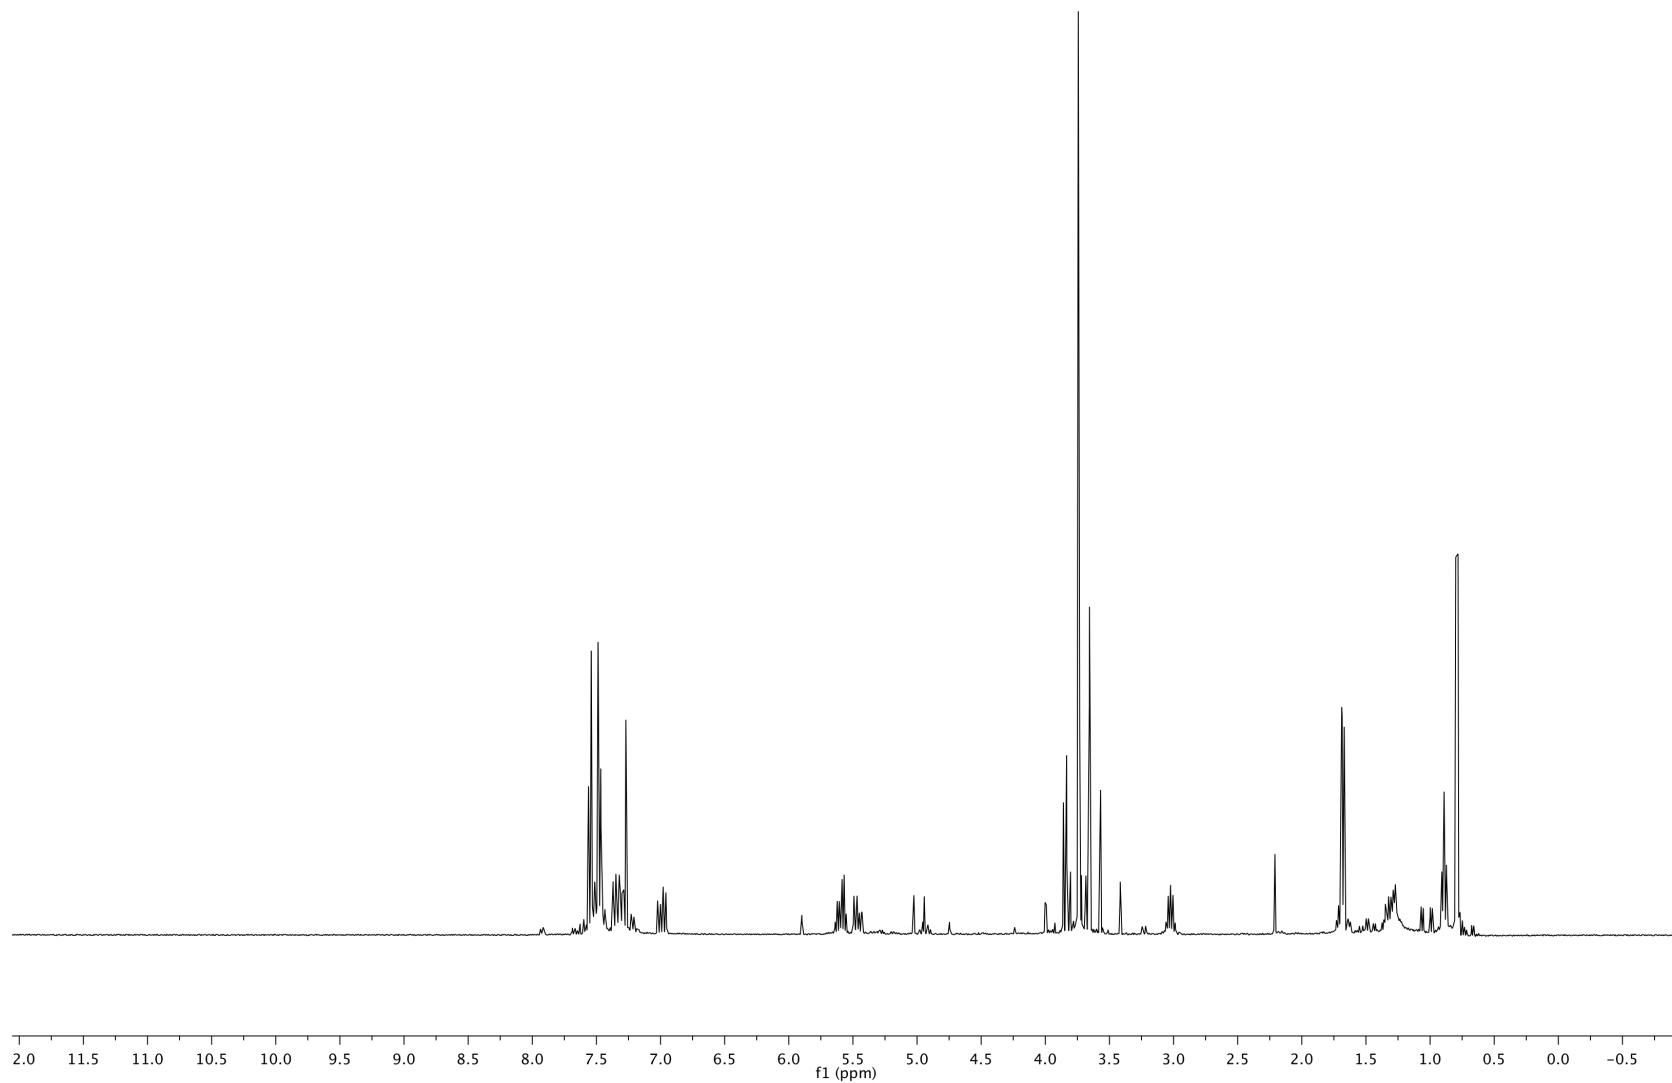

5c crude

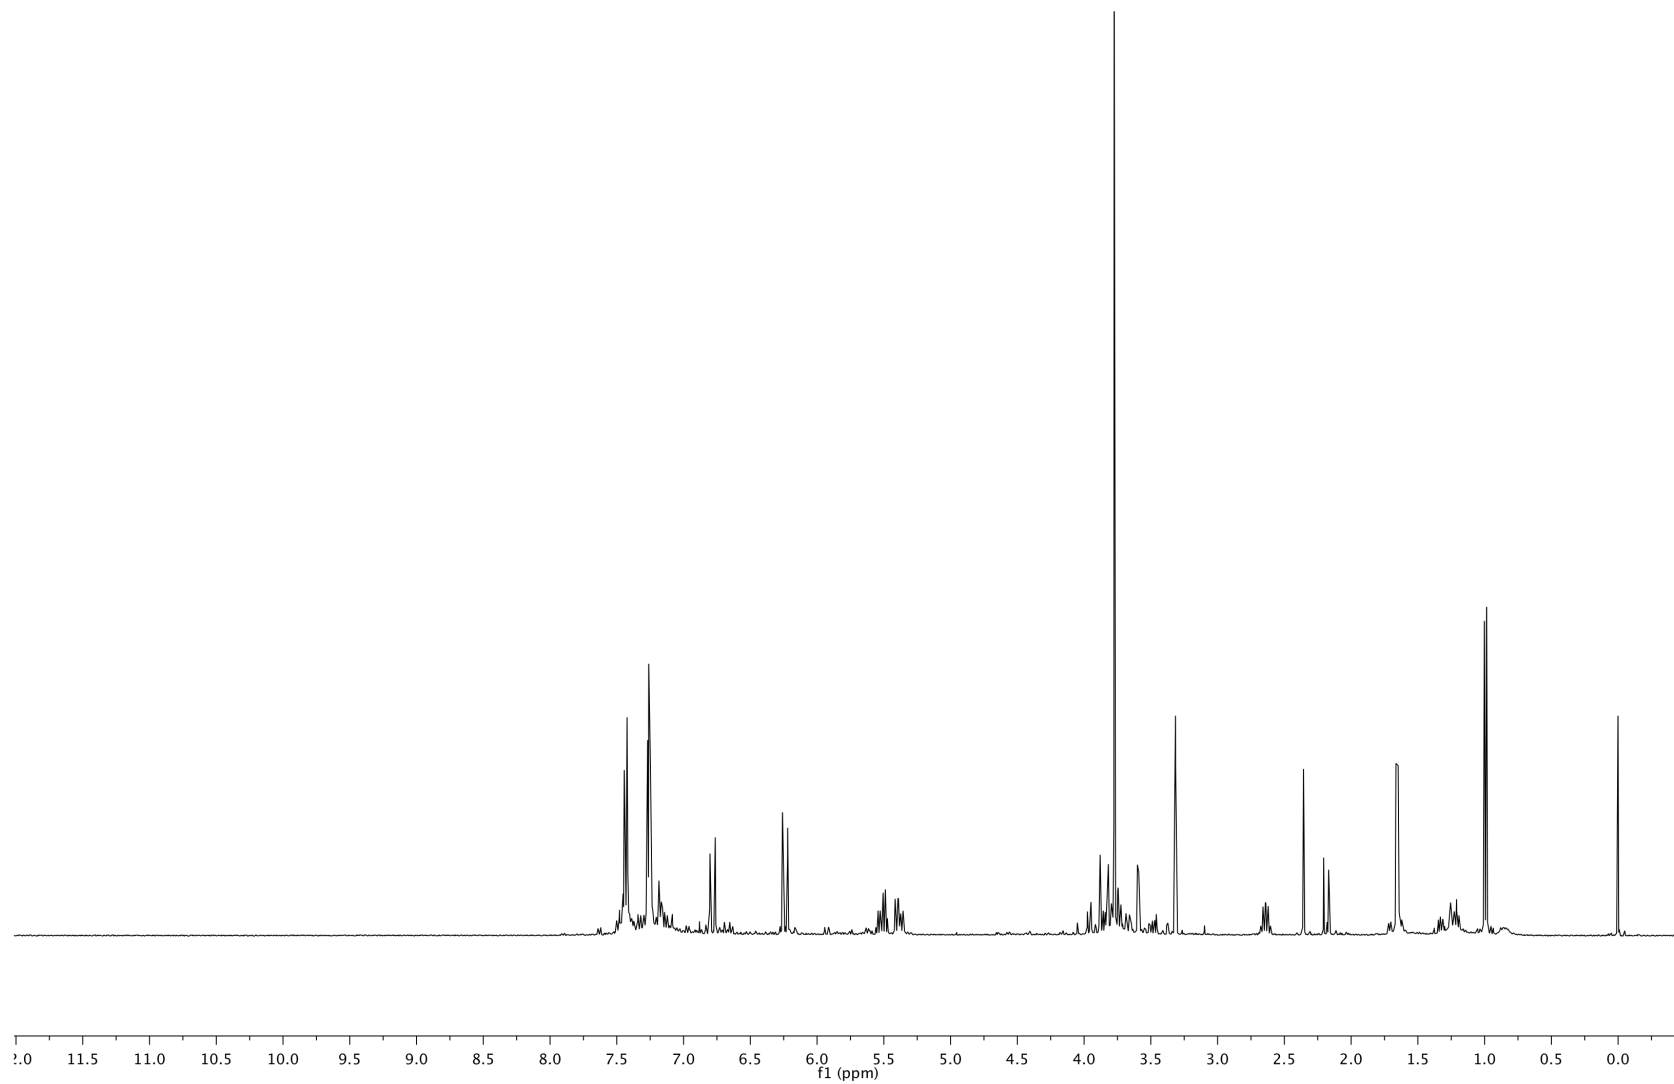

5d crude

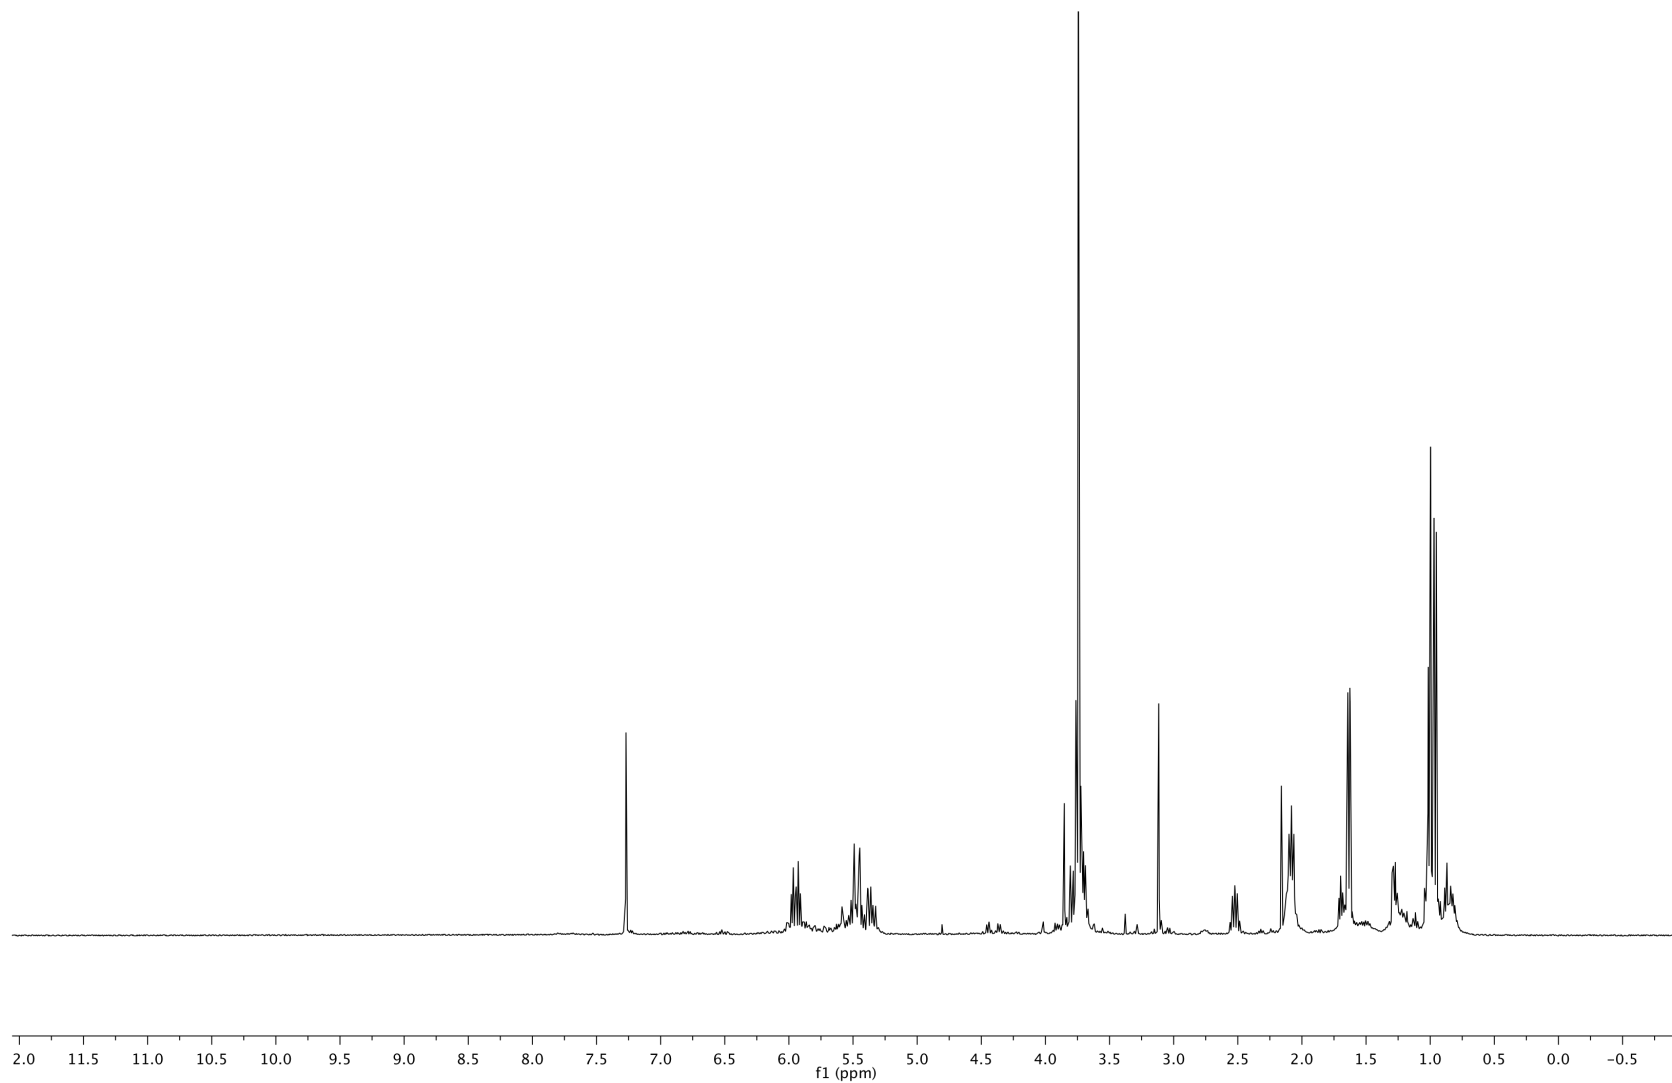



5e crude

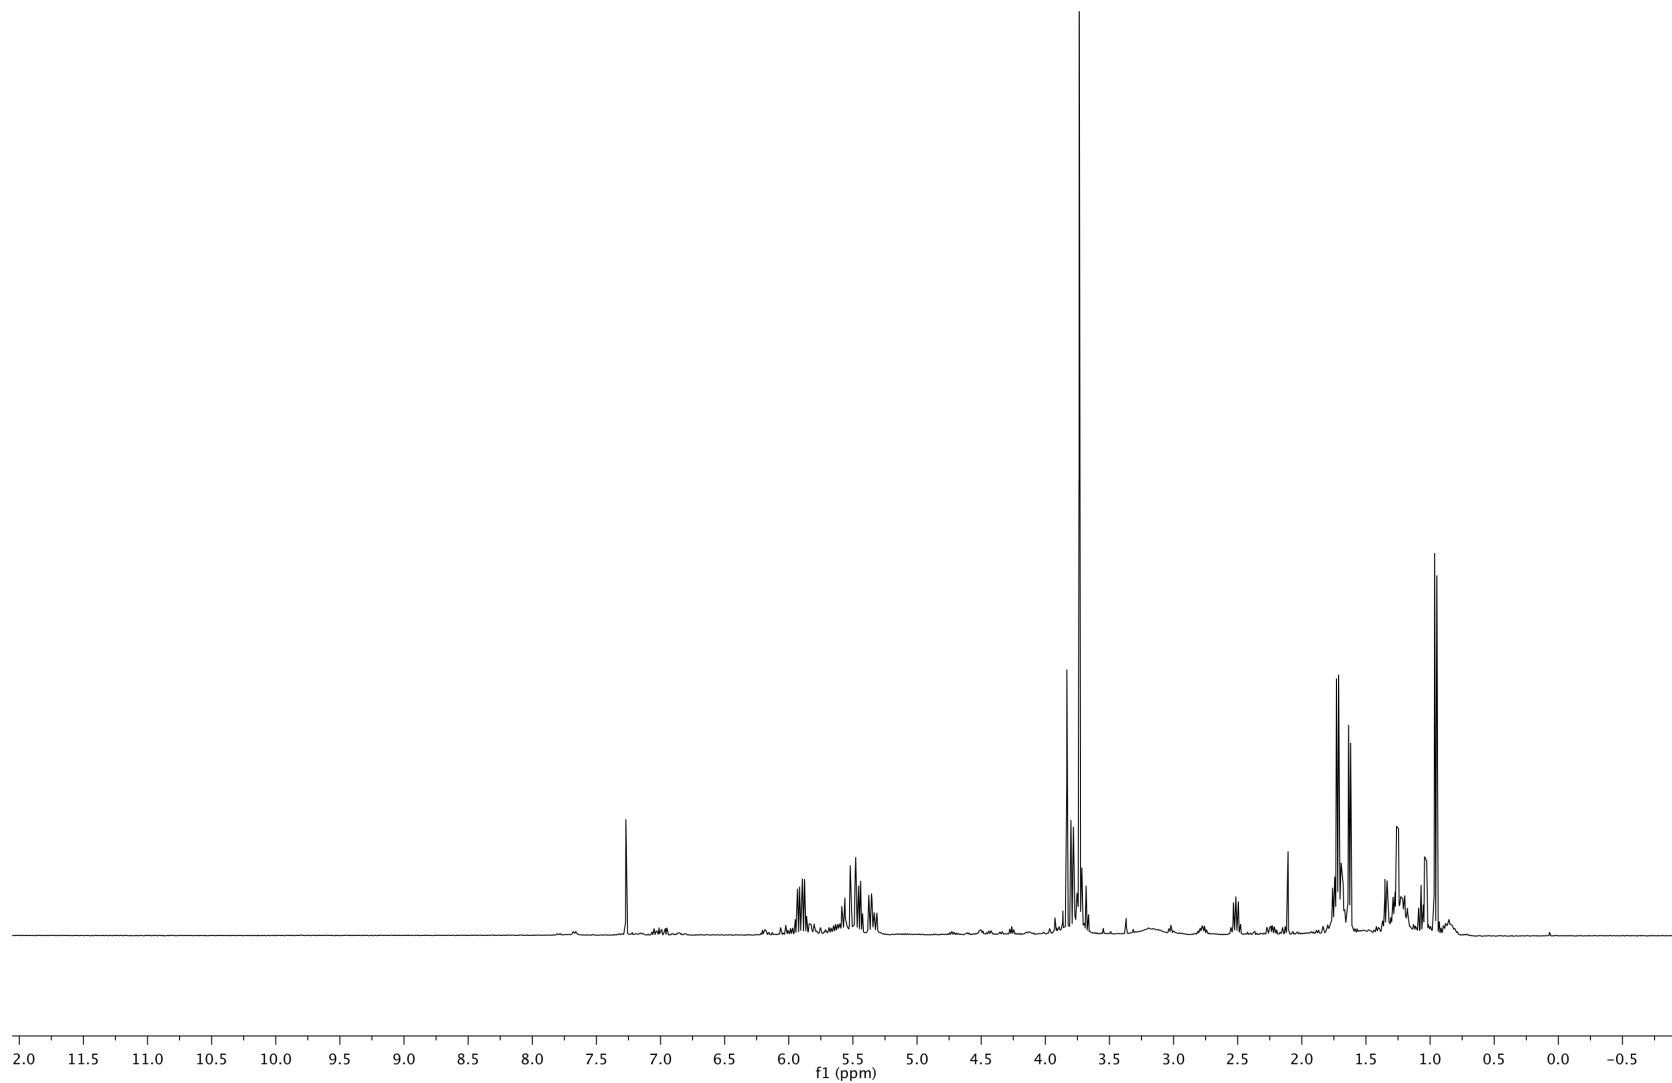

5f crude

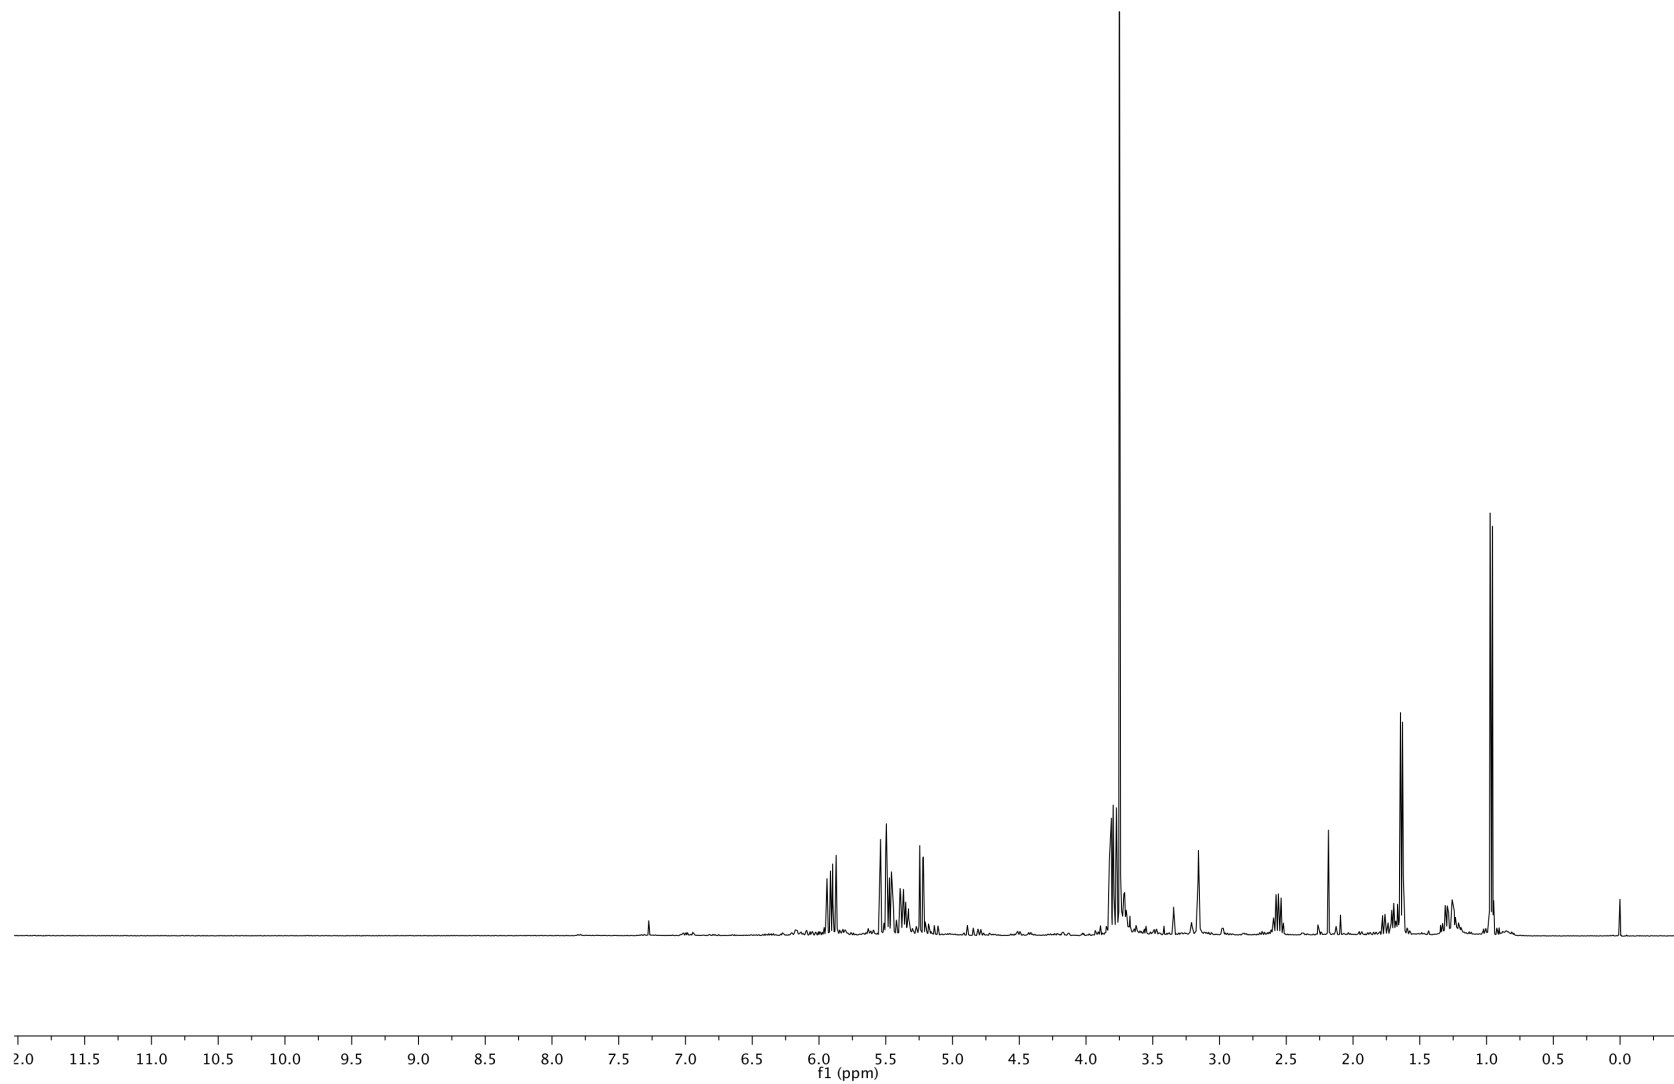

7a crude

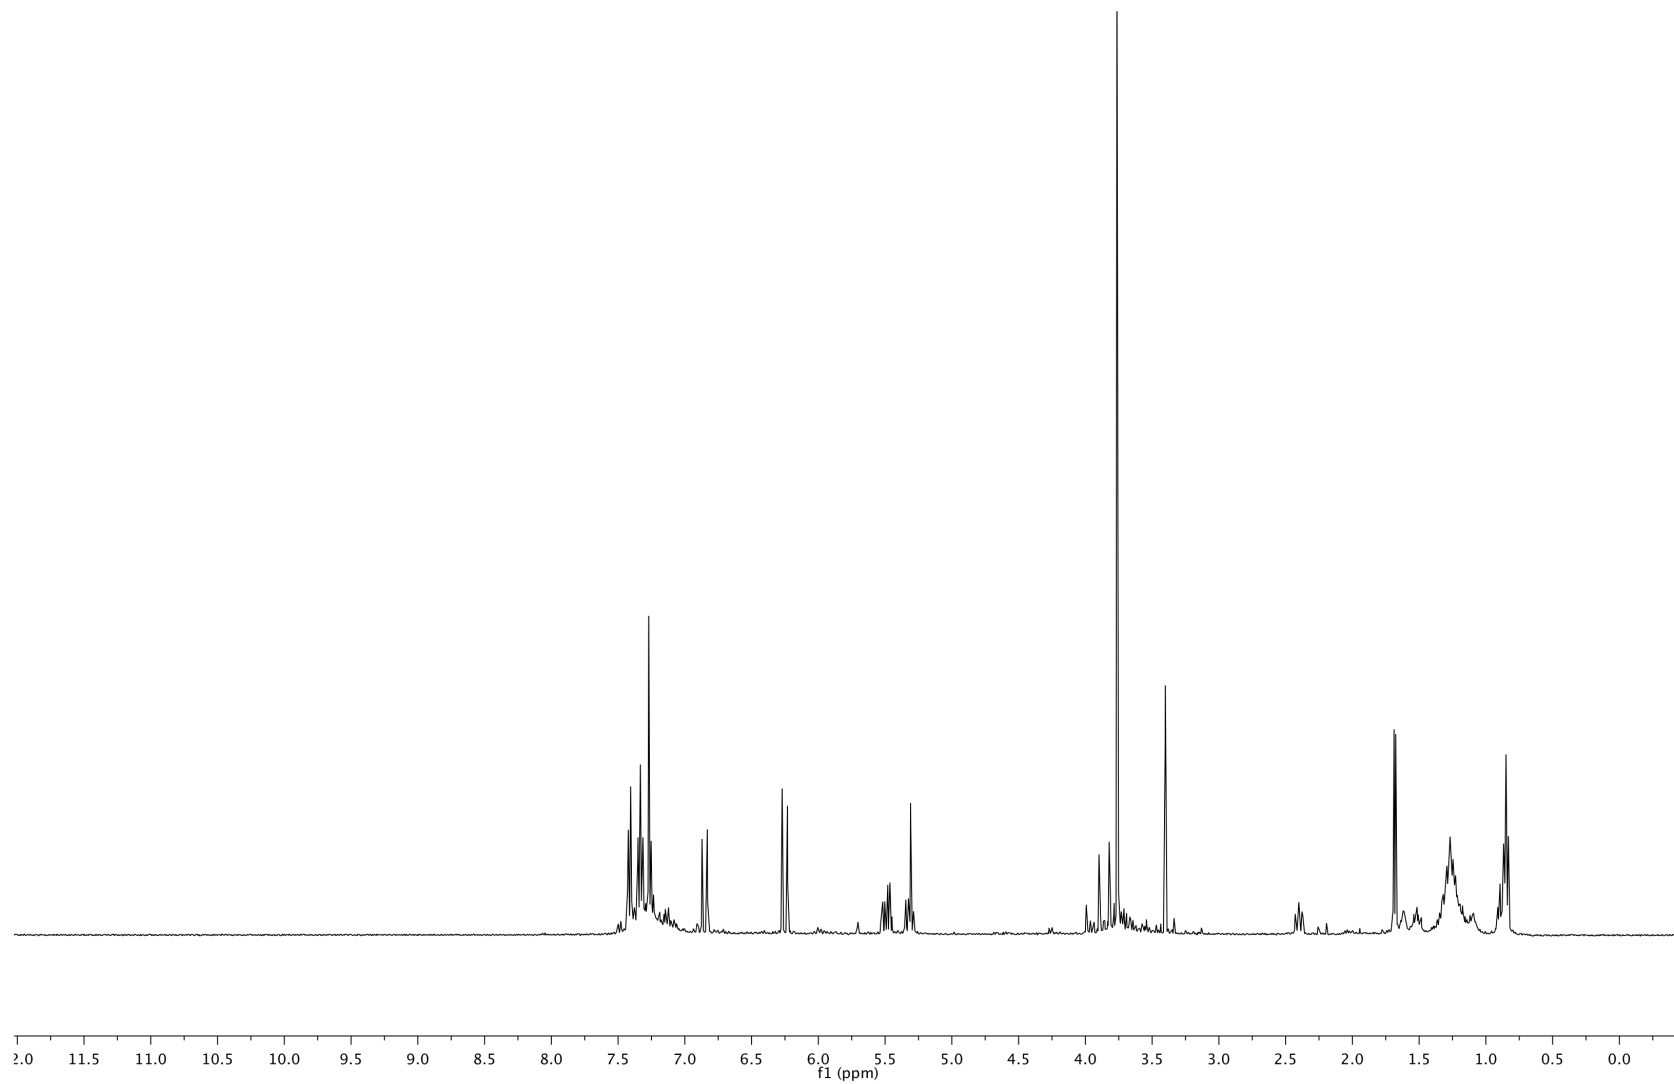

7b crude

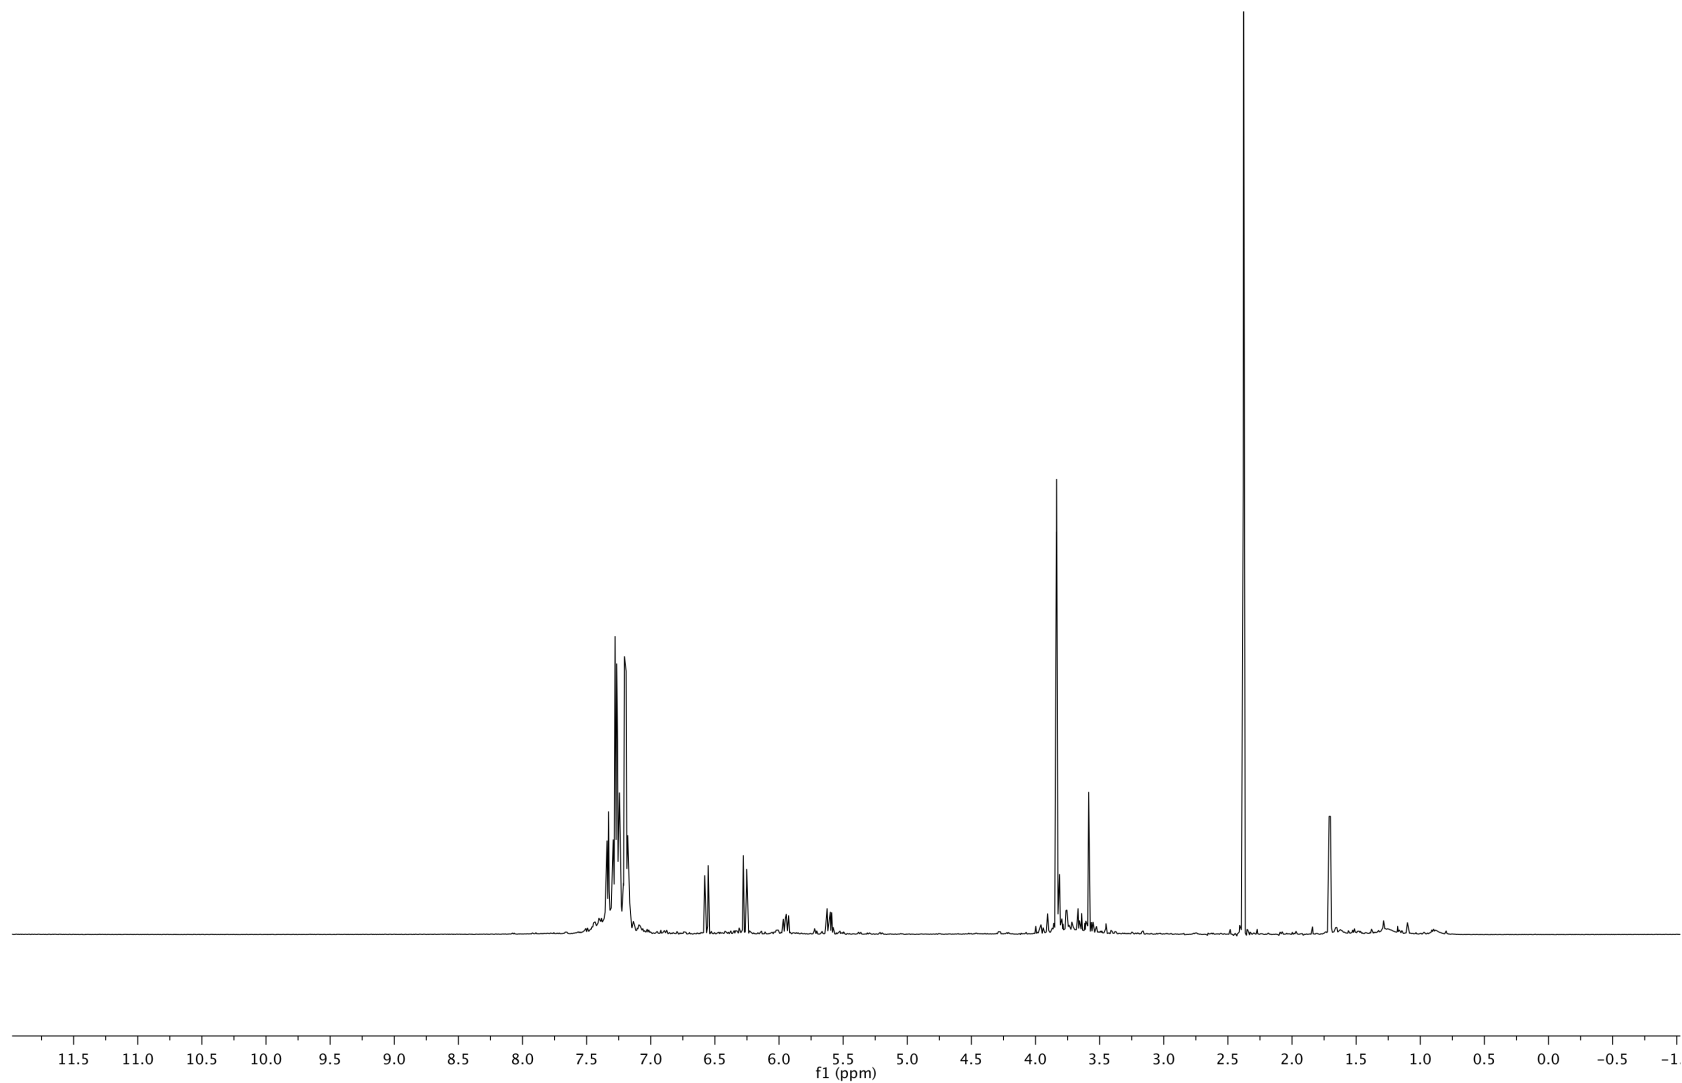

7c crude

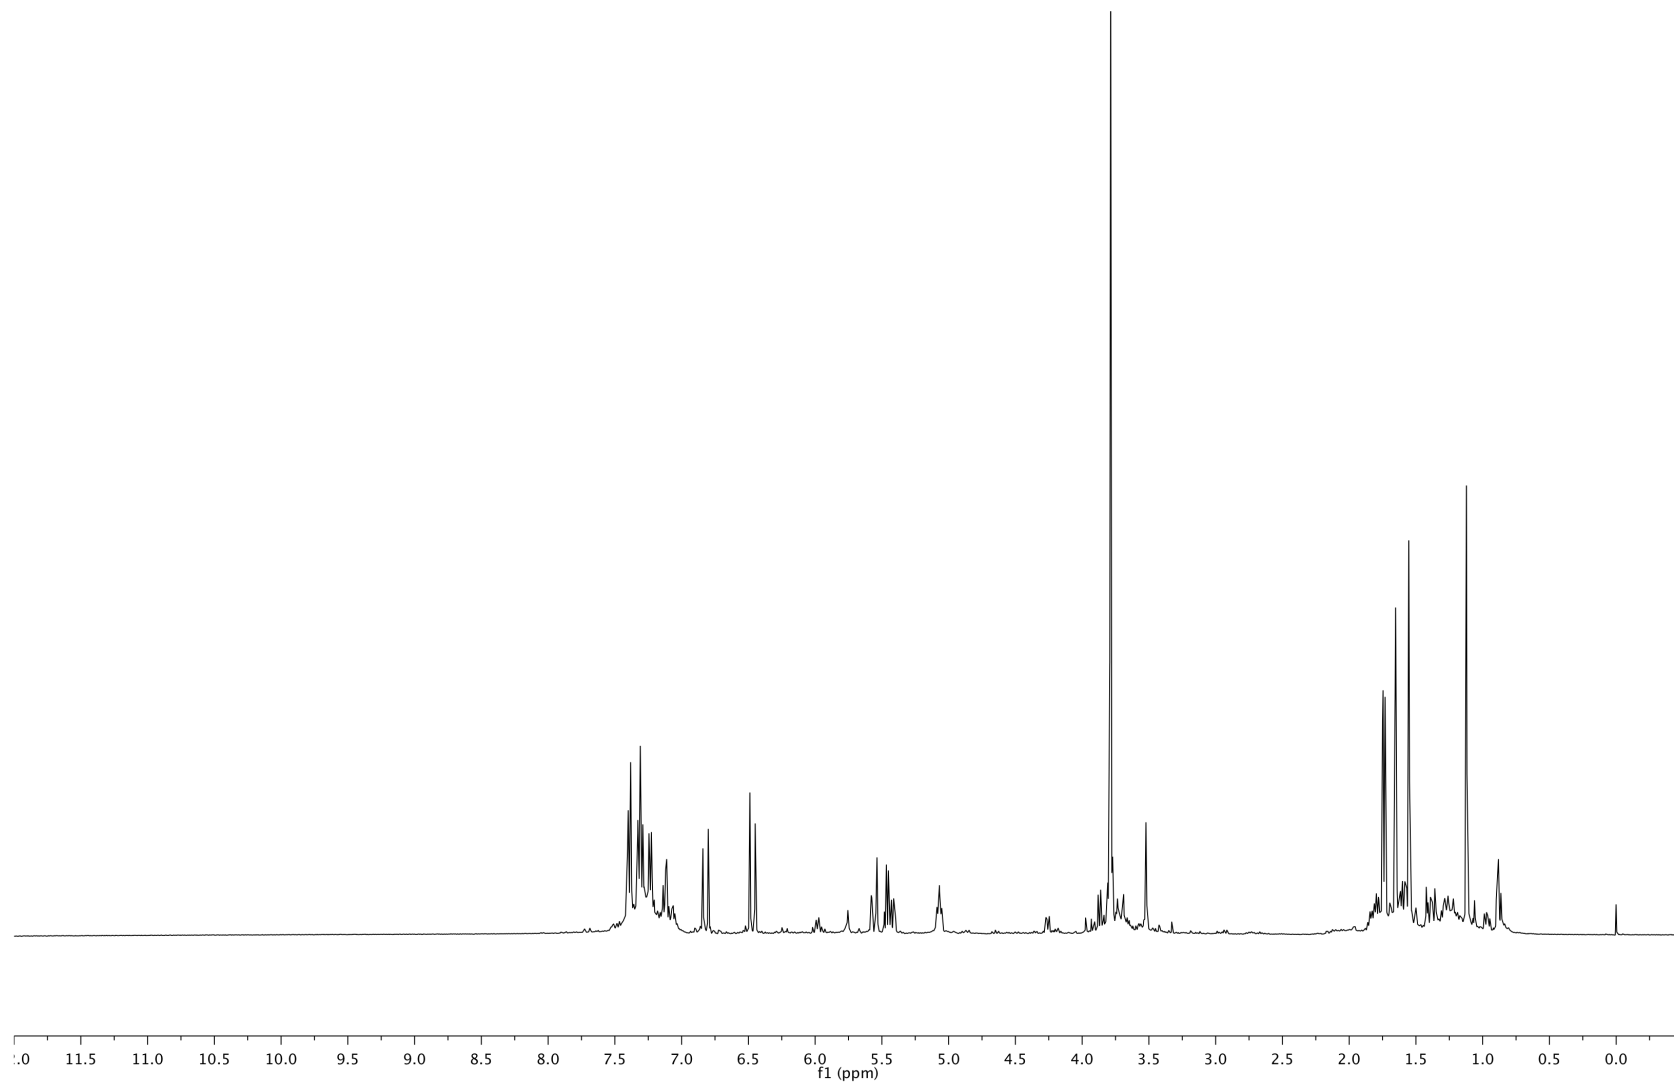

7d crude

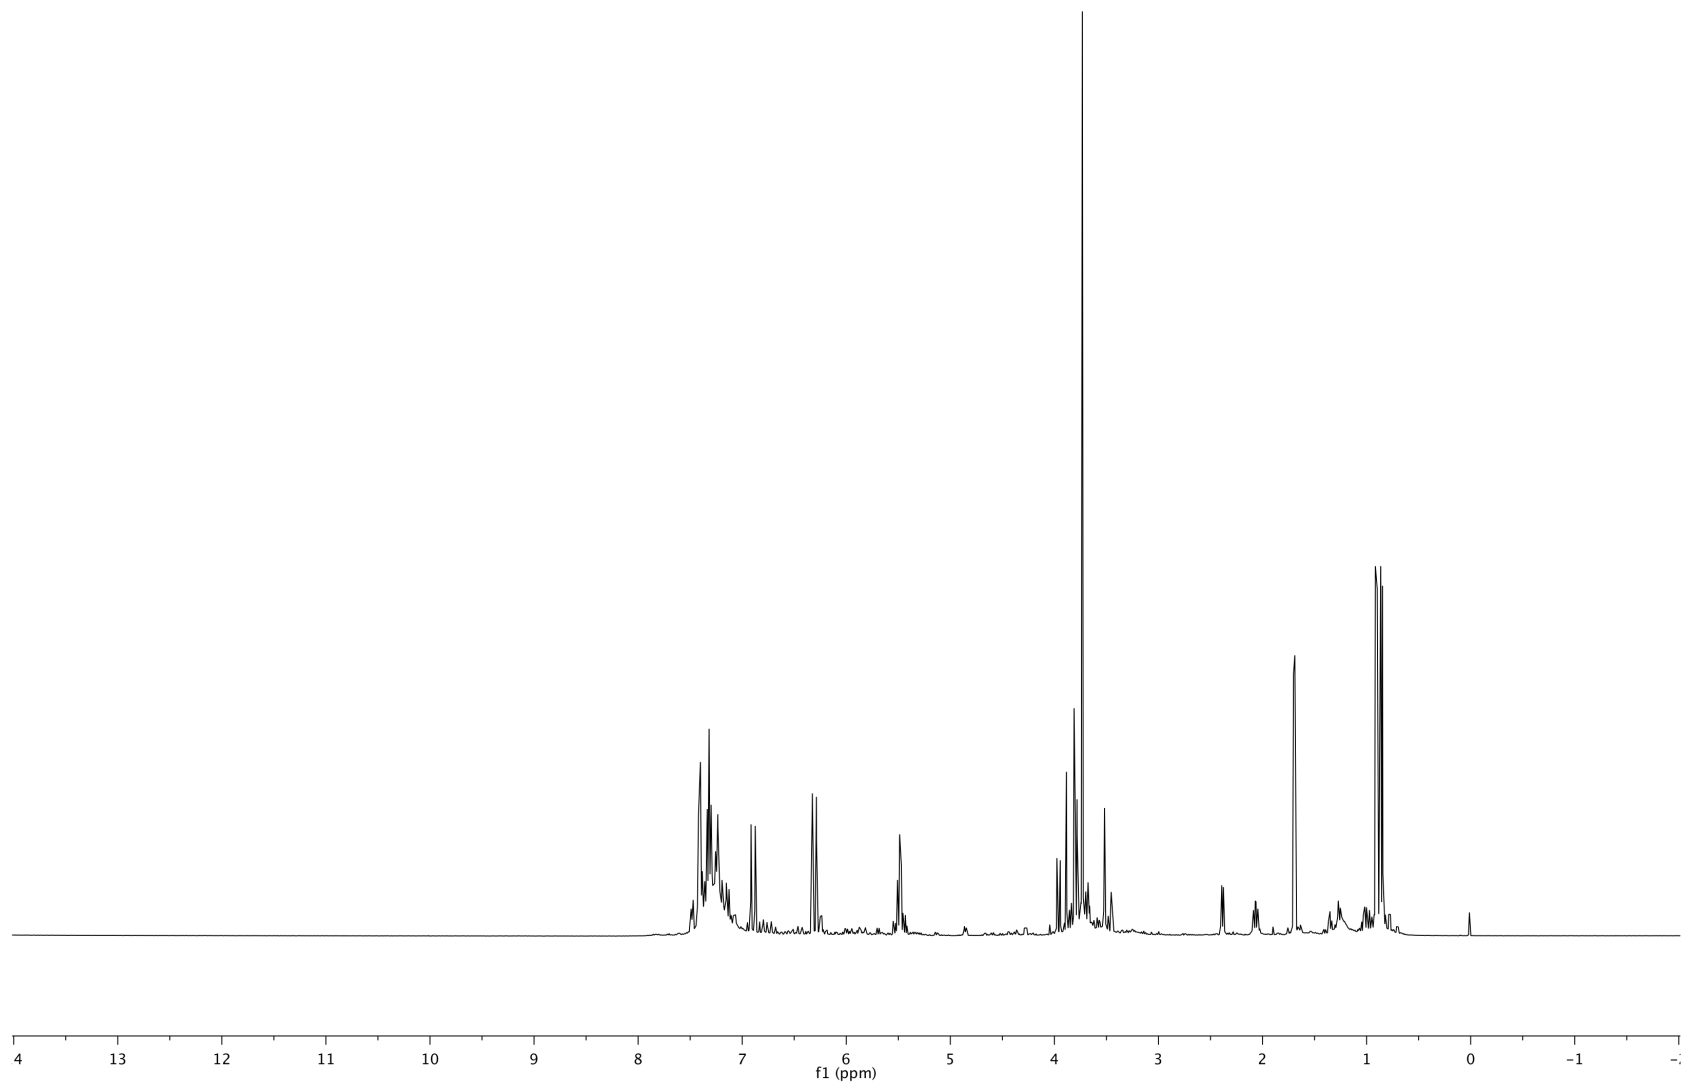

7e crude

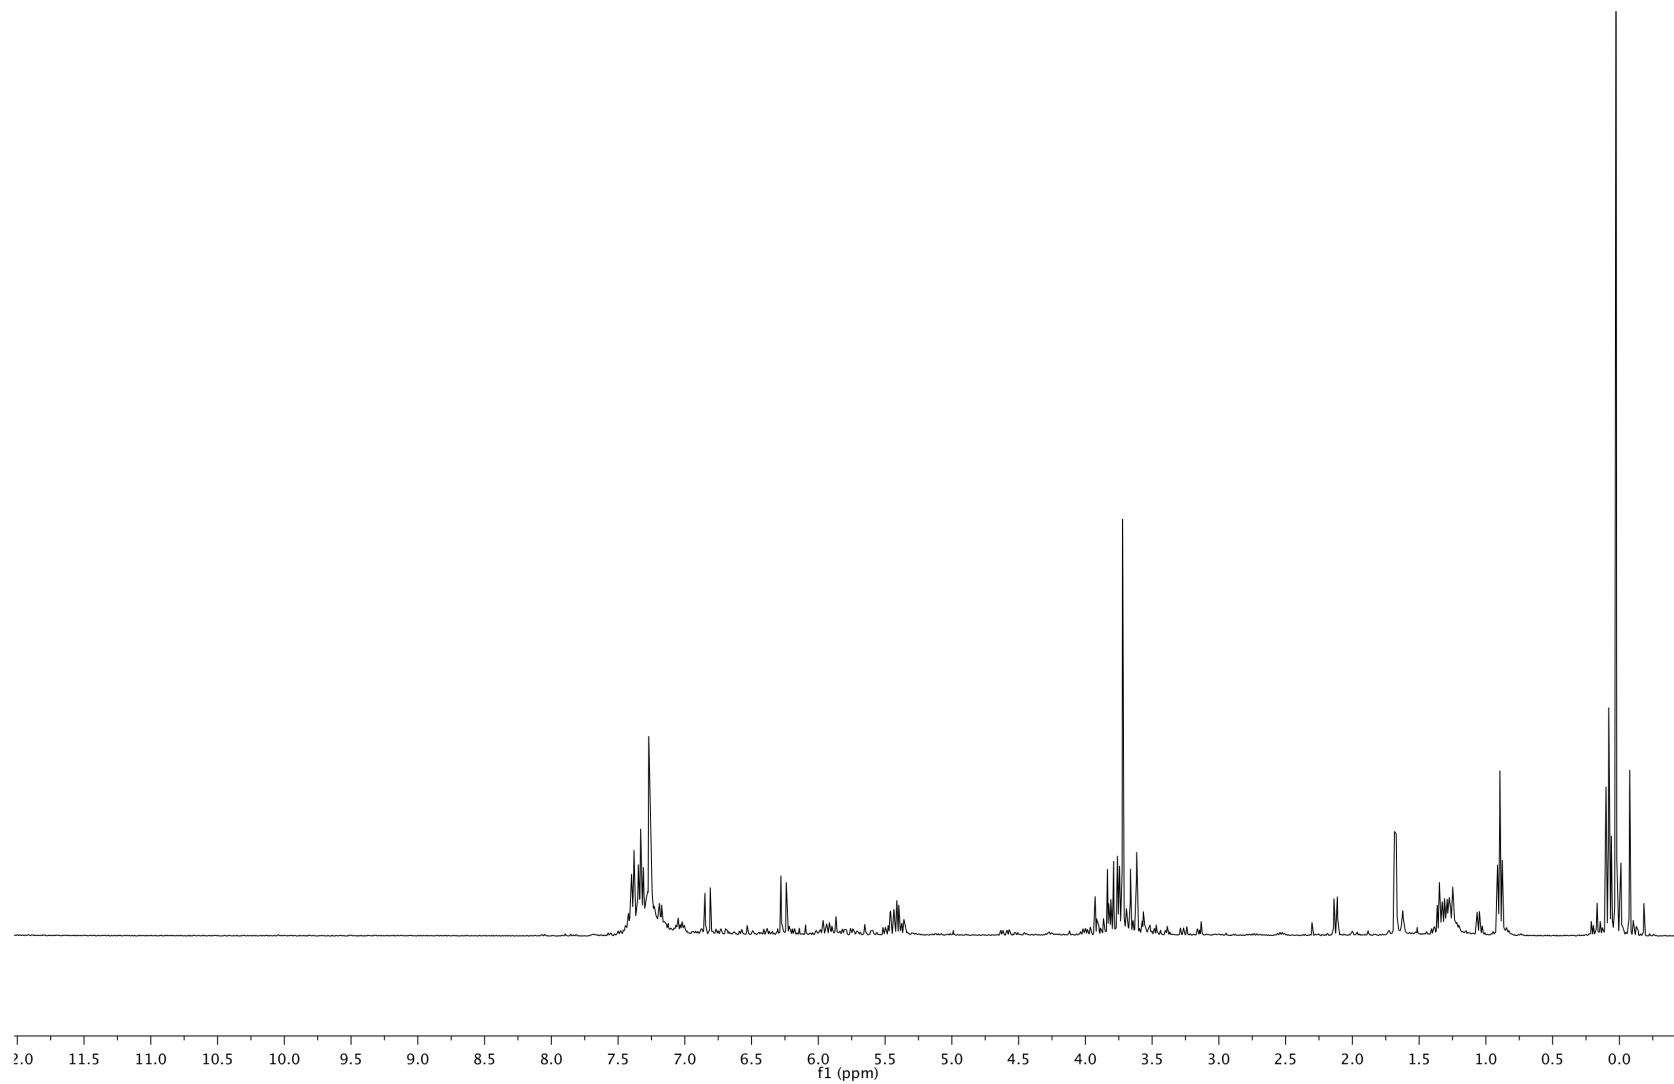

7f crude

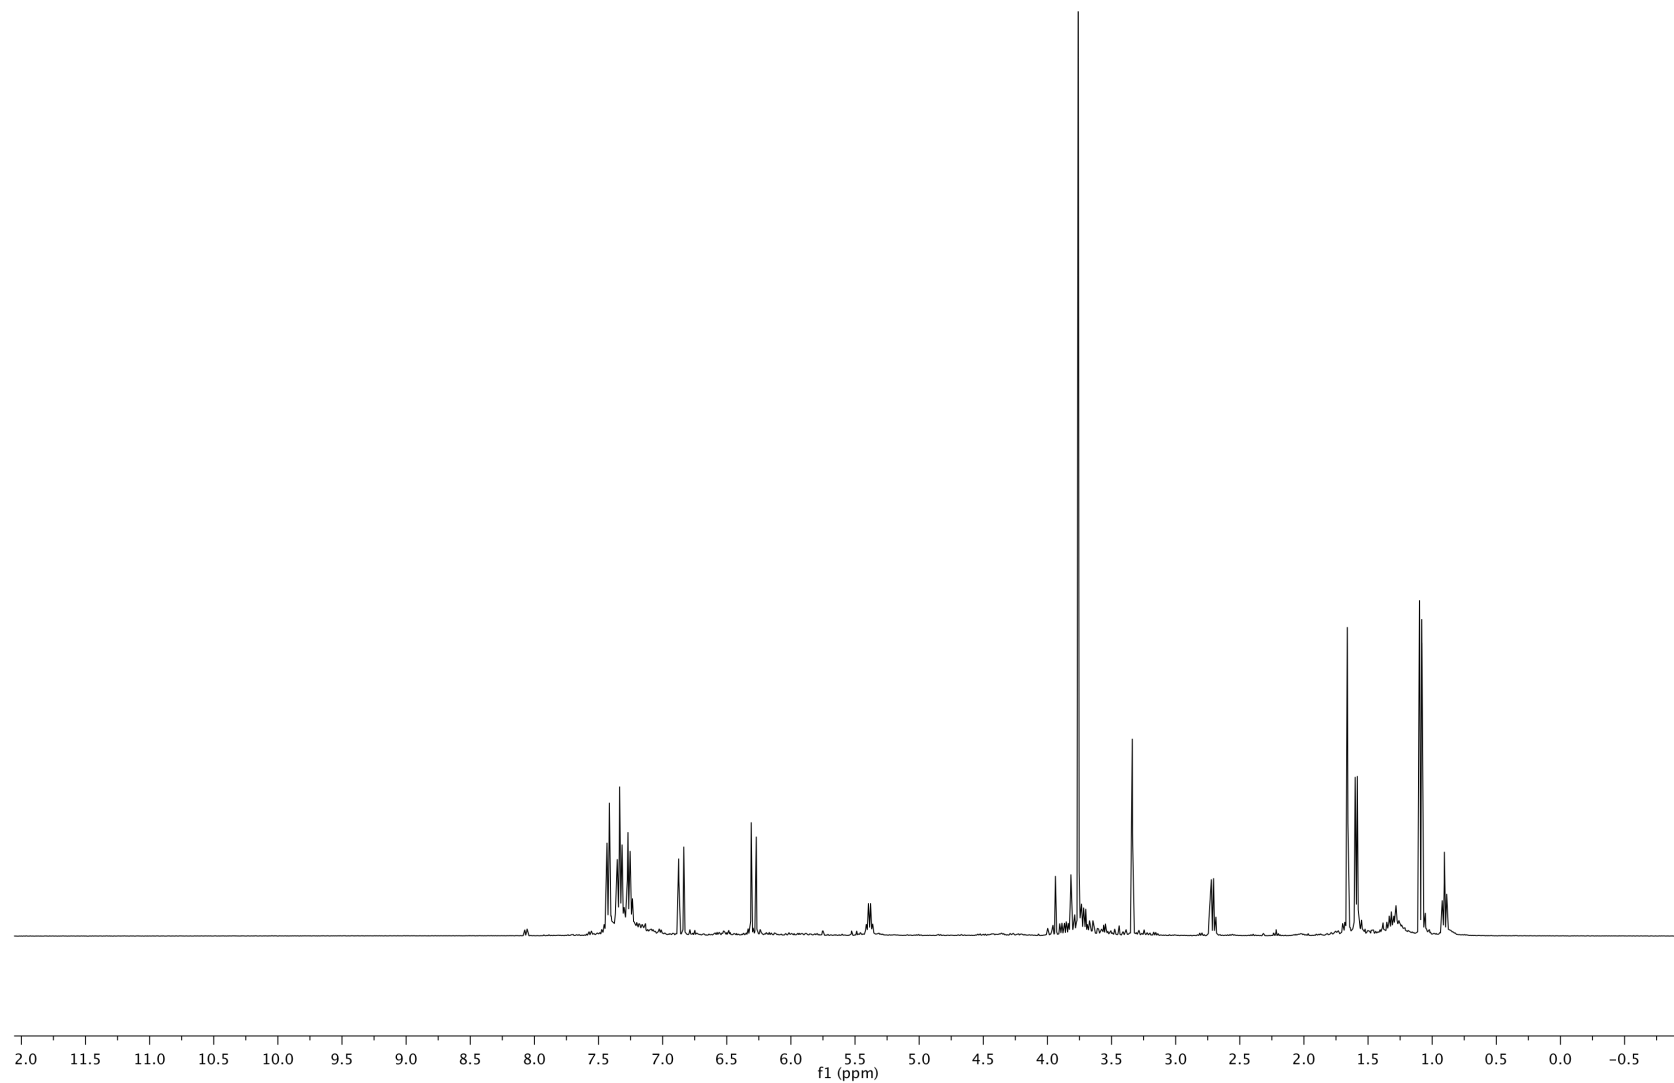



7g crude

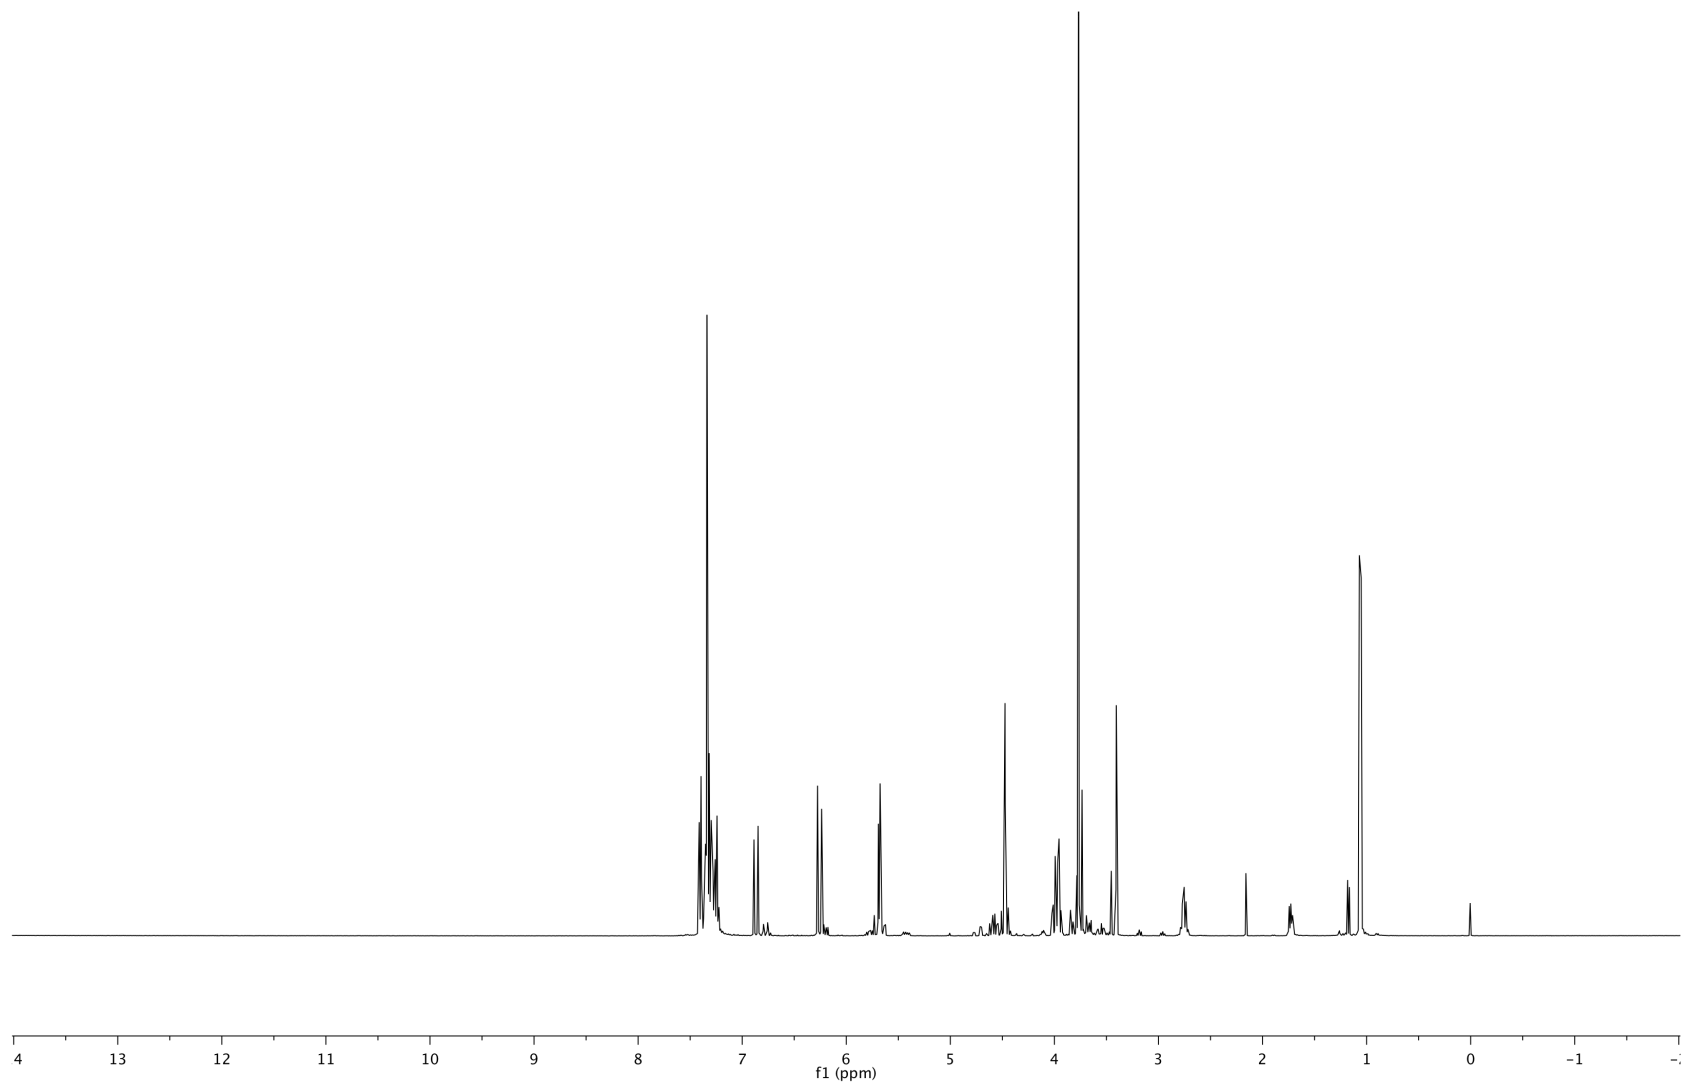

7h crude

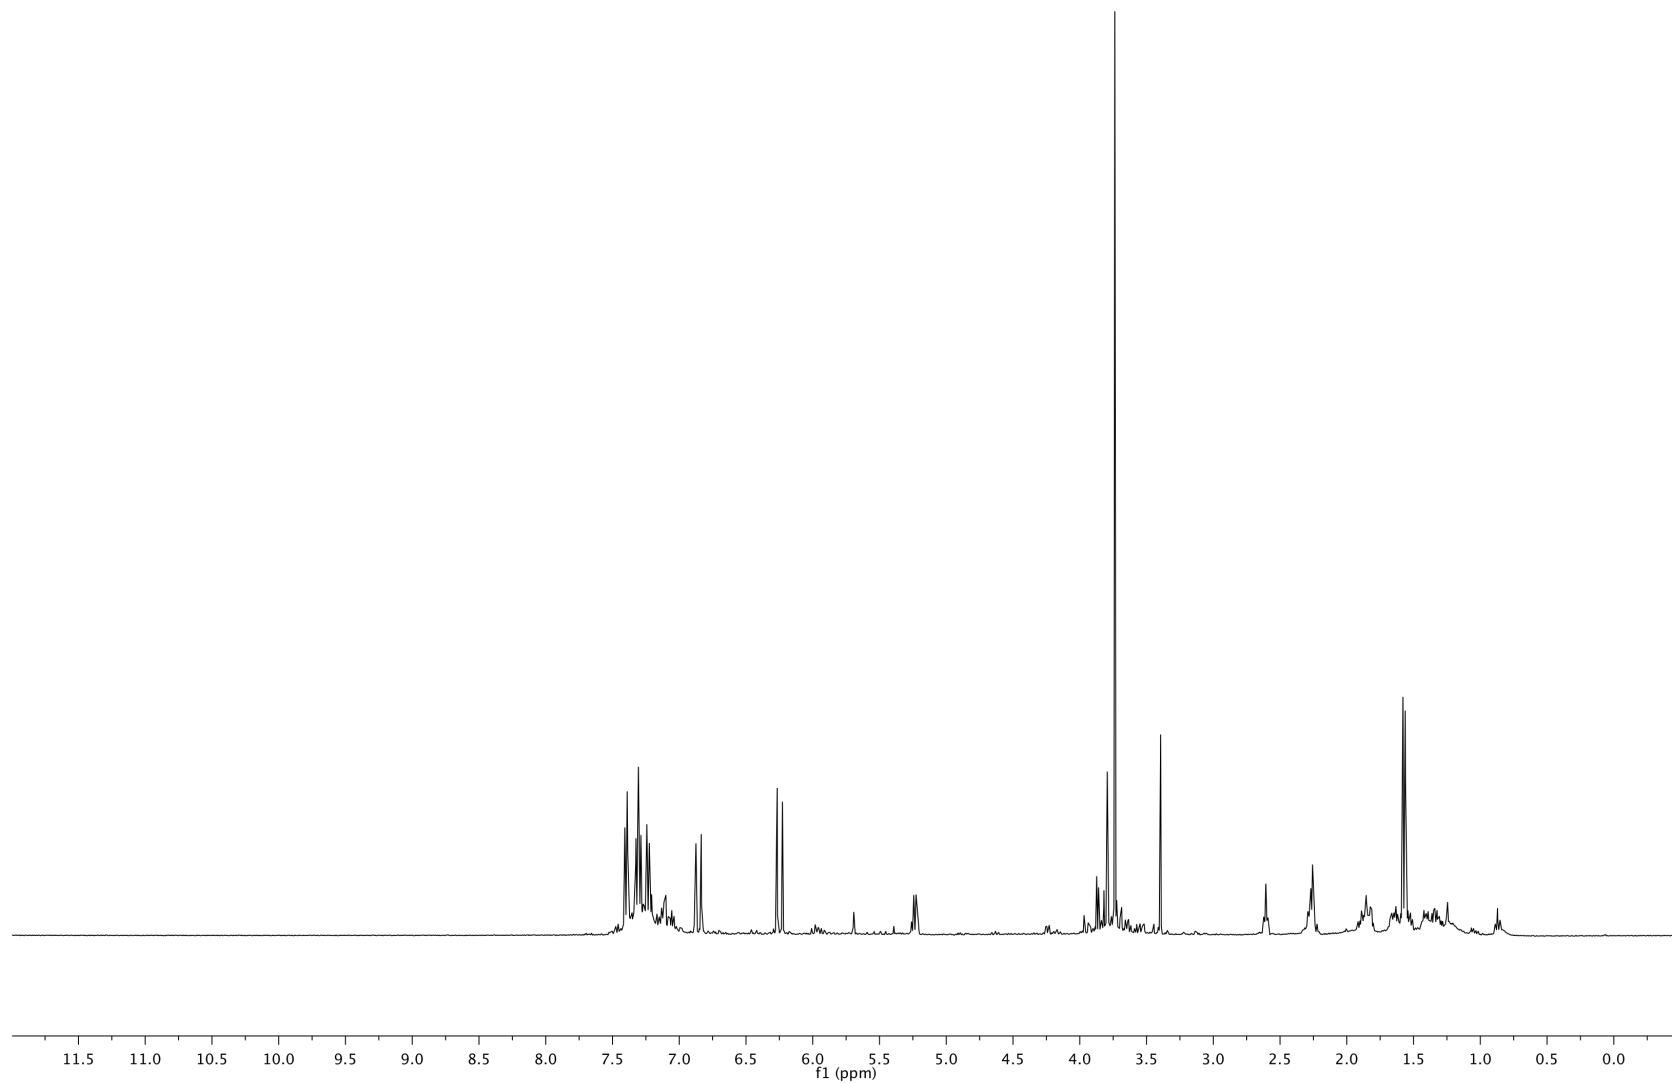

7i crude

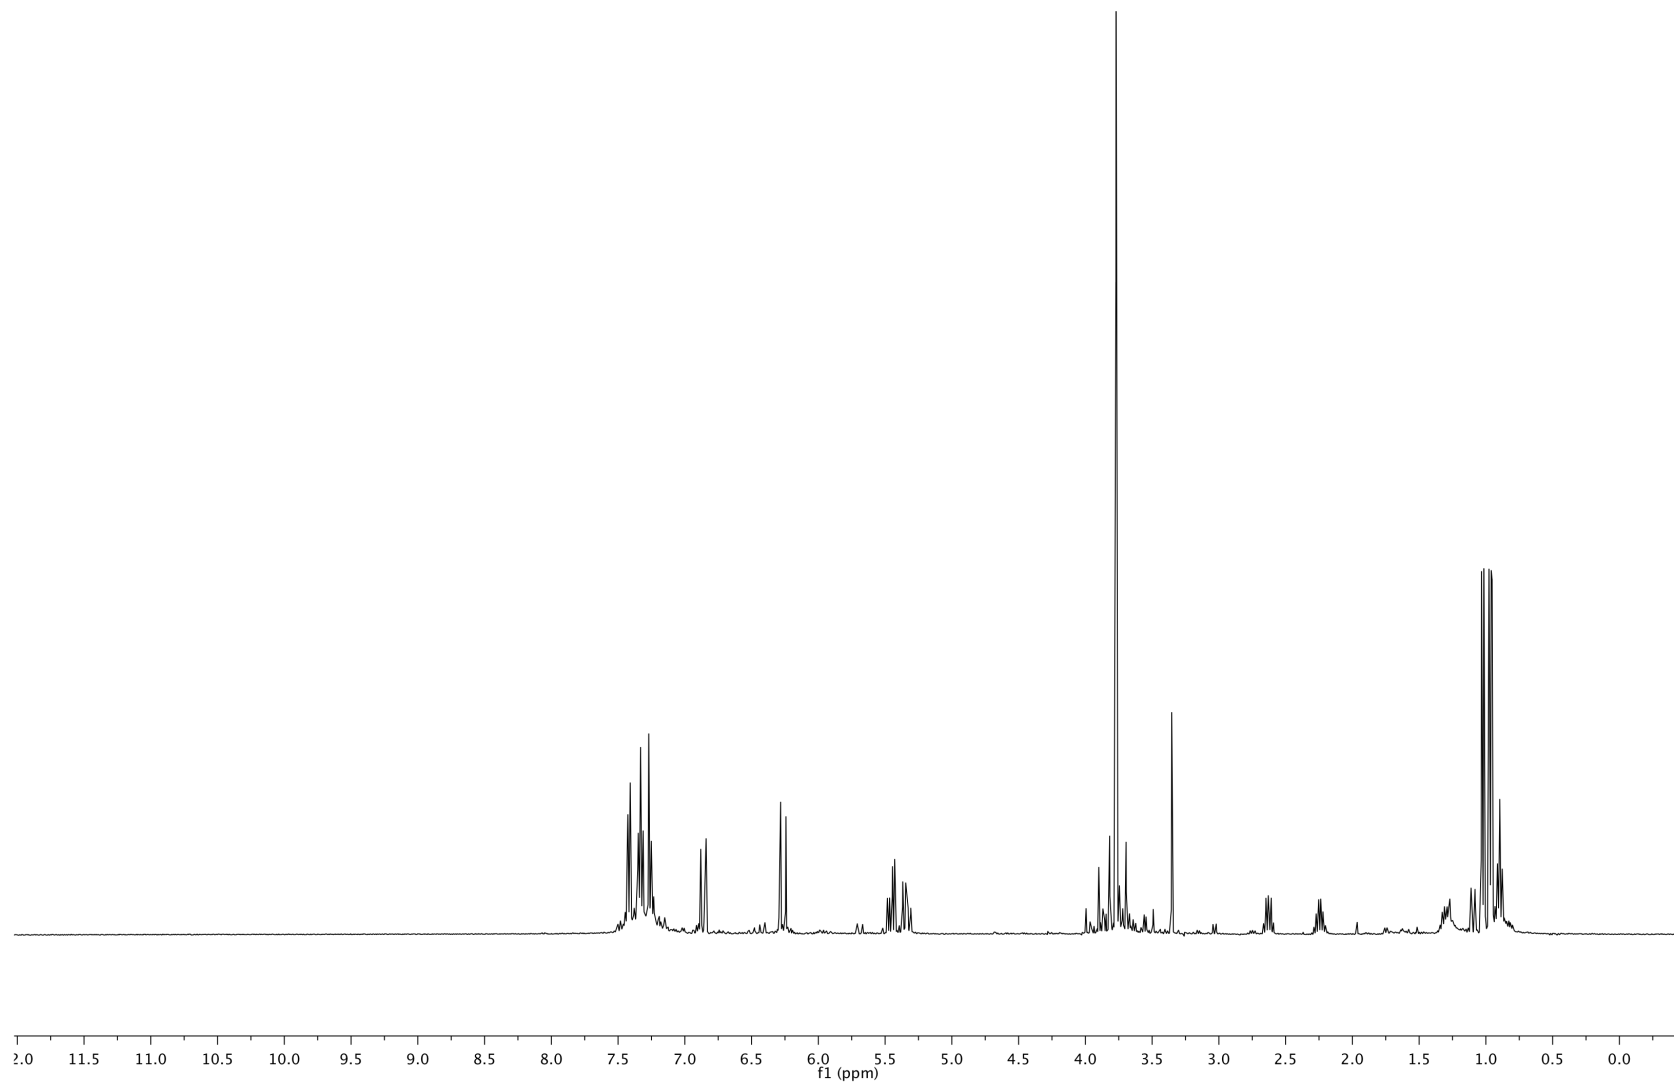

7j crude

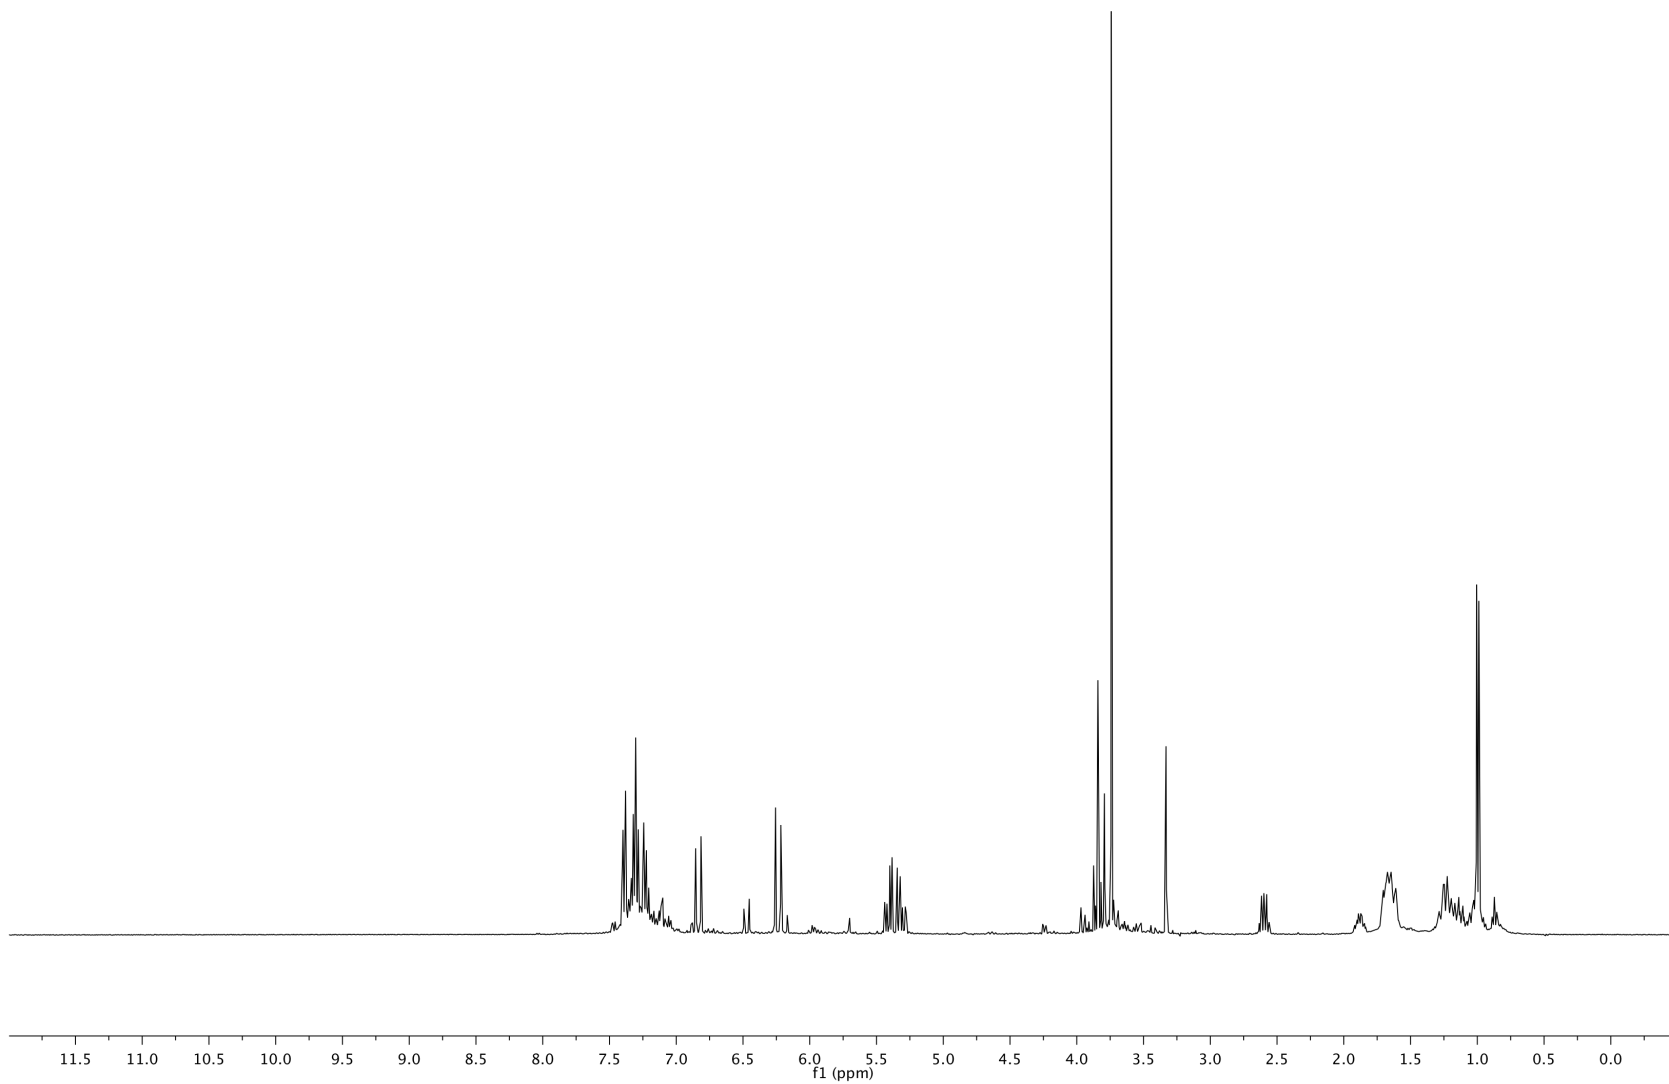

7k crude

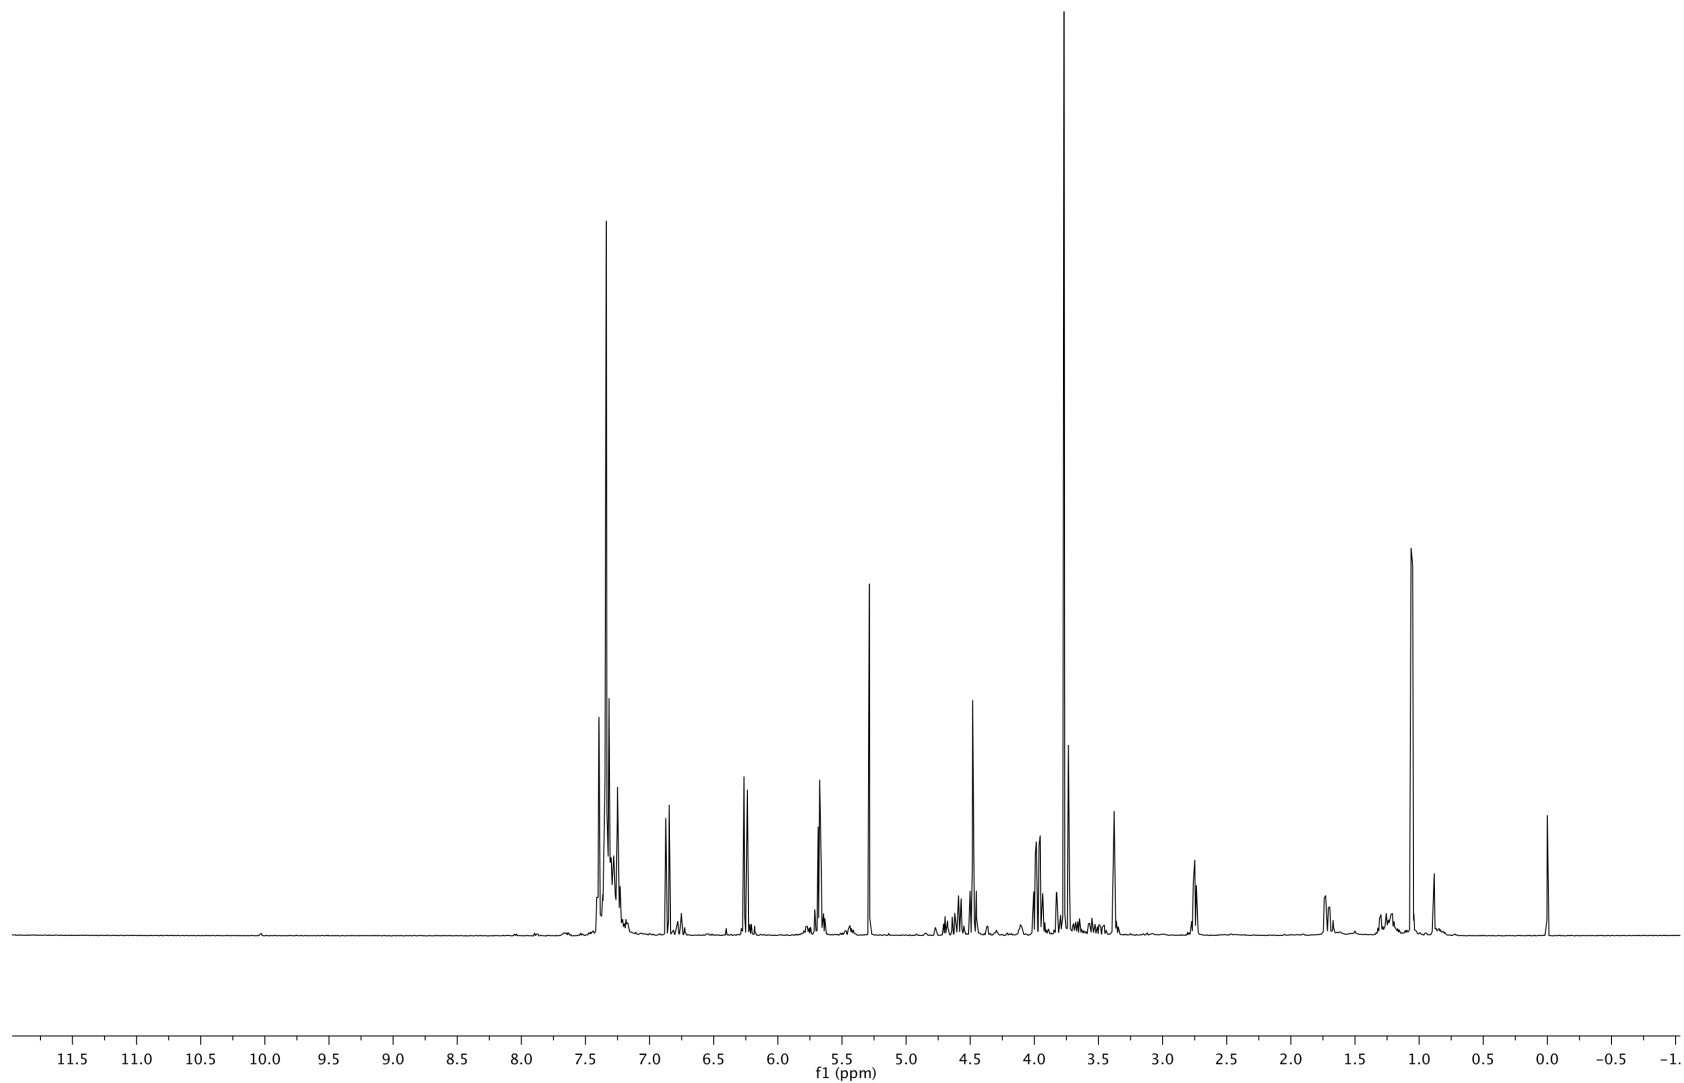

## 6. NMR Data for New Compounds

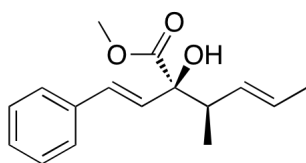

**(R,R)-3**  
**400 MHz**  
**CDCl<sub>3</sub>**

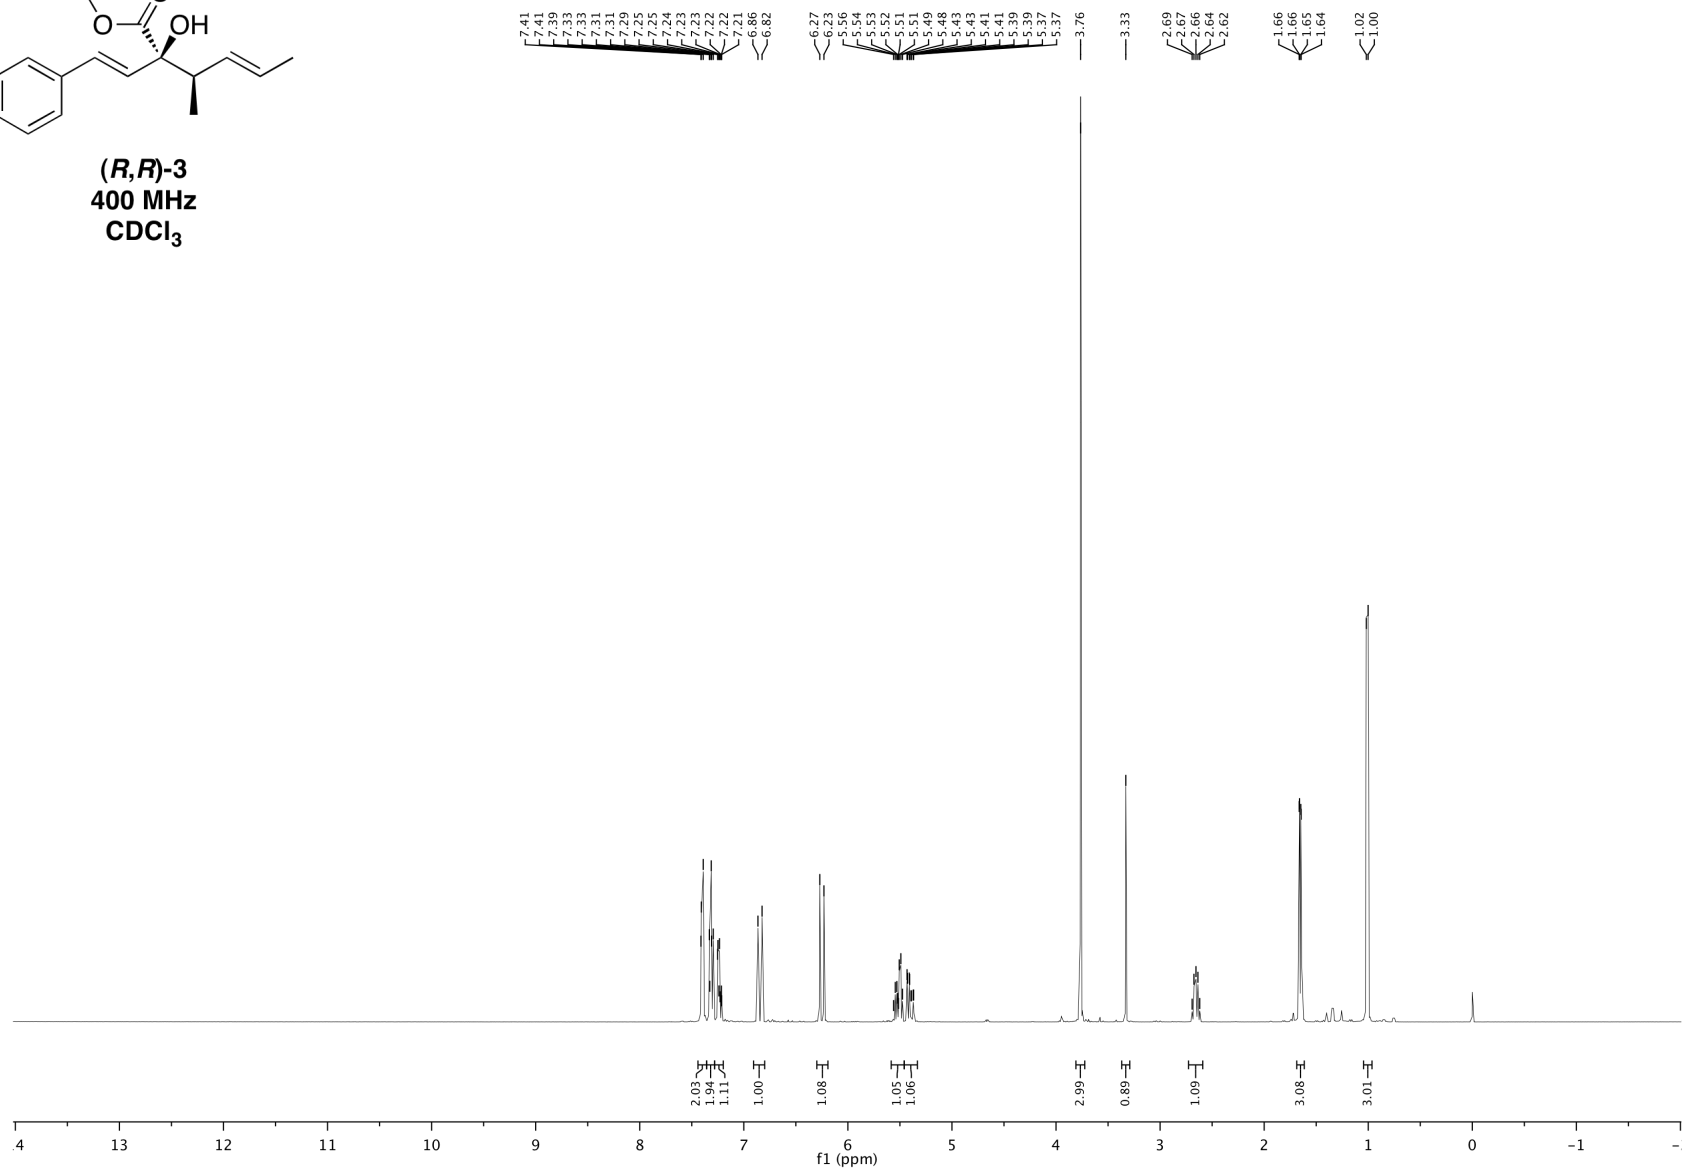

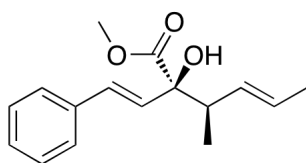

**(R,R)-3**  
100 MHz  
CDCl<sub>3</sub>

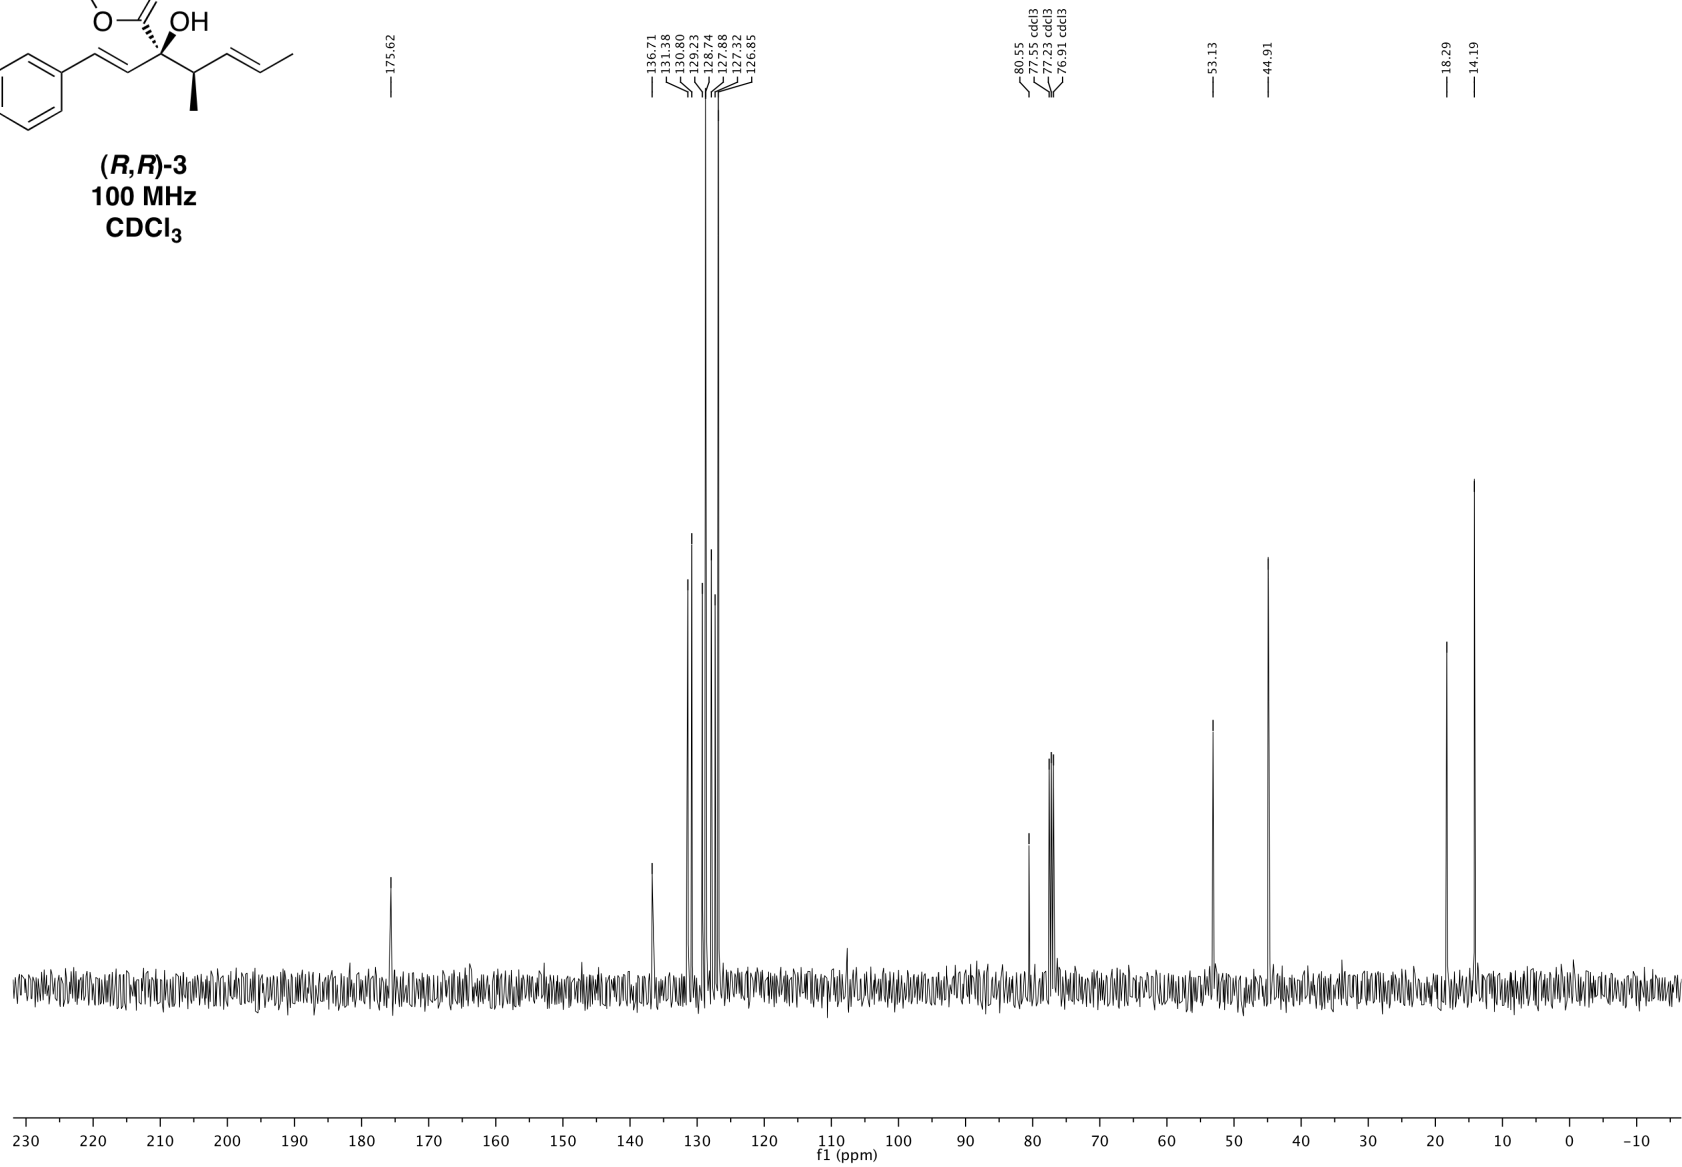



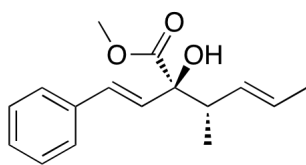

(R,S)-3  
400 MHz  
CDCl<sub>3</sub>

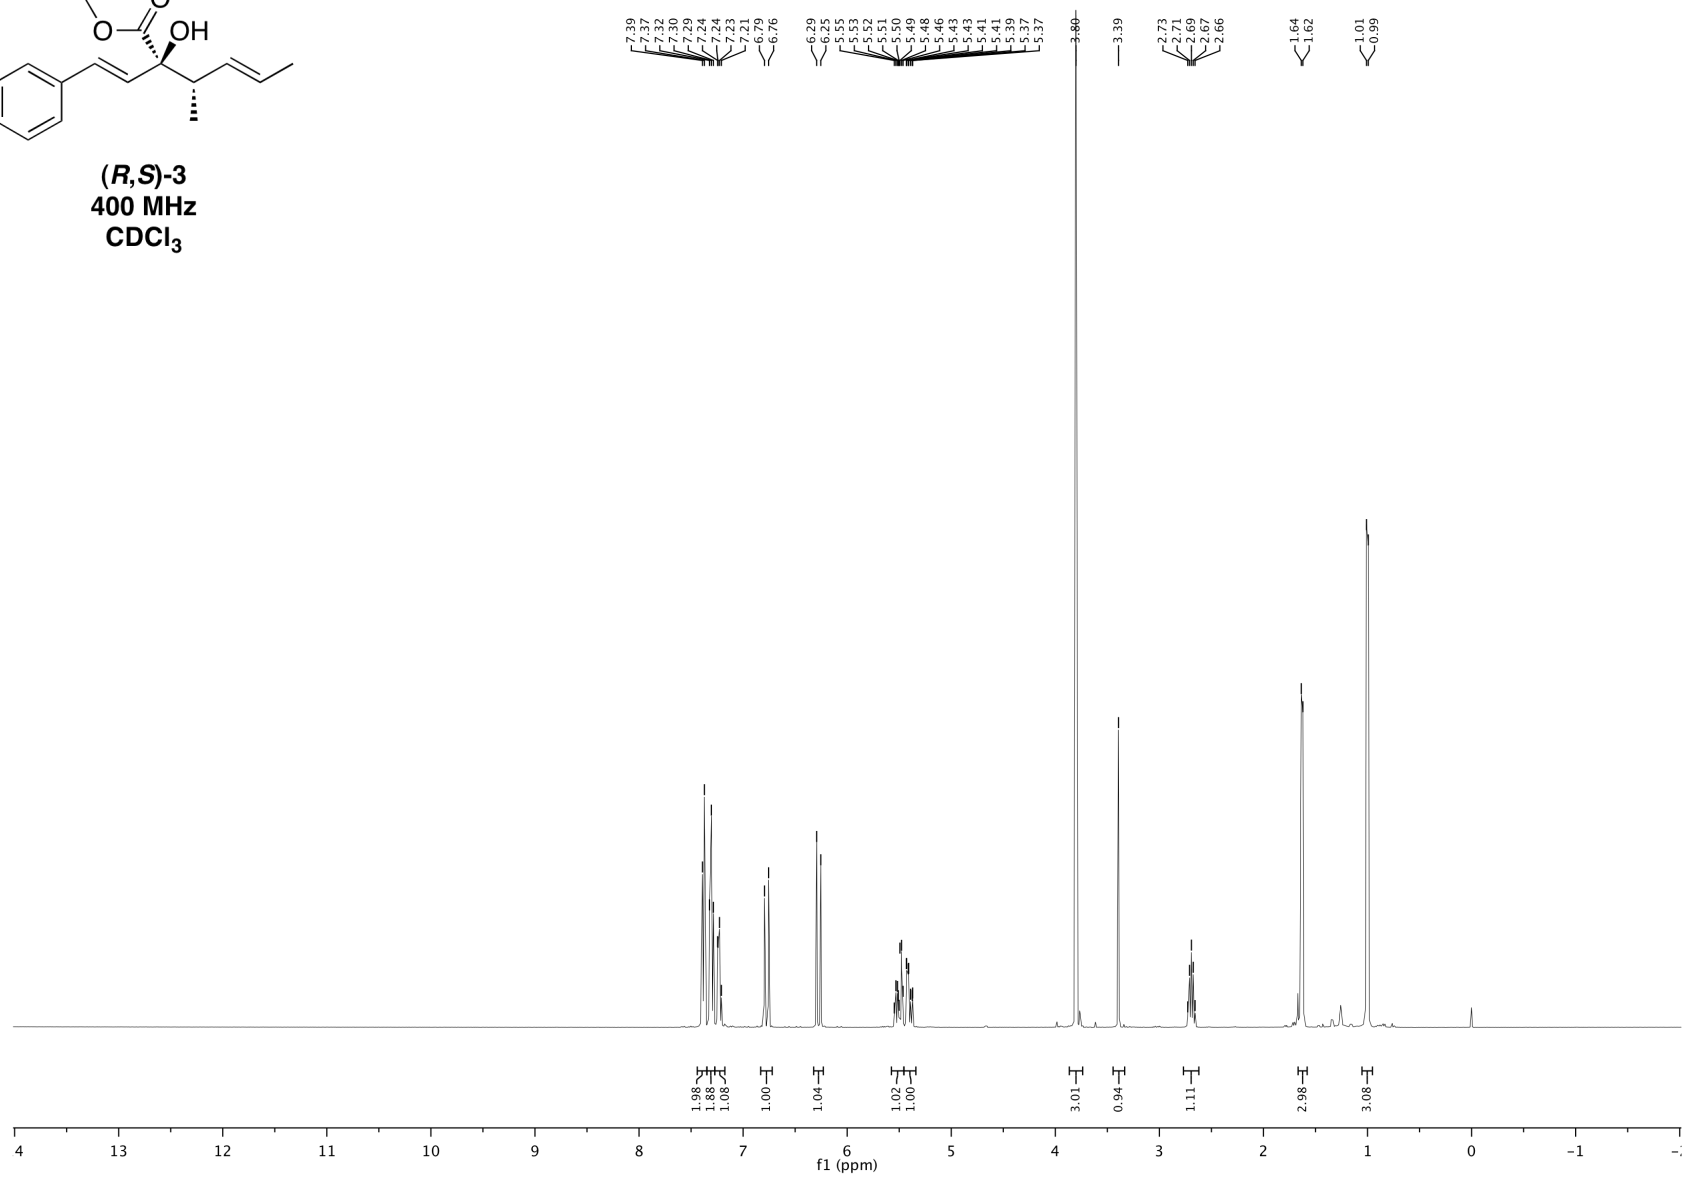

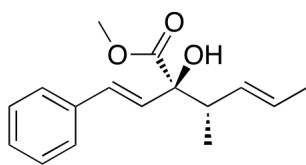

(R,S)-3  
100 MHz  
CDCl<sub>3</sub>

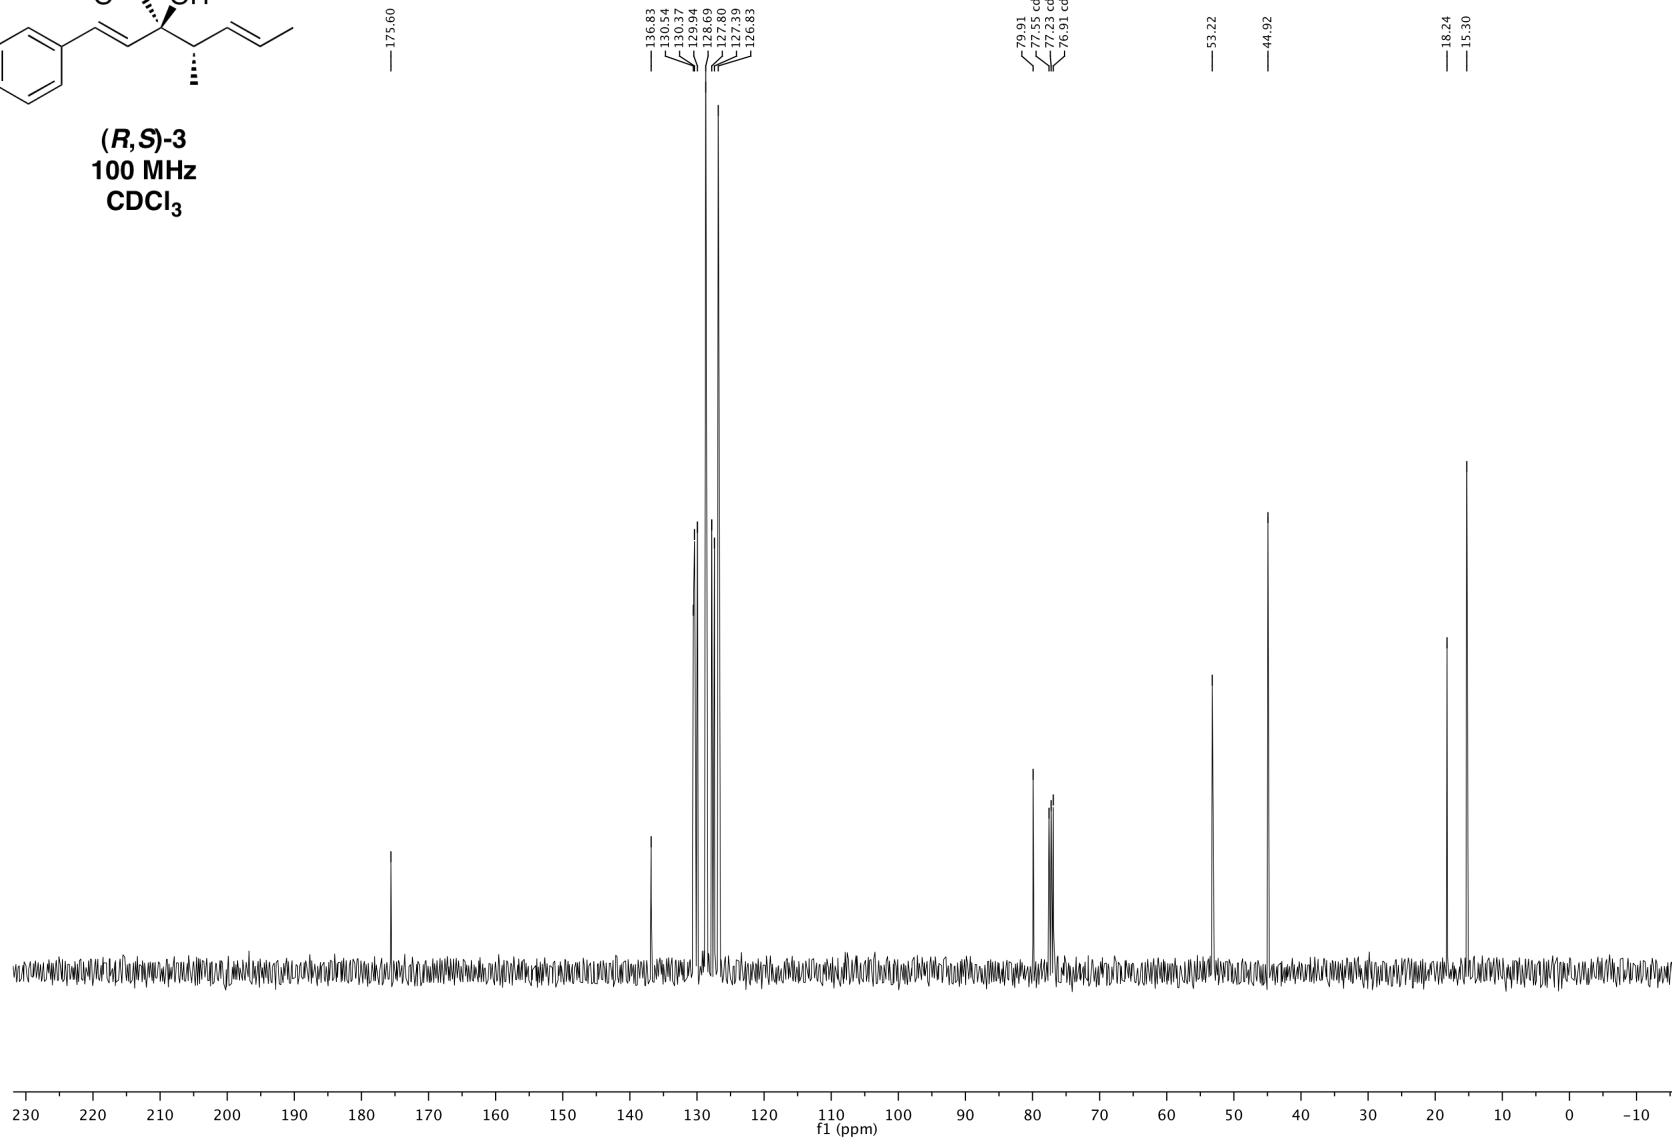

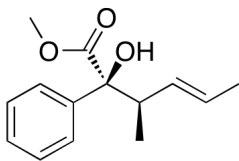

**5a**  
400 MHz  
CDCl<sub>3</sub>

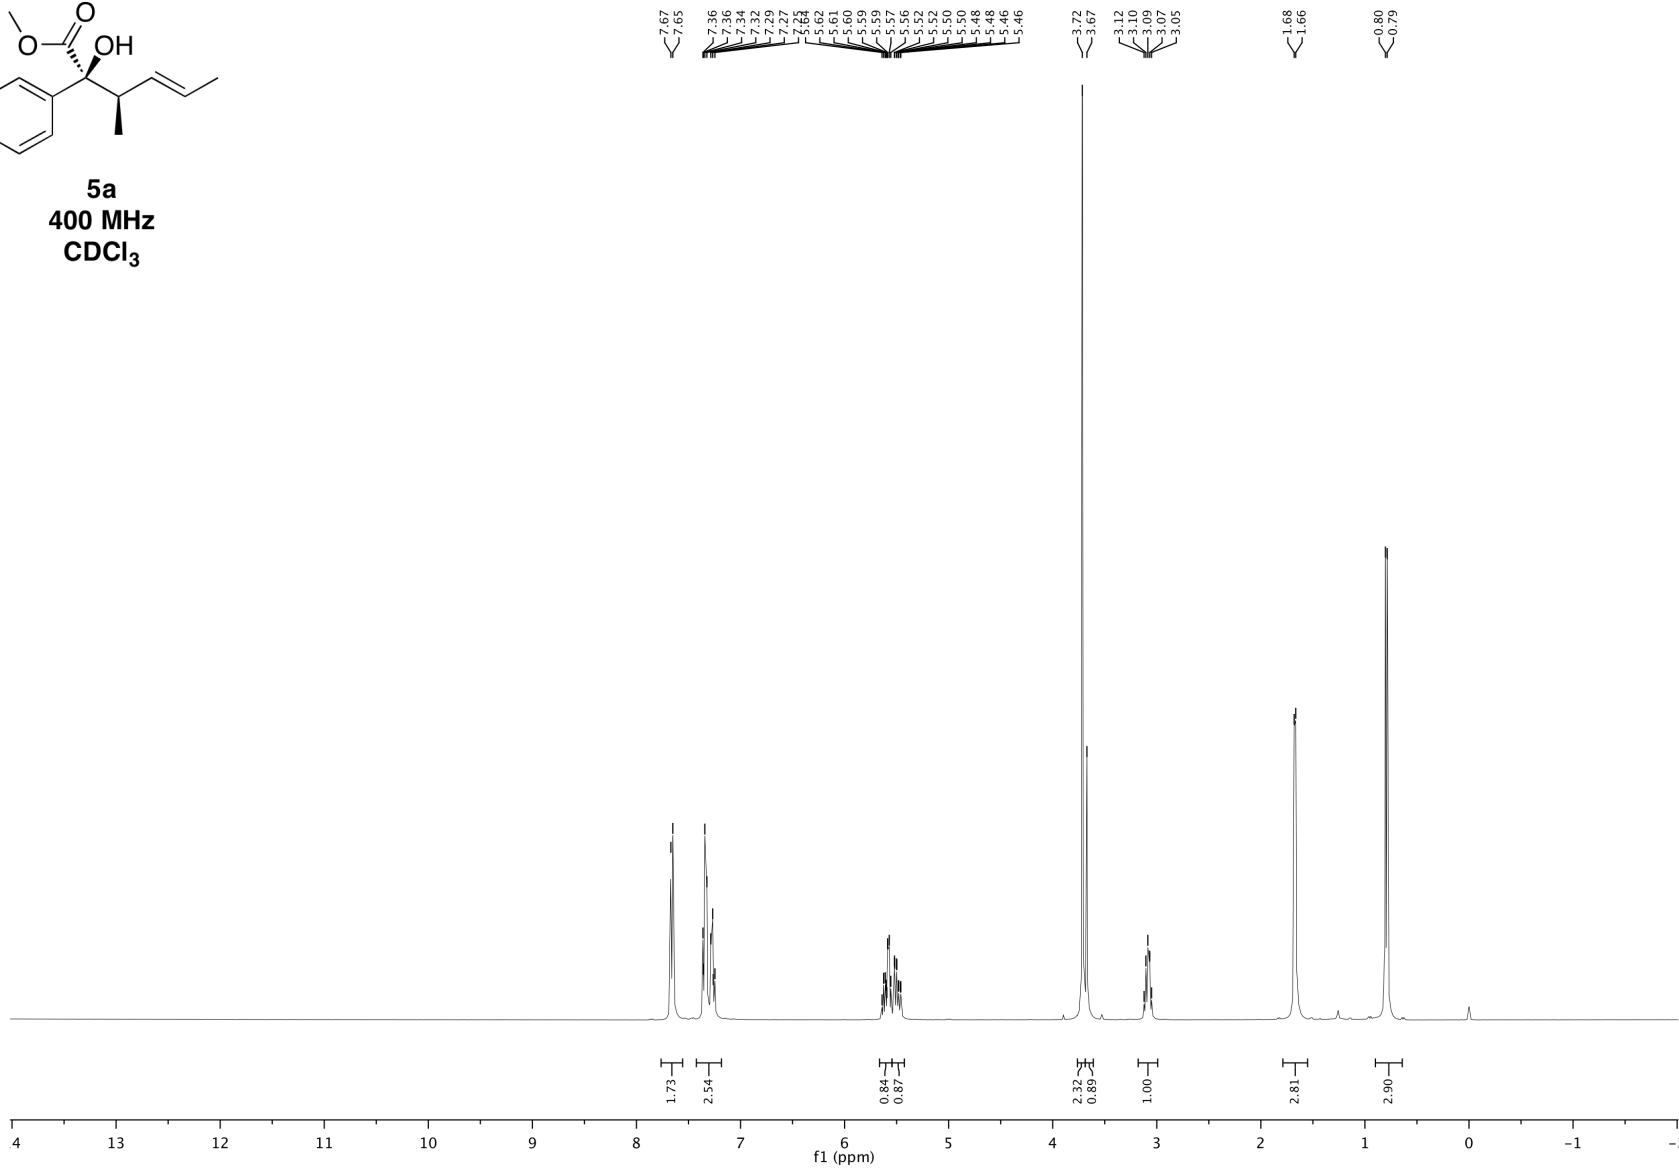

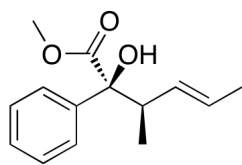

**5a**  
100 MHz  
CDCl<sub>3</sub>

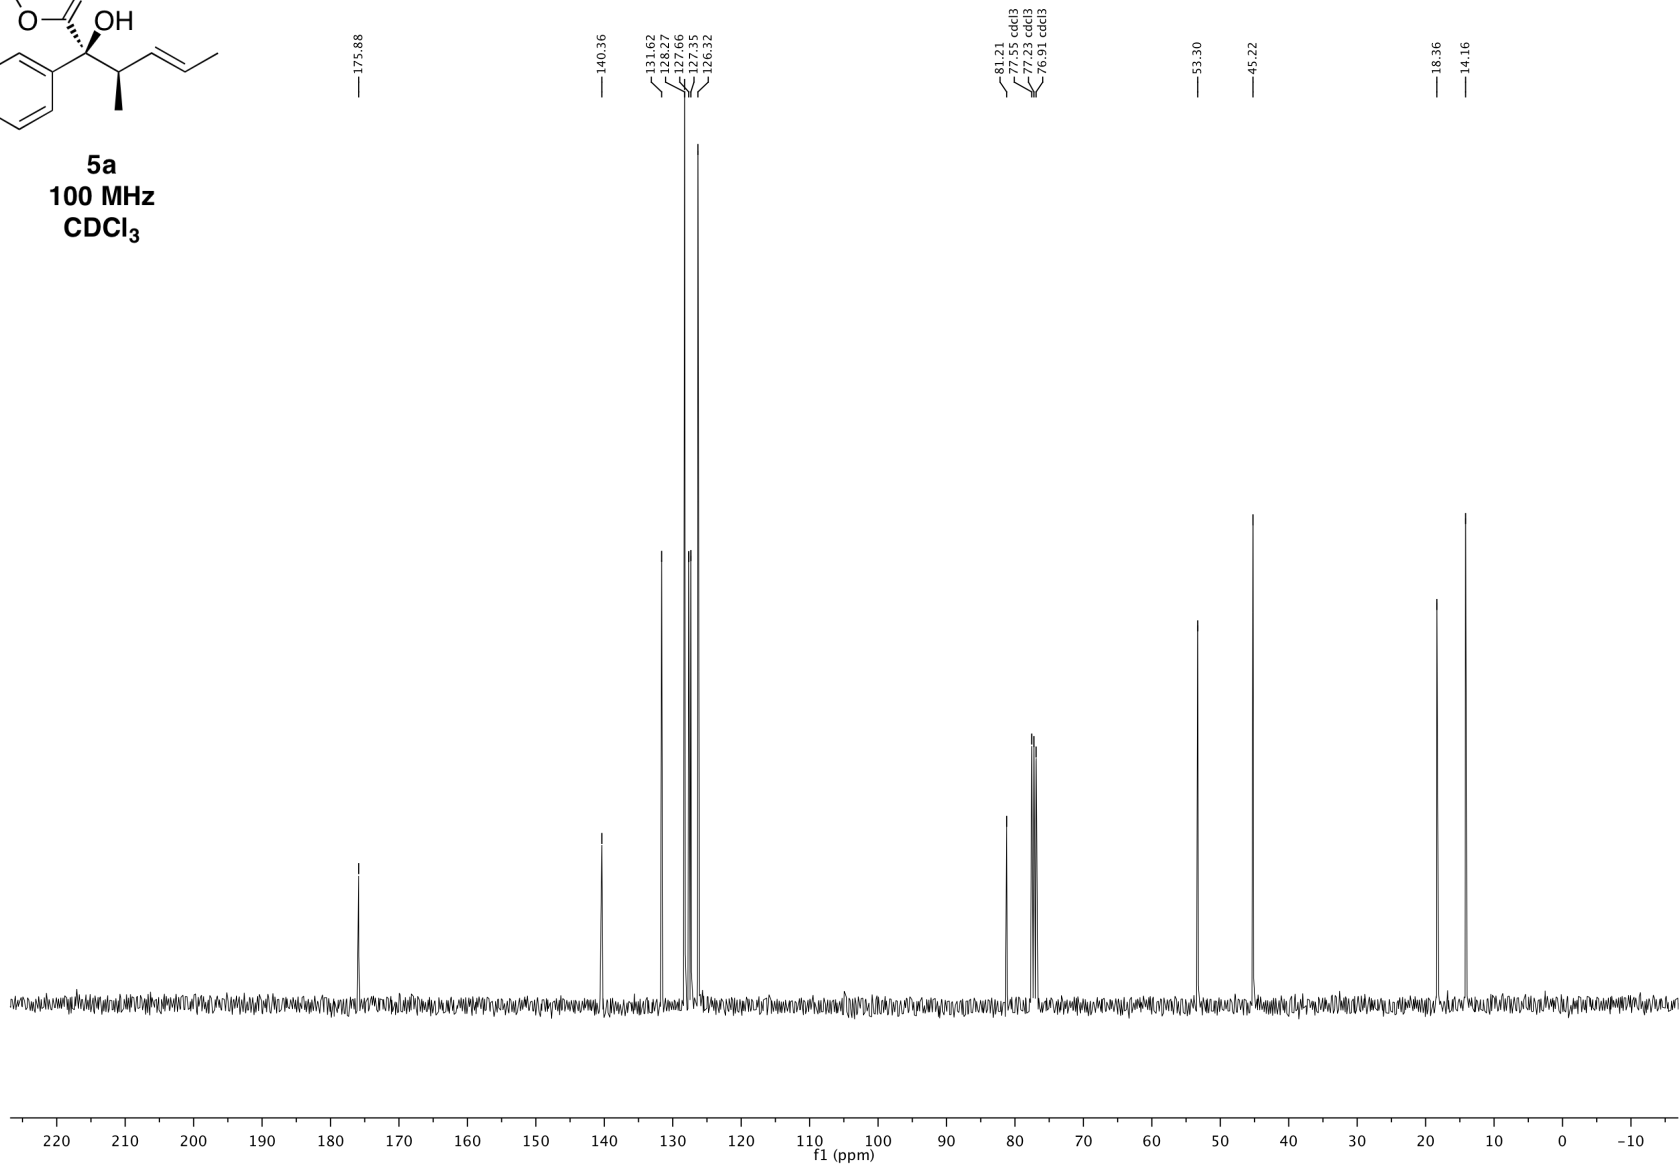

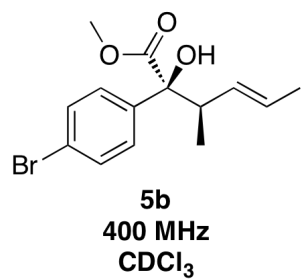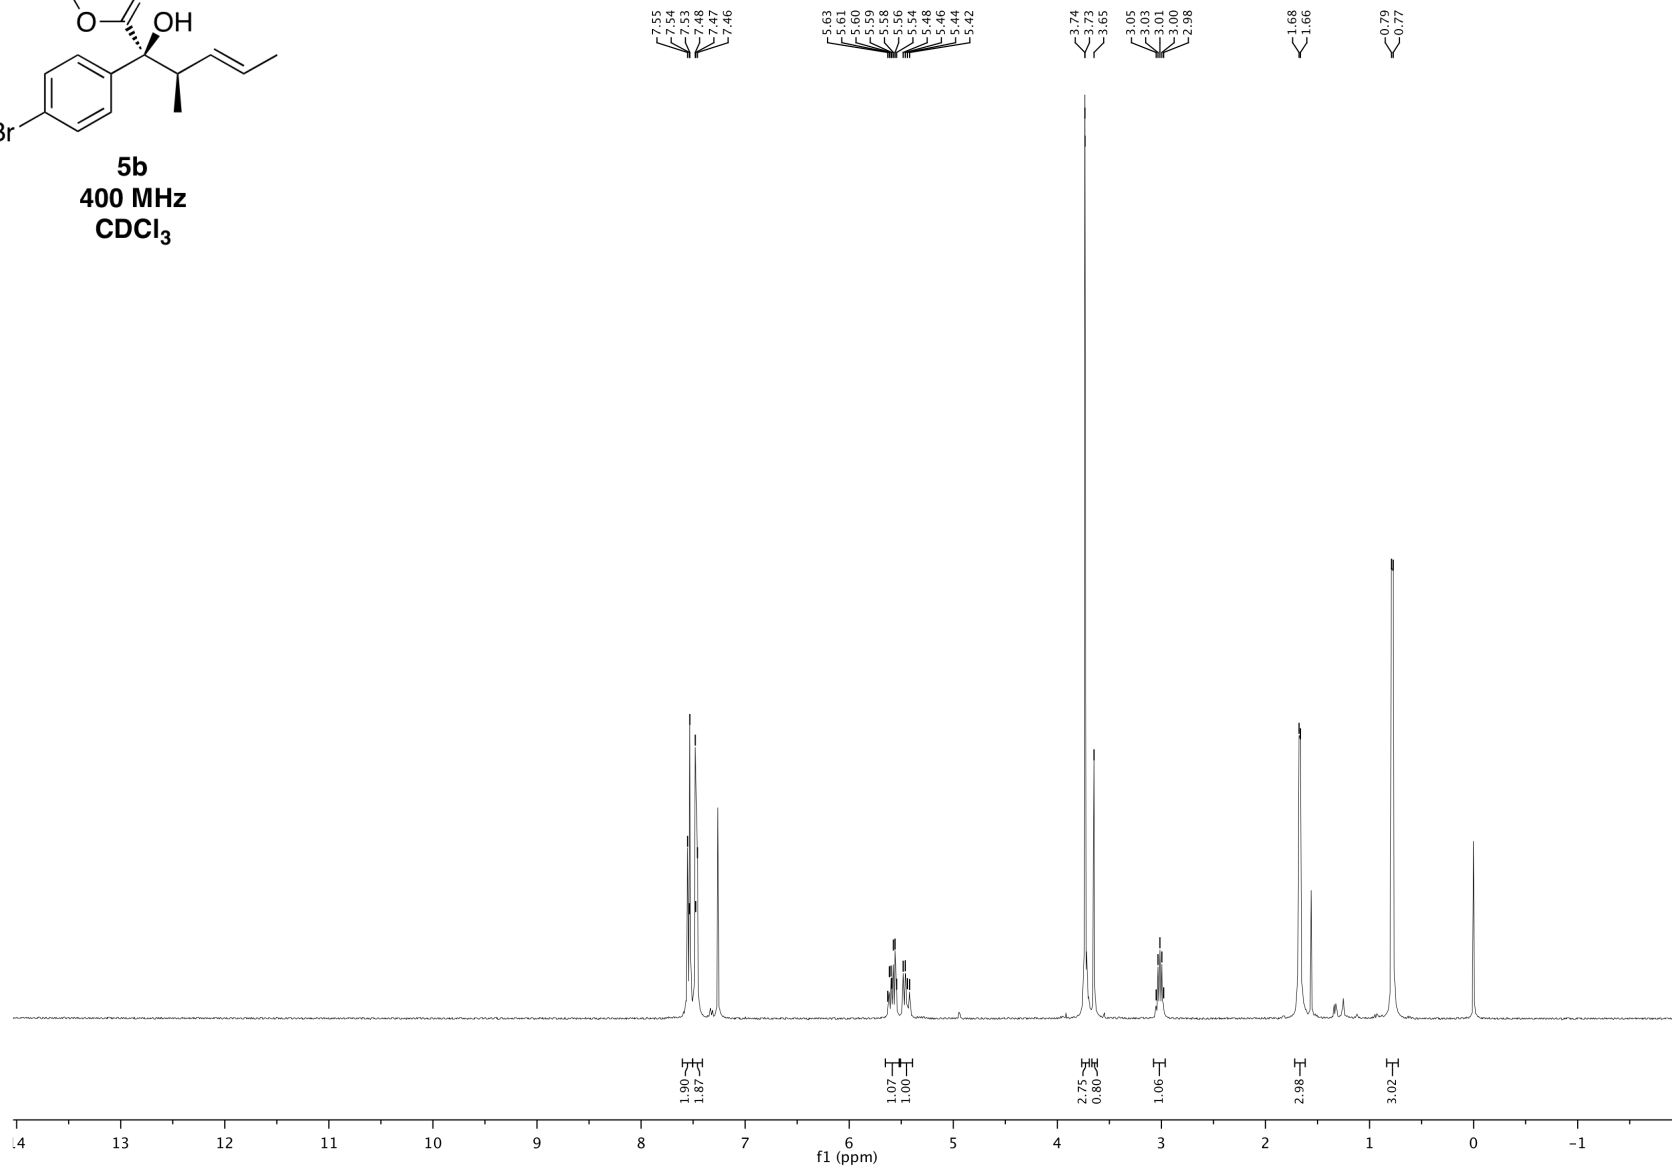

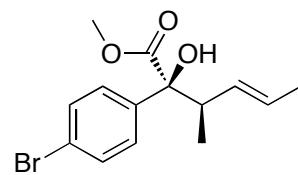

**5b**  
100 MHz  
CDCl<sub>3</sub>

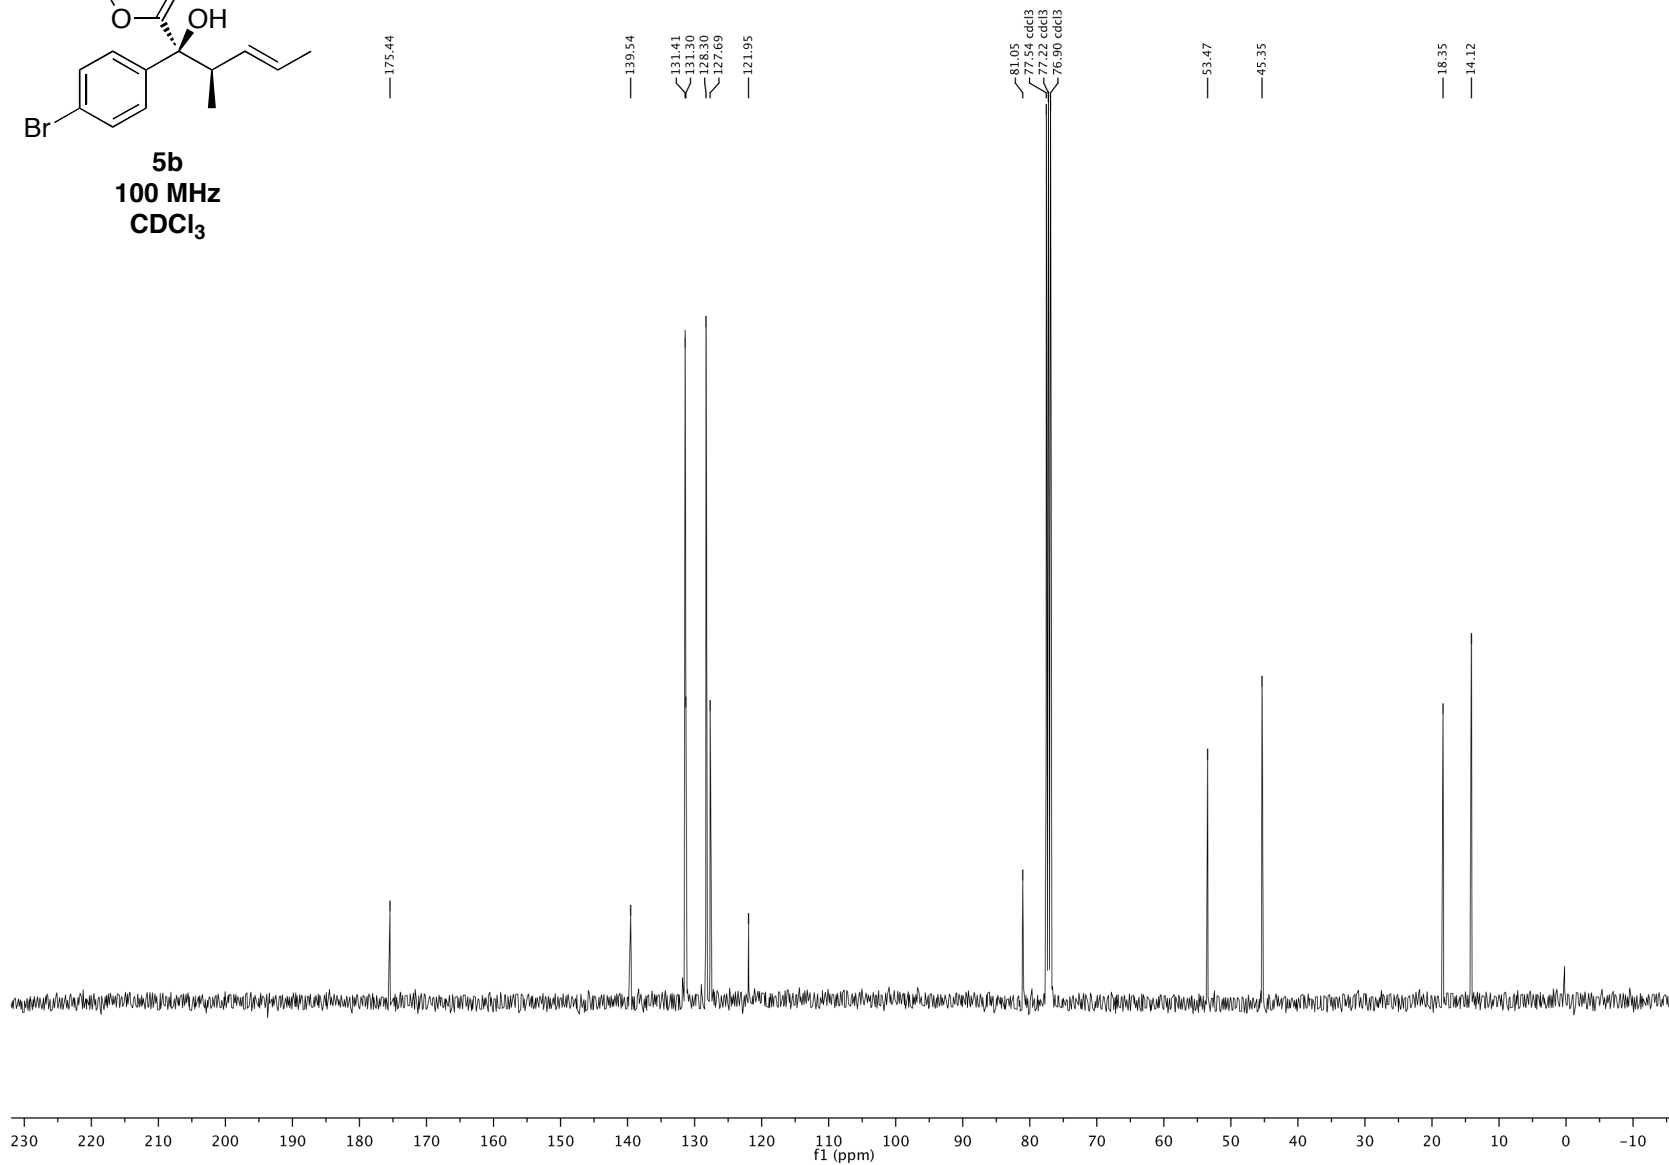

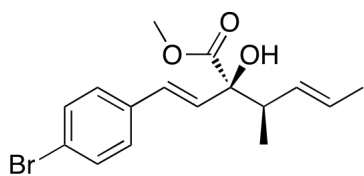

**5c**  
**400 MHz**  
**CDCl<sub>3</sub>**

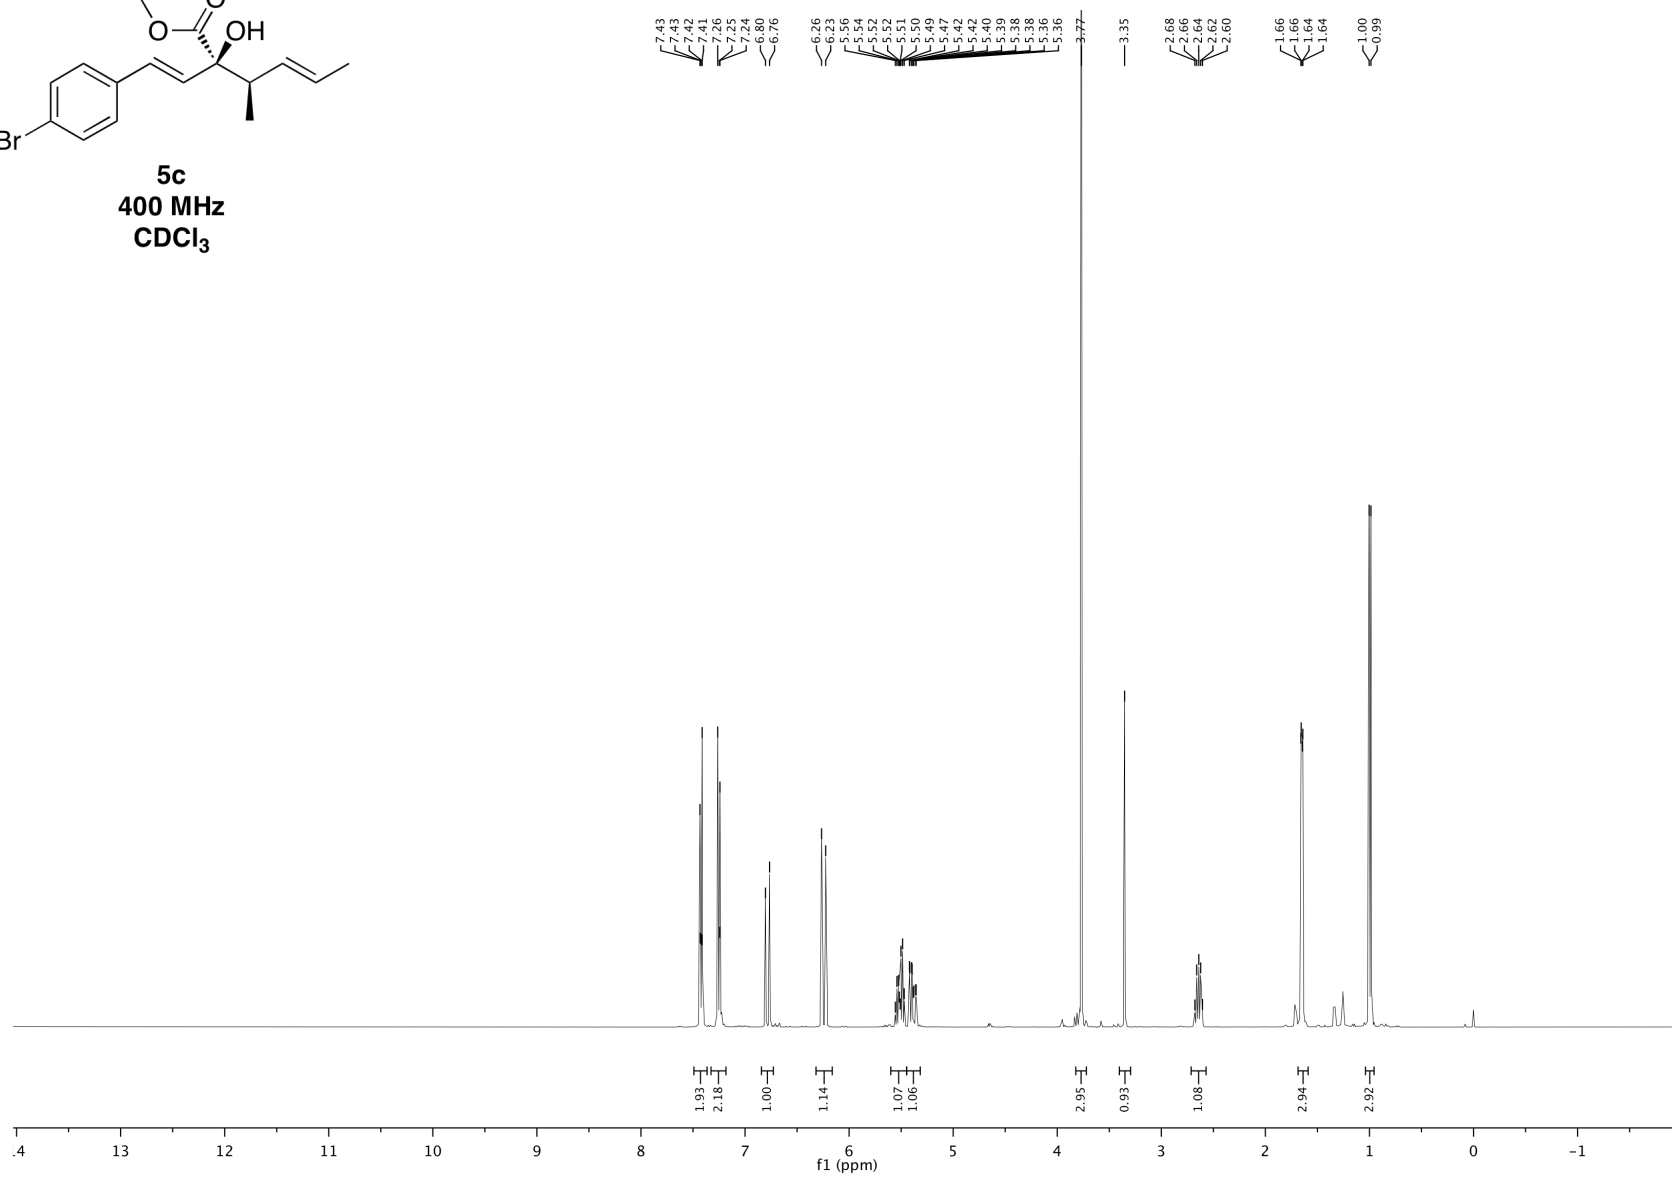

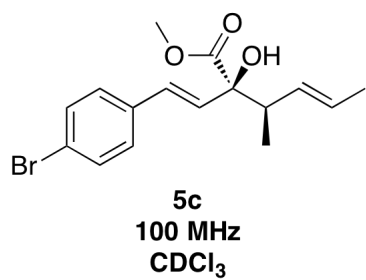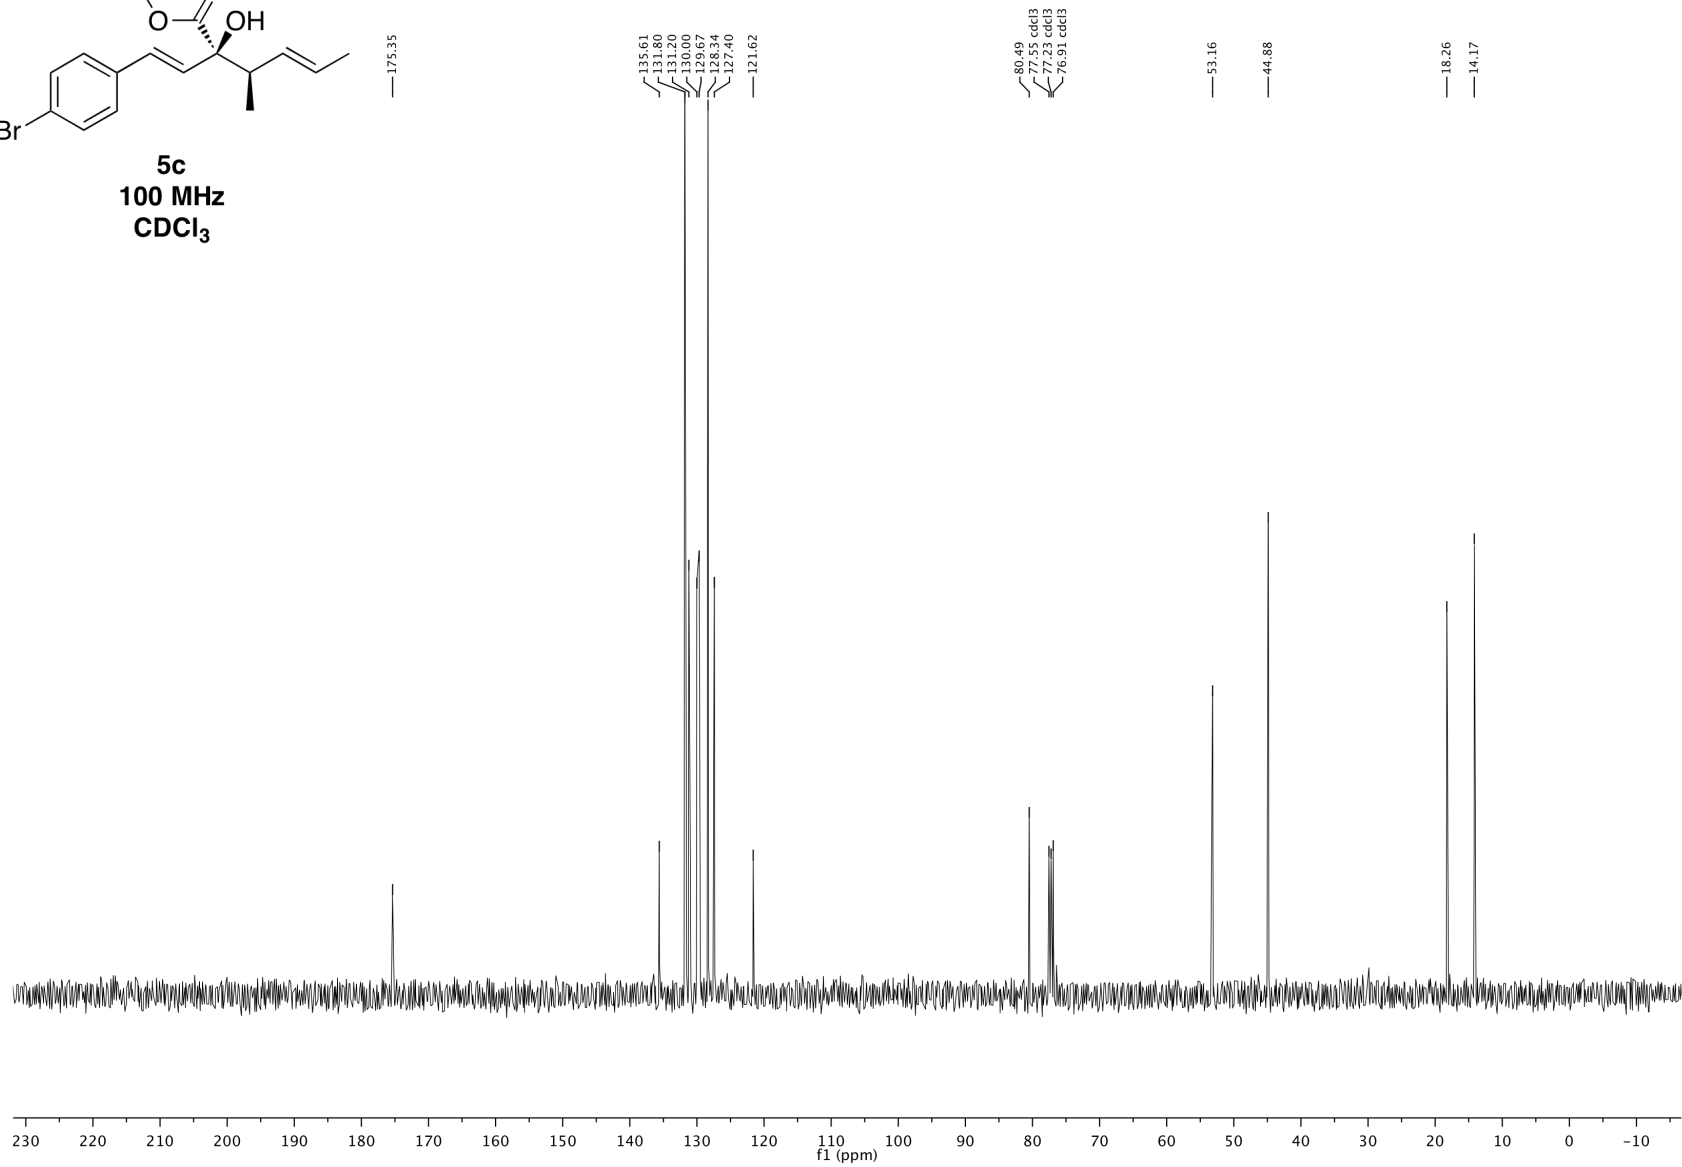



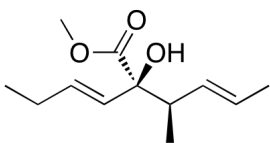

**5d**  
**400 MHz**  
**CDCl<sub>3</sub>**

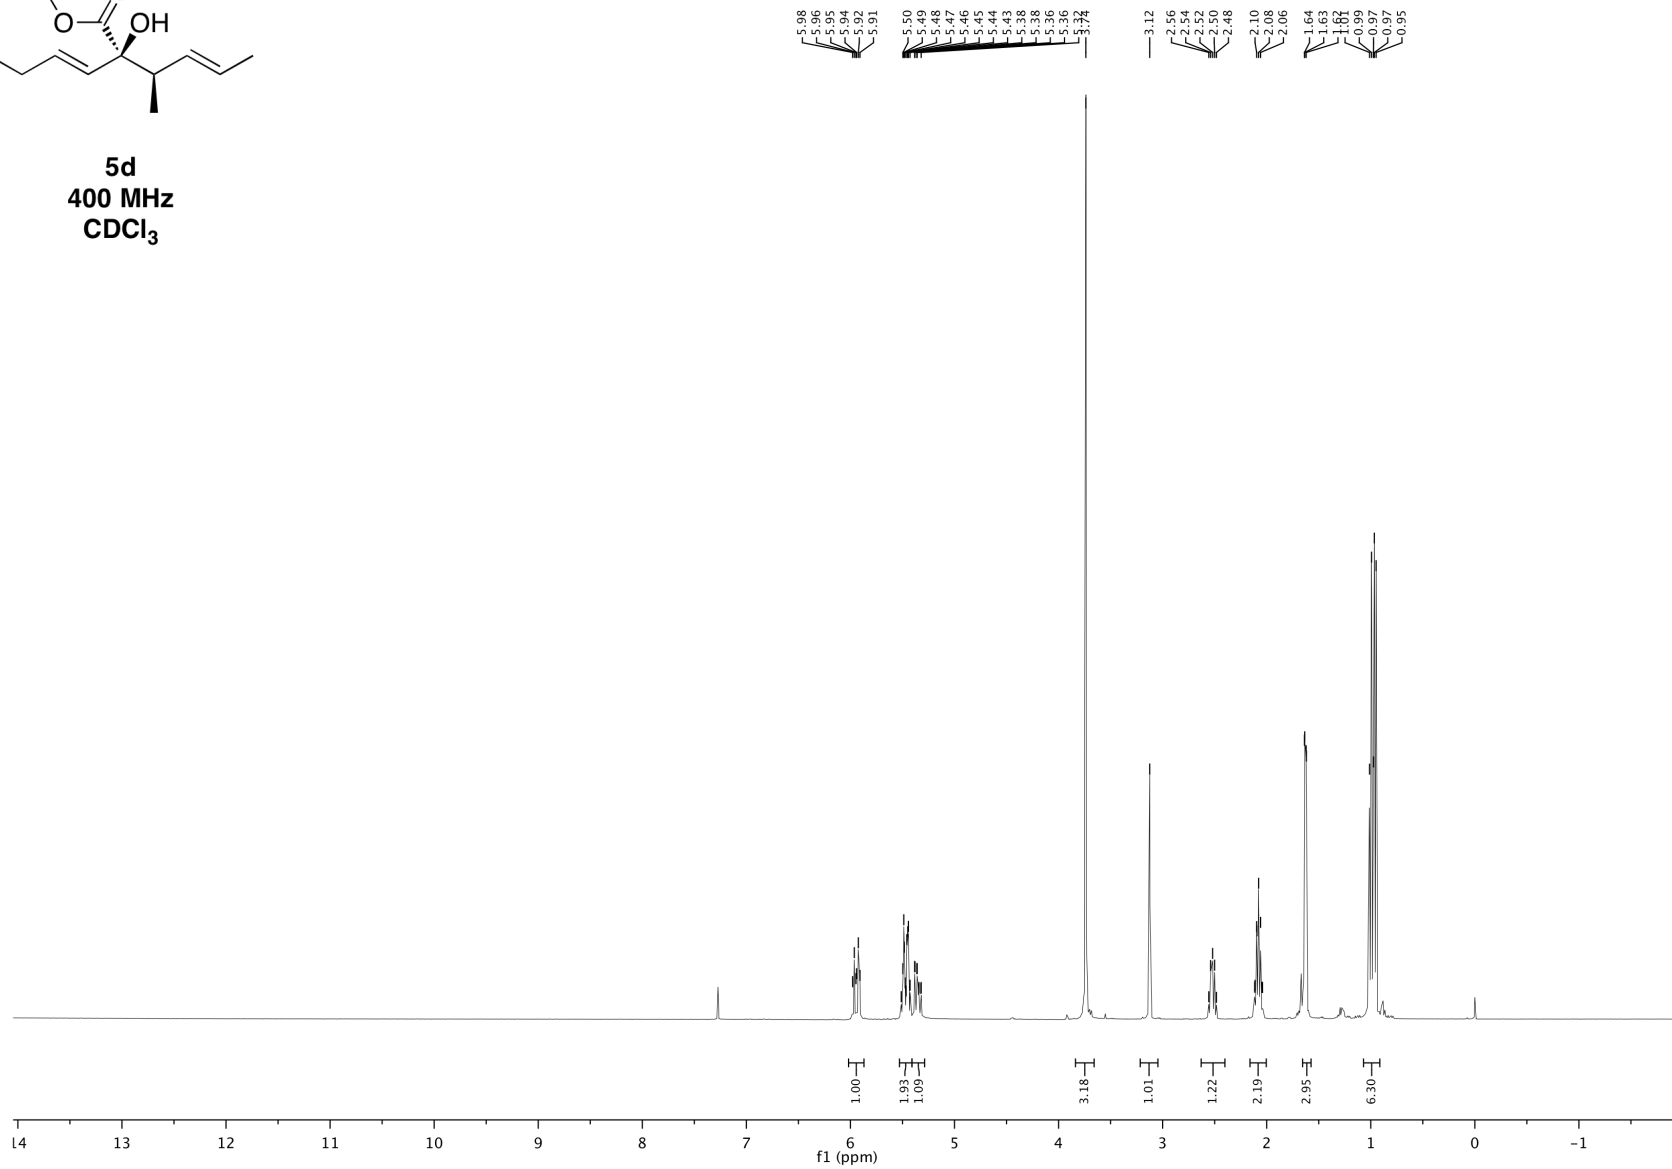

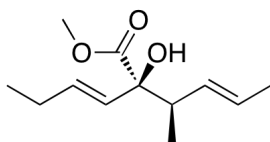

5d  
100 MHz  
CDCl<sub>3</sub>

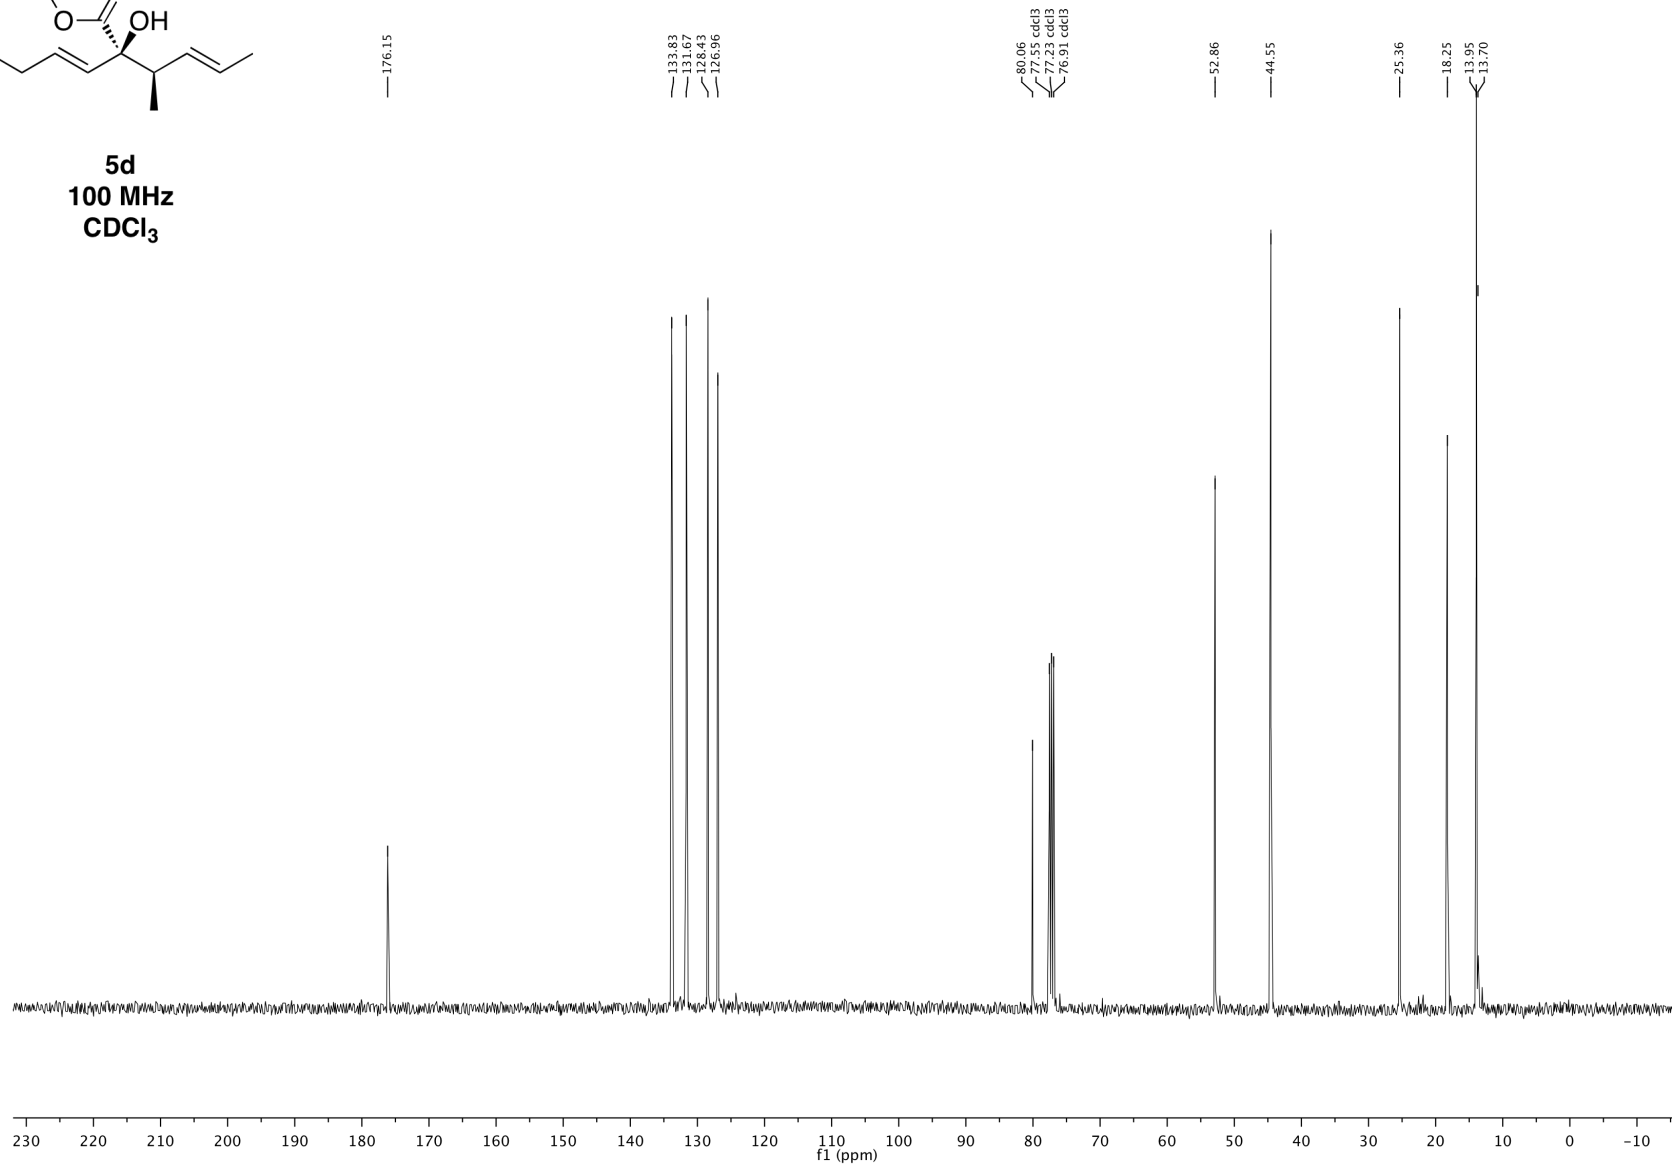

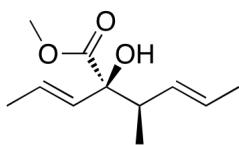

**5e**  
400 MHz  
CDCl<sub>3</sub>

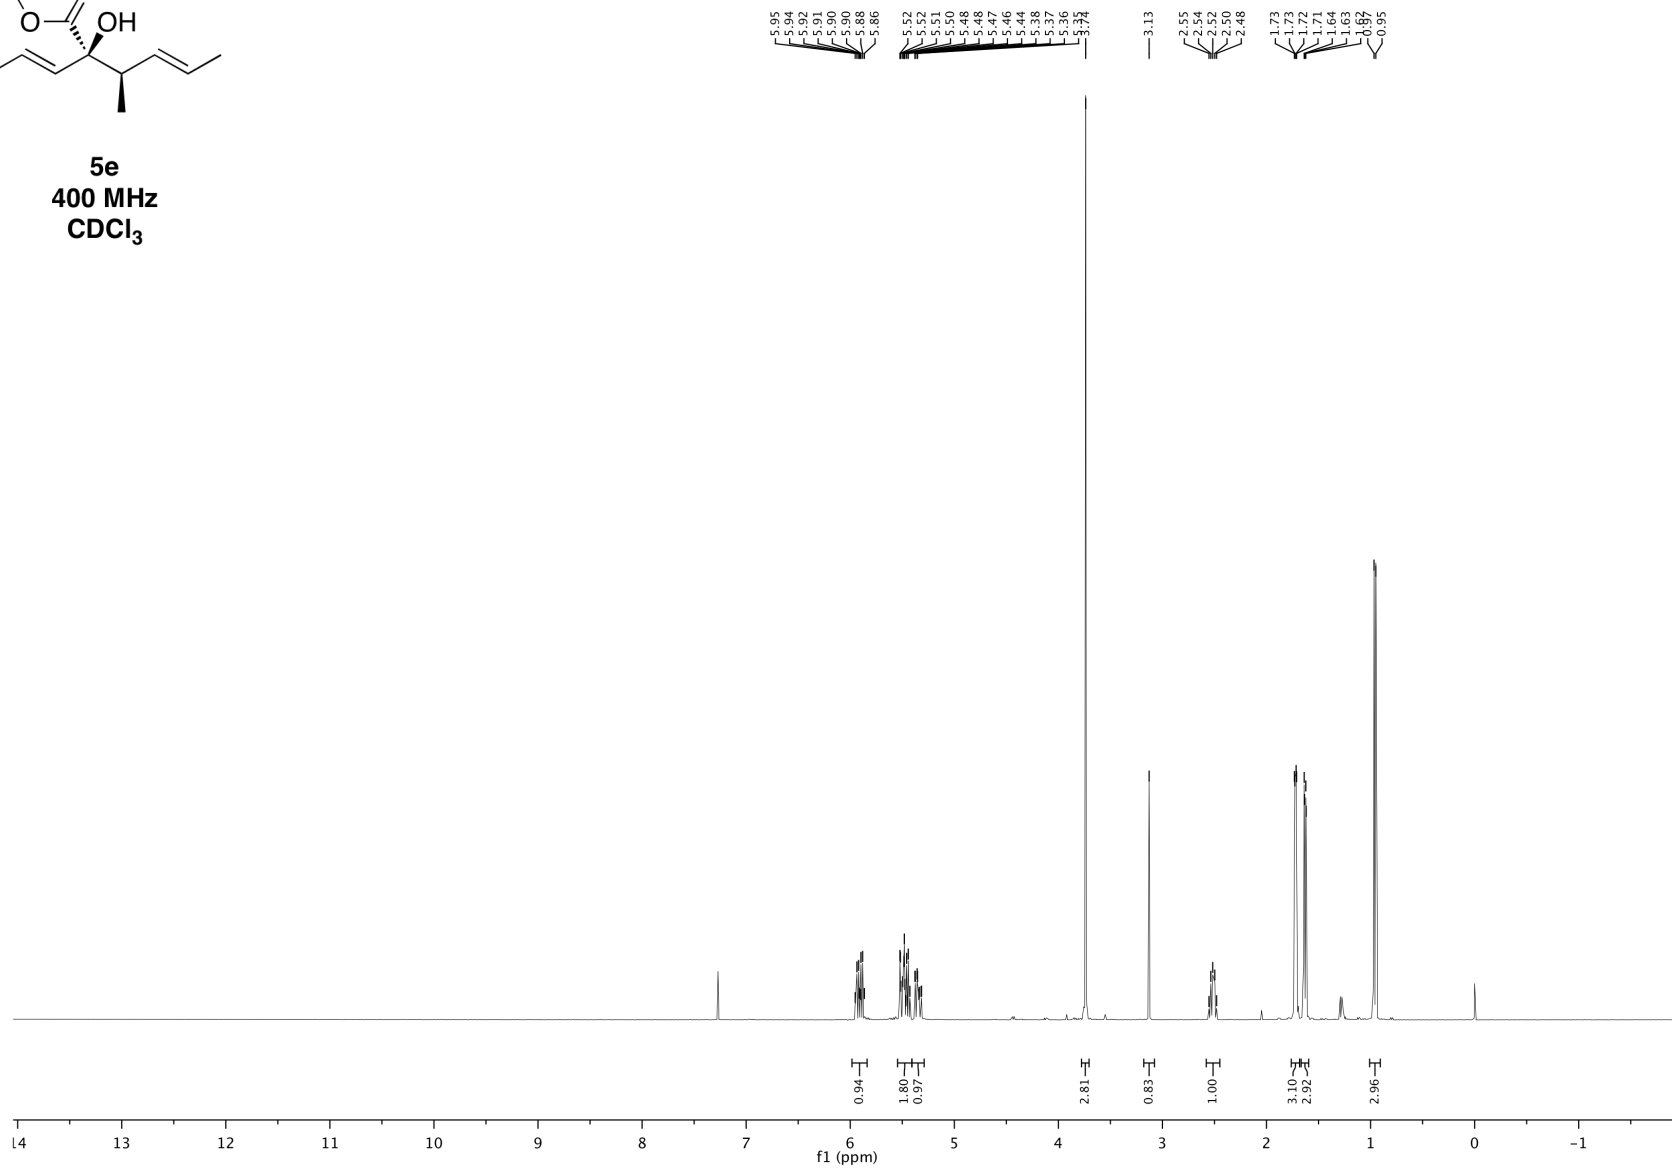

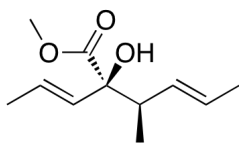

**5e**  
100 MHz  
CDCl<sub>3</sub>

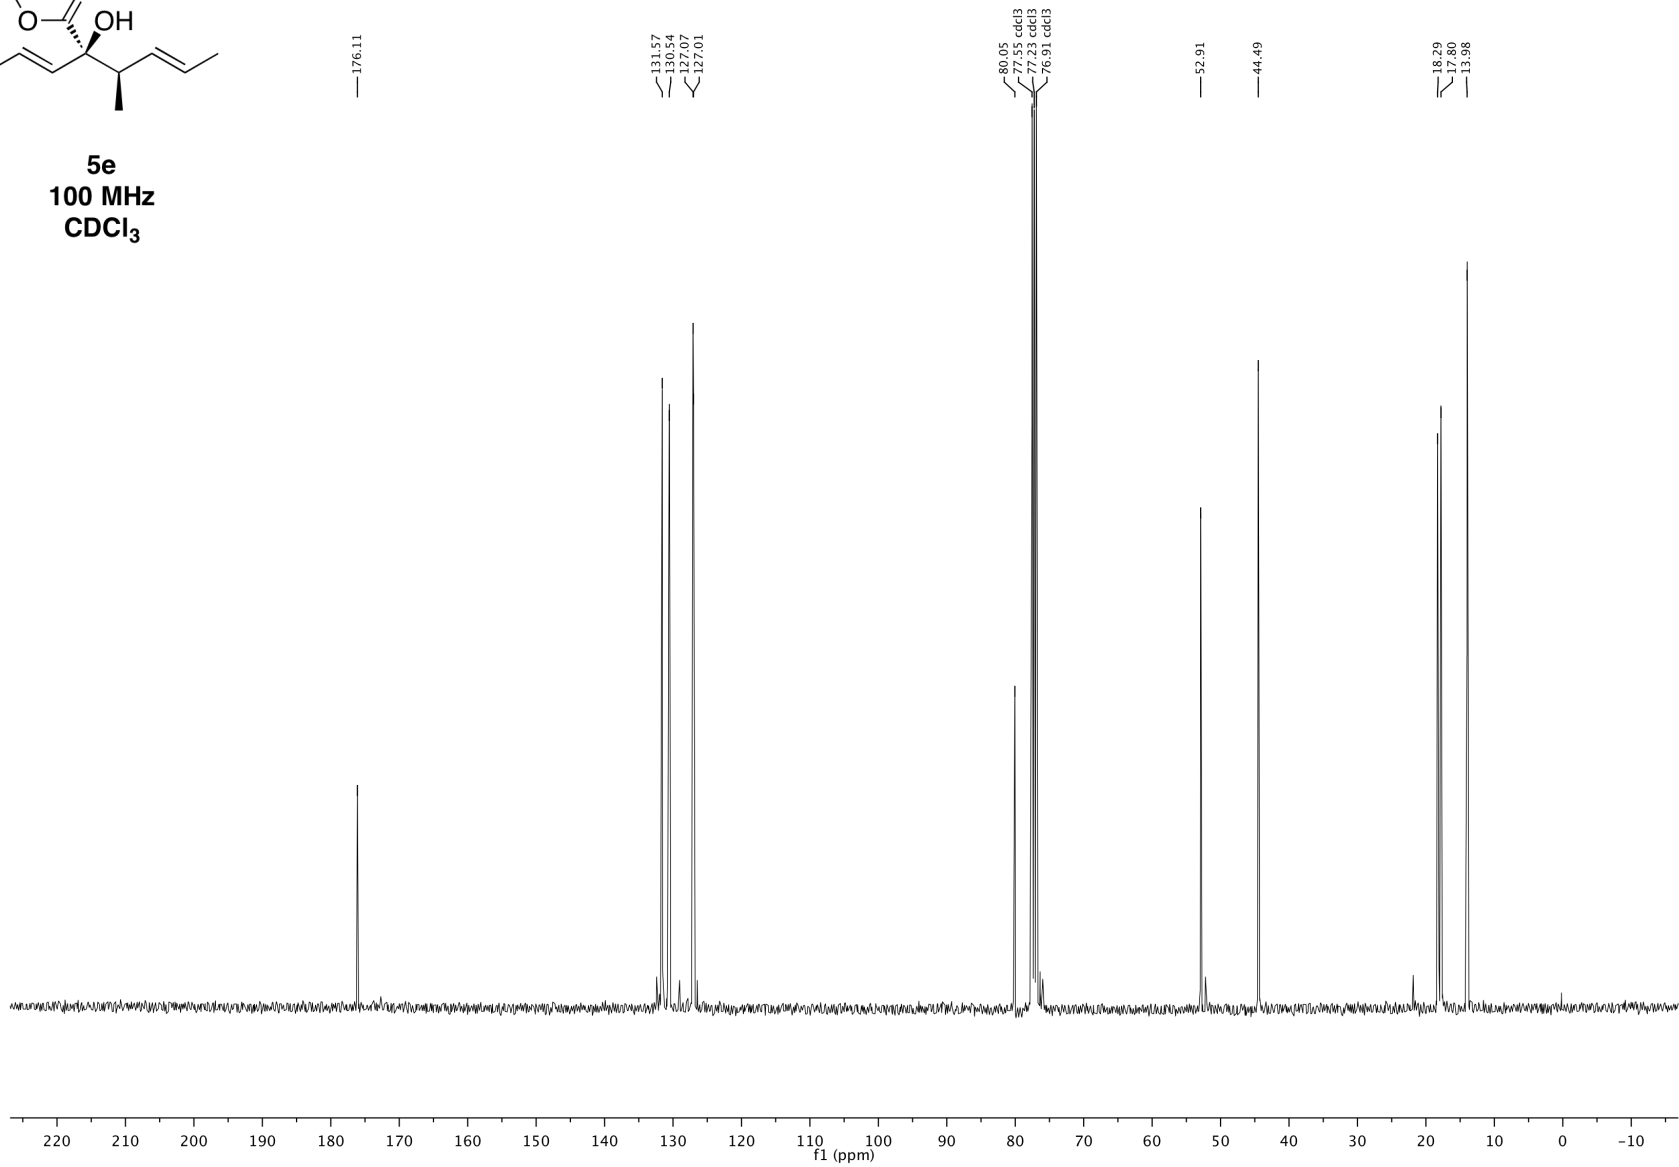

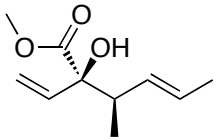

5f  
400 MHz  
CDCl<sub>3</sub>

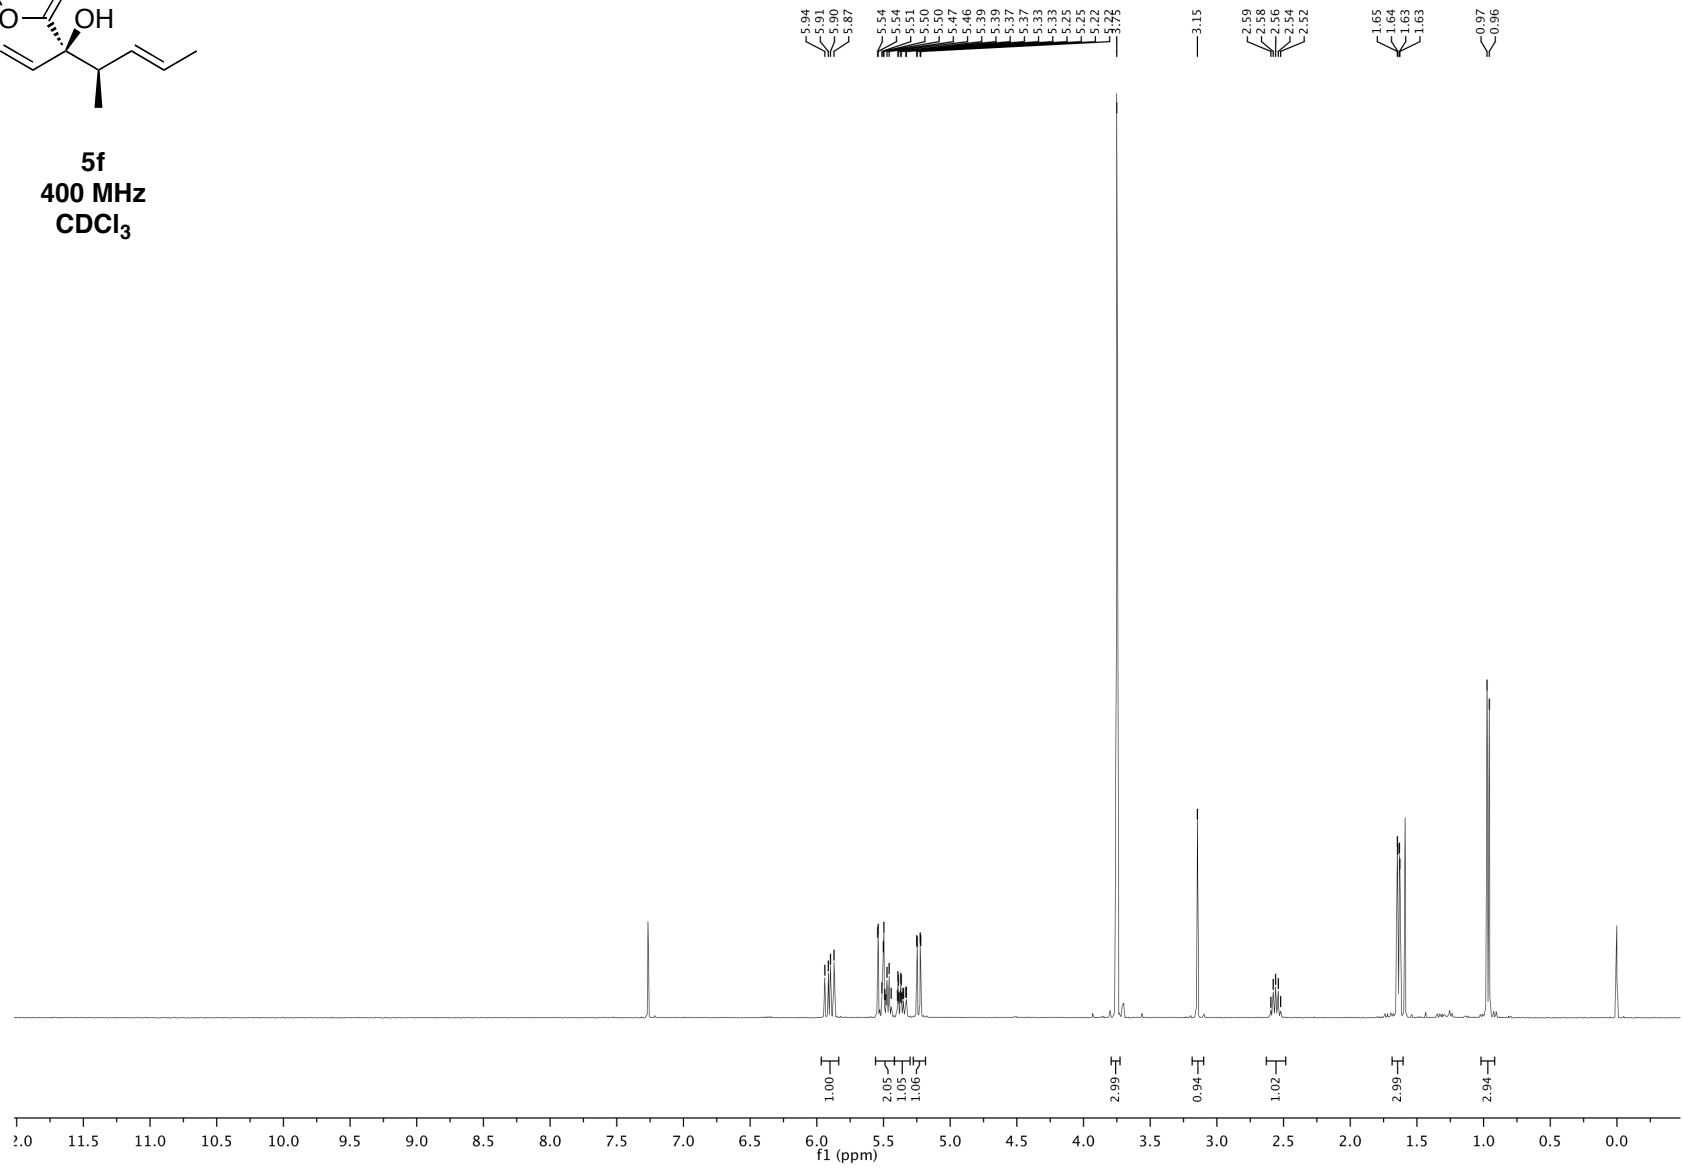

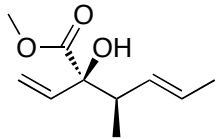

5f  
100 MHz  
CDCl<sub>3</sub>

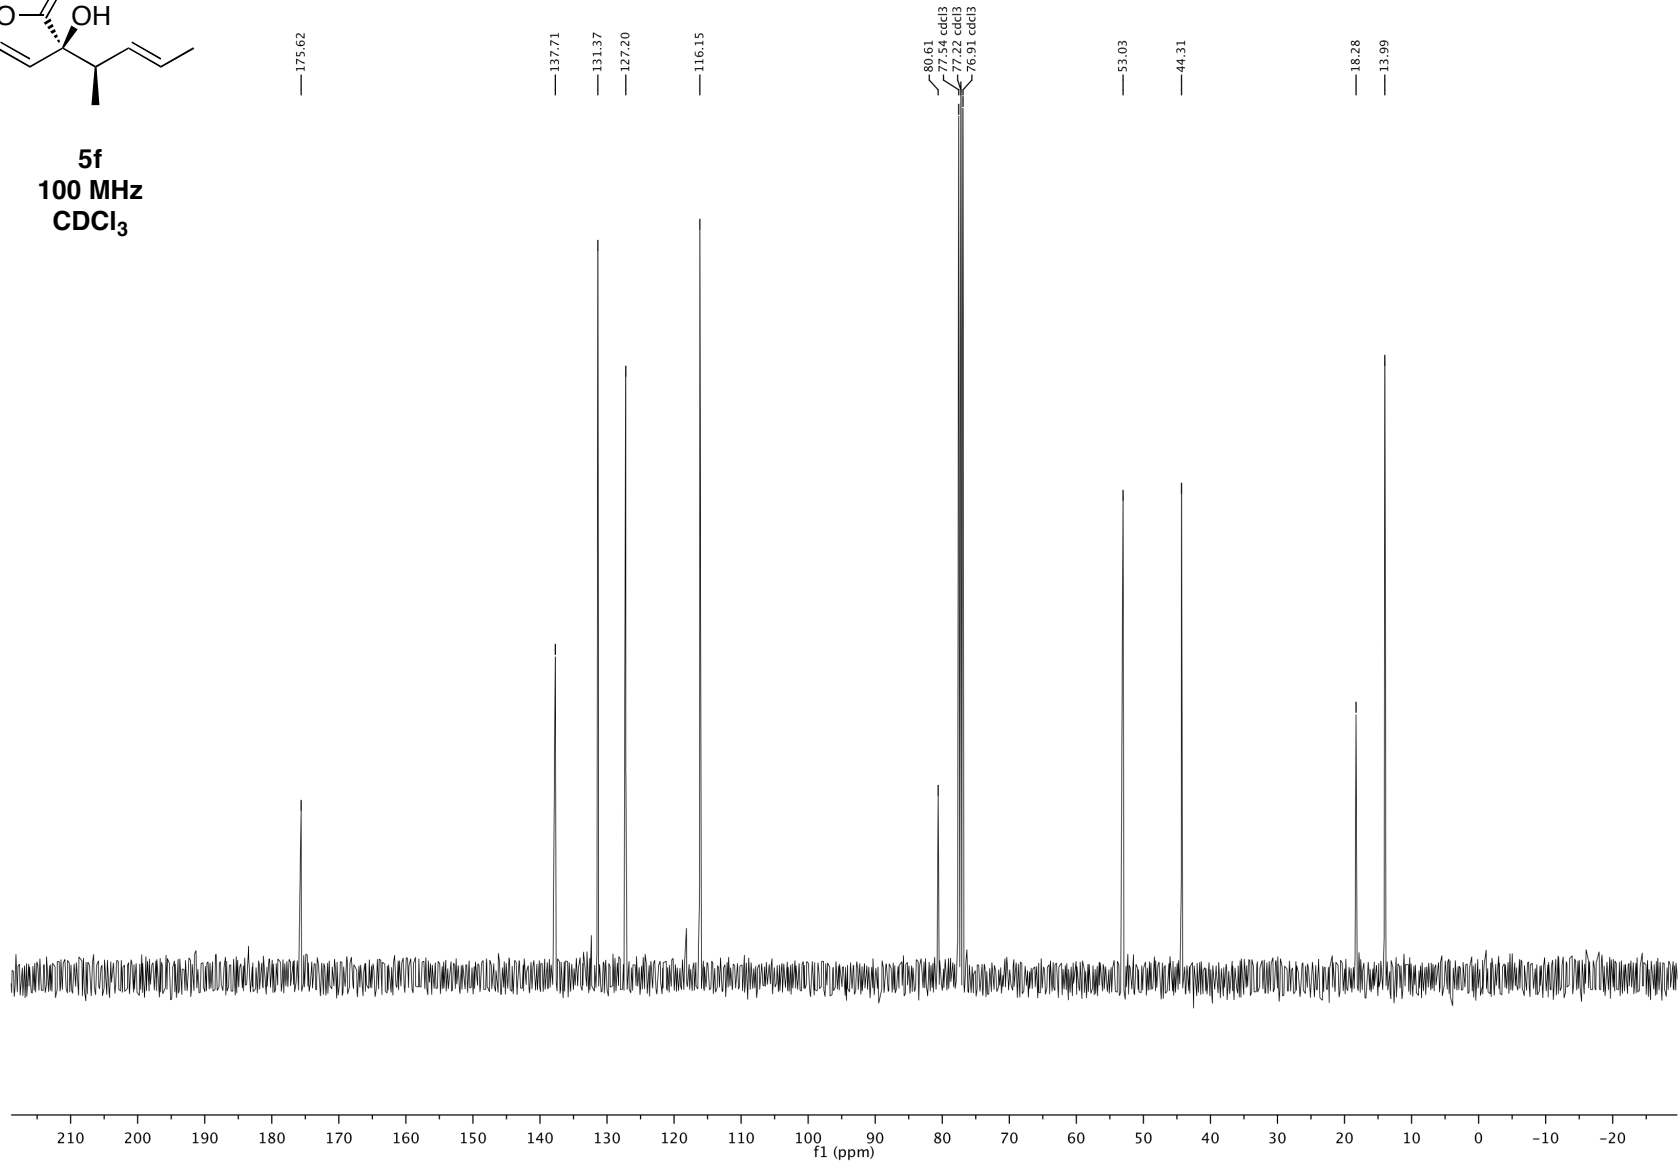

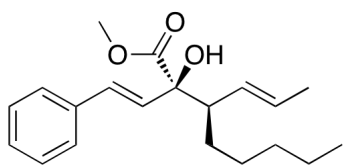

**7a**  
400 MHz  
CDCl<sub>3</sub>

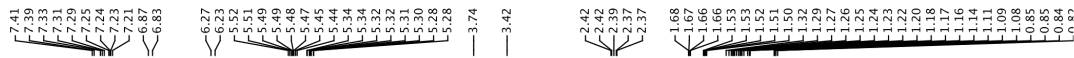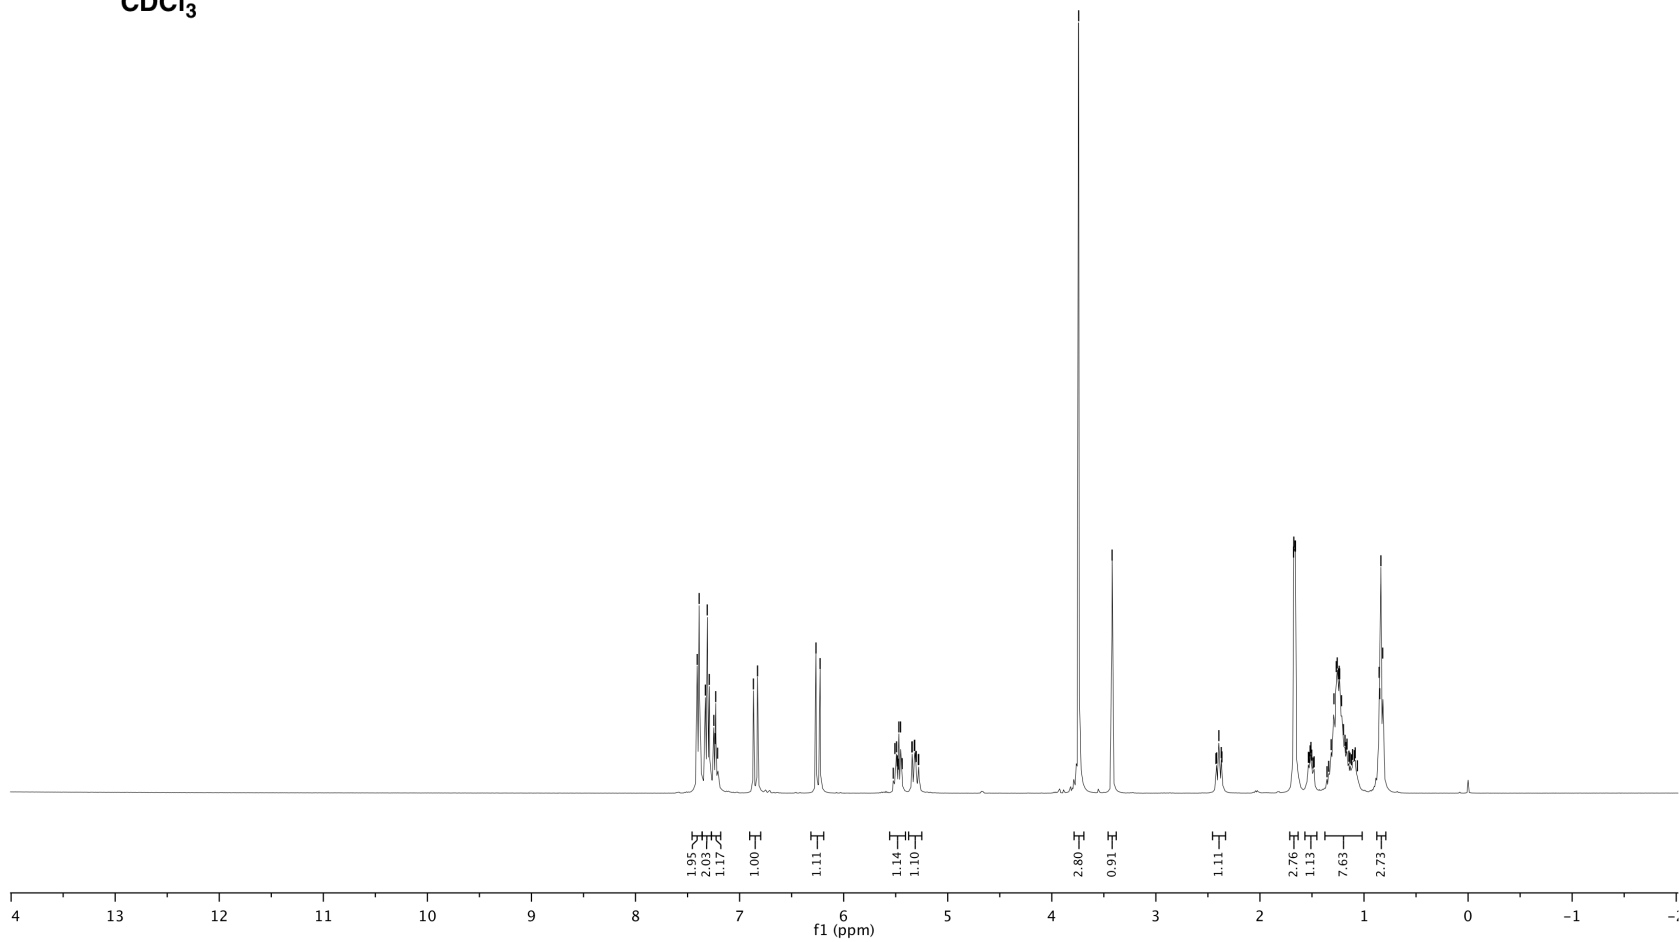

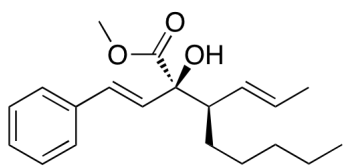

**7a**  
100 MHz  
CDCl<sub>3</sub>

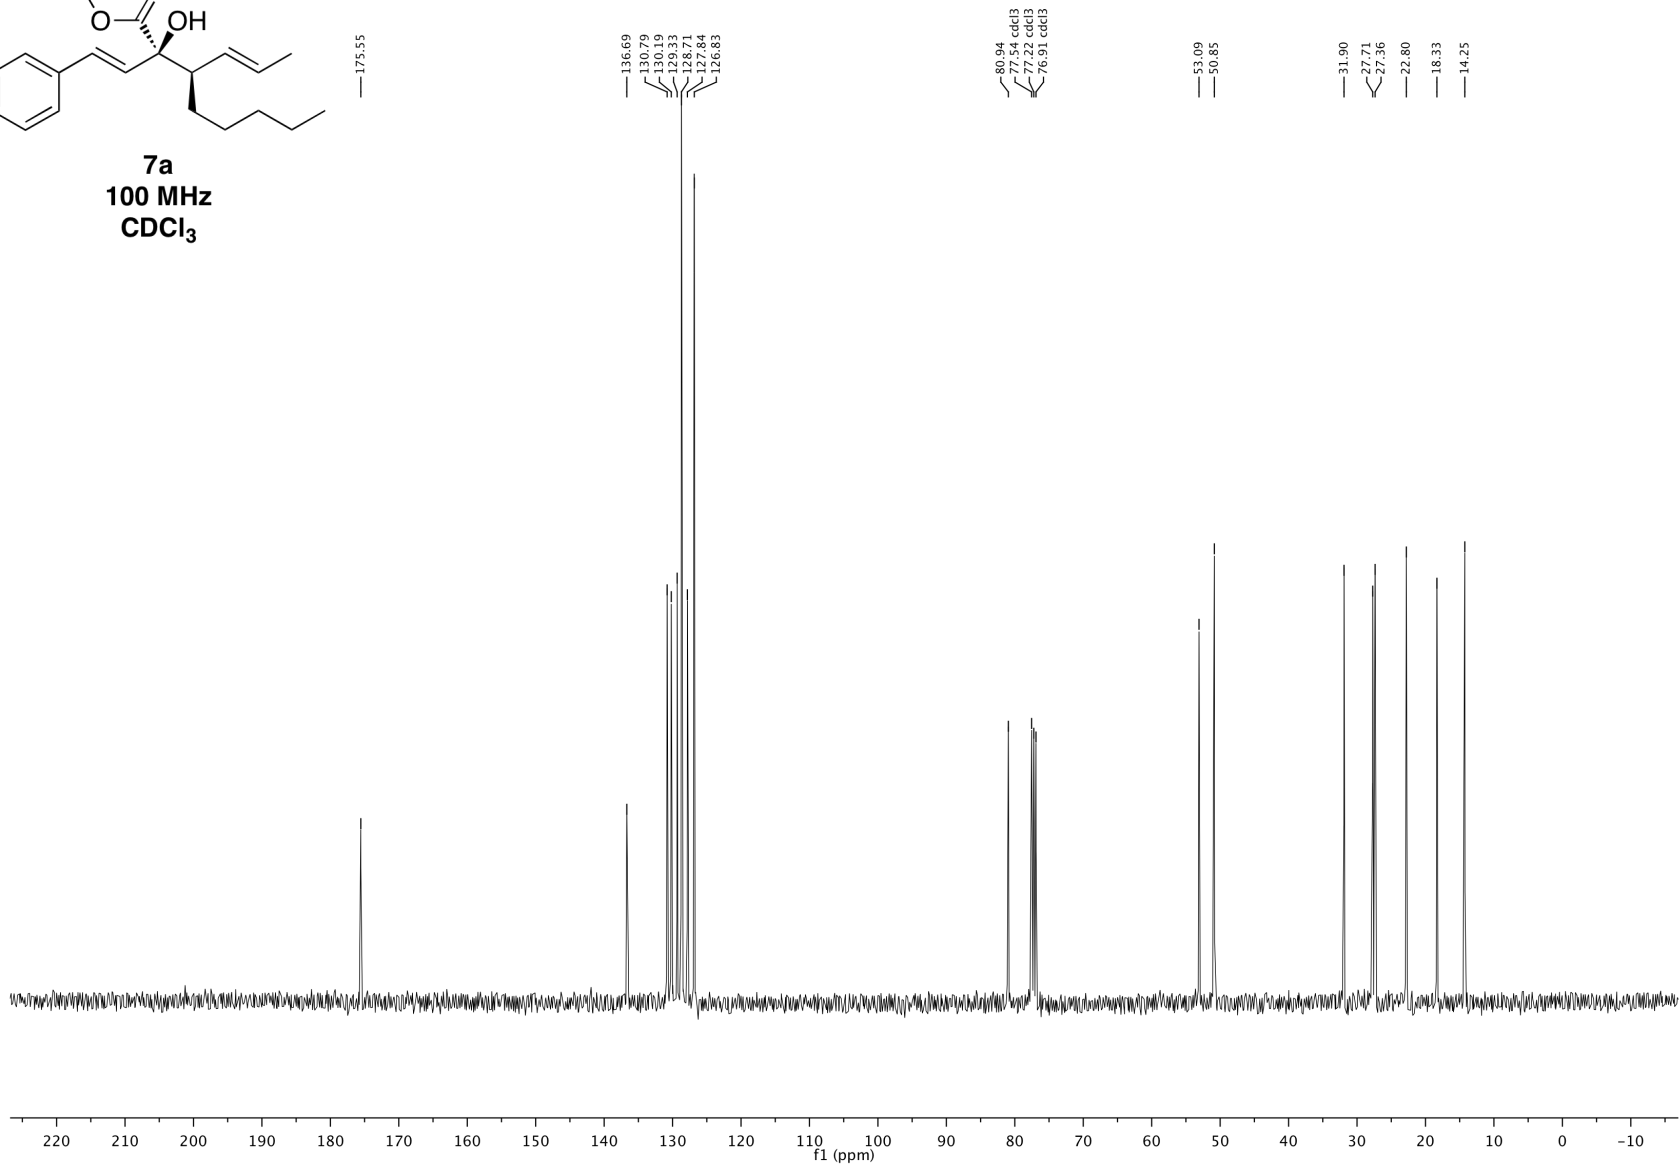



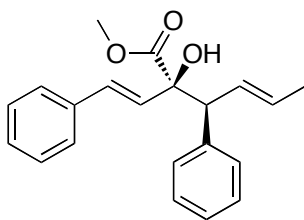

**7b**  
400 MHz  
CDCl<sub>3</sub>

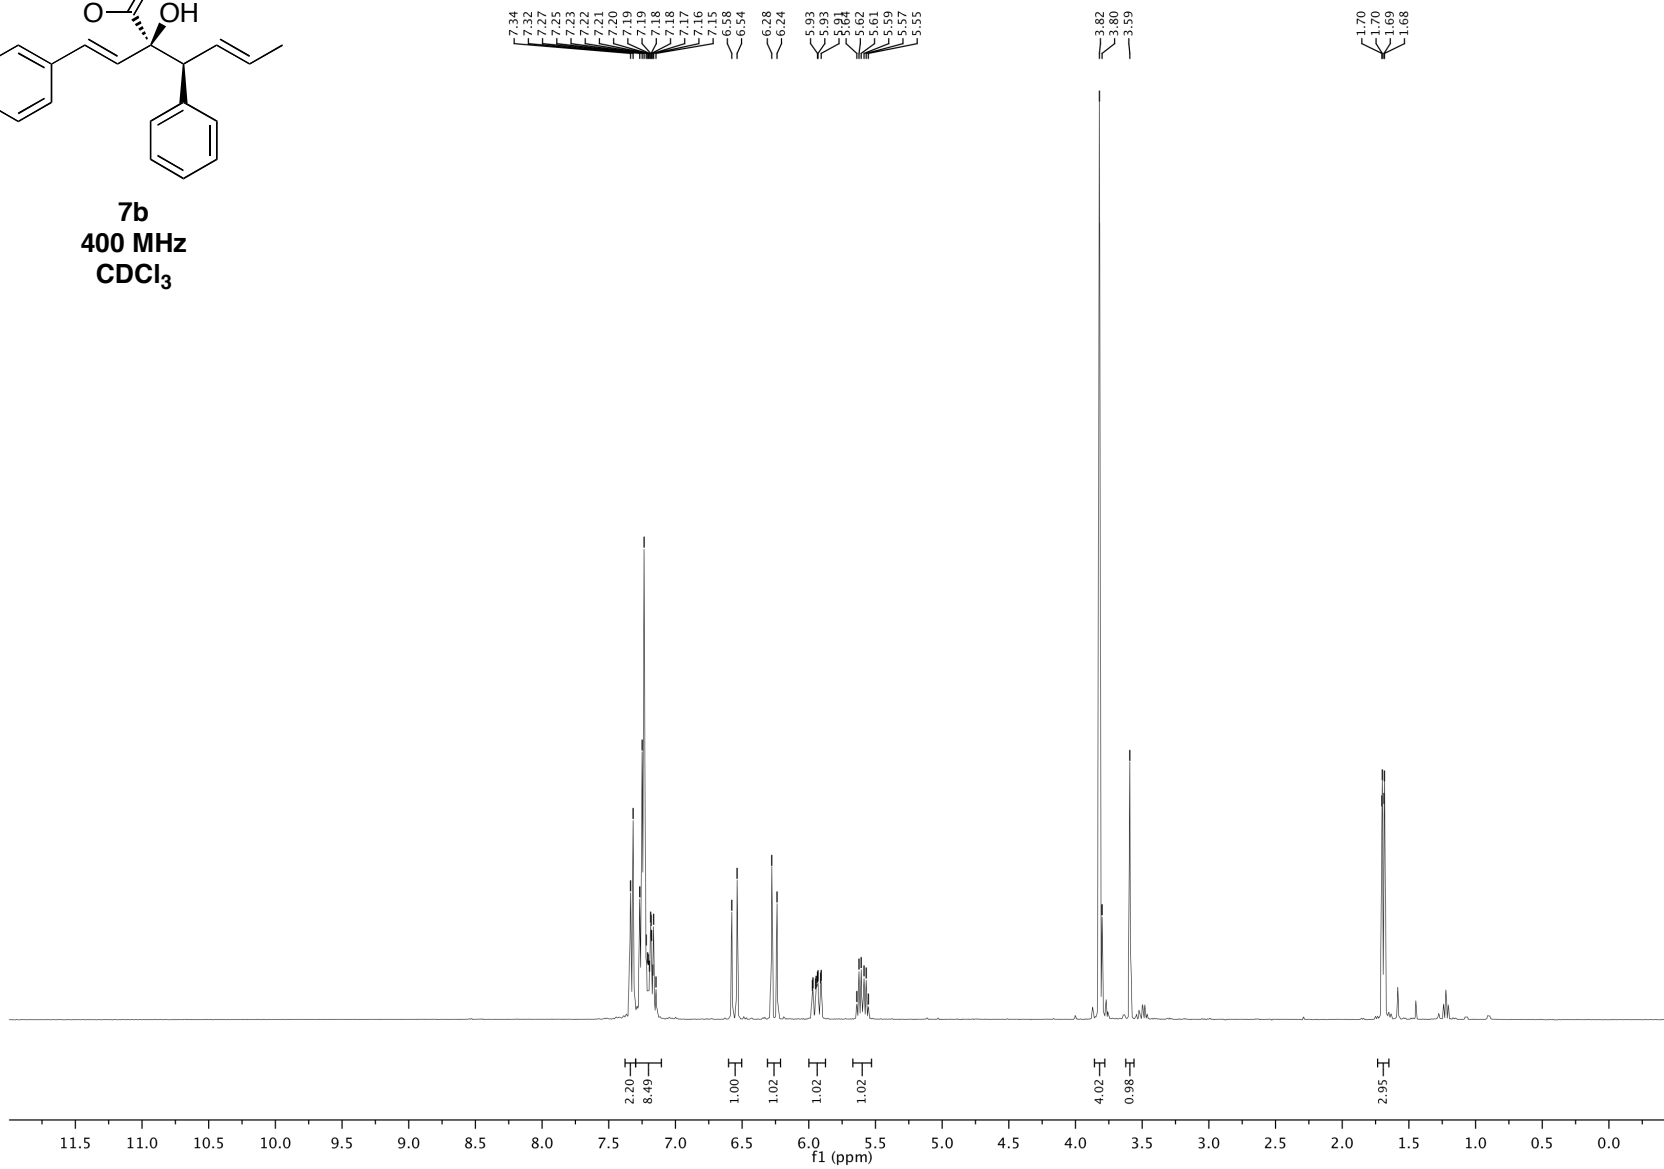

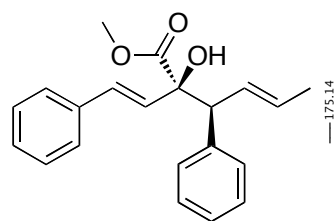

**7b**  
100 MHz  
CDCl<sub>3</sub>

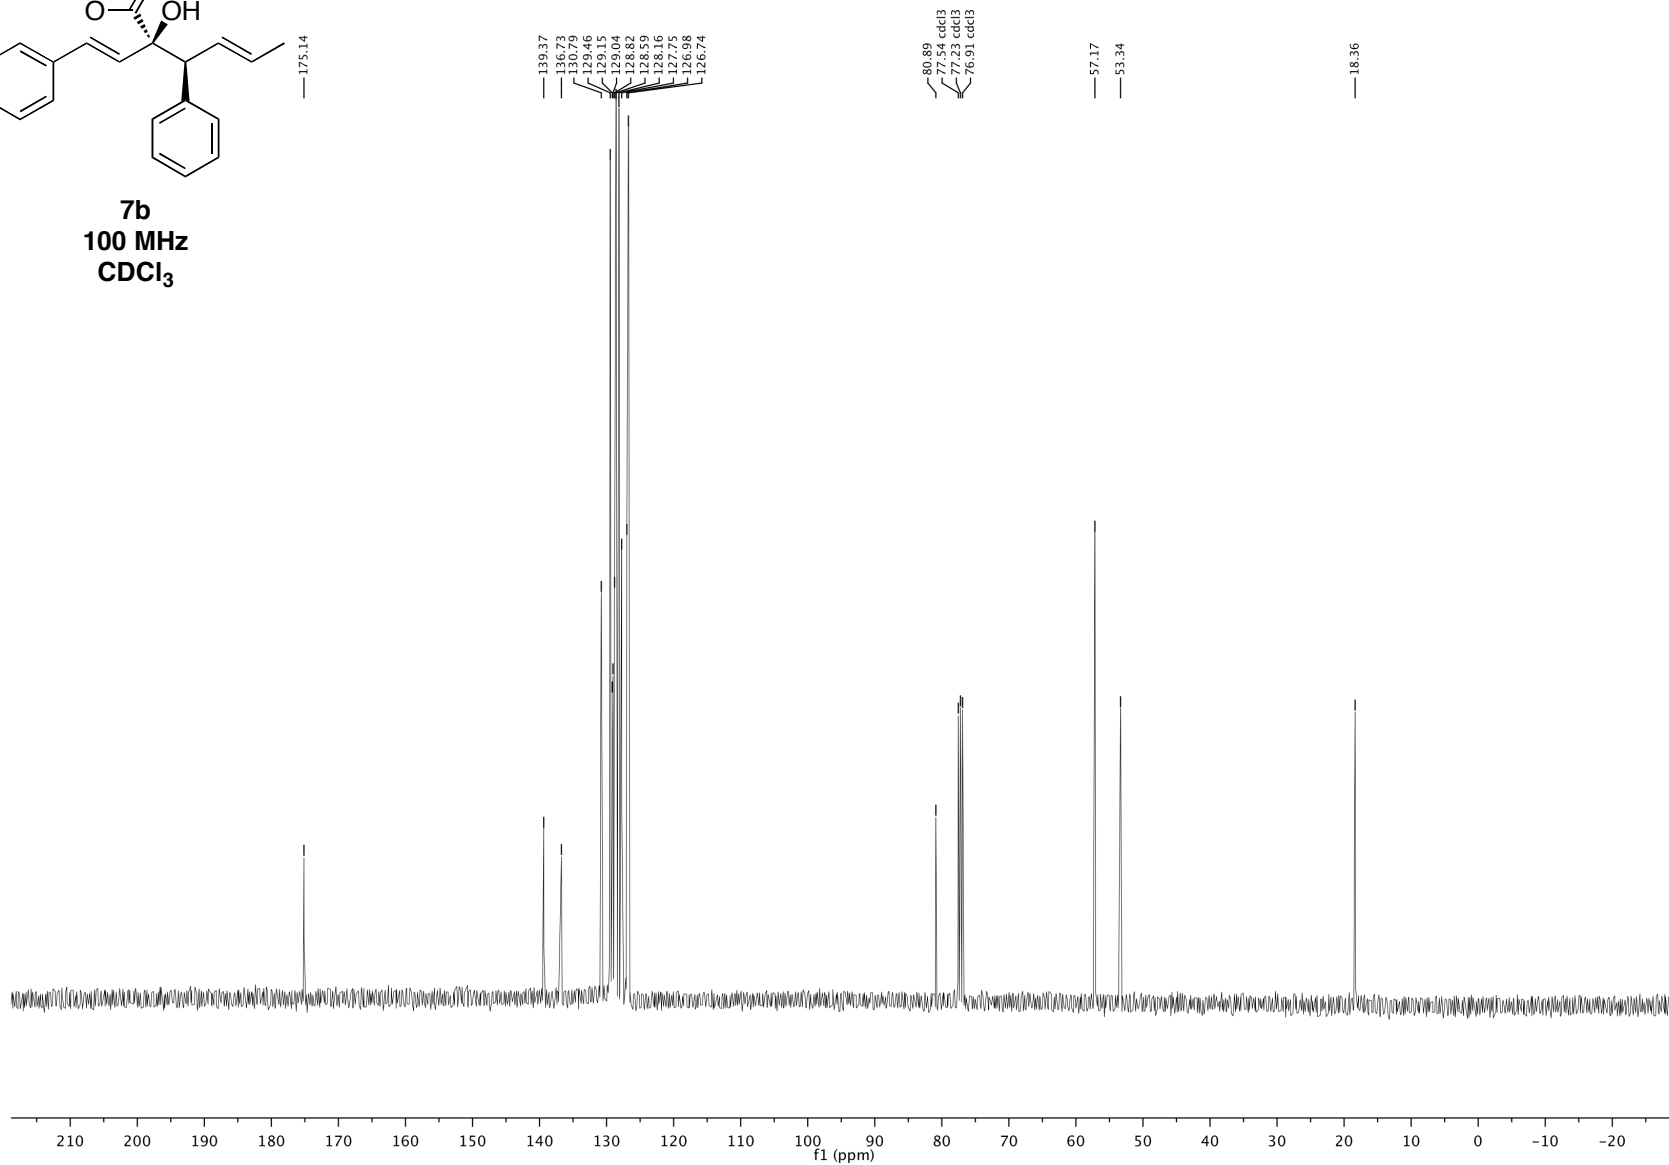

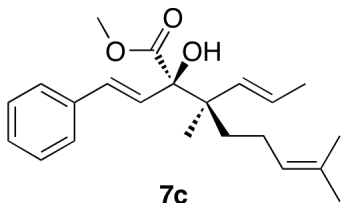

**7c**  
400 MHz  
CDCl<sub>3</sub>

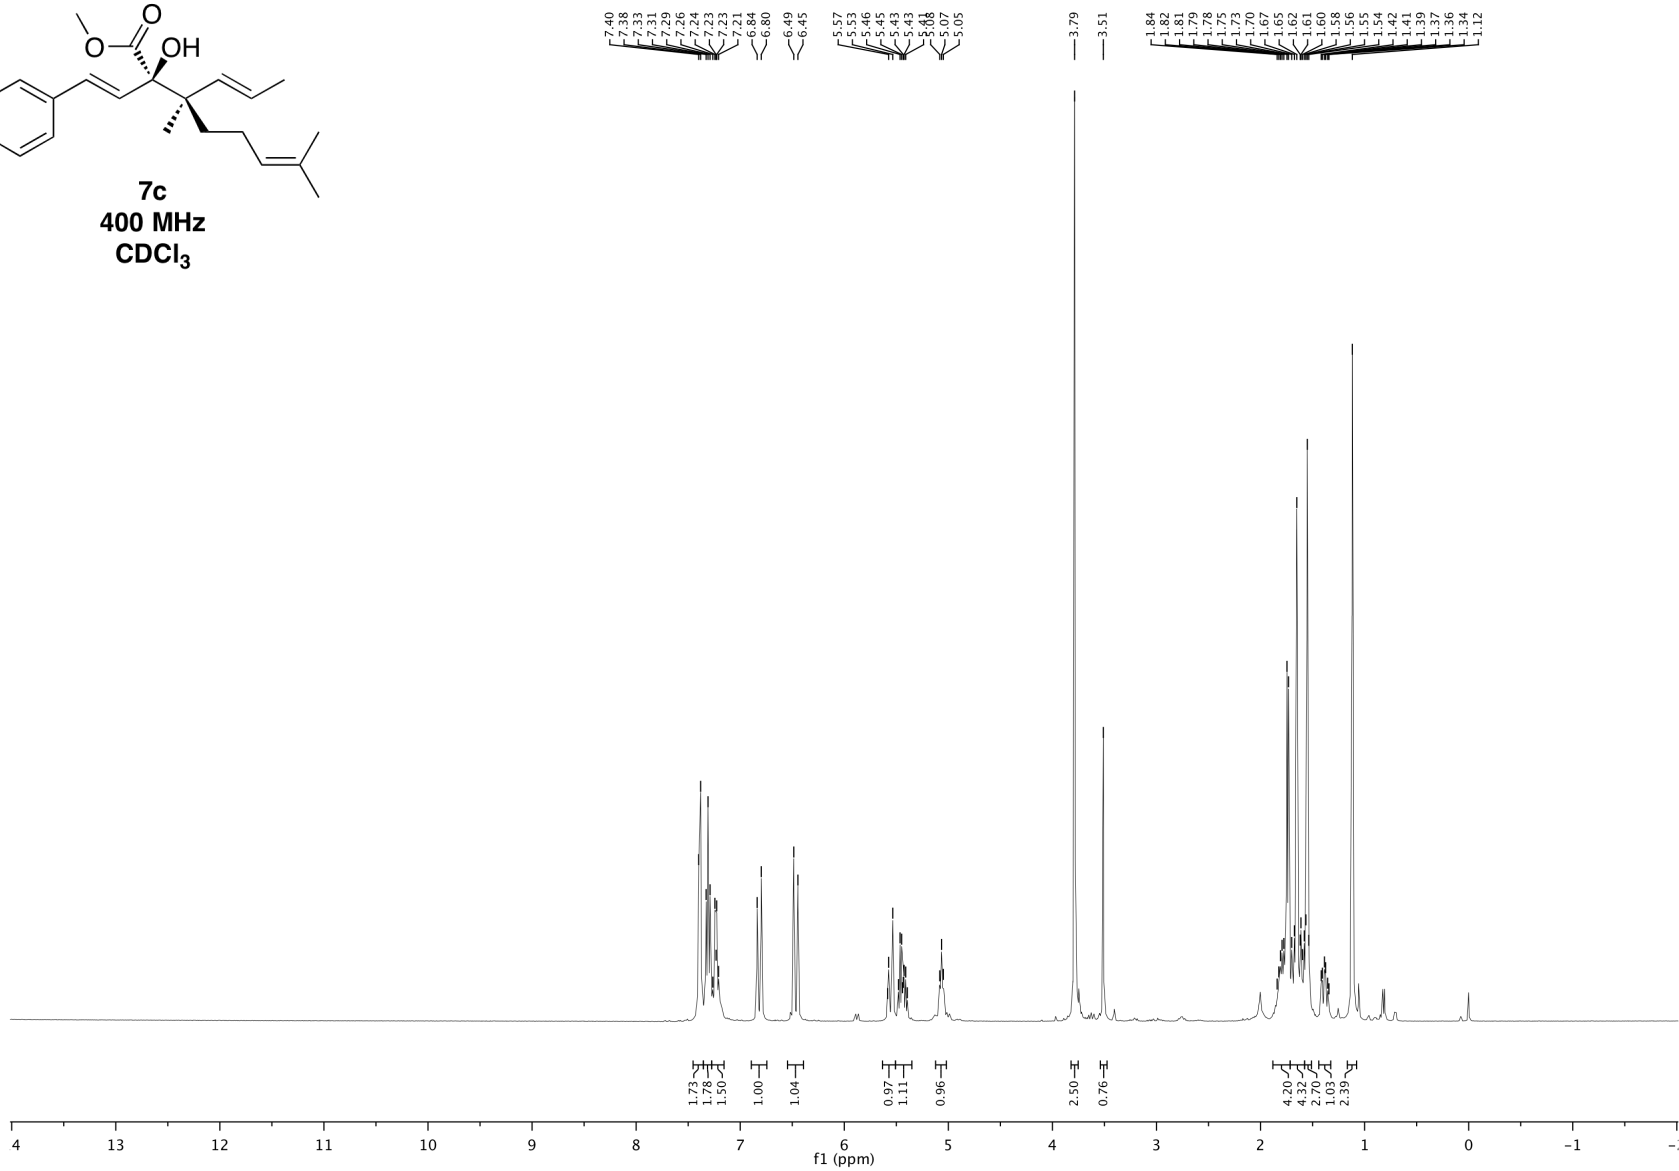

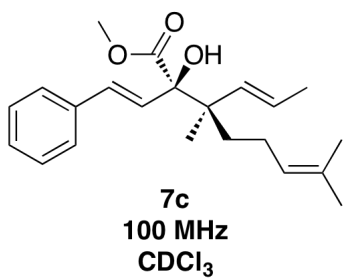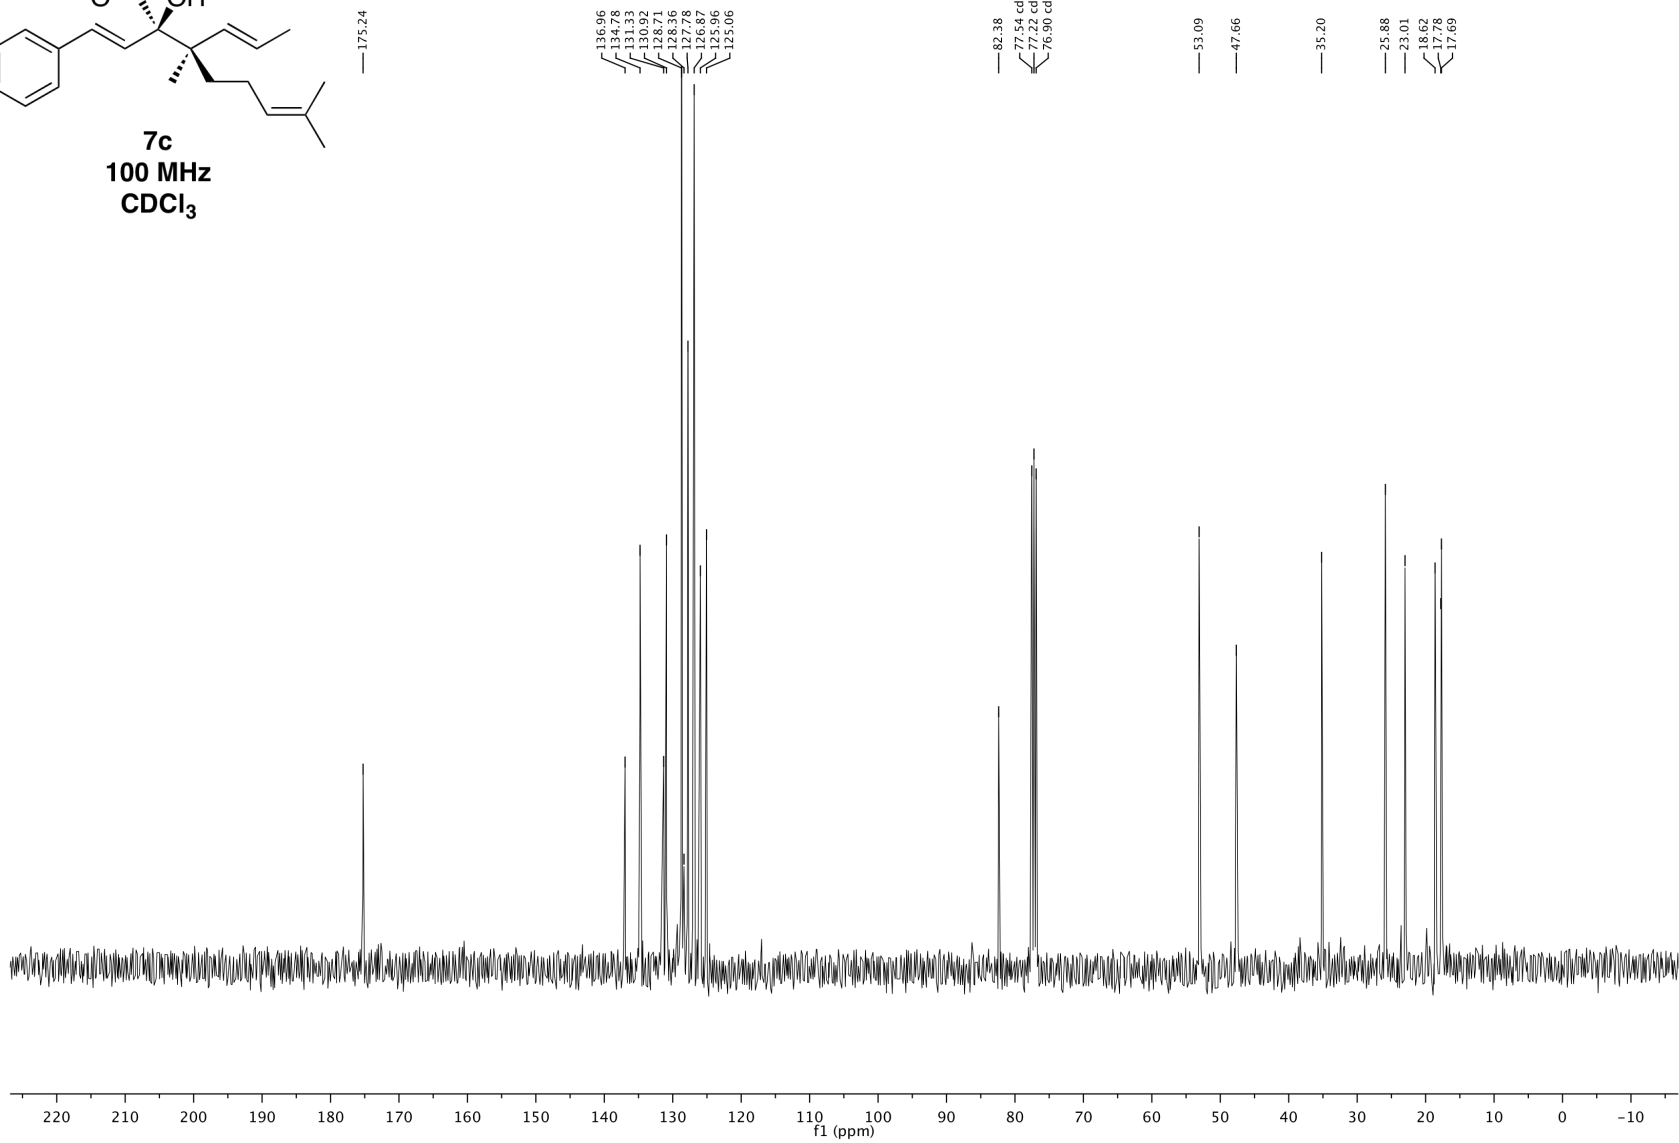

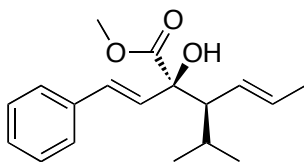

**7d**  
400 MHz  
CDCl<sub>3</sub>

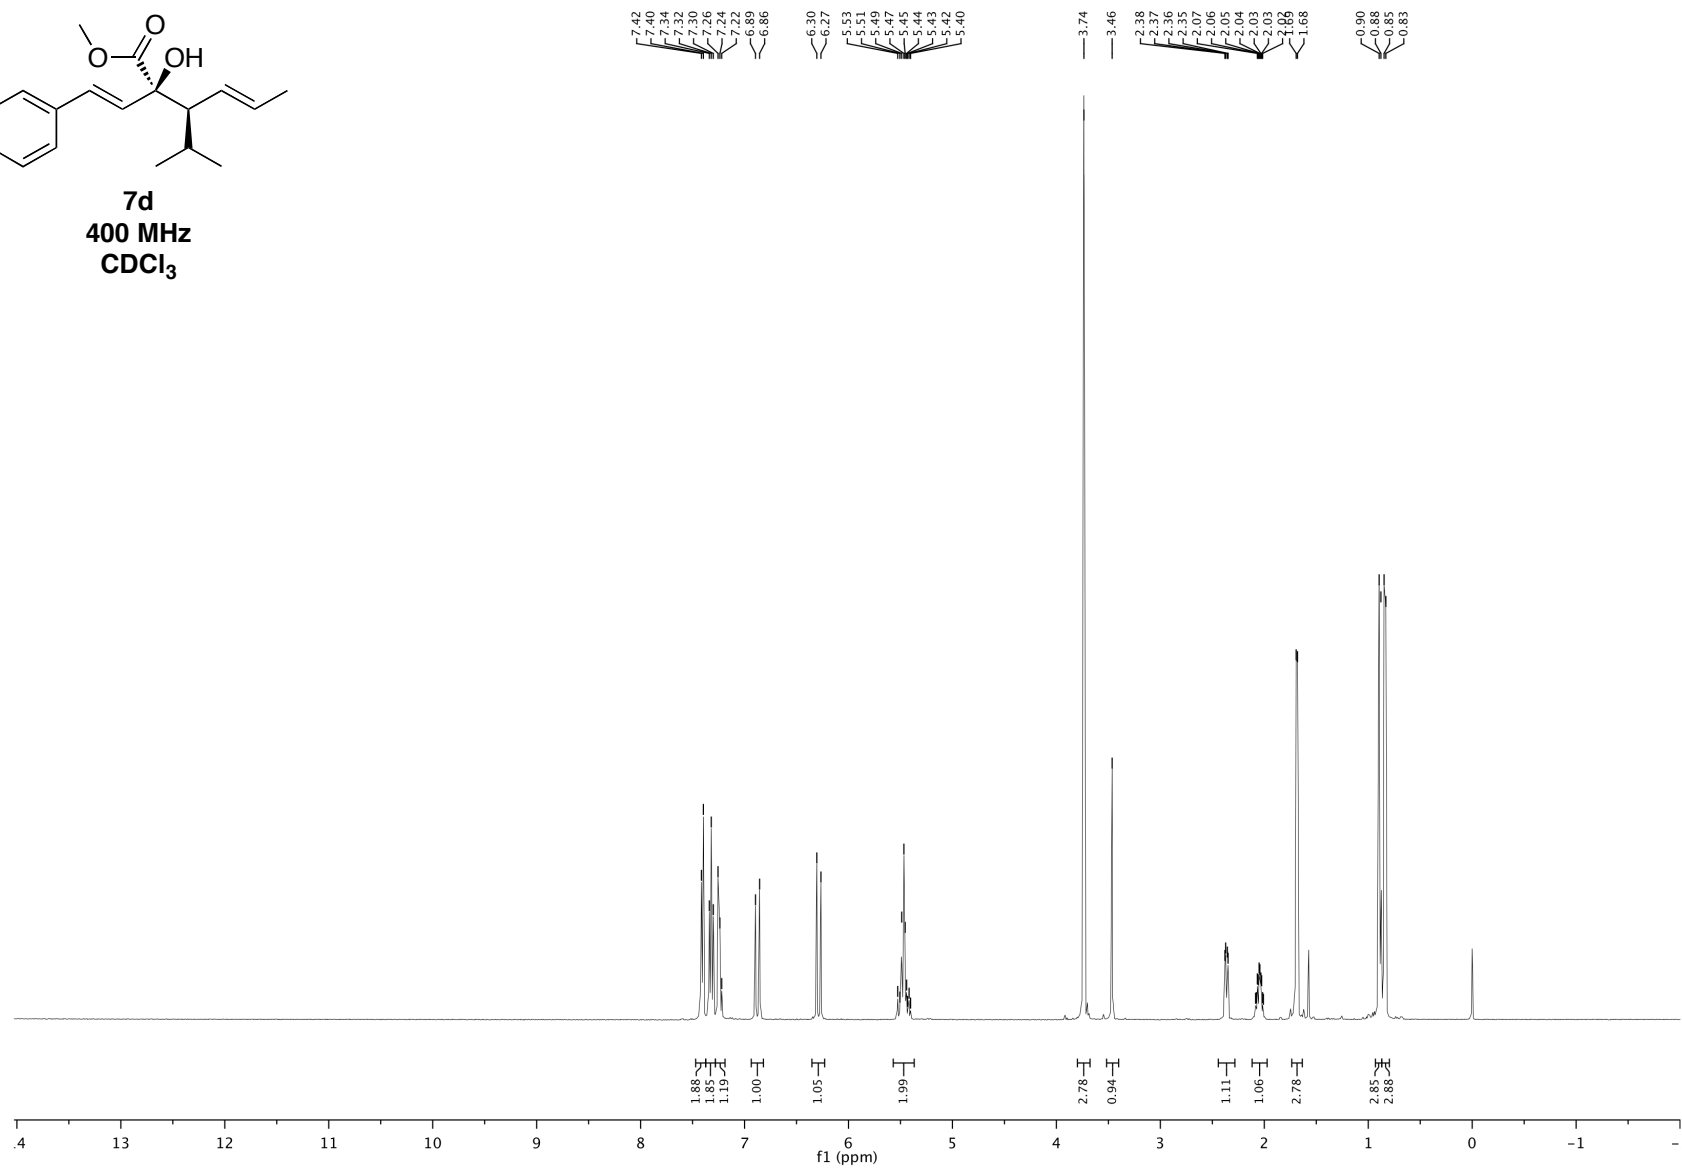

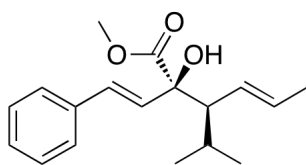

**7d**  
100 MHz  
CDCl<sub>3</sub>

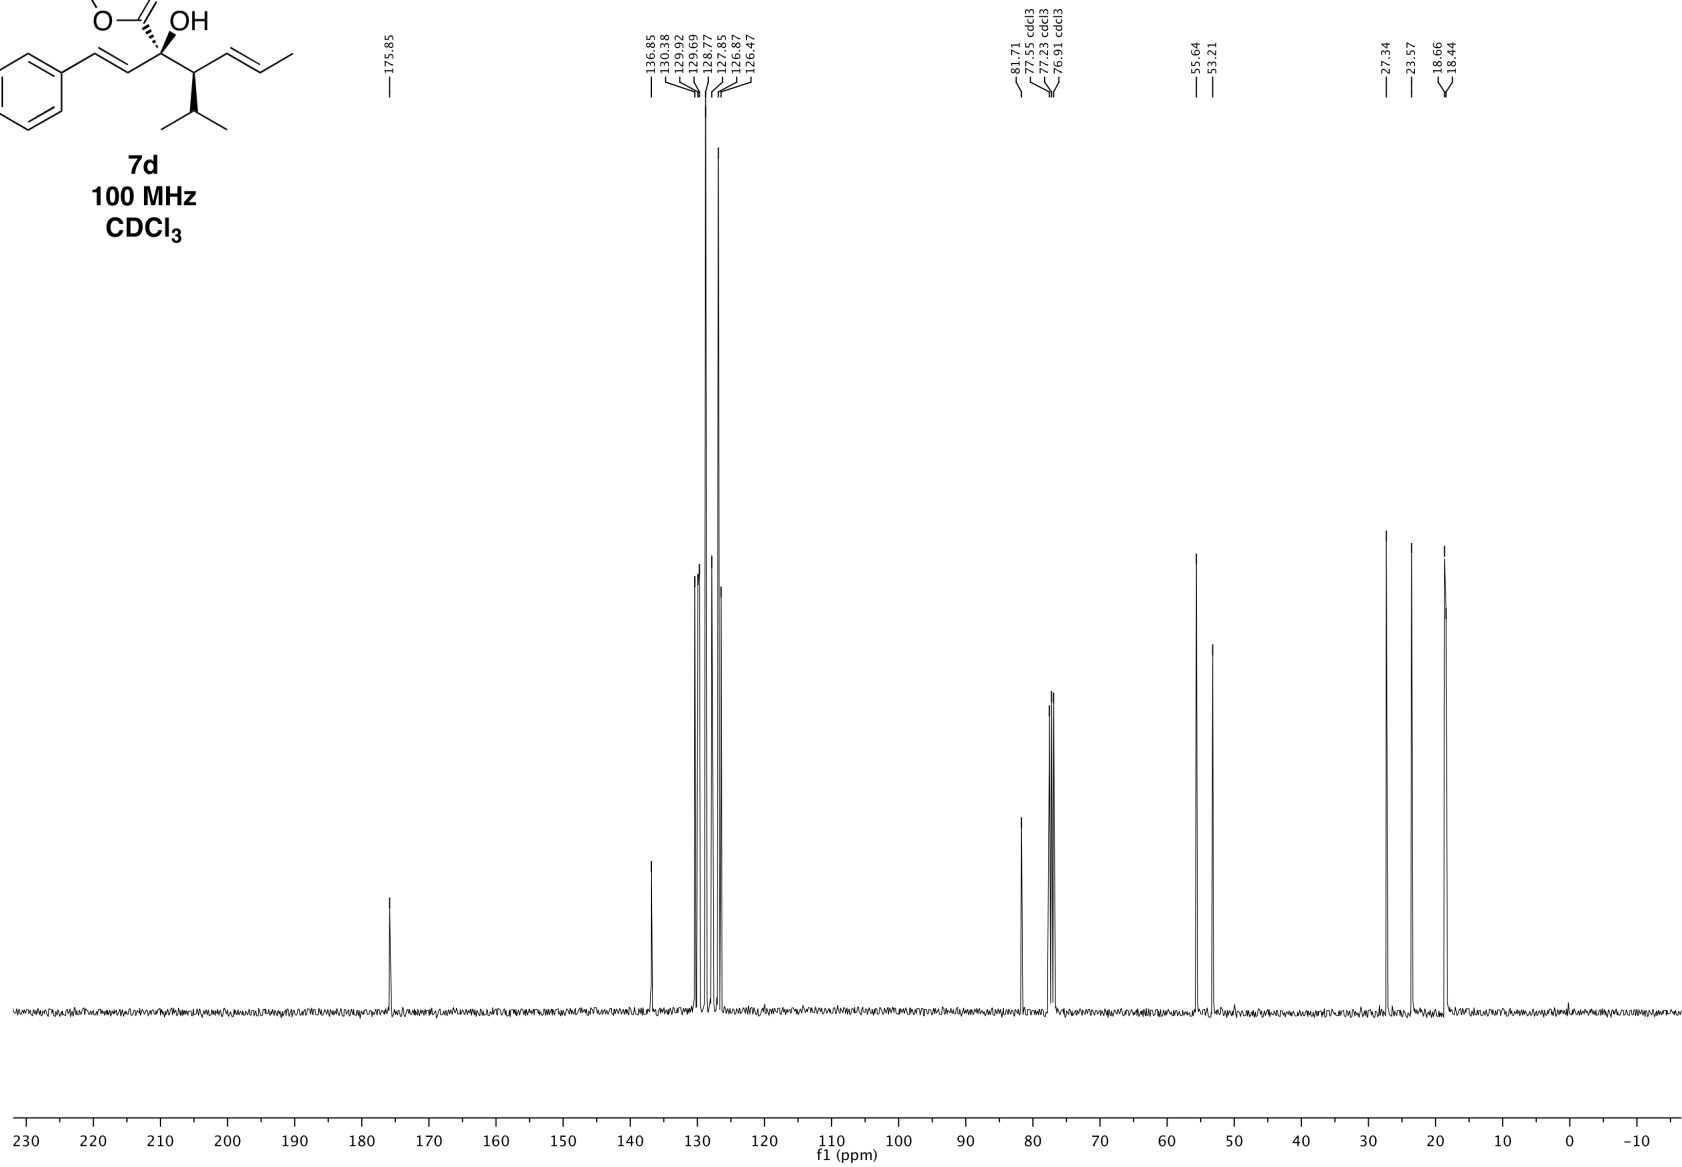

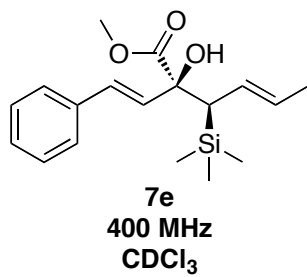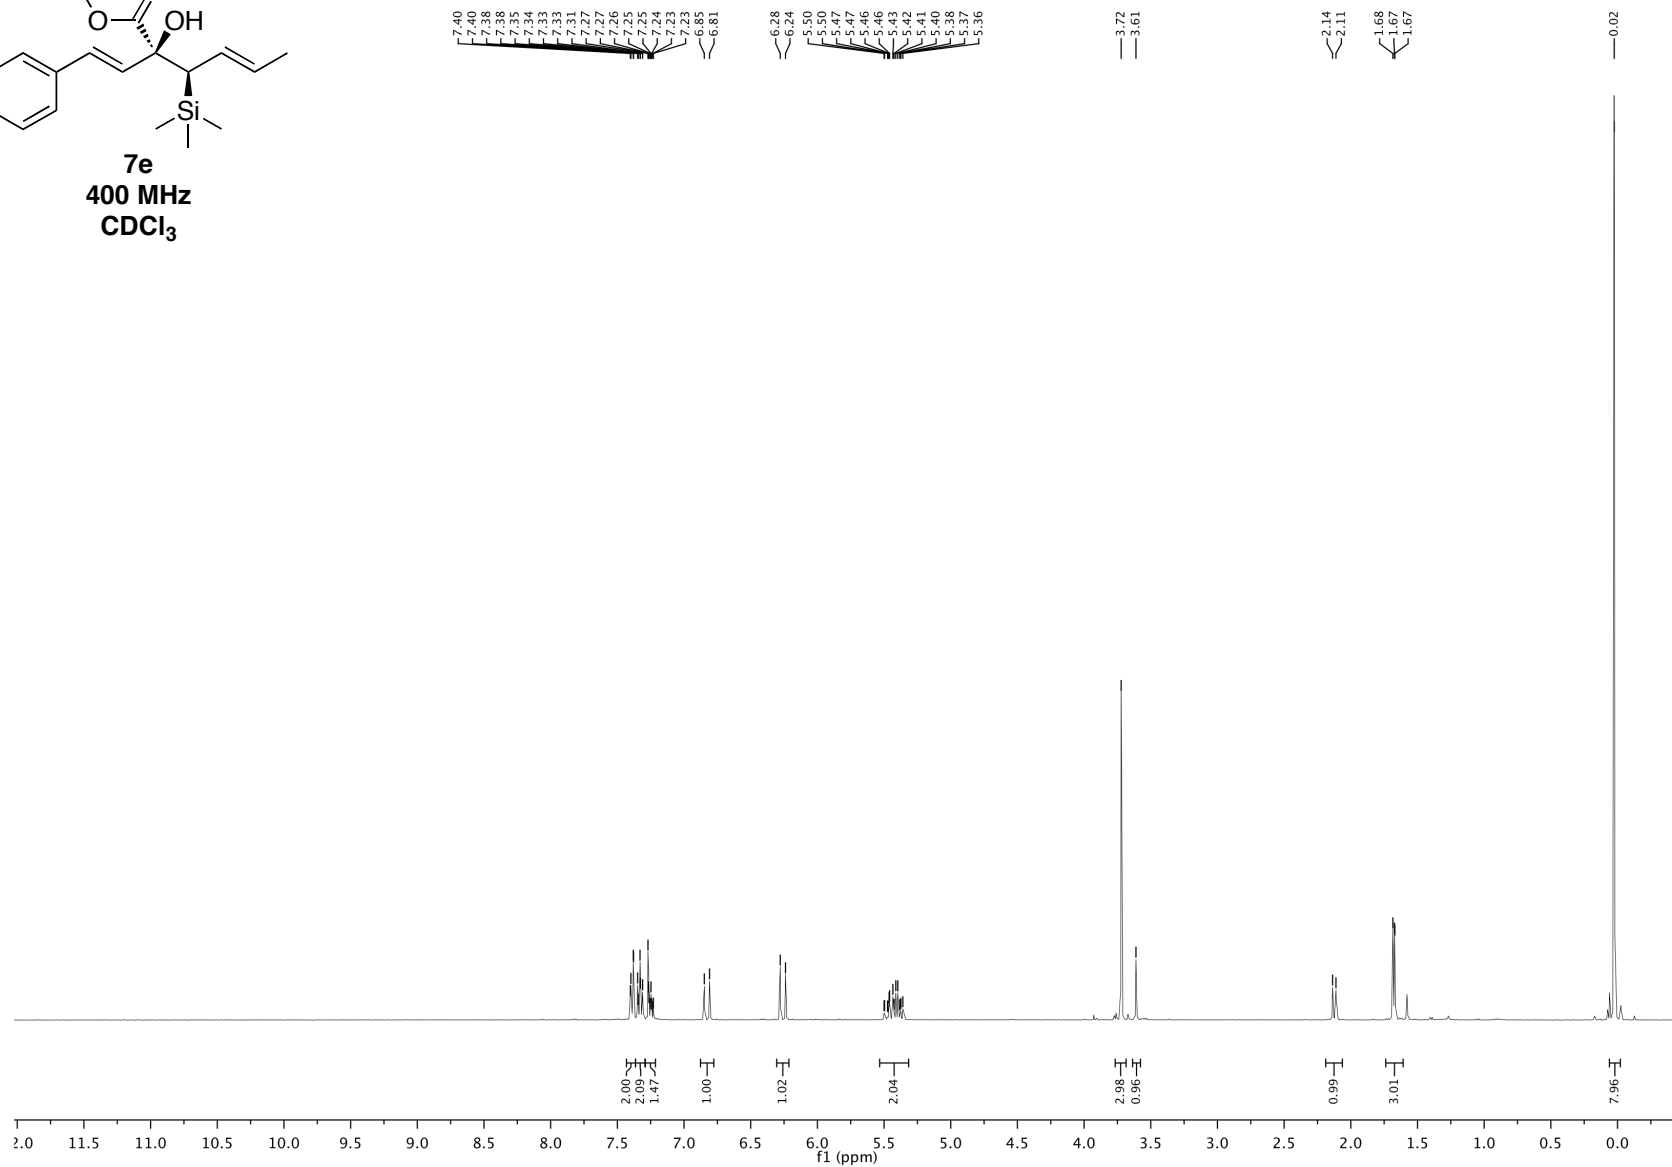

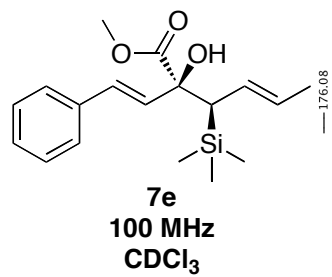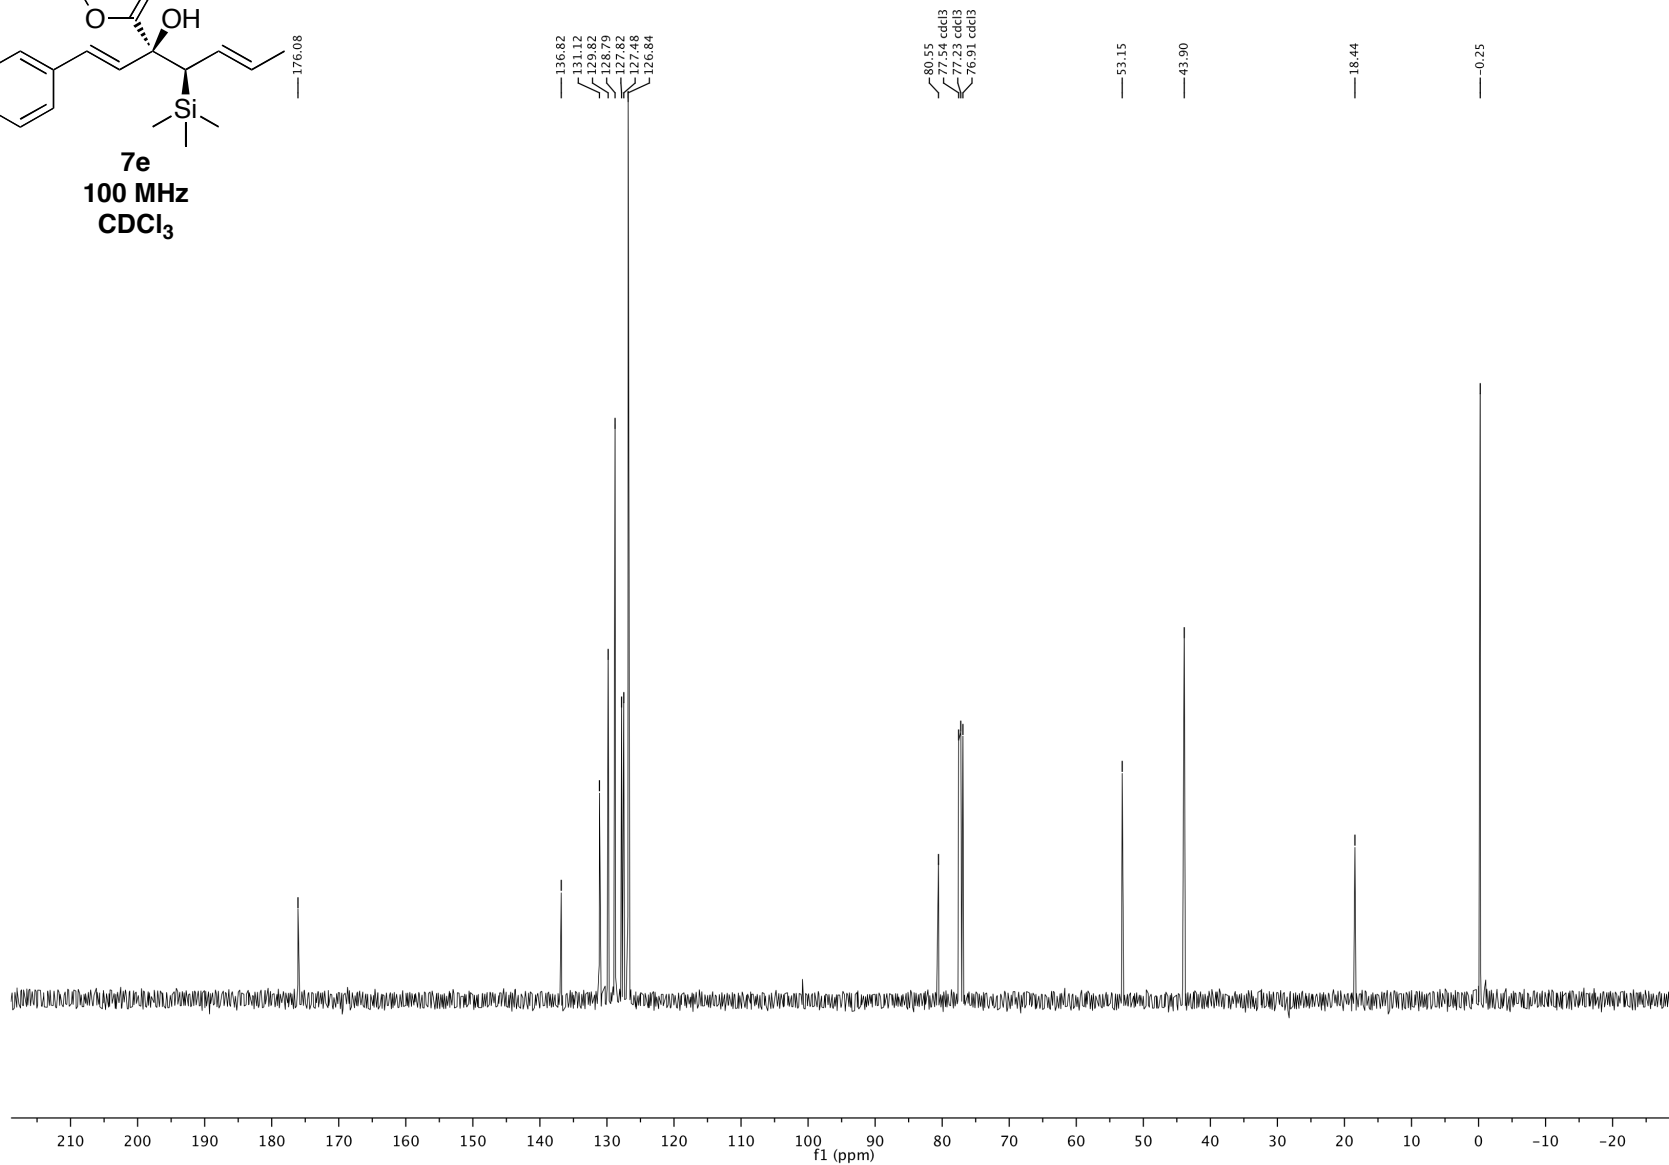



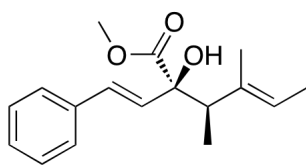

7f  
400 MHz  
CDCl<sub>3</sub>

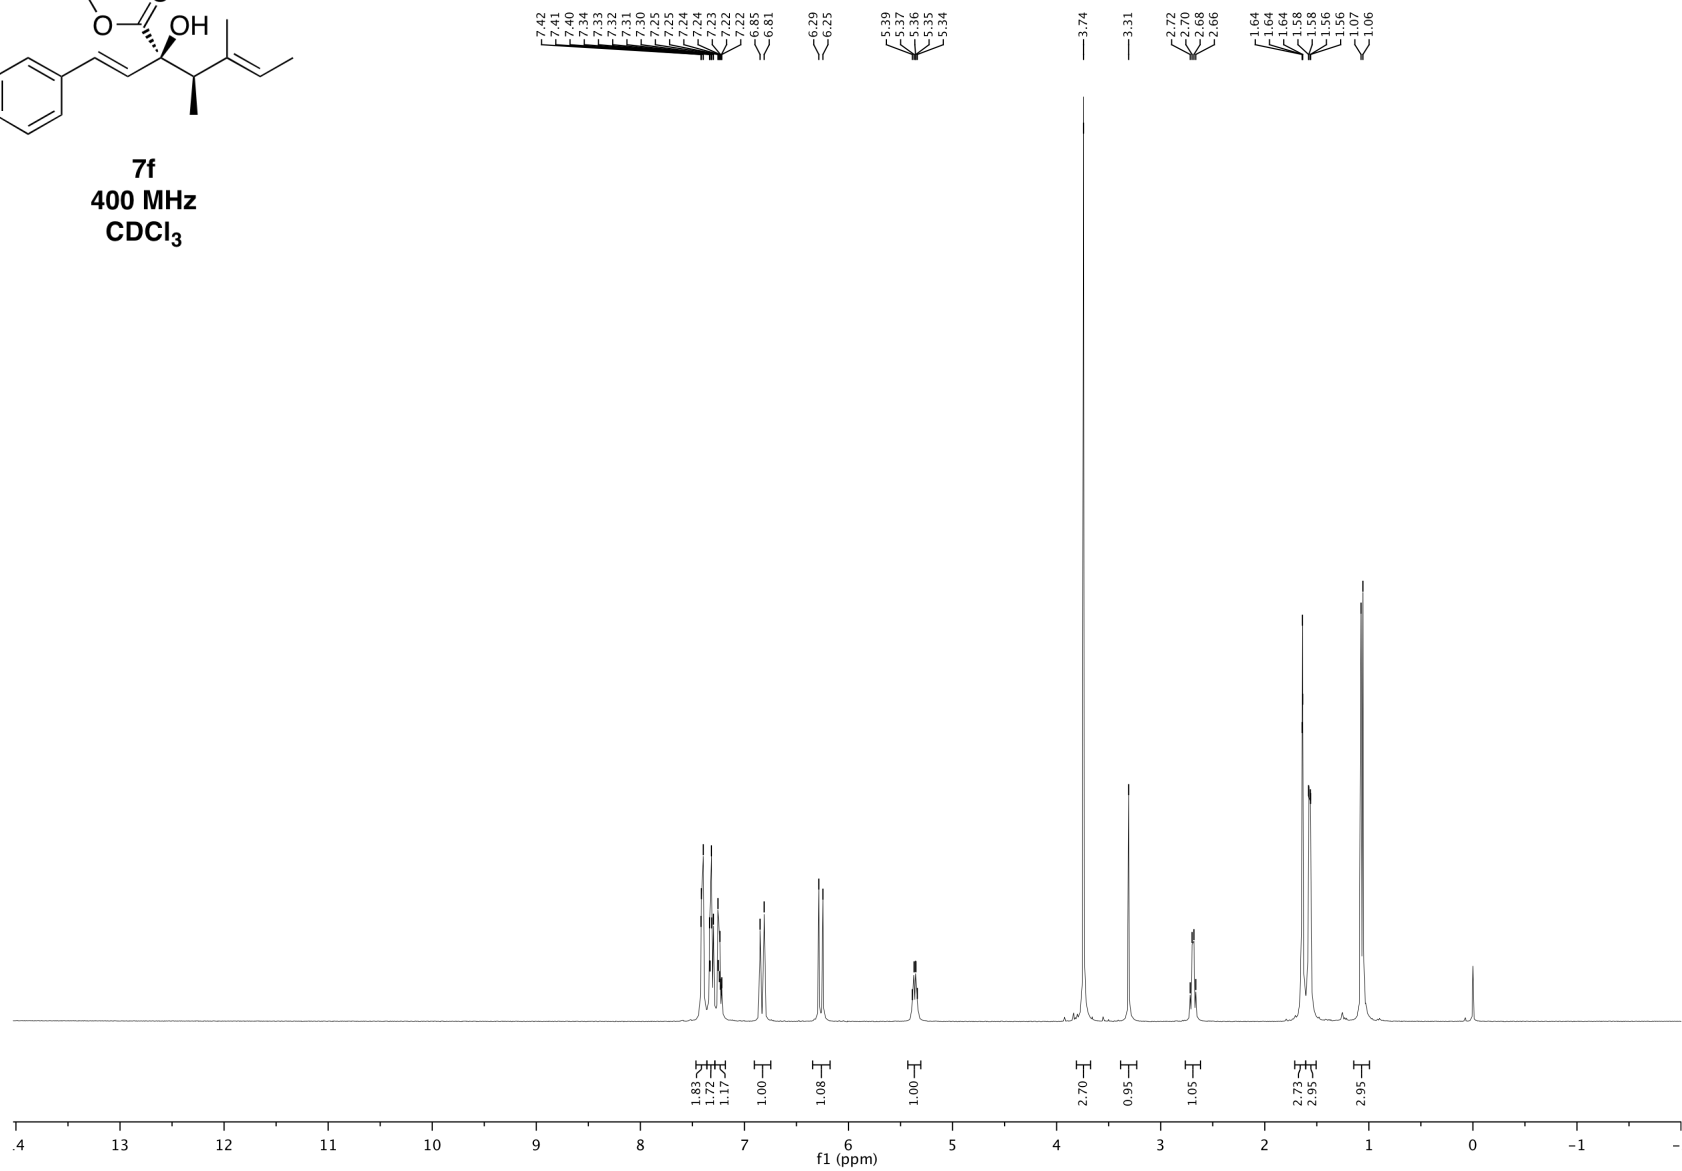

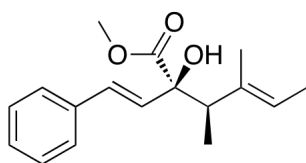

7f  
100 MHz  
CDCl<sub>3</sub>

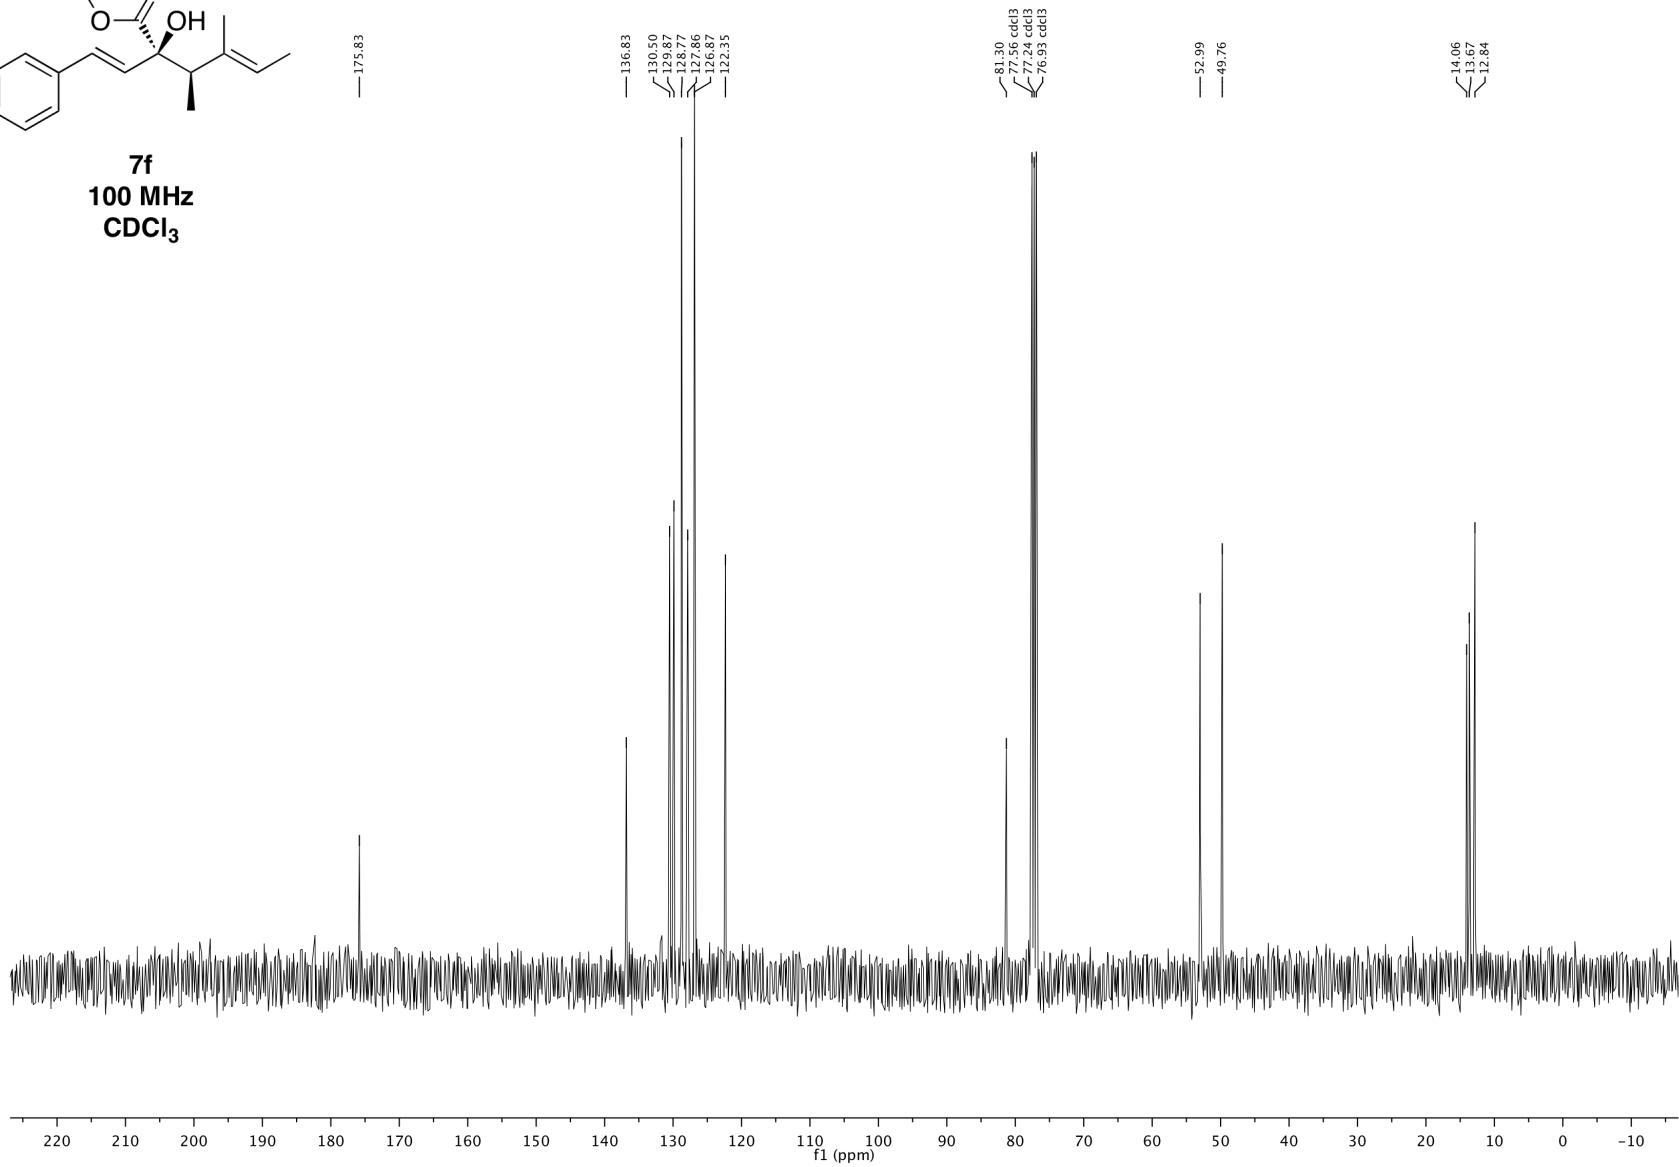

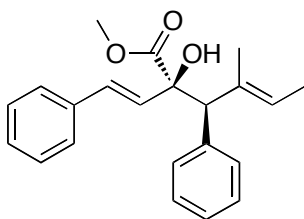

**7g**  
**400 MHz**  
**CDCl<sub>3</sub>**

7.42  
 7.40  
 7.36  
 7.25  
 7.24  
 7.24  
 7.23  
 7.22  
 7.21  
 7.19  
 7.18  
 7.17  
 7.16  
 7.16  
 7.15  
 7.14  
 7.14  
 7.13  
 7.13  
 6.65  
 6.61  
 6.20  
 5.74  
 5.72  
 5.71  
 5.69

3.89  
 3.81  
 3.61

1.61  
 1.60  
 1.59  
 1.58

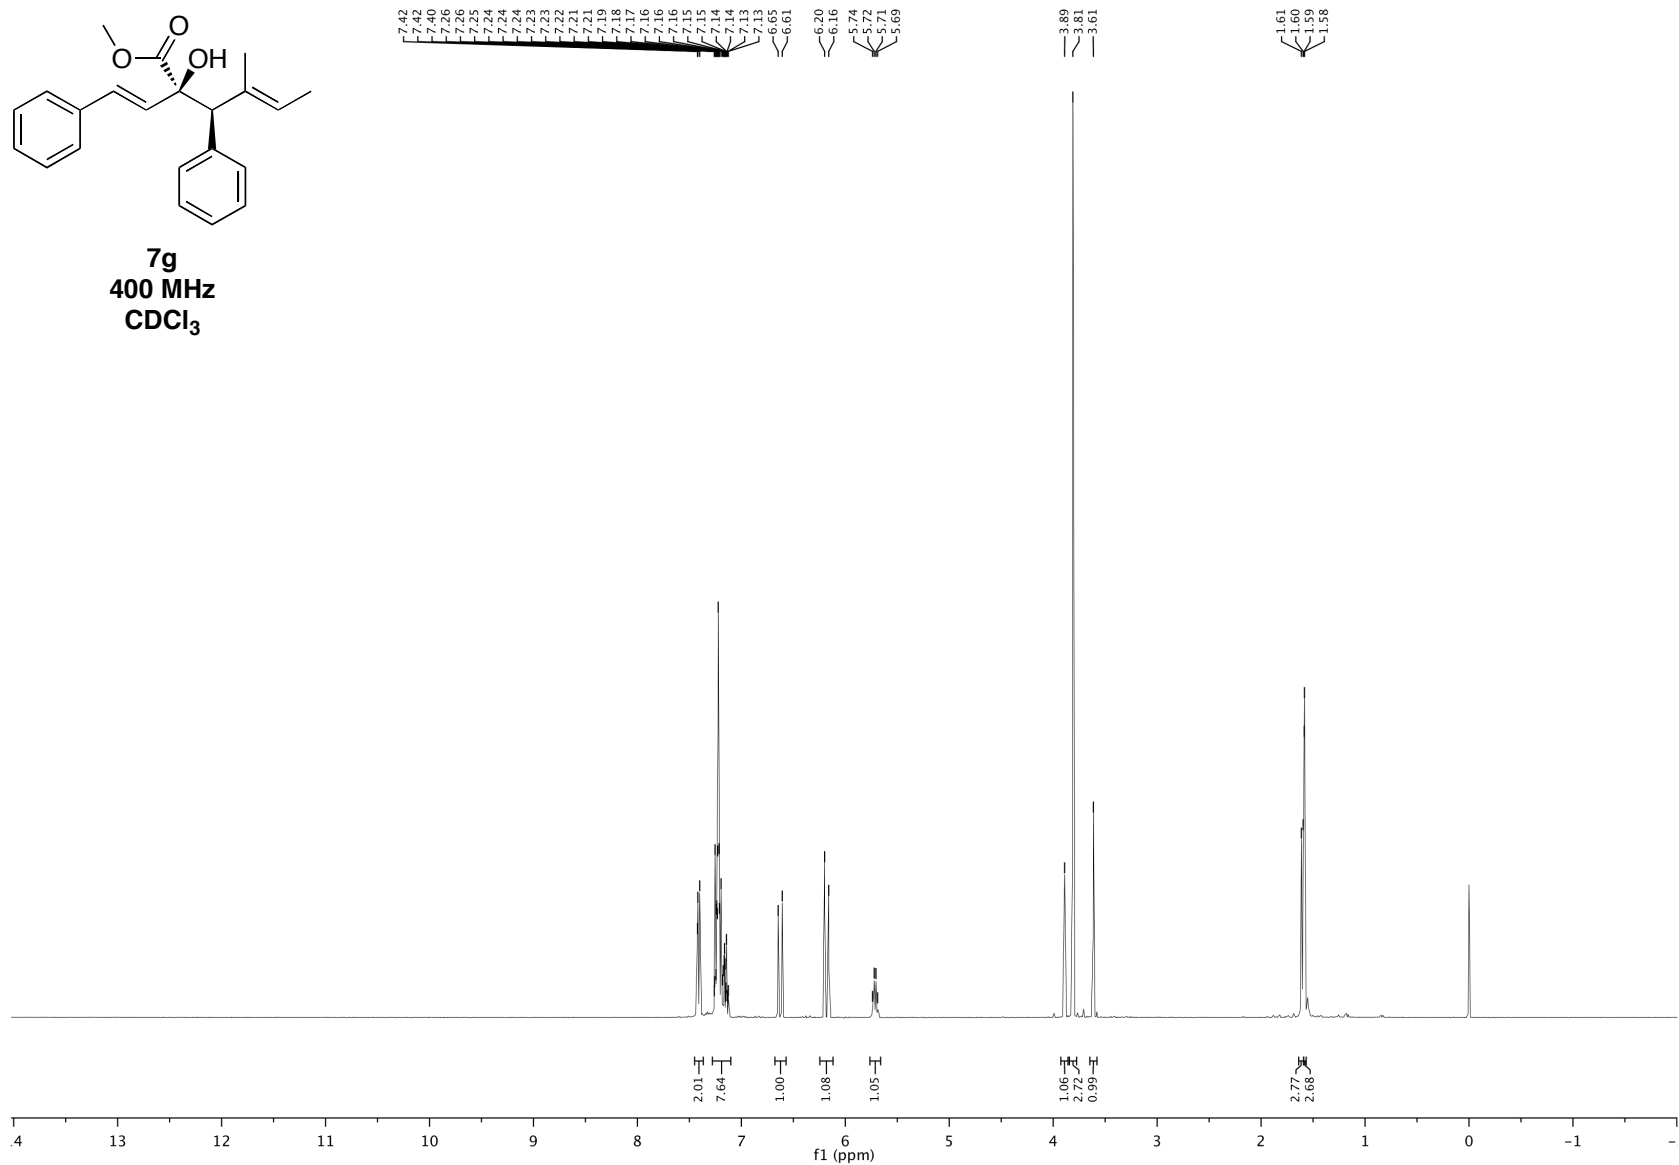

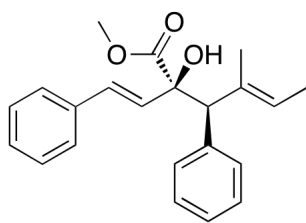

**7g**  
100 MHz  
CDCl<sub>3</sub>

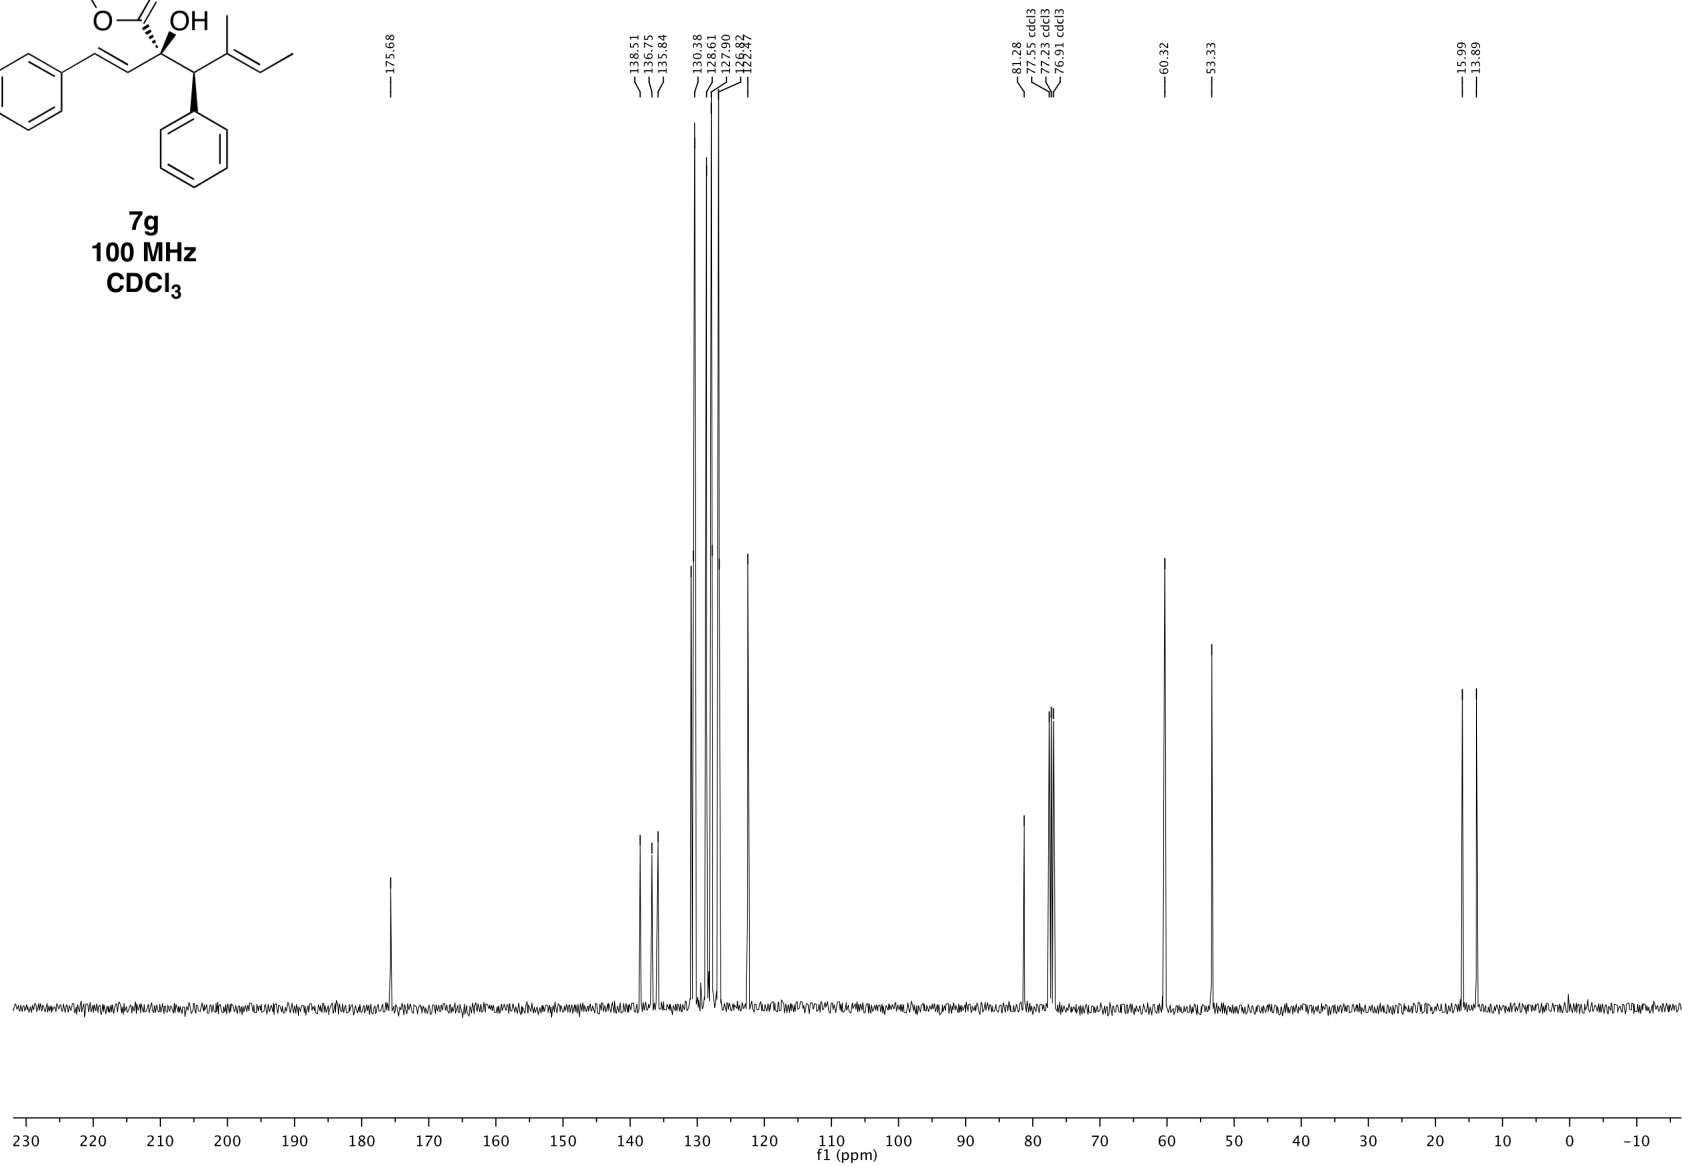

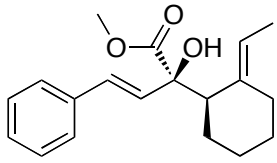

7h  
400 MHz  
CDCl<sub>3</sub>

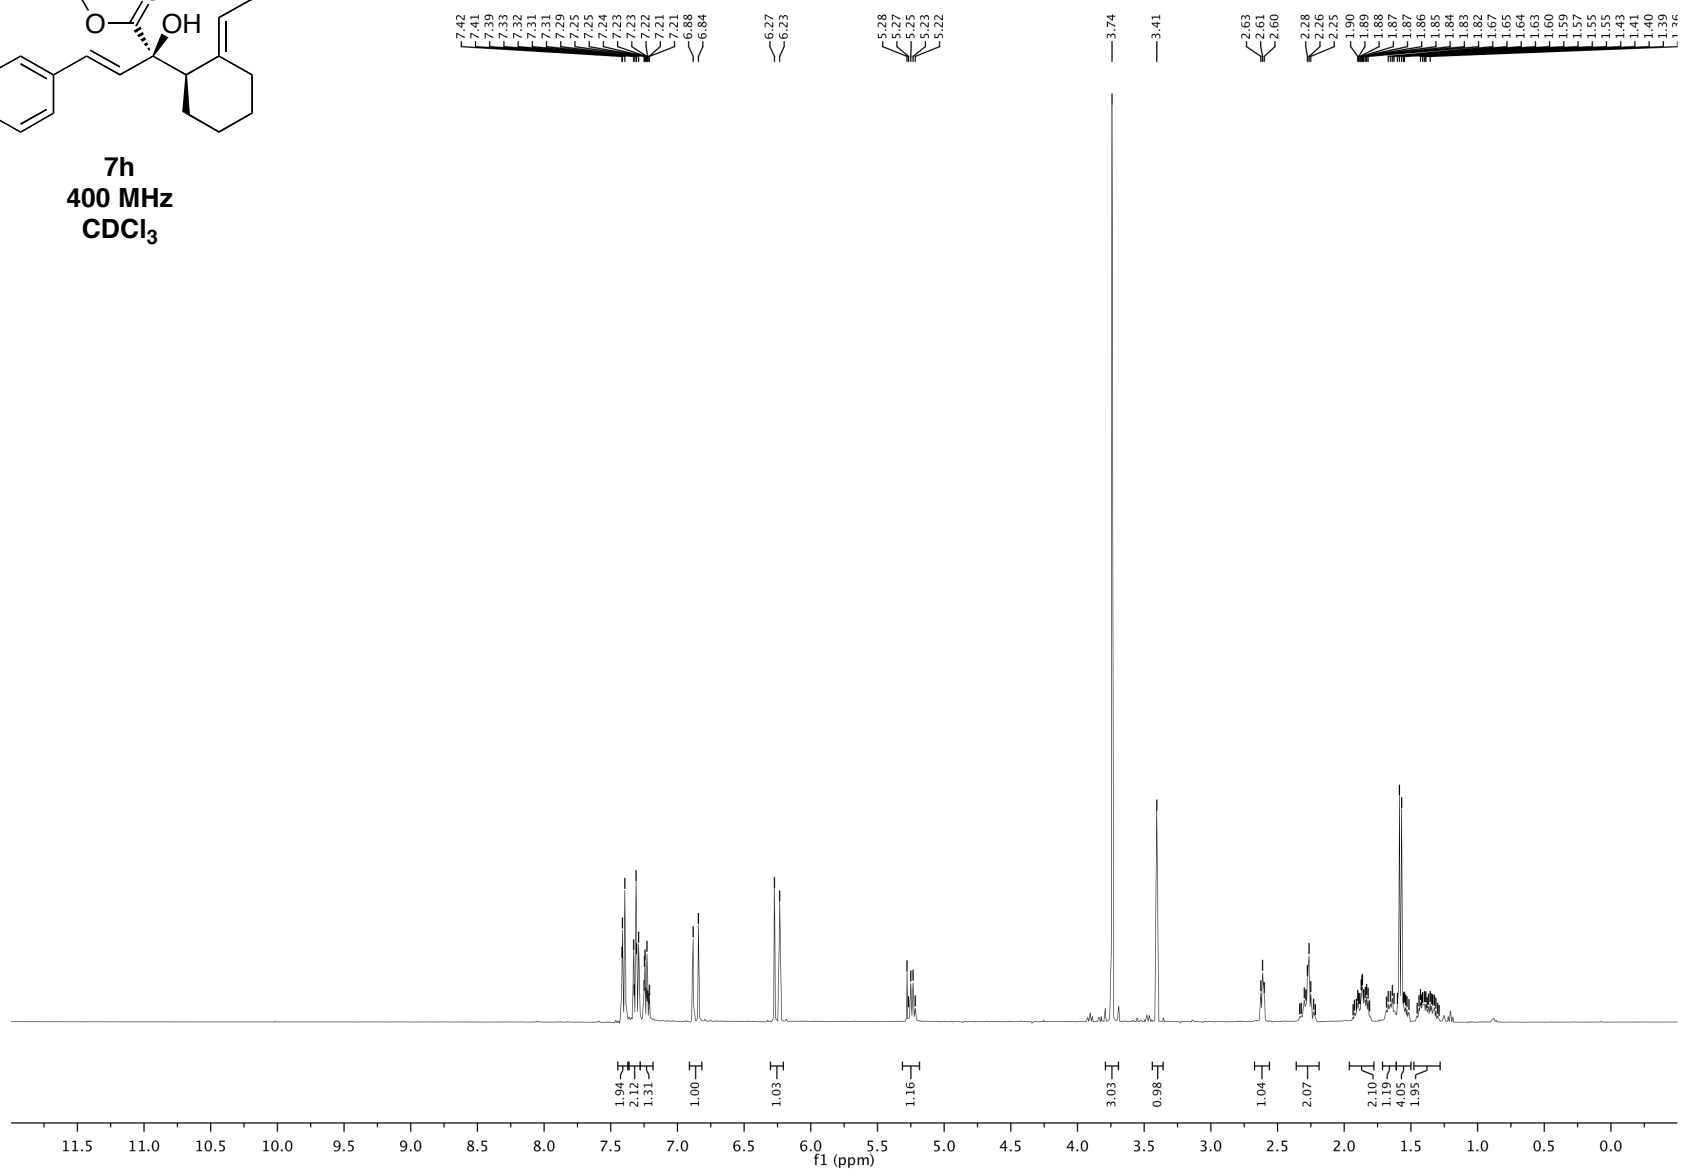

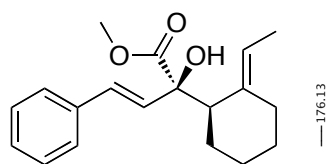

7h  
100 MHz  
CDCl<sub>3</sub>

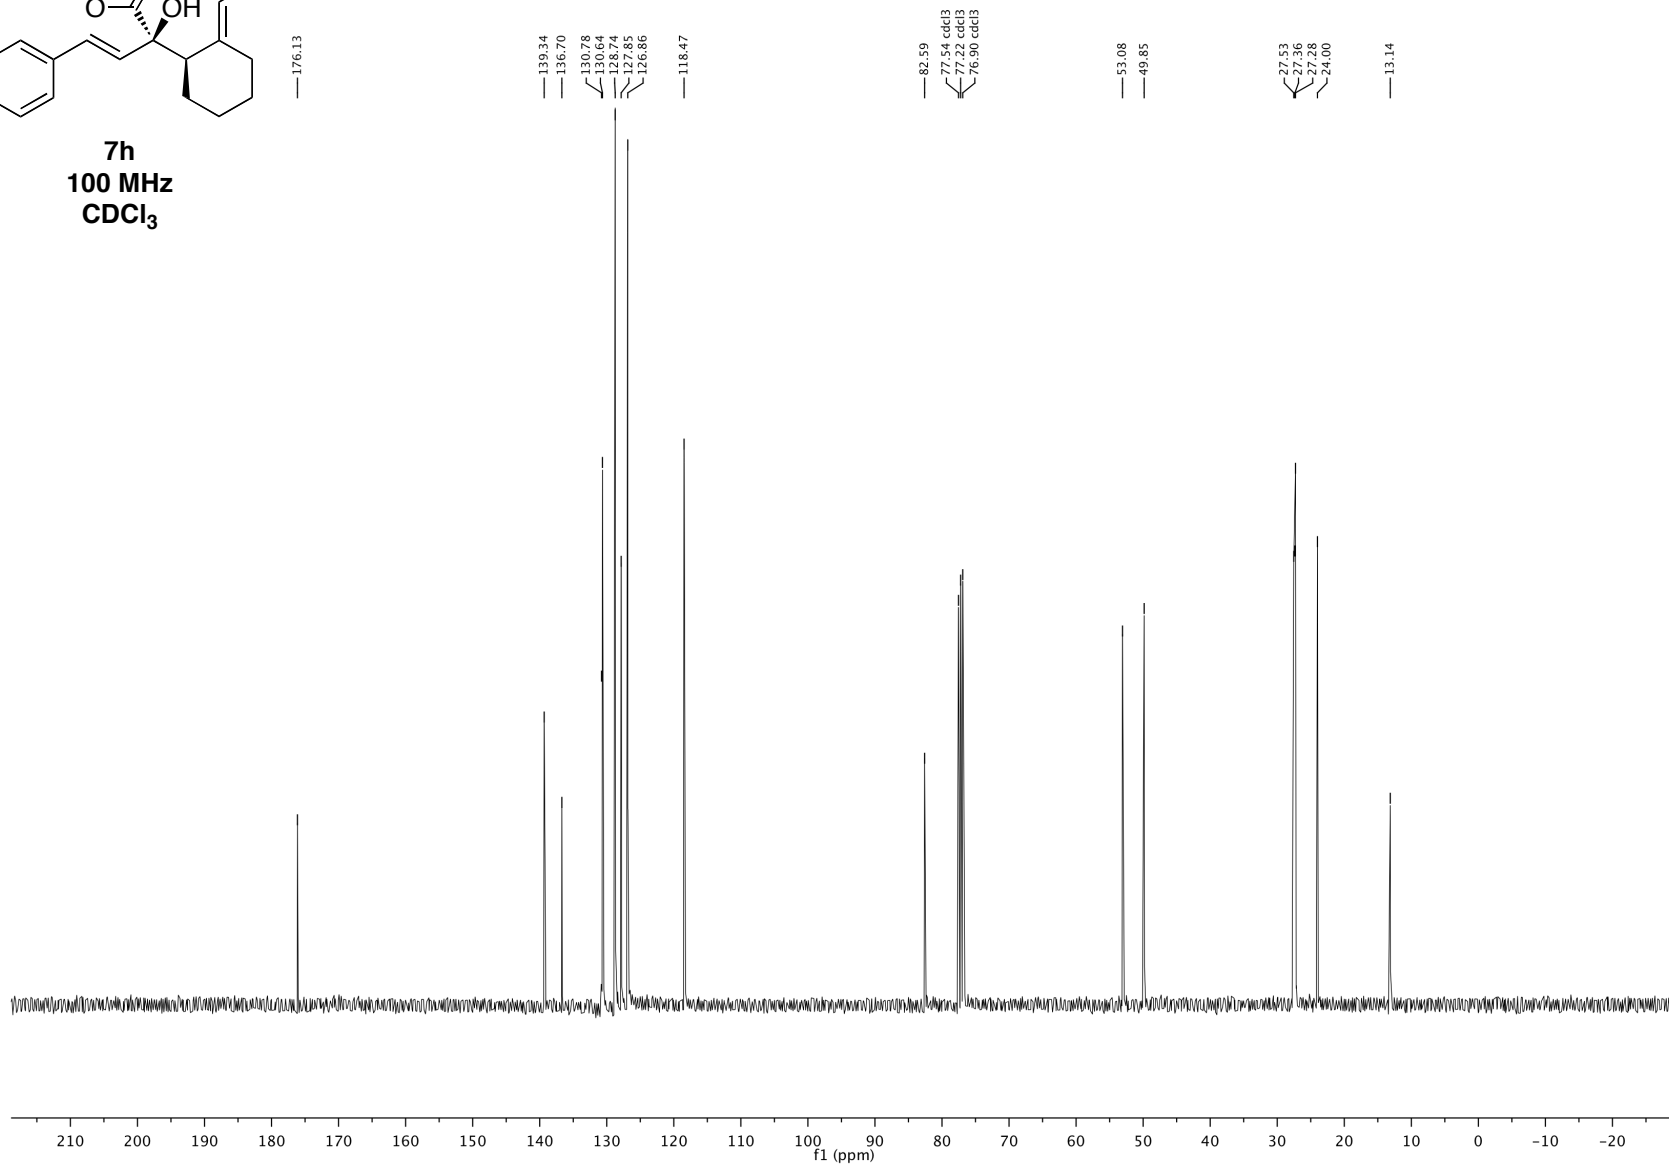

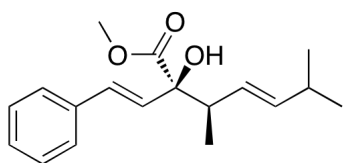

7i  
400 MHz  
CDCl<sub>3</sub>

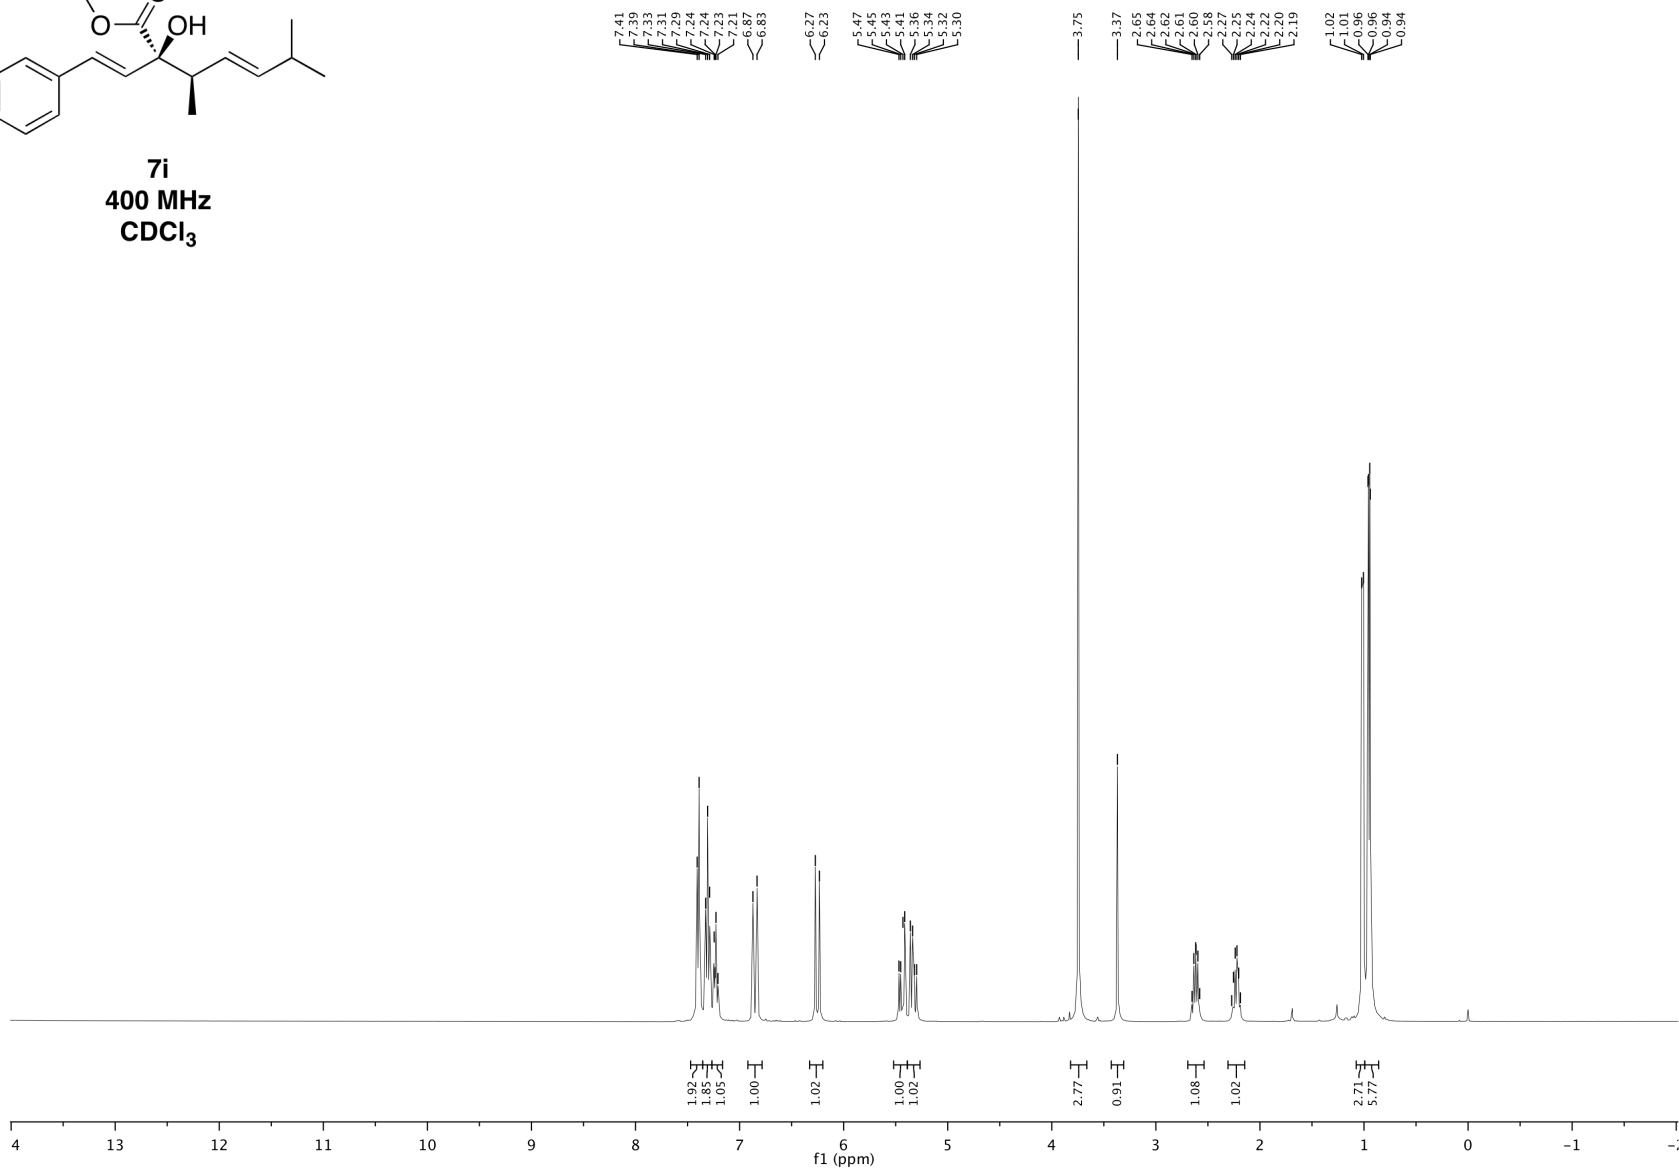

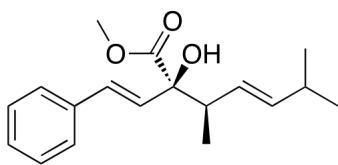

7i  
100 MHz  
CDCl<sub>3</sub>

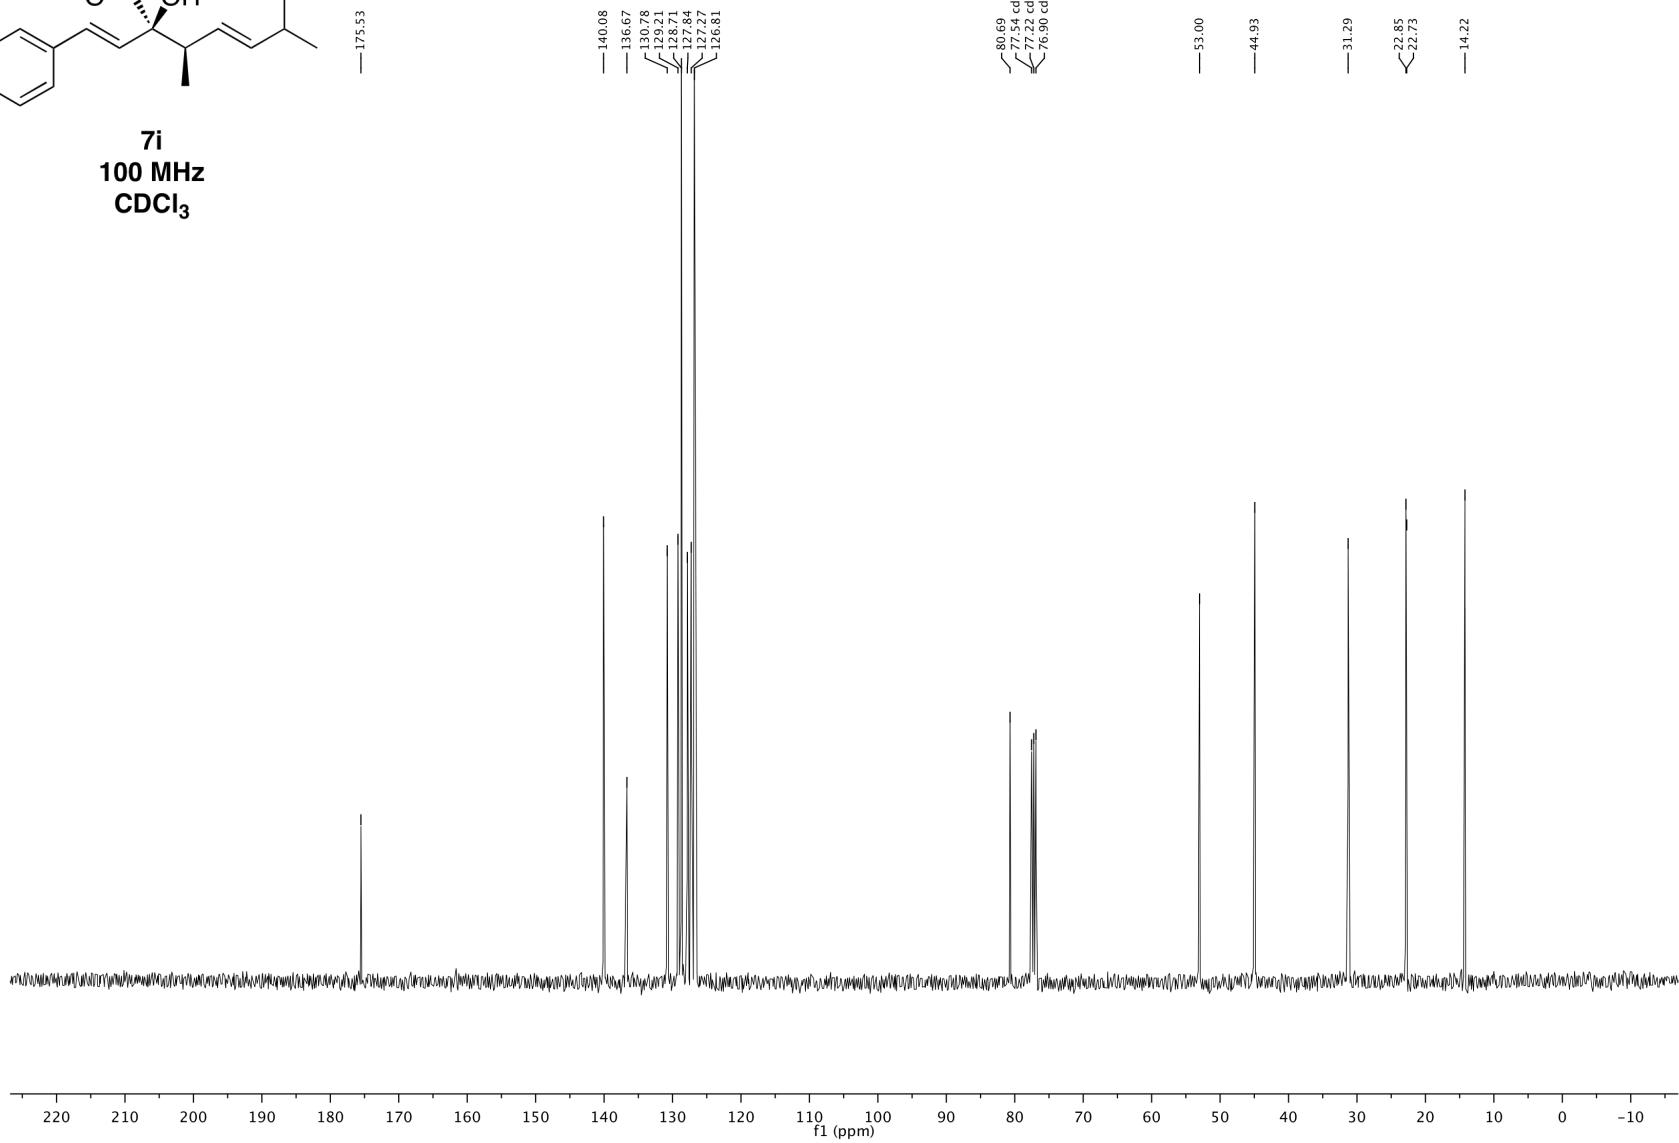



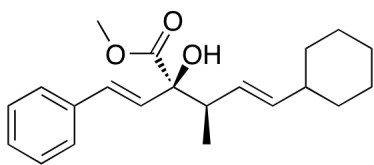

7j  
400 MHz  
CDCl<sub>3</sub>

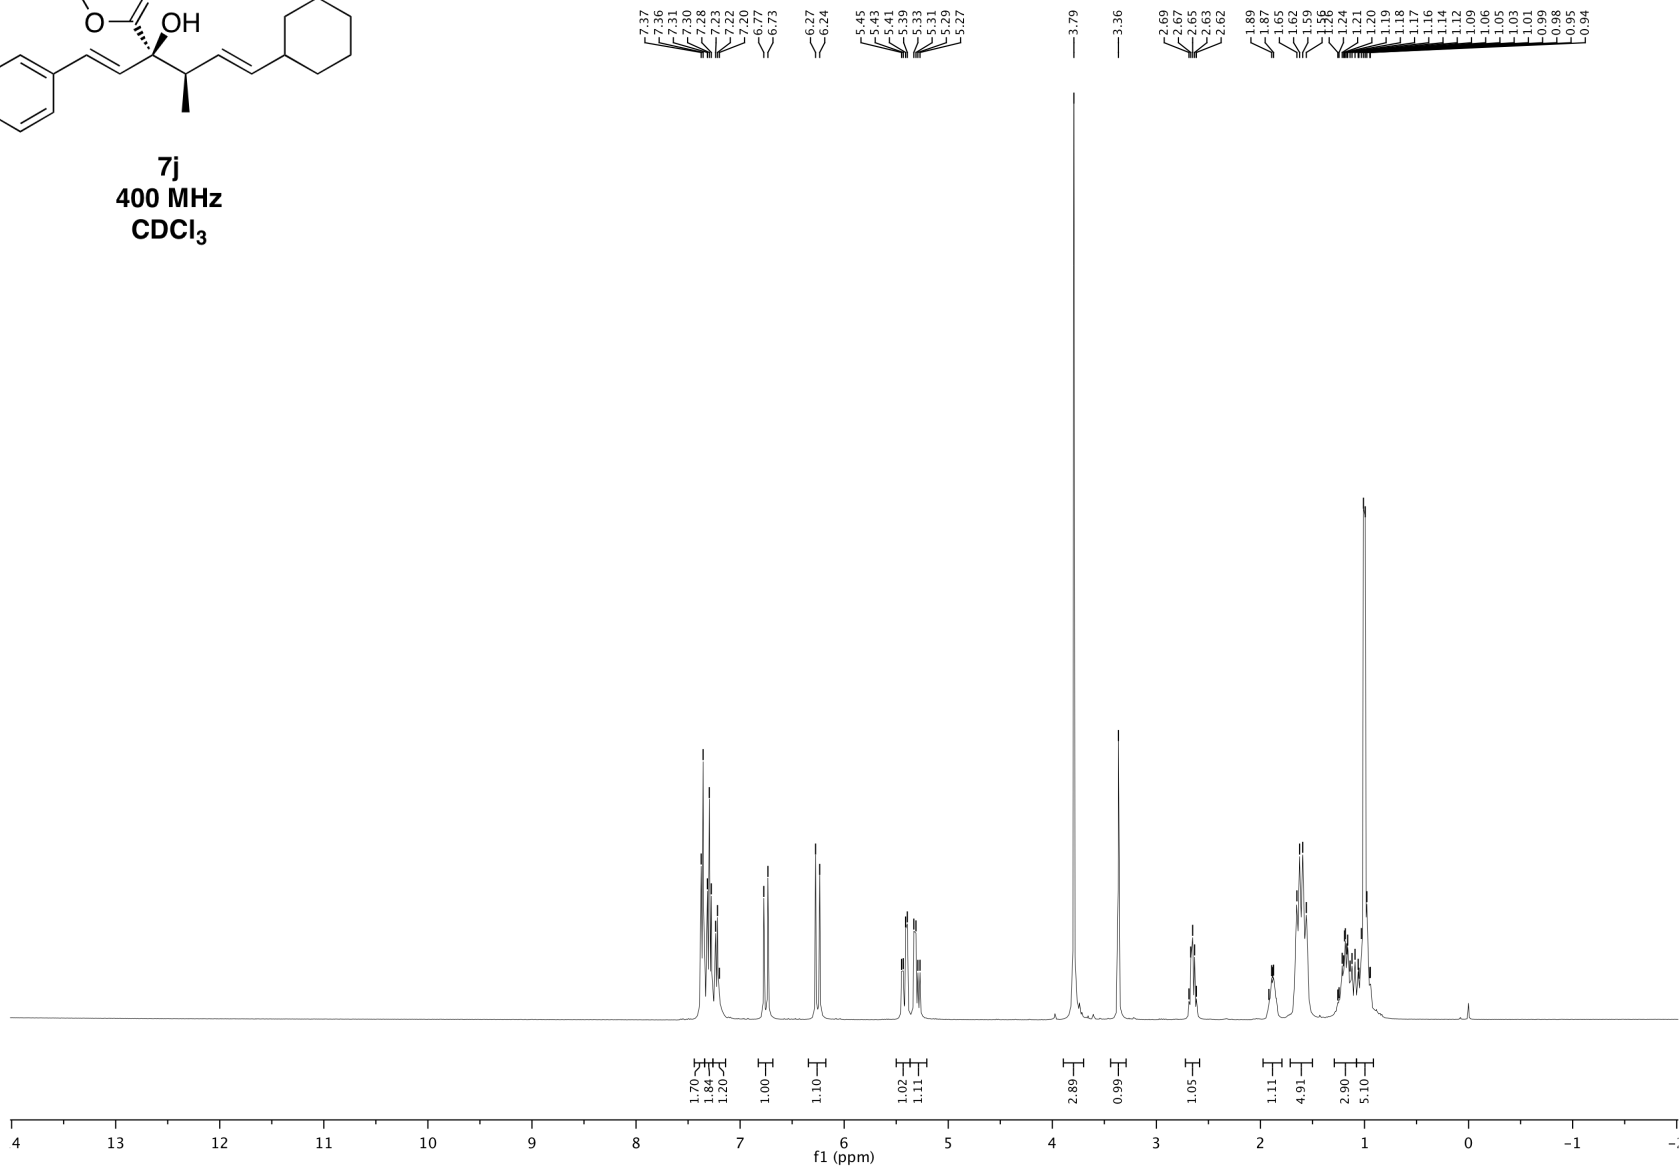

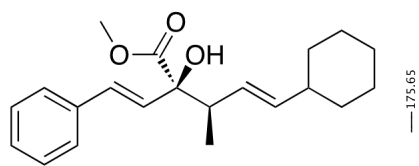

7j  
100 MHz  
CDCl<sub>3</sub>

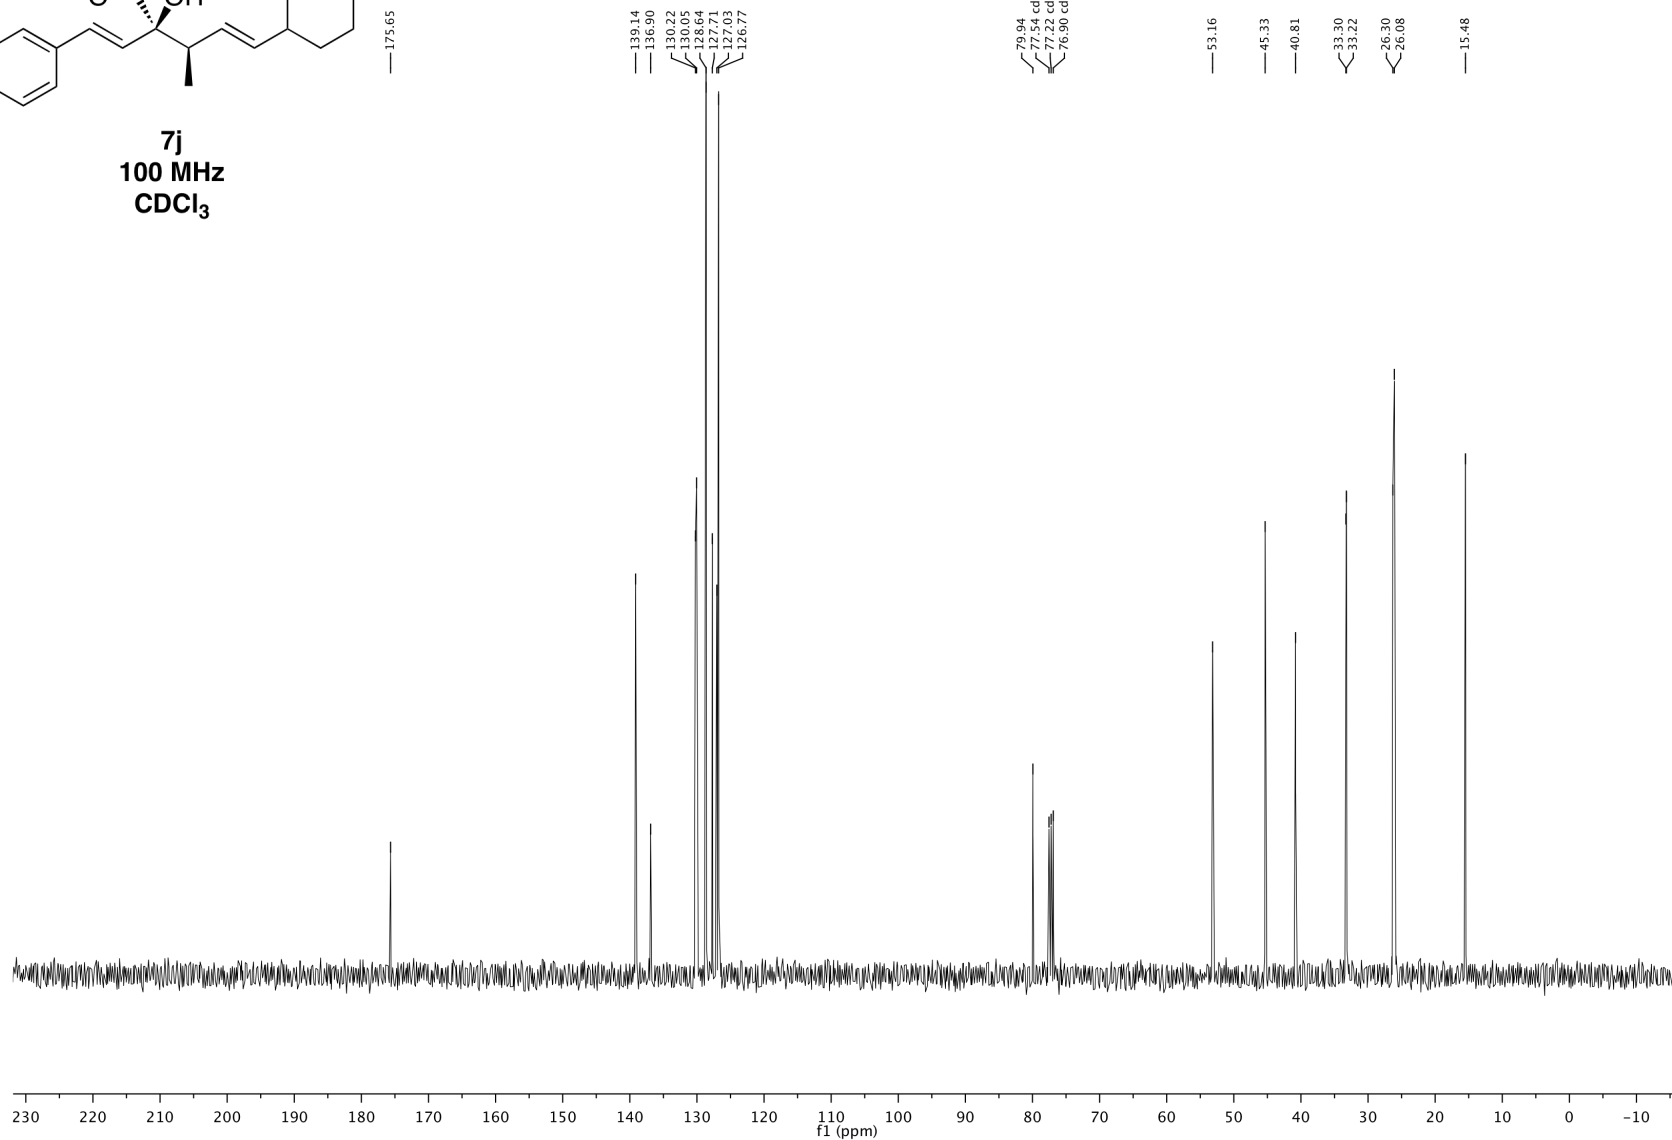

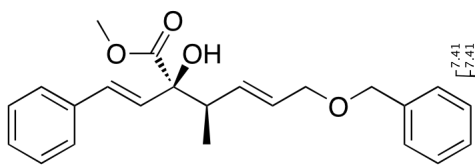

**7k**  
**400 MHz**  
**CDCl<sub>3</sub>**

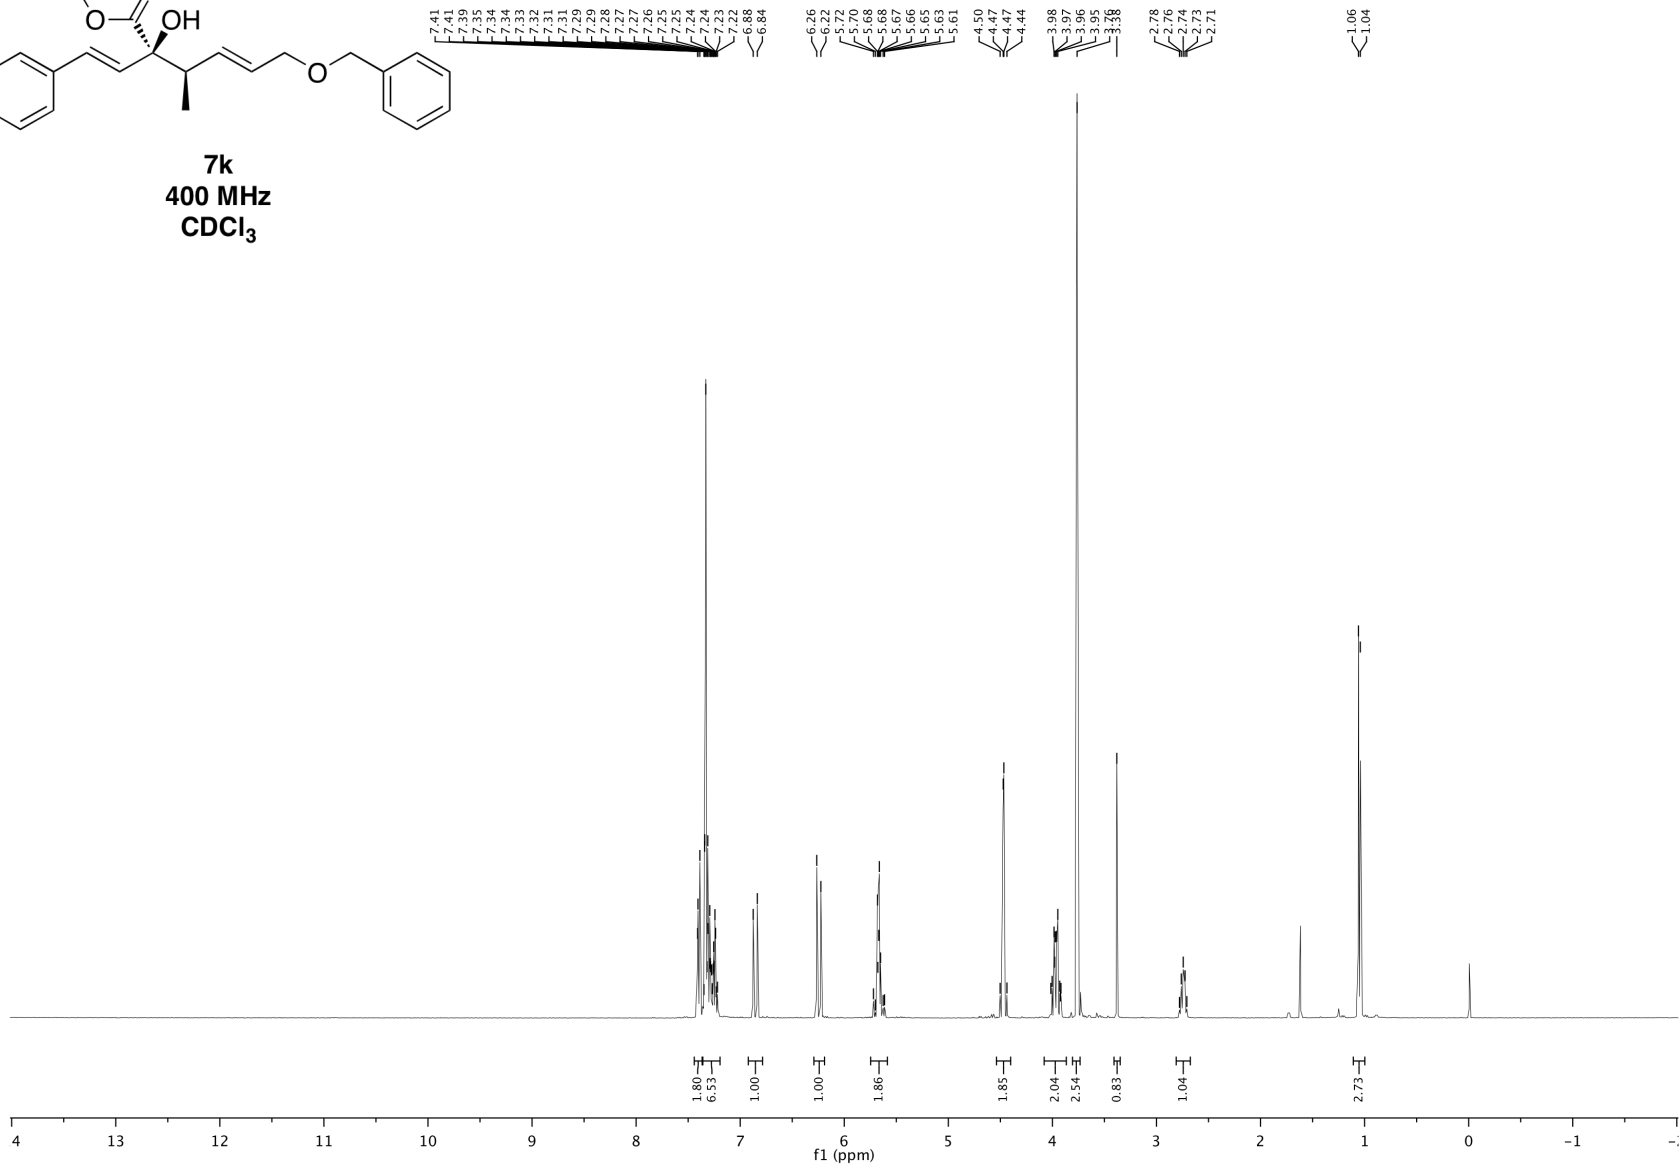

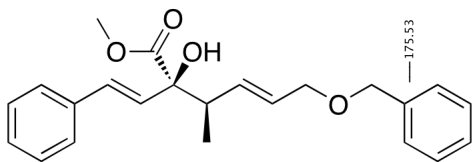

7k  
100 MHz  
CDCl<sub>3</sub>

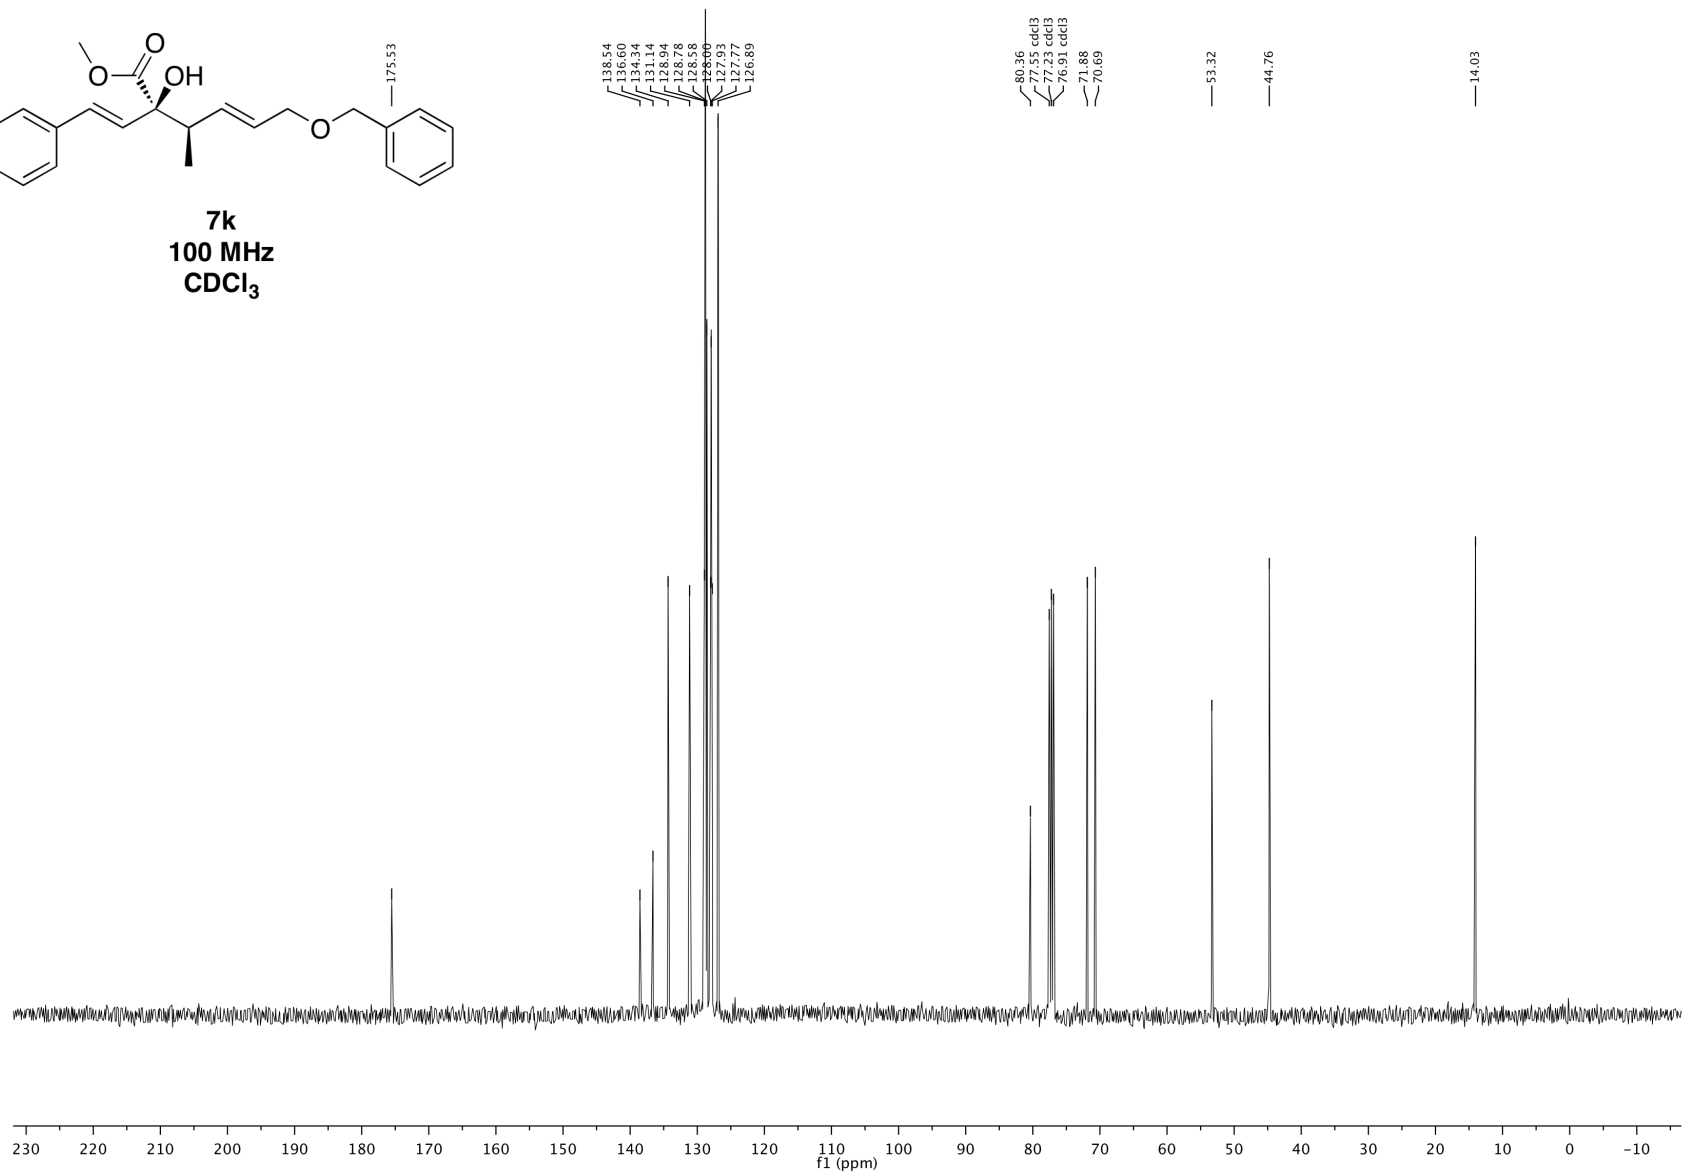

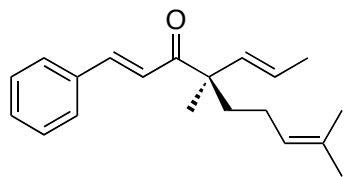

**8a**  
400 MHz  
CDCl<sub>3</sub>

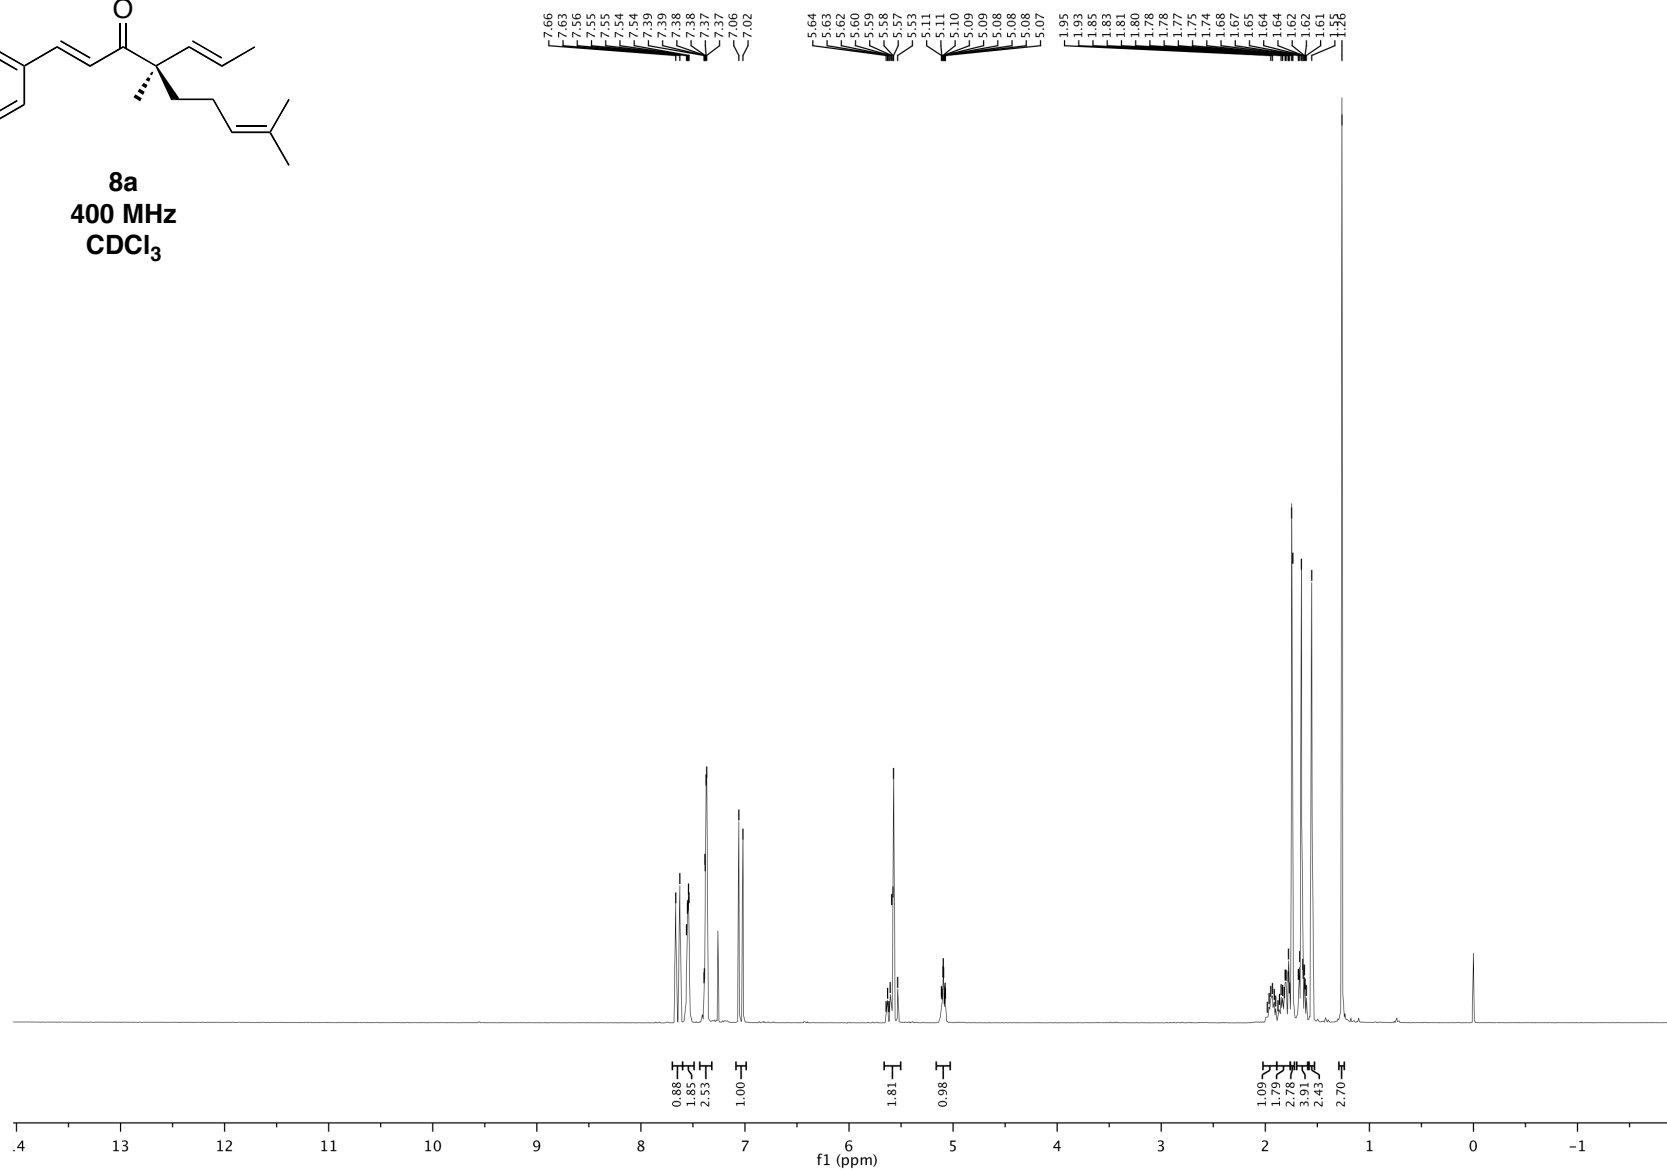

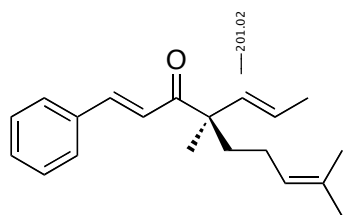

**8a**  
100 MHz  
CDCl<sub>3</sub>

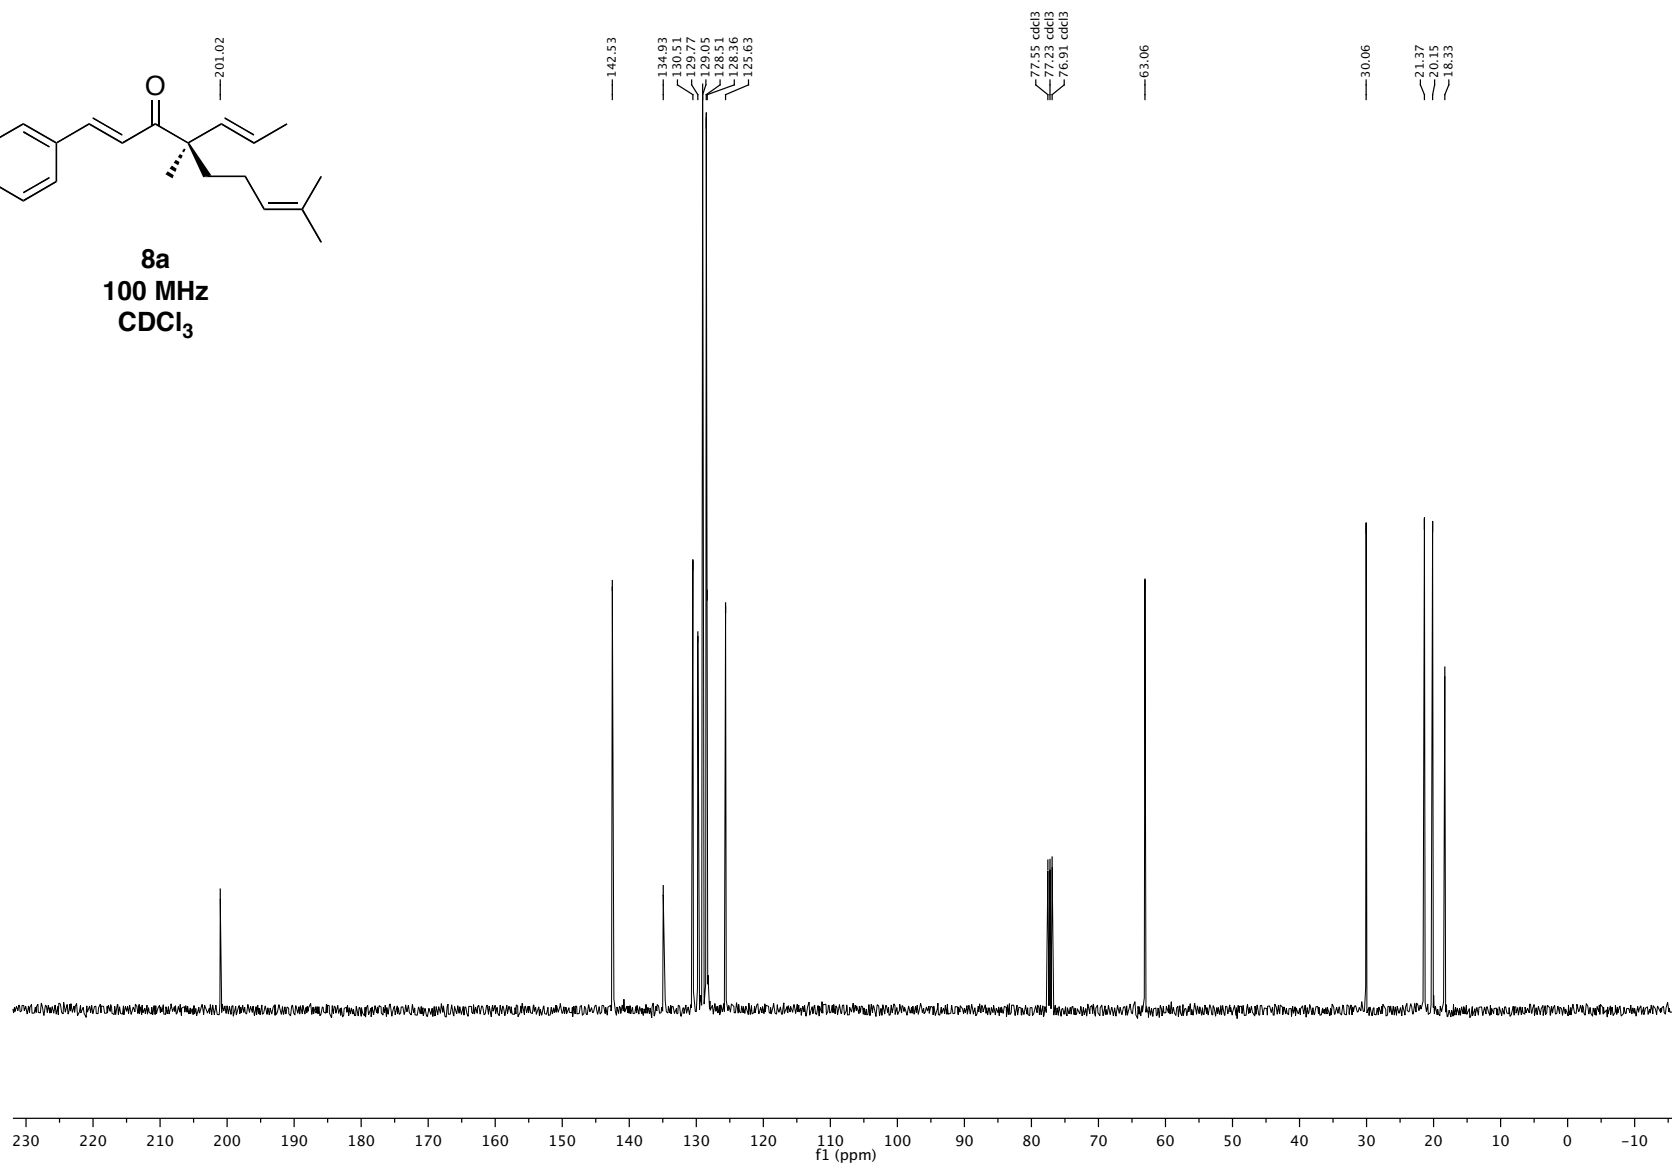

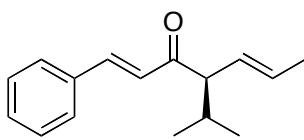

**8b**  
400 MHz  
CDCl<sub>3</sub>

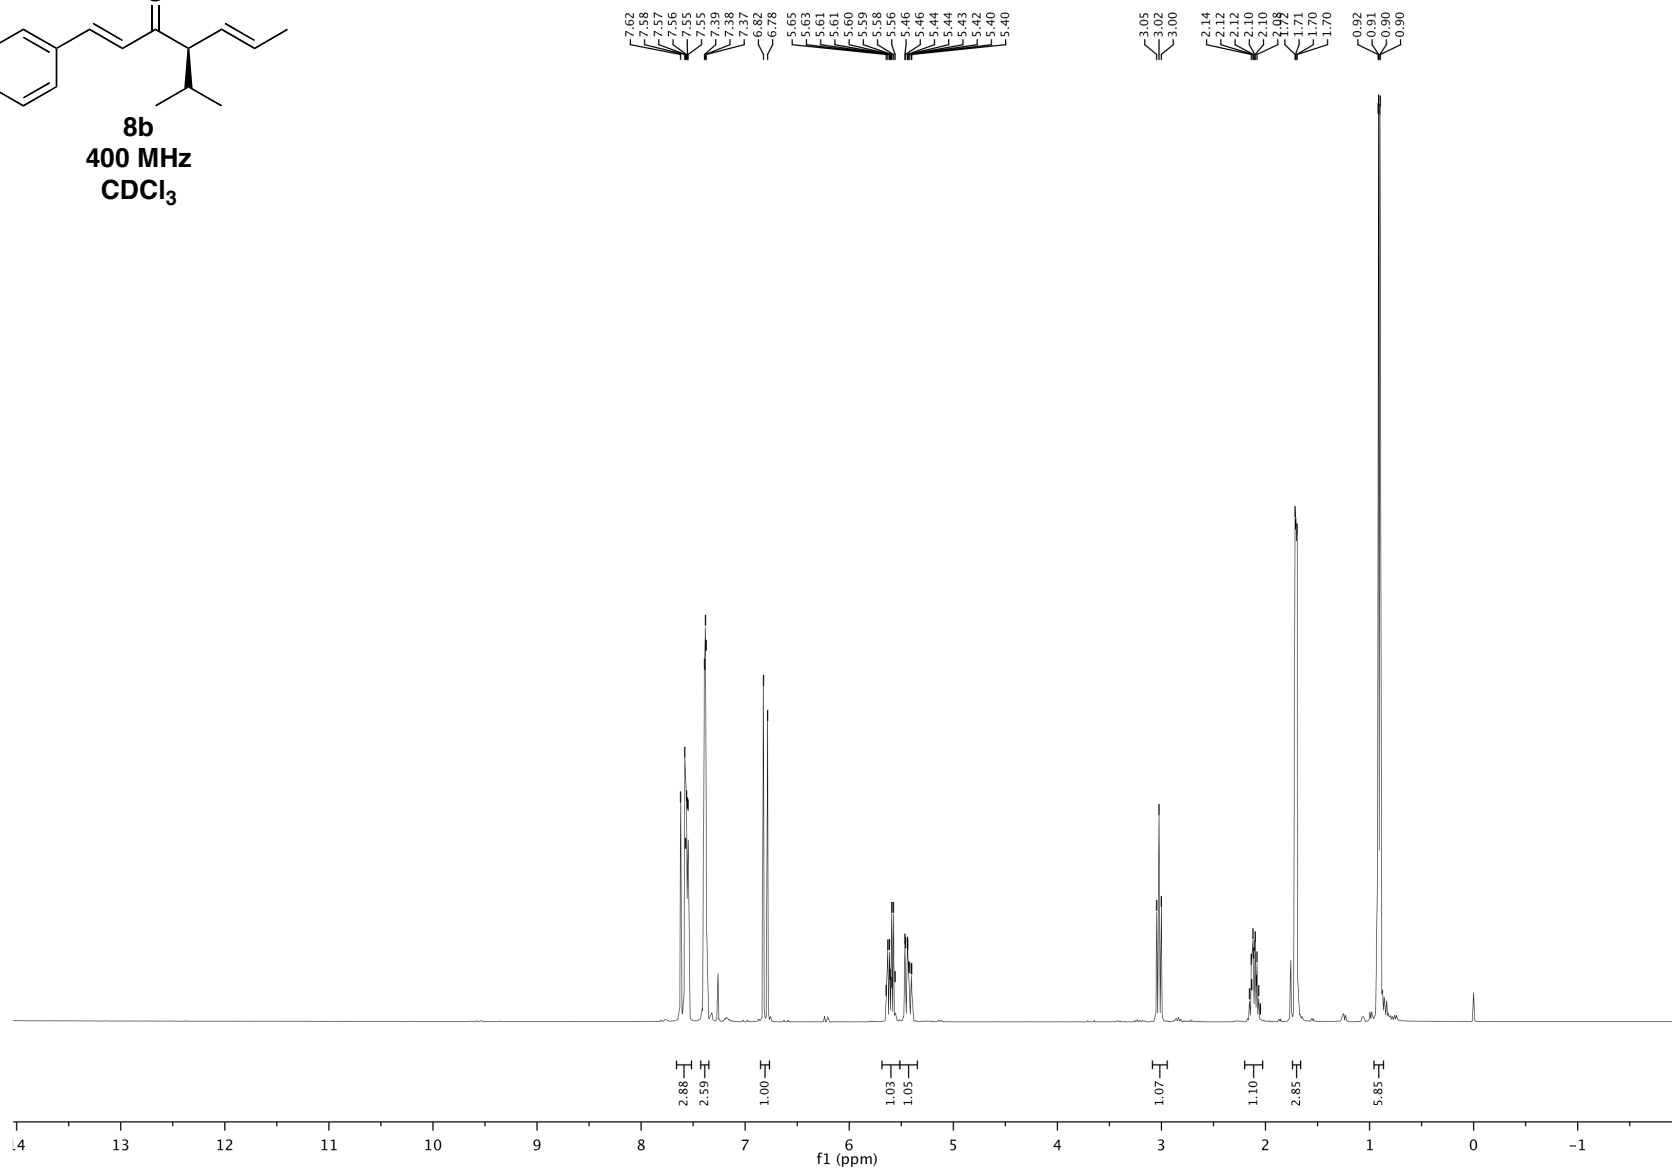

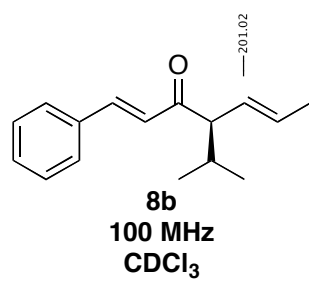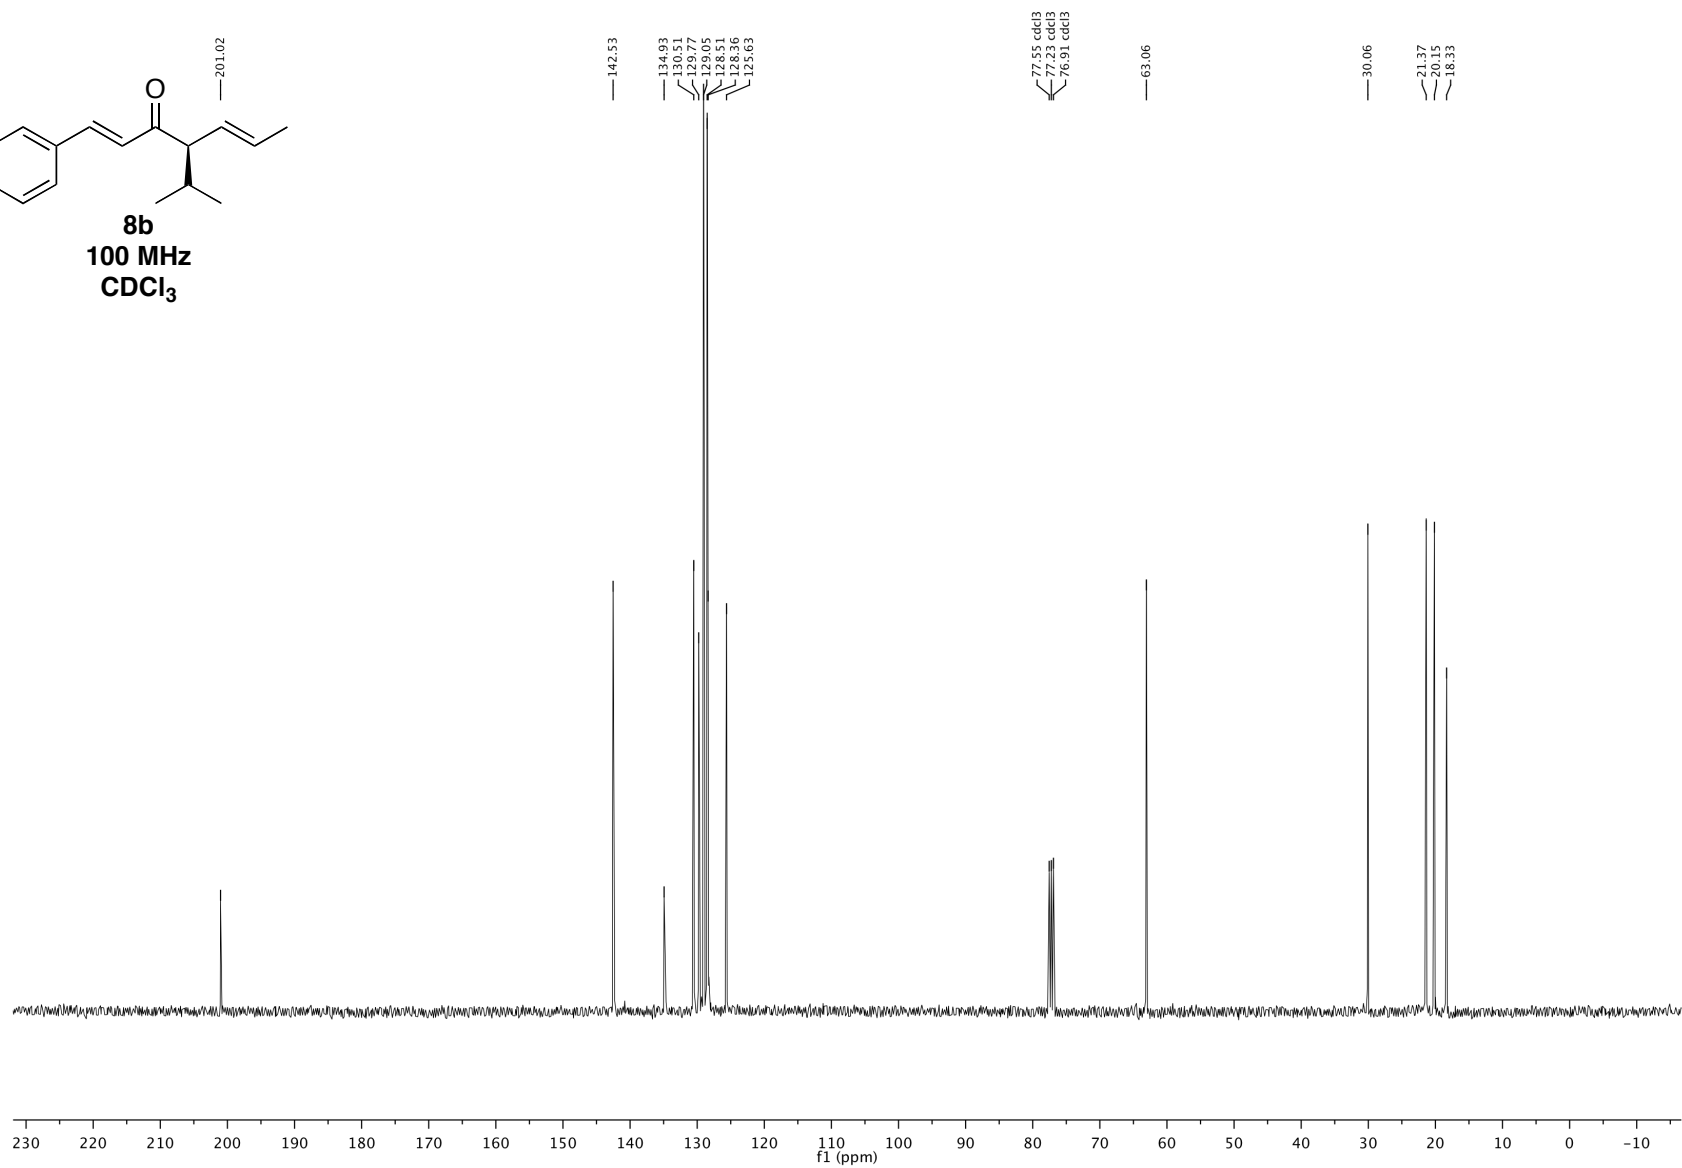



## 7. HPLC Traces for Compound 8b

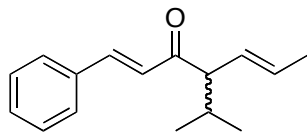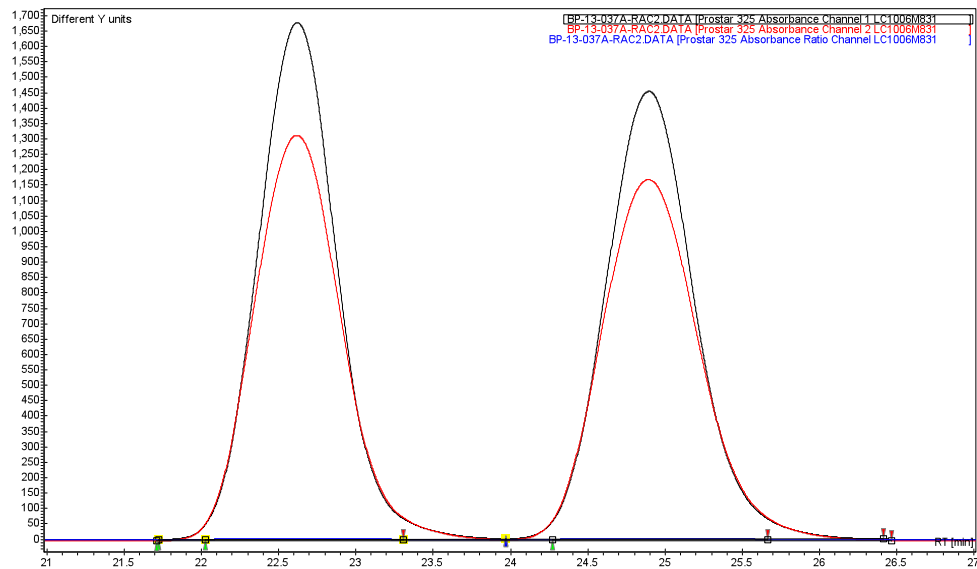

| ENTRY | TIME (MIN) | QUANTITY (%) |
|-------|------------|--------------|
| 1     | 22.62      | 50.69        |
| 2     | 24.90      | 49.31        |

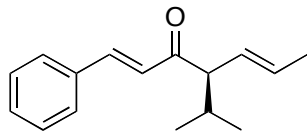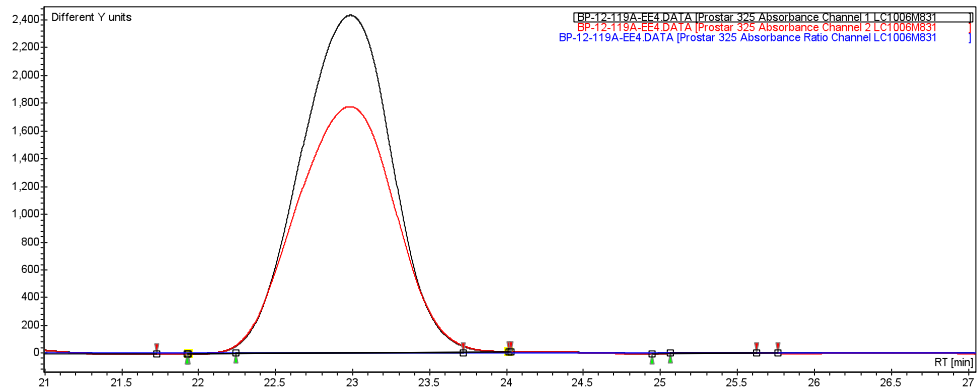

| ENTRY | TIME (MIN) | QUANTITY (%) |
|-------|------------|--------------|
| 1     | 22.99      | 99.93        |
| 2     | 25.35      | 0.07         |

## 8. X-Ray Crystallography Data

## 5c

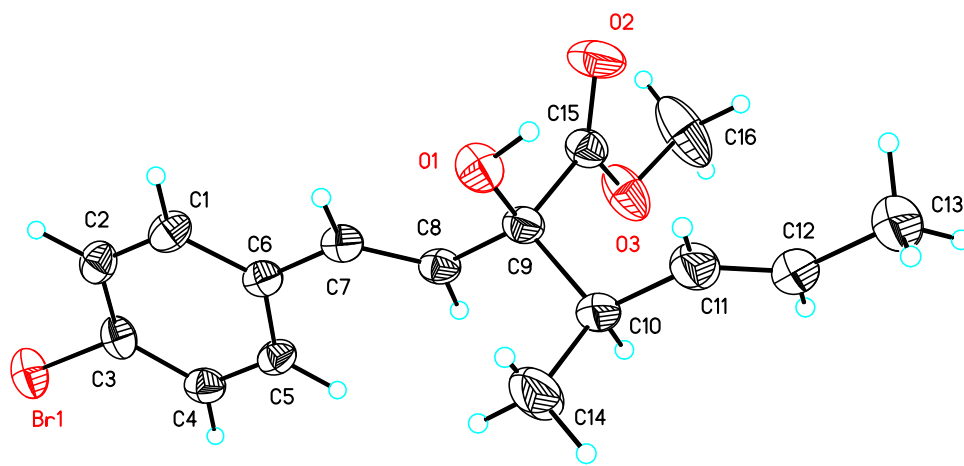Table 1. Crystal data and structure refinement for **5c**.

|                                 |                                                   |          |
|---------------------------------|---------------------------------------------------|----------|
| Identification code             | <b>5c</b>                                         |          |
| Empirical formula               | C <sub>16</sub> H <sub>19</sub> Br O <sub>3</sub> |          |
| Formula weight                  | 339.22                                            |          |
| Temperature                     | 173(2) K                                          |          |
| Wavelength                      | 1.54178 Å                                         |          |
| Crystal system                  | Orthorhombic                                      |          |
| Space group                     | P2(1)2(1)2                                        |          |
| Unit cell dimensions            | a = 7.9626(3) Å                                   | α = 90°. |
|                                 | b = 36.6534(11) Å                                 | β = 90°. |
|                                 | c = 5.6635(2) Å                                   | γ = 90°. |
| Volume                          | 1652.93(10) Å <sup>3</sup>                        |          |
| Z                               | 4                                                 |          |
| Density (calculated)            | 1.363 Mg/m <sup>3</sup>                           |          |
| Absorption coefficient          | 3.427 mm <sup>-1</sup>                            |          |
| F(000)                          | 696                                               |          |
| Crystal size                    | 0.48 x 0.12 x 0.03 mm <sup>3</sup>                |          |
| Theta range for data collection | 2.41 to 67.55°.                                   |          |
| Index ranges                    | -8 ≤ h ≤ 8, -43 ≤ k ≤ 43, -6 ≤ l ≤ 6              |          |
| Reflections collected           | 10887                                             |          |
| Independent reflections         | 2788 [R(int) = 0.0324]                            |          |

|                                   |                                             |
|-----------------------------------|---------------------------------------------|
| Completeness to theta = 67.55°    | 94.4 %                                      |
| Absorption correction             | Semi-empirical from equivalents             |
| Max. and min. transmission        | 0.9042 and 0.2900                           |
| Refinement method                 | Full-matrix least-squares on F <sup>2</sup> |
| Data / restraints / parameters    | 2788 / 0 / 181                              |
| Goodness-of-fit on F <sup>2</sup> | 1.089                                       |
| Final R indices [I>2sigma(I)]     | R1 = 0.0368, wR2 = 0.0913                   |
| R indices (all data)              | R1 = 0.0401, wR2 = 0.0926                   |
| Absolute structure parameter      | 0.02(3)                                     |
| Largest diff. peak and hole       | 0.452 and -0.340 e.Å <sup>-3</sup>          |

Table 2. Atomic coordinates ( $\times 10^4$ ) and equivalent isotropic displacement parameters ( $\text{\AA}^2 \times 10^3$ ) for **5c**.  $U(\text{eq})$  is defined as one third of the trace of the orthogonalized  $U_{ij}$  tensor.

|       | x       | y       | z         | $U(\text{eq})$ |
|-------|---------|---------|-----------|----------------|
| Br(1) | 3150(1) | 1730(1) | 4087(1)   | 52(1)          |
| C(1)  | 1866(6) | 2456(1) | 9409(6)   | 40(1)          |
| C(2)  | 2084(6) | 2139(1) | 8096(6)   | 40(1)          |
| C(3)  | 2888(5) | 2159(1) | 5959(7)   | 37(1)          |
| C(4)  | 3519(5) | 2485(1) | 5108(7)   | 38(1)          |
| C(5)  | 3278(5) | 2800(1) | 6423(6)   | 35(1)          |
| C(6)  | 2434(5) | 2791(1) | 8582(6)   | 32(1)          |
| C(7)  | 2186(5) | 3119(1) | 10048(6)  | 34(1)          |
| C(8)  | 2353(5) | 3461(1) | 9390(6)   | 33(1)          |
| C(9)  | 2057(5) | 3783(1) | 10984(7)  | 35(1)          |
| C(10) | 3501(5) | 4062(1) | 10910(10) | 48(1)          |
| C(11) | 3081(6) | 4395(1) | 12314(9)  | 52(1)          |
| C(12) | 2888(6) | 4727(1) | 11509(10) | 63(1)          |
| C(13) | 2480(8) | 5057(1) | 12972(12) | 80(2)          |
| C(14) | 5113(6) | 3886(1) | 11784(14) | 90(2)          |
| C(15) | 420(5)  | 3973(1) | 10211(6)  | 37(1)          |
| C(16) | -950(8) | 4287(2) | 7148(9)   | 84(2)          |
| O(1)  | 1834(4) | 3667(1) | 13352(4)  | 43(1)          |
| O(2)  | -765(4) | 4008(1) | 11467(6)  | 58(1)          |
| O(3)  | 513(5)  | 4094(1) | 8025(5)   | 59(1)          |

Table 3. Bond lengths [Å] and angles [°] for **5c**.

---

|              |          |
|--------------|----------|
| Br(1)-C(3)   | 1.906(3) |
| C(1)-C(2)    | 1.389(5) |
| C(1)-C(6)    | 1.392(5) |
| C(1)-H(1A)   | 0.9500   |
| C(2)-C(3)    | 1.371(6) |
| C(2)-H(2A)   | 0.9500   |
| C(3)-C(4)    | 1.383(5) |
| C(4)-C(5)    | 1.388(5) |
| C(4)-H(4A)   | 0.9500   |
| C(5)-C(6)    | 1.395(5) |
| C(5)-H(5A)   | 0.9500   |
| C(6)-C(7)    | 1.475(5) |
| C(7)-C(8)    | 1.315(5) |
| C(7)-H(7A)   | 0.9500   |
| C(8)-C(9)    | 1.504(5) |
| C(8)-H(8A)   | 0.9500   |
| C(9)-O(1)    | 1.419(4) |
| C(9)-C(10)   | 1.540(5) |
| C(9)-C(15)   | 1.541(5) |
| C(10)-C(11)  | 1.494(6) |
| C(10)-C(14)  | 1.521(6) |
| C(10)-H(10A) | 1.0000   |
| C(11)-C(12)  | 1.308(6) |
| C(11)-H(11A) | 0.9500   |
| C(12)-C(13)  | 1.501(7) |
| C(12)-H(12A) | 0.9500   |
| C(13)-H(13A) | 0.9800   |
| C(13)-H(13B) | 0.9800   |
| C(13)-H(13C) | 0.9800   |
| C(14)-H(14A) | 0.9800   |
| C(14)-H(14B) | 0.9800   |
| C(14)-H(14C) | 0.9800   |
| C(15)-O(2)   | 1.189(5) |
| C(15)-O(3)   | 1.318(4) |

|                  |          |
|------------------|----------|
| C(16)-O(3)       | 1.450(6) |
| C(16)-H(16A)     | 0.9800   |
| C(16)-H(16B)     | 0.9800   |
| C(16)-H(16C)     | 0.9800   |
| O(1)-H(1B)       | 0.8400   |
|                  |          |
| C(2)-C(1)-C(6)   | 121.2(3) |
| C(2)-C(1)-H(1A)  | 119.4    |
| C(6)-C(1)-H(1A)  | 119.4    |
| C(3)-C(2)-C(1)   | 119.1(3) |
| C(3)-C(2)-H(2A)  | 120.4    |
| C(1)-C(2)-H(2A)  | 120.4    |
| C(2)-C(3)-C(4)   | 121.5(3) |
| C(2)-C(3)-Br(1)  | 119.9(3) |
| C(4)-C(3)-Br(1)  | 118.6(3) |
| C(3)-C(4)-C(5)   | 118.8(3) |
| C(3)-C(4)-H(4A)  | 120.6    |
| C(5)-C(4)-H(4A)  | 120.6    |
| C(4)-C(5)-C(6)   | 121.1(3) |
| C(4)-C(5)-H(5A)  | 119.4    |
| C(6)-C(5)-H(5A)  | 119.4    |
| C(1)-C(6)-C(5)   | 118.2(3) |
| C(1)-C(6)-C(7)   | 119.2(3) |
| C(5)-C(6)-C(7)   | 122.6(3) |
| C(8)-C(7)-C(6)   | 127.2(3) |
| C(8)-C(7)-H(7A)  | 116.4    |
| C(6)-C(7)-H(7A)  | 116.4    |
| C(7)-C(8)-C(9)   | 124.2(3) |
| C(7)-C(8)-H(8A)  | 117.9    |
| C(9)-C(8)-H(8A)  | 117.9    |
| O(1)-C(9)-C(8)   | 110.6(3) |
| O(1)-C(9)-C(10)  | 108.6(3) |
| C(8)-C(9)-C(10)  | 112.8(3) |
| O(1)-C(9)-C(15)  | 107.4(3) |
| C(8)-C(9)-C(15)  | 108.5(3) |
| C(10)-C(9)-C(15) | 108.9(3) |

|                     |          |
|---------------------|----------|
| C(11)-C(10)-C(14)   | 111.3(4) |
| C(11)-C(10)-C(9)    | 111.2(3) |
| C(14)-C(10)-C(9)    | 109.8(3) |
| C(11)-C(10)-H(10A)  | 108.1    |
| C(14)-C(10)-H(10A)  | 108.1    |
| C(9)-C(10)-H(10A)   | 108.1    |
| C(12)-C(11)-C(10)   | 126.9(5) |
| C(12)-C(11)-H(11A)  | 116.5    |
| C(10)-C(11)-H(11A)  | 116.5    |
| C(11)-C(12)-C(13)   | 125.6(5) |
| C(11)-C(12)-H(12A)  | 117.2    |
| C(13)-C(12)-H(12A)  | 117.2    |
| C(12)-C(13)-H(13A)  | 109.5    |
| C(12)-C(13)-H(13B)  | 109.5    |
| H(13A)-C(13)-H(13B) | 109.5    |
| C(12)-C(13)-H(13C)  | 109.5    |
| H(13A)-C(13)-H(13C) | 109.5    |
| H(13B)-C(13)-H(13C) | 109.5    |
| C(10)-C(14)-H(14A)  | 109.5    |
| C(10)-C(14)-H(14B)  | 109.5    |
| H(14A)-C(14)-H(14B) | 109.5    |
| C(10)-C(14)-H(14C)  | 109.5    |
| H(14A)-C(14)-H(14C) | 109.5    |
| H(14B)-C(14)-H(14C) | 109.5    |
| O(2)-C(15)-O(3)     | 124.8(4) |
| O(2)-C(15)-C(9)     | 123.4(3) |
| O(3)-C(15)-C(9)     | 111.8(4) |
| O(3)-C(16)-H(16A)   | 109.5    |
| O(3)-C(16)-H(16B)   | 109.5    |
| H(16A)-C(16)-H(16B) | 109.5    |
| O(3)-C(16)-H(16C)   | 109.5    |
| H(16A)-C(16)-H(16C) | 109.5    |
| H(16B)-C(16)-H(16C) | 109.5    |
| C(9)-O(1)-H(1B)     | 109.5    |
| C(15)-O(3)-C(16)    | 116.2(4) |



Table 4. Anisotropic displacement parameters ( $\text{\AA}^2 \times 10^3$ ) for **5c**. The anisotropic displacement factor exponent takes the form:  $-2\pi^2 [ h^2 a^{*2} U_{11} + \dots + 2 h k a^* b^* U_{12} ]$

|       | U11    | U22   | U33    | U23    | U13    | U12   |
|-------|--------|-------|--------|--------|--------|-------|
| Br(1) | 69(1)  | 41(1) | 46(1)  | -2(1)  | -4(1)  | 13(1) |
| C(1)  | 45(2)  | 46(2) | 28(2)  | 6(2)   | 2(2)   | -5(2) |
| C(2)  | 45(3)  | 39(2) | 34(2)  | 9(2)   | -3(2)  | 0(2)  |
| C(3)  | 42(2)  | 35(2) | 33(2)  | -2(2)  | -11(2) | 6(2)  |
| C(4)  | 32(2)  | 48(2) | 33(2)  | 4(2)   | 0(2)   | 2(2)  |
| C(5)  | 33(2)  | 40(2) | 31(2)  | 6(1)   | 1(2)   | -4(2) |
| C(6)  | 27(2)  | 42(2) | 28(2)  | 6(1)   | -6(1)  | 0(1)  |
| C(7)  | 31(2)  | 43(2) | 28(2)  | 3(1)   | -2(2)  | 0(2)  |
| C(8)  | 30(2)  | 43(2) | 27(2)  | 4(2)   | 2(1)   | 3(1)  |
| C(9)  | 30(2)  | 40(2) | 35(2)  | 4(2)   | 2(2)   | 4(1)  |
| C(10) | 30(3)  | 41(2) | 72(3)  | -4(2)  | 7(2)   | -2(2) |
| C(11) | 40(3)  | 49(2) | 68(3)  | -12(2) | 0(3)   | -1(2) |
| C(12) | 53(3)  | 46(2) | 90(4)  | -4(2)  | 24(3)  | -6(2) |
| C(13) | 65(4)  | 52(3) | 123(5) | -21(3) | 20(3)  | -2(2) |
| C(14) | 34(3)  | 55(3) | 183(8) | -25(4) | -6(4)  | 5(2)  |
| C(15) | 37(3)  | 42(2) | 33(2)  | 0(2)   | 3(2)   | 5(2)  |
| C(16) | 114(5) | 85(4) | 53(3)  | -10(3) | -28(3) | 61(4) |
| O(1)  | 54(2)  | 48(1) | 28(1)  | -1(1)  | 1(1)   | 8(1)  |
| O(2)  | 33(2)  | 79(2) | 60(2)  | 7(2)   | 10(2)  | 12(2) |
| O(3)  | 82(3)  | 60(2) | 36(2)  | 3(1)   | 0(2)   | 34(2) |

Table 5. Hydrogen coordinates ( $\times 10^4$ ) and isotropic displacement parameters ( $\text{\AA}^2 \times 10^{-3}$ ) for **5c**.

|        | x     | y    | z     | U(eq) |
|--------|-------|------|-------|-------|
| H(1A)  | 1320  | 2443 | 10898 | 48    |
| H(2A)  | 1681  | 1912 | 8671  | 48    |
| H(4A)  | 4106  | 2493 | 3649  | 45    |
| H(5A)  | 3695  | 3026 | 5843  | 42    |
| H(7A)  | 1871  | 3079 | 11645 | 41    |
| H(8A)  | 2682  | 3508 | 7806  | 40    |
| H(10A) | 3674  | 4138 | 9230  | 57    |
| H(11A) | 2939  | 4362 | 13965 | 63    |
| H(12A) | 3017  | 4762 | 9857  | 76    |
| H(13A) | 2410  | 5272 | 11949 | 120   |
| H(13B) | 3364  | 5094 | 14153 | 120   |
| H(13C) | 1402  | 5020 | 13770 | 120   |
| H(14A) | 6031  | 4064 | 11718 | 136   |
| H(14B) | 5387  | 3676 | 10781 | 136   |
| H(14C) | 4960  | 3803 | 13416 | 136   |
| H(16A) | -749  | 4364 | 5516  | 126   |
| H(16B) | -1162 | 4501 | 8135  | 126   |
| H(16C) | -1928 | 4125 | 7199  | 126   |
| H(1B)  | 1469  | 3841 | 14166 | 65    |

Table 6. Torsion angles [°] for **5c**.

---

|                         |           |
|-------------------------|-----------|
| C(6)-C(1)-C(2)-C(3)     | 0.6(6)    |
| C(1)-C(2)-C(3)-C(4)     | 1.5(6)    |
| C(1)-C(2)-C(3)-Br(1)    | -178.4(3) |
| C(2)-C(3)-C(4)-C(5)     | -2.2(6)   |
| Br(1)-C(3)-C(4)-C(5)    | 177.7(3)  |
| C(3)-C(4)-C(5)-C(6)     | 0.8(6)    |
| C(2)-C(1)-C(6)-C(5)     | -1.9(6)   |
| C(2)-C(1)-C(6)-C(7)     | -179.5(4) |
| C(4)-C(5)-C(6)-C(1)     | 1.2(6)    |
| C(4)-C(5)-C(6)-C(7)     | 178.7(3)  |
| C(1)-C(6)-C(7)-C(8)     | -166.5(4) |
| C(5)-C(6)-C(7)-C(8)     | 16.0(6)   |
| C(6)-C(7)-C(8)-C(9)     | 179.2(3)  |
| C(7)-C(8)-C(9)-O(1)     | 9.0(5)    |
| C(7)-C(8)-C(9)-C(10)    | 130.9(4)  |
| C(7)-C(8)-C(9)-C(15)    | -108.4(4) |
| O(1)-C(9)-C(10)-C(11)   | -63.0(4)  |
| C(8)-C(9)-C(10)-C(11)   | 174.0(4)  |
| C(15)-C(9)-C(10)-C(11)  | 53.5(5)   |
| O(1)-C(9)-C(10)-C(14)   | 60.6(5)   |
| C(8)-C(9)-C(10)-C(14)   | -62.4(5)  |
| C(15)-C(9)-C(10)-C(14)  | 177.2(4)  |
| C(14)-C(10)-C(11)-C(12) | 121.6(6)  |
| C(9)-C(10)-C(11)-C(12)  | -115.7(5) |
| C(10)-C(11)-C(12)-C(13) | -179.4(5) |
| O(1)-C(9)-C(15)-O(2)    | 0.2(5)    |
| C(8)-C(9)-C(15)-O(2)    | 119.7(4)  |
| C(10)-C(9)-C(15)-O(2)   | -117.2(4) |
| O(1)-C(9)-C(15)-O(3)    | 179.5(3)  |
| C(8)-C(9)-C(15)-O(3)    | -61.1(4)  |
| C(10)-C(9)-C(15)-O(3)   | 62.1(4)   |
| O(2)-C(15)-O(3)-C(16)   | 0.8(7)    |
| C(9)-C(15)-O(3)-C(16)   | -178.4(4) |

---

Table 7. Hydrogen bonds for **5c** [ $\text{\AA}$  and  $^\circ$ ].

| D-H...A             | d(D-H) | d(H...A) | d(D...A) | $\angle(\text{DHA})$ |
|---------------------|--------|----------|----------|----------------------|
| O(1)-H(1B)...O(3)#1 | 0.84   | 2.49     | 3.250(4) | 150.5                |

Symmetry transformations used to generate equivalent atoms:

#1  $x, y, z+1$

7b

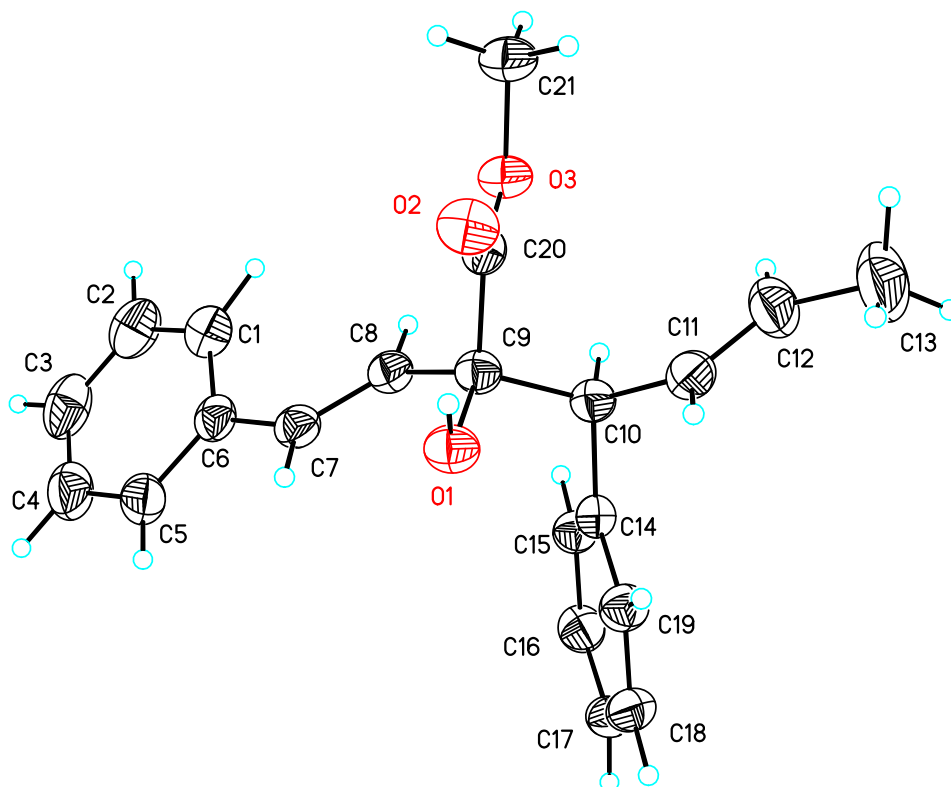

Table 1. Crystal data and structure refinement for **7b**.

|                      |                                                |                              |
|----------------------|------------------------------------------------|------------------------------|
| Identification code  | <b>7b</b>                                      |                              |
| Empirical formula    | C <sub>21</sub> H <sub>22</sub> O <sub>3</sub> |                              |
| Formula weight       | 322.39                                         |                              |
| Temperature          | 173(2) K                                       |                              |
| Wavelength           | 1.54178 Å                                      |                              |
| Crystal system       | Monoclinic                                     |                              |
| Space group          | P2(1)                                          |                              |
| Unit cell dimensions | a = 11.1117(5) Å                               | $\alpha = 90^\circ$ .        |
|                      | b = 5.5288(3) Å                                | $\beta = 104.084(2)^\circ$ . |
|                      | c = 14.6321(7) Å                               | $\gamma = 90^\circ$ .        |
| Volume               | 871.89(7) Å <sup>3</sup>                       |                              |
| Z                    | 2                                              |                              |
| Density (calculated) | 1.228 Mg/m <sup>3</sup>                        |                              |

|                                   |                                             |
|-----------------------------------|---------------------------------------------|
| Absorption coefficient            | 0.646 mm <sup>-1</sup>                      |
| F(000)                            | 344                                         |
| Crystal size                      | 0.42 x 0.17 x 0.16 mm <sup>3</sup>          |
| Theta range for data collection   | 3.11 to 68.04°.                             |
| Index ranges                      | -12<=h<=13, -6<=k<=5, -16<=l<=17            |
| Reflections collected             | 6114                                        |
| Independent reflections           | 2555 [R(int) = 0.0138]                      |
| Completeness to theta = 68.04°    | 95.9 %                                      |
| Absorption correction             | Semi-empirical from equivalents             |
| Max. and min. transmission        | 0.9038 and 0.7732                           |
| Refinement method                 | Full-matrix least-squares on F <sup>2</sup> |
| Data / restraints / parameters    | 2555 / 1 / 305                              |
| Goodness-of-fit on F <sup>2</sup> | 1.013                                       |
| Final R indices [I>2sigma(I)]     | R1 = 0.0254, wR2 = 0.0692                   |
| R indices (all data)              | R1 = 0.0258, wR2 = 0.0697                   |
| Absolute structure parameter      | -0.20(16)                                   |
| Largest diff. peak and hole       | 0.143 and -0.133 e.Å <sup>-3</sup>          |

Table 2. Atomic coordinates ( $\times 10^4$ ) and equivalent isotropic displacement parameters ( $\text{\AA}^2 \times 10^3$ ) for **7b**.  $U(\text{eq})$  is defined as one third of the trace of the orthogonalized  $U_{ij}$  tensor.

|       | x       | y       | z       | $U(\text{eq})$ |
|-------|---------|---------|---------|----------------|
| C(1)  | 7838(1) | 8078(3) | 2616(1) | 44(1)          |
| C(2)  | 9030(2) | 9020(4) | 2923(1) | 54(1)          |
| C(3)  | 9910(2) | 7803(4) | 3599(1) | 56(1)          |
| C(4)  | 9602(1) | 5691(4) | 3974(1) | 54(1)          |
| C(5)  | 8419(1) | 4749(4) | 3671(1) | 43(1)          |
| C(6)  | 7514(1) | 5921(3) | 2990(1) | 33(1)          |
| C(7)  | 6265(1) | 4860(3) | 2673(1) | 33(1)          |
| C(8)  | 5242(1) | 6061(3) | 2264(1) | 31(1)          |
| C(9)  | 3985(1) | 4929(3) | 1864(1) | 31(1)          |
| C(10) | 2952(1) | 6164(3) | 2259(1) | 31(1)          |
| C(11) | 1674(1) | 5447(3) | 1697(1) | 39(1)          |
| C(12) | 817(2)  | 6987(4) | 1279(1) | 53(1)          |
| C(13) | -479(2) | 6317(7) | 57(2)   | 79(1)          |
| C(14) | 3127(1) | 5696(3) | 3307(1) | 30(1)          |
| C(15) | 3716(1) | 7413(3) | 3955(1) | 34(1)          |
| C(16) | 3844(1) | 7080(3) | 4914(1) | 39(1)          |
| C(17) | 3377(1) | 5013(3) | 5233(1) | 39(1)          |
| C(18) | 2799(1) | 3283(3) | 4598(1) | 40(1)          |
| C(19) | 2679(1) | 3610(3) | 3639(1) | 36(1)          |
| C(20) | 3670(1) | 5295(3) | 790(1)  | 30(1)          |
| C(21) | 3394(2) | 8006(3) | -470(1) | 40(1)          |
| O(1)  | 4001(1) | 2406(2) | 2035(1) | 36(1)          |
| O(2)  | 3484(1) | 3623(2) | 245(1)  | 41(1)          |
| O(3)  | 3649(1) | 7599(2) | 539(1)  | 35(1)          |

Table 3. Bond lengths [Å] and angles [°] for **7b**.

---

|              |            |
|--------------|------------|
| C(1)-C(2)    | 1.392(2)   |
| C(1)-C(6)    | 1.395(2)   |
| C(1)-H(1)    | 1.031(19)  |
| C(2)-C(3)    | 1.384(3)   |
| C(2)-H(2)    | 0.97(3)    |
| C(3)-C(4)    | 1.368(3)   |
| C(3)-H(3)    | 0.93(2)    |
| C(4)-C(5)    | 1.383(2)   |
| C(4)-H(4)    | 0.99(2)    |
| C(5)-C(6)    | 1.392(2)   |
| C(5)-H(5)    | 0.94(2)    |
| C(6)-C(7)    | 1.4737(19) |
| C(7)-C(8)    | 1.327(2)   |
| C(7)-H(7)    | 0.96(2)    |
| C(8)-C(9)    | 1.5122(18) |
| C(8)-H(8)    | 0.989(19)  |
| C(9)-O(1)    | 1.4166(18) |
| C(9)-C(20)   | 1.5388(17) |
| C(9)-C(10)   | 1.5624(19) |
| C(10)-C(11)  | 1.5100(18) |
| C(10)-C(14)  | 1.5198(17) |
| C(10)-H(10)  | 0.979(18)  |
| C(11)-C(12)  | 1.313(2)   |
| C(11)-H(11)  | 0.95(2)    |
| C(12)-C(13)  | 1.503(3)   |
| C(12)-H(12)  | 1.04(3)    |
| C(13)-H(13A) | 0.98(3)    |
| C(13)-H(13B) | 1.00(3)    |
| C(13)-H(13C) | 1.00(4)    |
| C(14)-C(15)  | 1.388(2)   |
| C(14)-C(19)  | 1.390(2)   |
| C(15)-C(16)  | 1.387(2)   |
| C(15)-H(15)  | 0.942(17)  |
| C(16)-C(17)  | 1.383(2)   |



|              |            |
|--------------|------------|
| C(16)-H(16)  | 0.948(19)  |
| C(17)-C(18)  | 1.379(2)   |
| C(17)-H(17)  | 0.949(18)  |
| C(18)-C(19)  | 1.388(2)   |
| C(18)-H(18)  | 0.95(2)    |
| C(19)-H(19)  | 0.964(18)  |
| C(20)-O(2)   | 1.2049(17) |
| C(20)-O(3)   | 1.3240(18) |
| C(21)-O(3)   | 1.4510(16) |
| C(21)-H(21A) | 0.96(2)    |
| C(21)-H(21B) | 0.966(17)  |
| C(21)-H(21C) | 0.94(2)    |
| O(1)-H(1O)   | 0.882(19)  |

|                |            |
|----------------|------------|
| C(2)-C(1)-C(6) | 57(16)     |
| C(2)-C(1)-H(1) | 118.5(11)  |
| C(6)-C(1)-H(1) | 120.8(11)  |
| C(3)-C(2)-C(1) | 120.01(19) |
| C(3)-C(2)-H(2) | 122.3(12)  |
| C(1)-C(2)-H(2) | 117.6(12)  |
| C(4)-C(3)-C(2) | 119.94(16) |
| C(4)-C(3)-H(3) | 117.6(13)  |
| C(2)-C(3)-H(3) | 122.3(13)  |
| C(3)-C(4)-C(5) | 120.25(17) |
| C(3)-C(4)-H(4) | 120.3(13)  |
| C(5)-C(4)-H(4) | 119.5(13)  |
| C(4)-C(5)-C(6) | 121.27(18) |
| C(4)-C(5)-H(5) | 119.9(11)  |
| C(6)-C(5)-H(5) | 118.7(11)  |
| C(5)-C(6)-C(1) | 117.94(14) |
| C(5)-C(6)-C(7) | 120.07(14) |
| C(1)-C(6)-C(7) | 121.97(13) |
| C(8)-C(7)-C(6) | 125.48(14) |
| C(8)-C(7)-H(7) | 116.8(10)  |
| C(6)-C(7)-H(7) | 117.7(10)  |
| C(7)-C(8)-C(9) | 125.22(14) |

|                     |            |
|---------------------|------------|
| C(7)-C(8)-H(8)      | 121.4(9)   |
| C(9)-C(8)-H(8)      | 113.3(9)   |
| O(1)-C(9)-C(8)      | 111.60(11) |
| O(1)-C(9)-C(20)     | 107.45(11) |
| C(8)-C(9)-C(20)     | 107.41(10) |
| O(1)-C(9)-C(10)     | 110.14(11) |
| C(8)-C(9)-C(10)     | 111.64(11) |
| C(20)-C(9)-C(10)    | 108.42(10) |
| C(11)-C(10)-C(14)   | 112.18(11) |
| C(11)-C(10)-C(9)    | 111.19(12) |
| C(14)-C(10)-C(9)    | 111.91(10) |
| C(11)-C(10)-H(10)   | 107.3(8)   |
| C(14)-C(10)-H(10)   | 107.9(8)   |
| C(9)-C(10)-H(10)    | 106.0(9)   |
| C(12)-C(11)-C(10)   | 124.24(18) |
| C(12)-C(11)-H(11)   | 119.5(11)  |
| C(10)-C(11)-H(11)   | 116.2(11)  |
| C(11)-C(12)-C(13)   | 125.0(2)   |
| C(11)-C(12)-H(12)   | 117.8(13)  |
| C(13)-C(12)-H(12)   | 117.2(13)  |
| C(12)-C(13)-H(13A)  | 107.7(17)  |
| C(12)-C(13)-H(13B)  | 109.3(14)  |
| H(13A)-C(13)-H(13B) | 109(2)     |
| C(12)-C(13)-H(13C)  | 107.6(18)  |
| H(13A)-C(13)-H(13C) | 108(3)     |
| H(13B)-C(13)-H(13C) | 115(3)     |
| C(15)-C(14)-C(19)   | 118.54(12) |
| C(15)-C(14)-C(10)   | 119.76(12) |
| C(19)-C(14)-C(10)   | 121.67(12) |
| C(16)-C(15)-C(14)   | 121.04(14) |
| C(16)-C(15)-H(15)   | 119.7(9)   |
| C(14)-C(15)-H(15)   | 119.2(9)   |
| C(17)-C(16)-C(15)   | 119.82(14) |
| C(17)-C(16)-H(16)   | 119.5(10)  |
| C(15)-C(16)-H(16)   | 120.7(10)  |
| C(18)-C(17)-C(16)   | 119.78(13) |

|                     |            |
|---------------------|------------|
| C(18)-C(17)-H(17)   | 120.9(12)  |
| C(16)-C(17)-H(17)   | 119.2(12)  |
| C(17)-C(18)-C(19)   | 120.37(15) |
| C(17)-C(18)-H(18)   | 120.2(11)  |
| C(19)-C(18)-H(18)   | 119.4(11)  |
| C(18)-C(19)-C(14)   | 120.44(14) |
| C(18)-C(19)-H(19)   | 121.0(10)  |
| C(14)-C(19)-H(19)   | 118.6(10)  |
| O(2)-C(20)-O(3)     | 124.49(12) |
| O(2)-C(20)-C(9)     | 122.31(13) |
| O(3)-C(20)-C(9)     | 113.19(11) |
| O(3)-C(21)-H(21A)   | 104.5(11)  |
| O(3)-C(21)-H(21B)   | 109.5(10)  |
| H(21A)-C(21)-H(21B) | 112.5(16)  |
| O(3)-C(21)-H(21C)   | 110.5(11)  |
| H(21A)-C(21)-H(21C) | 109.6(18)  |
| H(21B)-C(21)-H(21C) | 110.1(15)  |
| C(9)-O(1)-H(10)     | 103.7(12)  |
| C(20)-O(3)-C(21)    | 114.63(12) |

---

Table 4. Anisotropic displacement parameters ( $\text{\AA}^2 \times 10^3$ ) for **7b**. The anisotropic displacement factor exponent takes the form:  $-2\pi^2 [ h^2 a^{*2} U_{11} + \dots + 2 h k a^* b^* U_{12} ]$

|       | U11   | U22    | U33   | U23    | U13   | U12    |
|-------|-------|--------|-------|--------|-------|--------|
| C(1)  | 41(1) | 47(1)  | 47(1) | -1(1)  | 15(1) | 0(1)   |
| C(2)  | 48(1) | 54(1)  | 65(1) | -10(1) | 24(1) | -12(1) |
| C(3)  | 36(1) | 79(1)  | 56(1) | -23(1) | 14(1) | -11(1) |
| C(4)  | 35(1) | 78(1)  | 46(1) | -4(1)  | 7(1)  | 7(1)   |
| C(5)  | 38(1) | 53(1)  | 40(1) | 0(1)   | 11(1) | 7(1)   |
| C(6)  | 33(1) | 40(1)  | 30(1) | -6(1)  | 11(1) | 3(1)   |
| C(7)  | 37(1) | 34(1)  | 30(1) | 0(1)   | 12(1) | 1(1)   |
| C(8)  | 34(1) | 31(1)  | 29(1) | -1(1)  | 10(1) | 0(1)   |
| C(9)  | 33(1) | 28(1)  | 31(1) | 2(1)   | 8(1)  | 0(1)   |
| C(10) | 32(1) | 31(1)  | 31(1) | 3(1)   | 8(1)  | 0(1)   |
| C(11) | 35(1) | 49(1)  | 35(1) | 2(1)   | 10(1) | -4(1)  |
| C(12) | 38(1) | 75(1)  | 41(1) | -3(1)  | 2(1)  | 11(1)  |
| C(13) | 37(1) | 134(3) | 58(1) | -13(2) | -1(1) | 13(1)  |
| C(14) | 27(1) | 33(1)  | 32(1) | 3(1)   | 9(1)  | 3(1)   |
| C(15) | 35(1) | 32(1)  | 35(1) | 3(1)   | 10(1) | 0(1)   |
| C(16) | 40(1) | 42(1)  | 34(1) | -3(1)  | 8(1)  | 4(1)   |
| C(17) | 42(1) | 46(1)  | 31(1) | 8(1)   | 14(1) | 10(1)  |
| C(18) | 43(1) | 39(1)  | 43(1) | 11(1)  | 19(1) | 4(1)   |
| C(19) | 38(1) | 34(1)  | 38(1) | 2(1)   | 11(1) | -2(1)  |
| C(20) | 28(1) | 31(1)  | 31(1) | -2(1)  | 8(1)  | -1(1)  |
| C(21) | 52(1) | 41(1)  | 28(1) | 0(1)   | 10(1) | 0(1)   |
| O(1)  | 44(1) | 28(1)  | 36(1) | 1(1)   | 10(1) | -1(1)  |
| O(2)  | 50(1) | 36(1)  | 37(1) | -6(1)  | 7(1)  | -3(1)  |
| O(3)  | 45(1) | 32(1)  | 27(1) | 1(1)   | 9(1)  | -1(1)  |

Table 5. Hydrogen coordinates ( $\times 10^4$ ) and isotropic displacement parameters ( $\text{\AA}^2 \times 10^{-3}$ ) for **7b**.

|        | x         | y         | z        | U(eq)   |
|--------|-----------|-----------|----------|---------|
| H(1)   | 7223(17)  | 8940(40)  | 2071(13) | 54(5)   |
| H(2)   | 9218(19)  | 10500(50) | 2631(14) | 64(6)   |
| H(3)   | 10726(19) | 8320(40)  | 3791(13) | 62(5)   |
| H(4)   | 10229(19) | 4810(40)  | 4457(14) | 65(6)   |
| H(5)   | 8227(17)  | 3240(40)  | 3901(13) | 53(5)   |
| H(7)   | 6178(15)  | 3150(40)  | 2770(11) | 40(4)   |
| H(8)   | 5251(13)  | 7830(30)  | 2167(10) | 35(4)   |
| H(10)  | 3039(13)  | 7910(30)  | 2171(10) | 28(4)   |
| H(11)  | 1492(16)  | 3760(40)  | 1672(12) | 46(5)   |
| H(12)  | 1050(20)  | 8810(50)  | 1302(16) | 77(7)   |
| H(13A) | -620(30)  | 6980(60)  | 120(20)  | 111(10) |
| H(13B) | -1080(20) | 7070(50)  | 1078(18) | 99(9)   |
| H(13C) | -520(30)  | 4510(70)  | 700(20)  | 103(10) |
| H(15)  | 3987(14)  | 8870(30)  | 3736(11) | 31(4)   |
| H(16)  | 4249(15)  | 8260(40)  | 5353(12) | 43(4)   |
| H(17)  | 3508(16)  | 4760(30)  | 5892(13) | 48(5)   |
| H(18)  | 2514(16)  | 1830(40)  | 4815(12) | 45(5)   |
| H(19)  | 2267(15)  | 2420(40)  | 3189(11) | 39(4)   |
| H(21A) | 3422(17)  | 9740(40)  | -534(13) | 54(5)   |
| H(21B) | 2591(16)  | 7340(40)  | -770(11) | 43(4)   |
| H(21C) | 4009(16)  | 7290(40)  | -719(12) | 48(5)   |
| H(10)  | 3795(16)  | 1770(30)  | 1466(13) | 48(5)   |

Table 6. Torsion angles [ $^{\circ}$ ] for **7b**.

---

|                         |             |
|-------------------------|-------------|
| C(6)-C(1)-C(2)-C(3)     | 0.7(2)      |
| C(1)-C(2)-C(3)-C(4)     | -0.9(3)     |
| C(2)-C(3)-C(4)-C(5)     | 0.9(3)      |
| C(3)-C(4)-C(5)-C(6)     | -0.6(3)     |
| C(4)-C(5)-C(6)-C(1)     | 0.4(2)      |
| C(4)-C(5)-C(6)-C(7)     | 179.27(14)  |
| C(2)-C(1)-C(6)-C(5)     | -0.5(2)     |
| C(2)-C(1)-C(6)-C(7)     | -179.30(14) |
| C(5)-C(6)-C(7)-C(8)     | 158.53(14)  |
| C(1)-C(6)-C(7)-C(8)     | -22.7(2)    |
| C(6)-C(7)-C(8)-C(9)     | 174.43(12)  |
| C(7)-C(8)-C(9)-O(1)     | 4.06(19)    |
| C(7)-C(8)-C(9)-C(20)    | -113.46(14) |
| C(7)-C(8)-C(9)-C(10)    | 127.81(14)  |
| O(1)-C(9)-C(10)-C(11)   | -68.77(14)  |
| C(8)-C(9)-C(10)-C(11)   | 166.66(12)  |
| C(20)-C(9)-C(10)-C(11)  | 48.54(15)   |
| O(1)-C(9)-C(10)-C(14)   | 57.56(14)   |
| C(8)-C(9)-C(10)-C(14)   | -67.01(14)  |
| C(20)-C(9)-C(10)-C(14)  | 174.87(11)  |
| C(14)-C(10)-C(11)-C(12) | 110.54(17)  |
| C(9)-C(10)-C(11)-C(12)  | -123.28(16) |
| C(10)-C(11)-C(12)-C(13) | -176.81(16) |
| C(11)-C(10)-C(14)-C(15) | -137.08(14) |
| C(9)-C(10)-C(14)-C(15)  | 97.13(14)   |
| C(11)-C(10)-C(14)-C(19) | 40.96(18)   |
| C(9)-C(10)-C(14)-C(19)  | -84.83(15)  |
| C(19)-C(14)-C(15)-C(16) | -0.78(19)   |
| C(10)-C(14)-C(15)-C(16) | 177.33(12)  |
| C(14)-C(15)-C(16)-C(17) | -0.2(2)     |
| C(15)-C(16)-C(17)-C(18) | 0.7(2)      |
| C(16)-C(17)-C(18)-C(19) | -0.3(2)     |
| C(17)-C(18)-C(19)-C(14) | -0.7(2)     |
| C(15)-C(14)-C(19)-C(18) | 1.22(19)    |

|                         |             |
|-------------------------|-------------|
| C(10)-C(14)-C(19)-C(18) | -176.84(12) |
| O(1)-C(9)-C(20)-O(2)    | 0.15(16)    |
| C(8)-C(9)-C(20)-O(2)    | 120.35(14)  |
| C(10)-C(9)-C(20)-O(2)   | -118.87(14) |
| O(1)-C(9)-C(20)-O(3)    | -178.85(11) |
| C(8)-C(9)-C(20)-O(3)    | -58.65(14)  |
| C(10)-C(9)-C(20)-O(3)   | 62.13(13)   |
| O(2)-C(20)-O(3)-C(21)   | -0.83(18)   |
| C(9)-C(20)-O(3)-C(21)   | 178.15(11)  |

---

Table 7. Hydrogen bonds for **7b** [ $\text{\AA}$  and  $^\circ$ ].

| D-H...A           | d(D-H)    | d(H...A)  | d(D...A)   | $\angle(\text{DHA})$ |
|-------------------|-----------|-----------|------------|----------------------|
| O(1)-H(1O)...O(2) | 0.882(19) | 2.014(19) | 2.6288(14) | 125.7(16)            |



7h

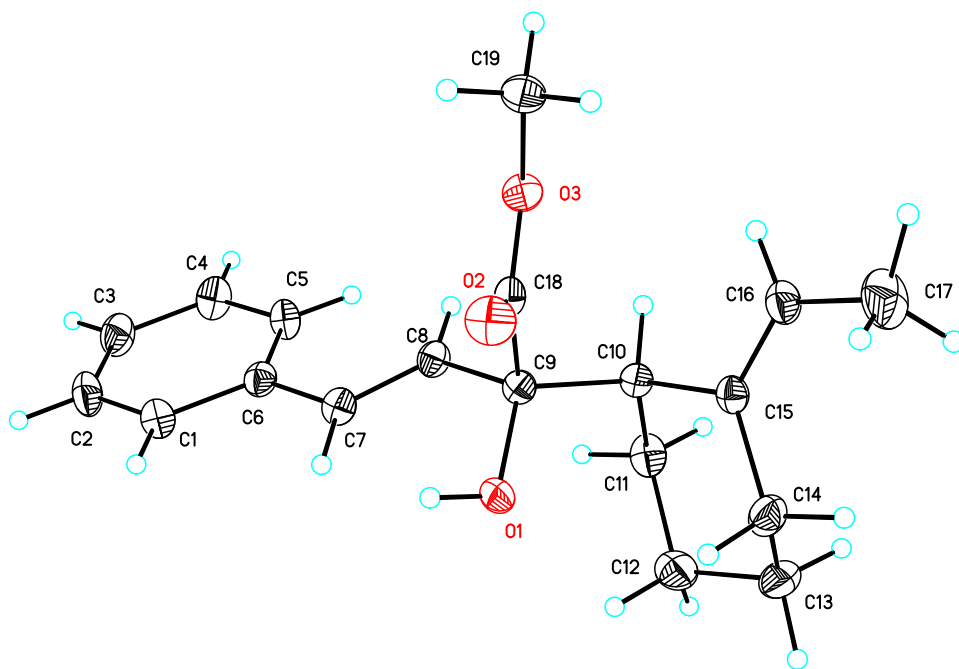

Table 1. Crystal data and structure refinement for **7h**.

|                        |                                                |                 |
|------------------------|------------------------------------------------|-----------------|
| Identification code    | <b>7h</b>                                      |                 |
| Empirical formula      | C <sub>19</sub> H <sub>24</sub> O <sub>3</sub> |                 |
| Formula weight         | 300.38                                         |                 |
| Temperature            | 173(2) K                                       |                 |
| Wavelength             | 1.54178 Å                                      |                 |
| Crystal system         | Triclinic                                      |                 |
| Space group            | P1                                             |                 |
| Unit cell dimensions   | a = 5.7546(12) Å                               | α = 104.48(2)°. |
|                        | b = 12.147(2) Å                                | β = 90.08(3)°.  |
|                        | c = 12.151(2) Å                                | γ = 90.16(3)°.  |
| Volume                 | 822.4(3) Å <sup>3</sup>                        |                 |
| Z                      | 2                                              |                 |
| Density (calculated)   | 1.213 Mg/m <sup>3</sup>                        |                 |
| Absorption coefficient | 0.641 mm <sup>-1</sup>                         |                 |
| F(000)                 | 324                                            |                 |
| Crystal size           | 0.34 x 0.10 x 0.09 mm <sup>3</sup>             |                 |

|                                   |                                             |
|-----------------------------------|---------------------------------------------|
| Theta range for data collection   | 3.76 to 65.09°.                             |
| Index ranges                      | -6<=h<=5, -14<=k<=14, -14<=l<=13            |
| Reflections collected             | 8095                                        |
| Independent reflections           | 3637 [R(int) = 0.0146]                      |
| Completeness to theta = 65.09°    | 87.7 %                                      |
| Absorption correction             | Semi-empirical from equivalents             |
| Max. and min. transmission        | 0.9446 and 0.8115                           |
| Refinement method                 | Full-matrix least-squares on F <sup>2</sup> |
| Data / restraints / parameters    | 3637 / 3 / 398                              |
| Goodness-of-fit on F <sup>2</sup> | 1.020                                       |
| Final R indices [I>2sigma(I)]     | R1 = 0.0299, wR2 = 0.0860                   |
| R indices (all data)              | R1 = 0.0300, wR2 = 0.0861                   |
| Absolute structure parameter      | -0.02(16)                                   |
| Extinction coefficient            | 0.0100(9)                                   |
| Largest diff. peak and hole       | 0.194 and -0.138 e.Å <sup>-3</sup>          |

Table 2. Atomic coordinates ( $\times 10^4$ ) and equivalent isotropic displacement parameters ( $\text{\AA}^2 \times 10^3$ ) for **7h**.  $U(\text{eq})$  is defined as one third of the trace of the orthogonalized  $U_{ij}$  tensor.

|       | x        | y         | z        | $U(\text{eq})$ |
|-------|----------|-----------|----------|----------------|
| C(1)  | -4649(4) | -10986(2) | -2261(2) | 34(1)          |
| C(2)  | -6004(4) | -11964(2) | -2567(2) | 38(1)          |
| C(3)  | -8104(4) | -11946(2) | -3097(2) | 38(1)          |
| C(4)  | -8882(4) | -10946(2) | -3323(2) | 37(1)          |
| C(5)  | -7531(4) | -9966(2)  | -3029(2) | 33(1)          |
| C(6)  | -5408(4) | -9967(2)  | -2482(2) | 27(1)          |
| C(7)  | -3926(4) | -8946(2)  | -2136(2) | 28(1)          |
| C(8)  | -4577(4) | -7892(2)  | -2085(2) | 26(1)          |
| C(9)  | -3022(3) | -6859(2)  | -1670(2) | 24(1)          |
| C(10) | -3470(4) | -5963(2)  | -2371(2) | 25(1)          |
| C(11) | -3018(4) | -6423(2)  | -3647(2) | 32(1)          |
| C(12) | -493(4)  | -6412(2)  | -4000(2) | 39(1)          |
| C(13) | 534(4)   | -5221(2)  | -3549(2) | 41(1)          |
| C(14) | 317(4)   | -4825(2)  | -2261(2) | 34(1)          |
| C(15) | -2139(4) | -4862(2)  | -1875(2) | 25(1)          |
| C(16) | -3171(4) | -4012(2)  | -1138(2) | 32(1)          |
| C(17) | -2059(5) | -2903(2)  | -520(3)  | 50(1)          |
| C(18) | -3627(4) | -6326(2)  | -421(2)  | 26(1)          |
| C(19) | -6572(4) | -5466(2)  | 853(2)   | 35(1)          |
| O(1)  | -660(2)  | -7197(1)  | -1711(1) | 29(1)          |
| O(2)  | -2234(3) | -6195(1)  | 336(2)   | 37(1)          |
| O(3)  | -5870(3) | -6047(1)  | -287(1)  | 29(1)          |
| C(1B) | -4419(4) | -4075(2)  | -5532(2) | 34(1)          |
| C(2B) | -3119(5) | -3082(2)  | -5360(2) | 40(1)          |
| C(3B) | -1047(5) | -3076(2)  | -5918(2) | 42(1)          |
| C(4B) | -262(5)  | -4052(2)  | -6648(2) | 40(1)          |
| C(5B) | -1546(4) | -5054(2)  | -6829(2) | 35(1)          |
| C(6B) | -3637(4) | -5079(2)  | -6271(2) | 28(1)          |
| C(7B) | -5067(4) | -6121(2)  | -6431(2) | 27(1)          |
| C(8B) | -4320(4) | -7171(2)  | -6886(2) | 26(1)          |
| C(9B) | -5828(4) | -8222(2)  | -7011(2) | 26(1)          |

|        |          |           |          |       |
|--------|----------|-----------|----------|-------|
| C(10B) | -5282(4) | -9103(2)  | -8161(2) | 25(1) |
| C(11B) | -5836(4) | -8652(2)  | -9207(2) | 33(1) |
| C(12B) | -8385(5) | -8737(2)  | -9569(2) | 41(1) |
| C(13B) | -9288(4) | -9943(2)  | -9707(2) | 42(1) |
| C(14B) | -8965(4) | -10334(2) | -8609(2) | 36(1) |
| C(15B) | -6450(4) | -10245(2) | -8239(2) | 27(1) |
| C(16B) | -5264(4) | -11087(2) | -7996(2) | 32(1) |
| C(17B) | -6157(5) | -12257(2) | -8002(3) | 52(1) |
| C(18B) | -5225(4) | -8773(2)  | -6040(2) | 27(1) |
| C(19B) | -2321(4) | -9659(2)  | -5204(2) | 37(1) |
| O(1B)  | -8199(2) | -7920(1)  | -6907(1) | 29(1) |
| O(2B)  | -6649(3) | -8945(1)  | -5377(2) | 38(1) |
| O(3B)  | -2979(3) | -9029(1)  | -6022(1) | 30(1) |

---

Table 3. Bond lengths [ $\text{\AA}$ ] and angles [ $^\circ$ ] for **7h**.

---

|              |          |
|--------------|----------|
| C(1)-C(2)    | 1.390(3) |
| C(1)-C(6)    | 1.401(3) |
| C(1)-H(1A)   | 0.9500   |
| C(2)-C(3)    | 1.372(4) |
| C(2)-H(2A)   | 0.9500   |
| C(3)-C(4)    | 1.386(3) |
| C(3)-H(3A)   | 0.9500   |
| C(4)-C(5)    | 1.390(3) |
| C(4)-H(4A)   | 0.9500   |
| C(5)-C(6)    | 1.390(3) |
| C(5)-H(5A)   | 0.9500   |
| C(6)-C(7)    | 1.474(3) |
| C(7)-C(8)    | 1.321(3) |
| C(7)-H(7A)   | 0.9500   |
| C(8)-C(9)    | 1.518(3) |
| C(8)-H(8A)   | 0.9500   |
| C(9)-O(1)    | 1.419(2) |
| C(9)-C(18)   | 1.535(3) |
| C(9)-C(10)   | 1.562(3) |
| C(10)-C(15)  | 1.526(3) |
| C(10)-C(11)  | 1.534(3) |
| C(10)-H(10A) | 1.0000   |
| C(11)-C(12)  | 1.516(3) |
| C(11)-H(11A) | 0.9900   |
| C(11)-H(11B) | 0.9900   |
| C(12)-C(13)  | 1.530(3) |
| C(12)-H(12A) | 0.9900   |
| C(12)-H(12B) | 0.9900   |
| C(13)-C(14)  | 1.524(4) |
| C(13)-H(13A) | 0.9900   |
| C(13)-H(13B) | 0.9900   |
| C(14)-C(15)  | 1.494(3) |
| C(14)-H(14A) | 0.9900   |
| C(14)-H(14B) | 0.9900   |

|               |          |
|---------------|----------|
| C(15)-C(16)   | 1.327(3) |
| C(16)-C(17)   | 1.509(3) |
| C(16)-H(16A)  | 0.9500   |
| C(17)-H(17A)  | 0.9800   |
| C(17)-H(17B)  | 0.9800   |
| C(17)-H(17C)  | 0.9800   |
| C(18)-O(2)    | 1.199(3) |
| C(18)-O(3)    | 1.335(3) |
| C(19)-O(3)    | 1.447(3) |
| C(19)-H(19A)  | 0.9800   |
| C(19)-H(19B)  | 0.9800   |
| C(19)-H(19C)  | 0.9800   |
| O(1)-H(1B)    | 0.8400   |
| C(1B)-C(2B)   | 1.388(3) |
| C(1B)-C(6B)   | 1.398(3) |
| C(1B)-H(1BA)  | 0.9500   |
| C(2B)-C(3B)   | 1.373(4) |
| C(2B)-H(2BA)  | 0.9500   |
| C(3B)-C(4B)   | 1.370(4) |
| C(3B)-H(3BA)  | 0.9500   |
| C(4B)-C(5B)   | 1.391(3) |
| C(4B)-H(4BA)  | 0.9500   |
| C(5B)-C(6B)   | 1.386(3) |
| C(5B)-H(5BA)  | 0.9500   |
| C(6B)-C(7B)   | 1.479(3) |
| C(7B)-C(8B)   | 1.329(3) |
| C(7B)-H(7BA)  | 0.9500   |
| C(8B)-C(9B)   | 1.518(3) |
| C(8B)-H(8BA)  | 0.9500   |
| C(9B)-O(1B)   | 1.411(3) |
| C(9B)-C(18B)  | 1.535(3) |
| C(9B)-C(10B)  | 1.566(3) |
| C(10B)-C(15B) | 1.521(3) |
| C(10B)-C(11B) | 1.539(3) |
| C(10B)-H(10B) | 1.0000   |
| C(11B)-C(12B) | 1.527(3) |

|                 |          |
|-----------------|----------|
| C(11B)-H(11C)   | 0.9900   |
| C(11B)-H(11D)   | 0.9900   |
| C(12B)-C(13B)   | 1.522(4) |
| C(12B)-H(12C)   | 0.9900   |
| C(12B)-H(12D)   | 0.9900   |
| C(13B)-C(14B)   | 1.535(4) |
| C(13B)-H(13C)   | 0.9900   |
| C(13B)-H(13D)   | 0.9900   |
| C(14B)-C(15B)   | 1.511(3) |
| C(14B)-H(14C)   | 0.9900   |
| C(14B)-H(14D)   | 0.9900   |
| C(15B)-C(16B)   | 1.324(3) |
| C(16B)-C(17B)   | 1.509(3) |
| C(16B)-H(16B)   | 0.9500   |
| C(17B)-H(17D)   | 0.9800   |
| C(17B)-H(17E)   | 0.9800   |
| C(17B)-H(17F)   | 0.9800   |
| C(18B)-O(2B)    | 1.204(3) |
| C(18B)-O(3B)    | 1.332(3) |
| C(19B)-O(3B)    | 1.449(3) |
| C(19B)-H(19D)   | 0.9800   |
| C(19B)-H(19E)   | 0.9800   |
| C(19B)-H(19F)   | 0.9800   |
| O(1B)-H(1BB)    | 0.8400   |
|                 |          |
| C(2)-C(1)-C(6)  | 120.7(2) |
| C(2)-C(1)-H(1A) | 119.6    |
| C(6)-C(1)-H(1A) | 119.6    |
| C(3)-C(2)-C(1)  | 120.2(2) |
| C(3)-C(2)-H(2A) | 119.9    |
| C(1)-C(2)-H(2A) | 119.9    |
| C(2)-C(3)-C(4)  | 119.8(2) |
| C(2)-C(3)-H(3A) | 120.1    |
| C(4)-C(3)-H(3A) | 120.1    |
| C(3)-C(4)-C(5)  | 120.4(2) |
| C(3)-C(4)-H(4A) | 119.8    |

|                     |            |
|---------------------|------------|
| C(5)-C(4)-H(4A)     | 119.8      |
| C(6)-C(5)-C(4)      | 120.53(19) |
| C(6)-C(5)-H(5A)     | 119.7      |
| C(4)-C(5)-H(5A)     | 119.7      |
| C(5)-C(6)-C(1)      | 118.31(18) |
| C(5)-C(6)-C(7)      | 122.69(18) |
| C(1)-C(6)-C(7)      | 119.0(2)   |
| C(8)-C(7)-C(6)      | 125.8(2)   |
| C(8)-C(7)-H(7A)     | 117.1      |
| C(6)-C(7)-H(7A)     | 117.1      |
| C(7)-C(8)-C(9)      | 124.0(2)   |
| C(7)-C(8)-H(8A)     | 118.0      |
| C(9)-C(8)-H(8A)     | 118.0      |
| O(1)-C(9)-C(8)      | 110.04(16) |
| O(1)-C(9)-C(18)     | 107.53(16) |
| C(8)-C(9)-C(18)     | 107.64(16) |
| O(1)-C(9)-C(10)     | 112.04(16) |
| C(8)-C(9)-C(10)     | 110.64(16) |
| C(18)-C(9)-C(10)    | 108.79(16) |
| C(15)-C(10)-C(11)   | 112.04(17) |
| C(15)-C(10)-C(9)    | 111.29(16) |
| C(11)-C(10)-C(9)    | 113.30(17) |
| C(15)-C(10)-H(10A)  | 106.6      |
| C(11)-C(10)-H(10A)  | 106.6      |
| C(9)-C(10)-H(10A)   | 106.6      |
| C(12)-C(11)-C(10)   | 115.09(19) |
| C(12)-C(11)-H(11A)  | 108.5      |
| C(10)-C(11)-H(11A)  | 108.5      |
| C(12)-C(11)-H(11B)  | 108.5      |
| C(10)-C(11)-H(11B)  | 108.5      |
| H(11A)-C(11)-H(11B) | 107.5      |
| C(11)-C(12)-C(13)   | 109.88(19) |
| C(11)-C(12)-H(12A)  | 109.7      |
| C(13)-C(12)-H(12A)  | 109.7      |
| C(11)-C(12)-H(12B)  | 109.7      |
| C(13)-C(12)-H(12B)  | 109.7      |



|                     |            |
|---------------------|------------|
| H(12A)-C(12)-H(12B) | 108.2      |
| C(14)-C(13)-C(12)   | 111.32(18) |
| C(14)-C(13)-H(13A)  | 109.4      |
| C(12)-C(13)-H(13A)  | 109.4      |
| C(14)-C(13)-H(13B)  | 109.4      |
| C(12)-C(13)-H(13B)  | 109.4      |
| H(13A)-C(13)-H(13B) | 108.0      |
| C(15)-C(14)-C(13)   | 112.08(19) |
| C(15)-C(14)-H(14A)  | 109.2      |
| C(13)-C(14)-H(14A)  | 109.2      |
| C(15)-C(14)-H(14B)  | 109.2      |
| C(13)-C(14)-H(14B)  | 109.2      |
| H(14A)-C(14)-H(14B) | 107.9      |
| C(16)-C(15)-C(14)   | 123.95(19) |
| C(16)-C(15)-C(10)   | 119.94(19) |
| C(14)-C(15)-C(10)   | 116.10(18) |
| C(15)-C(16)-C(17)   | 126.4(2)   |
| C(15)-C(16)-H(16A)  | 116.8      |
| C(17)-C(16)-H(16A)  | 116.8      |
| C(16)-C(17)-H(17A)  | 109.5      |
| C(16)-C(17)-H(17B)  | 109.5      |
| H(17A)-C(17)-H(17B) | 109.5      |
| C(16)-C(17)-H(17C)  | 109.5      |
| H(17A)-C(17)-H(17C) | 109.5      |
| H(17B)-C(17)-H(17C) | 109.5      |
| O(2)-C(18)-O(3)     | 124.8(2)   |
| O(2)-C(18)-C(9)     | 123.2(2)   |
| O(3)-C(18)-C(9)     | 111.93(17) |
| O(3)-C(19)-H(19A)   | 109.5      |
| O(3)-C(19)-H(19B)   | 109.5      |
| H(19A)-C(19)-H(19B) | 109.5      |
| O(3)-C(19)-H(19C)   | 109.5      |
| H(19A)-C(19)-H(19C) | 109.5      |
| H(19B)-C(19)-H(19C) | 109.5      |
| C(9)-O(1)-H(1B)     | 109.5      |
| C(18)-O(3)-C(19)    | 115.93(18) |

|                      |            |
|----------------------|------------|
| C(2B)-C(1B)-C(6B)    | 120.5(2)   |
| C(2B)-C(1B)-H(1BA)   | 119.7      |
| C(6B)-C(1B)-H(1BA)   | 119.7      |
| C(3B)-C(2B)-C(1B)    | 120.3(2)   |
| C(3B)-C(2B)-H(2BA)   | 119.9      |
| C(1B)-C(2B)-H(2BA)   | 119.9      |
| C(4B)-C(3B)-C(2B)    | 119.9(2)   |
| C(4B)-C(3B)-H(3BA)   | 120.1      |
| C(2B)-C(3B)-H(3BA)   | 120.1      |
| C(3B)-C(4B)-C(5B)    | 120.5(2)   |
| C(3B)-C(4B)-H(4BA)   | 119.7      |
| C(5B)-C(4B)-H(4BA)   | 119.7      |
| C(6B)-C(5B)-C(4B)    | 120.5(2)   |
| C(6B)-C(5B)-H(5BA)   | 119.8      |
| C(4B)-C(5B)-H(5BA)   | 119.8      |
| C(5B)-C(6B)-C(1B)    | 118.33(19) |
| C(5B)-C(6B)-C(7B)    | 122.67(19) |
| C(1B)-C(6B)-C(7B)    | 119.0(2)   |
| C(8B)-C(7B)-C(6B)    | 125.0(2)   |
| C(8B)-C(7B)-H(7BA)   | 117.5      |
| C(6B)-C(7B)-H(7BA)   | 117.5      |
| C(7B)-C(8B)-C(9B)    | 123.4(2)   |
| C(7B)-C(8B)-H(8BA)   | 118.3      |
| C(9B)-C(8B)-H(8BA)   | 118.3      |
| O(1B)-C(9B)-C(8B)    | 110.44(16) |
| O(1B)-C(9B)-C(18B)   | 107.68(16) |
| C(8B)-C(9B)-C(18B)   | 108.20(16) |
| O(1B)-C(9B)-C(10B)   | 112.41(17) |
| C(8B)-C(9B)-C(10B)   | 110.07(17) |
| C(18B)-C(9B)-C(10B)  | 107.89(15) |
| C(15B)-C(10B)-C(11B) | 111.44(17) |
| C(15B)-C(10B)-C(9B)  | 112.03(16) |
| C(11B)-C(10B)-C(9B)  | 112.95(16) |
| C(15B)-C(10B)-H(10B) | 106.6      |
| C(11B)-C(10B)-H(10B) | 106.6      |
| C(9B)-C(10B)-H(10B)  | 106.6      |

C(12B)-C(11B)-C(10B) 115.12(19)  
 C(12B)-C(11B)-H(11C) 108.5  
 C(10B)-C(11B)-H(11C) 108.5  
 C(12B)-C(11B)-H(11D) 108.5  
 C(10B)-C(11B)-H(11D) 108.5  
 H(11C)-C(11B)-H(11D) 107.5  
 C(13B)-C(12B)-C(11B) 110.50(18)  
 C(13B)-C(12B)-H(12C) 109.6  
 C(11B)-C(12B)-H(12C) 109.6  
 C(13B)-C(12B)-H(12D) 109.6  
 C(11B)-C(12B)-H(12D) 109.6  
 H(12C)-C(12B)-H(12D) 108.1  
 C(12B)-C(13B)-C(14B) 111.24(19)  
 C(12B)-C(13B)-H(13C) 109.4  
 C(14B)-C(13B)-H(13C) 109.4  
 C(12B)-C(13B)-H(13D) 109.4  
 C(14B)-C(13B)-H(13D) 109.4  
 H(13C)-C(13B)-H(13D) 108.0  
 C(15B)-C(14B)-C(13B) 111.1(2)  
 C(15B)-C(14B)-H(14C) 109.4  
 C(13B)-C(14B)-H(14C) 109.4  
 C(15B)-C(14B)-H(14D) 109.4  
 C(13B)-C(14B)-H(14D) 109.4  
 H(14C)-C(14B)-H(14D) 108.0  
 C(16B)-C(15B)-C(14B) 124.08(19)  
 C(16B)-C(15B)-C(10B) 120.13(19)  
 C(14B)-C(15B)-C(10B) 115.79(18)  
 C(15B)-C(16B)-C(17B) 127.1(2)  
 C(15B)-C(16B)-H(16B) 116.4  
 C(17B)-C(16B)-H(16B) 116.4  
 C(16B)-C(17B)-H(17D) 109.5  
 C(16B)-C(17B)-H(17E) 109.5  
 H(17D)-C(17B)-H(17E) 109.5  
 C(16B)-C(17B)-H(17F) 109.5  
 H(17D)-C(17B)-H(17F) 109.5  
 H(17E)-C(17B)-H(17F) 109.5

|                      |            |
|----------------------|------------|
| O(2B)-C(18B)-O(3B)   | 124.8(2)   |
| O(2B)-C(18B)-C(9B)   | 122.9(2)   |
| O(3B)-C(18B)-C(9B)   | 112.39(17) |
| O(3B)-C(19B)-H(19D)  | 109.5      |
| O(3B)-C(19B)-H(19E)  | 109.5      |
| H(19D)-C(19B)-H(19E) | 109.5      |
| O(3B)-C(19B)-H(19F)  | 109.5      |
| H(19D)-C(19B)-H(19F) | 109.5      |
| H(19E)-C(19B)-H(19F) | 109.5      |
| C(9B)-O(1B)-H(1BB)   | 109.5      |
| C(18B)-O(3B)-C(19B)  | 115.55(18) |

---

Table 4. Anisotropic displacement parameters ( $\text{\AA}^2 \times 10^3$ ) for **7h**. The anisotropic displacement factor exponent takes the form:  $-2\pi^2 [h^2 a^{*2} U_{11} + \dots + 2 h k a^* b^* U_{12}]$

|       | U11   | U22   | U33   | U23   | U13   | U12    |
|-------|-------|-------|-------|-------|-------|--------|
| C(1)  | 36(1) | 29(1) | 35(1) | 8(1)  | 0(1)  | 2(1)   |
| C(2)  | 48(2) | 25(1) | 44(2) | 13(1) | 1(1)  | 0(1)   |
| C(3)  | 47(1) | 28(1) | 38(1) | 7(1)  | -1(1) | -10(1) |
| C(4)  | 39(1) | 36(1) | 36(1) | 11(1) | -7(1) | -10(1) |
| C(5)  | 38(1) | 26(1) | 35(1) | 10(1) | -3(1) | -2(1)  |
| C(6)  | 34(1) | 25(1) | 23(1) | 5(1)  | 6(1)  | -1(1)  |
| C(7)  | 31(1) | 29(1) | 25(1) | 8(1)  | -2(1) | -1(1)  |
| C(8)  | 28(1) | 27(1) | 24(1) | 6(1)  | 0(1)  | -2(1)  |
| C(9)  | 22(1) | 26(1) | 24(1) | 6(1)  | 0(1)  | 1(1)   |
| C(10) | 24(1) | 25(1) | 26(1) | 5(1)  | -2(1) | -1(1)  |
| C(11) | 42(1) | 31(1) | 23(1) | 7(1)  | -3(1) | -1(1)  |
| C(12) | 46(2) | 43(1) | 28(1) | 10(1) | 9(1)  | 11(1)  |
| C(13) | 34(1) | 46(1) | 46(2) | 21(1) | 13(1) | 3(1)   |
| C(14) | 28(1) | 33(1) | 45(2) | 16(1) | -2(1) | -4(1)  |
| C(15) | 26(1) | 24(1) | 27(1) | 10(1) | -3(1) | -1(1)  |
| C(16) | 39(1) | 24(1) | 32(1) | 7(1)  | -1(1) | -1(1)  |
| C(17) | 67(2) | 29(1) | 48(2) | -2(1) | -2(2) | -6(1)  |
| C(18) | 29(1) | 21(1) | 29(1) | 10(1) | -3(1) | -3(1)  |
| C(19) | 41(1) | 32(1) | 29(1) | 3(1)  | 8(1)  | 3(1)   |
| O(1)  | 23(1) | 28(1) | 36(1) | 9(1)  | -2(1) | 2(1)   |
| O(2)  | 37(1) | 45(1) | 29(1) | 8(1)  | -9(1) | 0(1)   |
| O(3)  | 31(1) | 29(1) | 25(1) | 4(1)  | 2(1)  | 1(1)   |
| C(1B) | 39(1) | 30(1) | 34(1) | 7(1)  | 4(1)  | 2(1)   |
| C(2B) | 52(2) | 26(1) | 37(1) | -1(1) | 3(1)  | -1(1)  |
| C(3B) | 53(2) | 30(1) | 41(2) | 7(1)  | -4(1) | -15(1) |
| C(4B) | 41(1) | 38(1) | 39(1) | 8(1)  | 2(1)  | -11(1) |
| C(5B) | 39(1) | 29(1) | 33(1) | 3(1)  | 3(1)  | -3(1)  |
| C(6B) | 33(1) | 28(1) | 24(1) | 10(1) | -5(1) | -2(1)  |
| C(7B) | 32(1) | 27(1) | 23(1) | 7(1)  | -1(1) | -1(1)  |
| C(8B) | 26(1) | 28(1) | 24(1) | 8(1)  | -1(1) | 0(1)   |
| C(9B) | 25(1) | 25(1) | 26(1) | 5(1)  | 2(1)  | 1(1)   |

|        |       |       |       |       |       |       |
|--------|-------|-------|-------|-------|-------|-------|
| C(10B) | 23(1) | 24(1) | 26(1) | 6(1)  | 4(1)  | 0(1)  |
| C(11B) | 41(1) | 32(1) | 27(1) | 9(1)  | 4(1)  | 3(1)  |
| C(12B) | 46(2) | 47(1) | 30(1) | 11(1) | -3(1) | 14(1) |
| C(13B) | 33(1) | 50(1) | 36(1) | -2(1) | -9(1) | 5(1)  |
| C(14B) | 28(1) | 33(1) | 41(1) | 1(1)  | -1(1) | -3(1) |
| C(15B) | 26(1) | 27(1) | 25(1) | 2(1)  | 4(1)  | -3(1) |
| C(16B) | 33(1) | 26(1) | 35(1) | 6(1)  | 3(1)  | 1(1)  |
| C(17B) | 61(2) | 33(1) | 63(2) | 17(1) | 5(2)  | -6(1) |
| C(18B) | 30(1) | 24(1) | 25(1) | 3(1)  | 1(1)  | -4(1) |
| C(19B) | 42(1) | 38(1) | 36(1) | 18(1) | -4(1) | 2(1)  |
| O(1B)  | 25(1) | 28(1) | 31(1) | 5(1)  | 3(1)  | 0(1)  |
| O(2B)  | 37(1) | 49(1) | 32(1) | 17(1) | 7(1)  | -2(1) |
| O(3B)  | 30(1) | 31(1) | 30(1) | 12(1) | -1(1) | -1(1) |

---

Table 5. Hydrogen coordinates ( $\times 10^4$ ) and isotropic displacement parameters ( $\text{\AA}^2 \times 10^{-3}$ ) for **7h**.

|        | x      | y      | z     | U(eq) |
|--------|--------|--------|-------|-------|
| H(1A)  | -3192  | -11007 | -1899 | 40    |
| H(2A)  | -5473  | -12648 | -2408 | 46    |
| H(3A)  | -9023  | -12617 | -3310 | 45    |
| H(4A)  | -10348 | -10931 | -3679 | 44    |
| H(5A)  | -8062  | -9289  | -3204 | 39    |
| H(7A)  | -2366  | -9056  | -1931 | 33    |
| H(8A)  | -6109  | -7774  | -2322 | 32    |
| H(10A) | -5159  | -5770  | -2289 | 30    |
| H(11A) | -3603  | -7214  | -3884 | 38    |
| H(11B) | -3927  | -5966  | -4064 | 38    |
| H(12A) | -380   | -6638  | -4840 | 46    |
| H(12B) | 397    | -6966  | -3694 | 46    |
| H(13A) | 2194   | -5227  | -3763 | 49    |
| H(13B) | -286   | -4681  | -3902 | 49    |
| H(14A) | 1285   | -5315  | -1907 | 41    |
| H(14B) | 914    | -4037  | -2002 | 41    |
| H(16A) | -4765  | -4112  | -986  | 38    |
| H(17A) | -3211  | -2429  | -27   | 75    |
| H(17B) | -1484  | -2504  | -1075 | 75    |
| H(17C) | -759   | -3055  | -58   | 75    |
| H(19A) | -8236  | -5297  | 858   | 52    |
| H(19B) | -5691  | -4756  | 1103  | 52    |
| H(19C) | -6263  | -5954  | 1369  | 52    |
| H(1B)  | 112    | -6712  | -1235 | 43    |
| H(1BA) | -5853  | -4072  | -5144 | 41    |
| H(2BA) | -3665  | -2405  | -4855 | 48    |
| H(3BA) | -159   | -2395  | -5797 | 50    |
| H(4BA) | 1170   | -4045  | -7034 | 48    |
| H(5BA) | -985   | -5726  | -7338 | 42    |
| H(7BA) | -6640  | -6034  | -6189 | 33    |

|        |        |        |        |    |
|--------|--------|--------|--------|----|
| H(8BA) | -2761  | -7268  | -7147  | 31 |
| H(10B) | -3568  | -9240  | -8171  | 29 |
| H(11C) | -5351  | -7845  | -9045  | 39 |
| H(11D) | -4891  | -9079  | -9854  | 39 |
| H(12C) | -9320  | -8203  | -8990  | 49 |
| H(12D) | -8549  | -8519  | -10298 | 49 |
| H(13C) | -8445  | -10465 | -10334 | 50 |
| H(13D) | -10958 | -9974  | -9910  | 50 |
| H(14C) | -9931  | -9858  | -7999  | 43 |
| H(14D) | -9495  | -11132 | -8735  | 43 |
| H(16B) | -3676  | -10937 | -7796  | 38 |
| H(17D) | -4889  | -12711 | -7805  | 77 |
| H(17E) | -6752  | -12629 | -8760  | 77 |
| H(17F) | -7409  | -12193 | -7444  | 77 |
| H(19D) | -647   | -9810  | -5258  | 55 |
| H(19E) | -3174  | -10382 | -5364  | 55 |
| H(19F) | -2696  | -9213  | -4435  | 55 |
| H(1BB) | -8936  | -8396  | -6646  | 43 |

---



Table 6. Torsion angles [°] for **7h**.

---

|                         |             |
|-------------------------|-------------|
| C(6)-C(1)-C(2)-C(3)     | 0.4(4)      |
| C(1)-C(2)-C(3)-C(4)     | -0.4(4)     |
| C(2)-C(3)-C(4)-C(5)     | 1.0(4)      |
| C(3)-C(4)-C(5)-C(6)     | -1.5(4)     |
| C(4)-C(5)-C(6)-C(1)     | 1.5(3)      |
| C(4)-C(5)-C(6)-C(7)     | -179.0(2)   |
| C(2)-C(1)-C(6)-C(5)     | -1.0(3)     |
| C(2)-C(1)-C(6)-C(7)     | 179.5(2)    |
| C(5)-C(6)-C(7)-C(8)     | 14.3(4)     |
| C(1)-C(6)-C(7)-C(8)     | -166.2(2)   |
| C(6)-C(7)-C(8)-C(9)     | 177.0(2)    |
| C(7)-C(8)-C(9)-O(1)     | 19.1(3)     |
| C(7)-C(8)-C(9)-C(18)    | -97.8(2)    |
| C(7)-C(8)-C(9)-C(10)    | 143.5(2)    |
| O(1)-C(9)-C(10)-C(15)   | -63.7(2)    |
| C(8)-C(9)-C(10)-C(15)   | 173.14(18)  |
| C(18)-C(9)-C(10)-C(15)  | 55.1(2)     |
| O(1)-C(9)-C(10)-C(11)   | 63.7(2)     |
| C(8)-C(9)-C(10)-C(11)   | -59.5(2)    |
| C(18)-C(9)-C(10)-C(11)  | -177.58(17) |
| C(15)-C(10)-C(11)-C(12) | 45.0(2)     |
| C(9)-C(10)-C(11)-C(12)  | -82.0(2)    |
| C(10)-C(11)-C(12)-C(13) | -52.9(3)    |
| C(11)-C(12)-C(13)-C(14) | 57.4(3)     |
| C(12)-C(13)-C(14)-C(15) | -55.7(3)    |
| C(13)-C(14)-C(15)-C(16) | -131.9(2)   |
| C(13)-C(14)-C(15)-C(10) | 48.6(2)     |
| C(11)-C(10)-C(15)-C(16) | 138.0(2)    |
| C(9)-C(10)-C(15)-C(16)  | -94.0(2)    |
| C(11)-C(10)-C(15)-C(14) | -42.5(3)    |
| C(9)-C(10)-C(15)-C(14)  | 85.5(2)     |
| C(14)-C(15)-C(16)-C(17) | -3.4(4)     |
| C(10)-C(15)-C(16)-C(17) | 176.0(2)    |
| O(1)-C(9)-C(18)-O(2)    | 3.3(2)      |

|                             |             |
|-----------------------------|-------------|
| C(8)-C(9)-C(18)-O(2)        | 121.8(2)    |
| C(10)-C(9)-C(18)-O(2)       | -118.3(2)   |
| O(1)-C(9)-C(18)-O(3)        | -175.92(13) |
| C(8)-C(9)-C(18)-O(3)        | -57.4(2)    |
| C(10)-C(9)-C(18)-O(3)       | 62.53(19)   |
| O(2)-C(18)-O(3)-C(19)       | 4.9(3)      |
| C(9)-C(18)-O(3)-C(19)       | -175.89(15) |
| C(6B)-C(1B)-C(2B)-C(3B)     | 0.1(4)      |
| C(1B)-C(2B)-C(3B)-C(4B)     | 0.2(4)      |
| C(2B)-C(3B)-C(4B)-C(5B)     | -0.2(4)     |
| C(3B)-C(4B)-C(5B)-C(6B)     | -0.1(4)     |
| C(4B)-C(5B)-C(6B)-C(1B)     | 0.4(3)      |
| C(4B)-C(5B)-C(6B)-C(7B)     | -179.9(2)   |
| C(2B)-C(1B)-C(6B)-C(5B)     | -0.4(3)     |
| C(2B)-C(1B)-C(6B)-C(7B)     | 179.9(2)    |
| C(5B)-C(6B)-C(7B)-C(8B)     | 16.5(3)     |
| C(1B)-C(6B)-C(7B)-C(8B)     | -163.8(2)   |
| C(6B)-C(7B)-C(8B)-C(9B)     | 178.52(19)  |
| C(7B)-C(8B)-C(9B)-O(1B)     | 17.5(3)     |
| C(7B)-C(8B)-C(9B)-C(18B)    | -100.1(2)   |
| C(7B)-C(8B)-C(9B)-C(10B)    | 142.2(2)    |
| O(1B)-C(9B)-C(10B)-C(15B)   | -65.9(2)    |
| C(8B)-C(9B)-C(10B)-C(15B)   | 170.57(17)  |
| C(18B)-C(9B)-C(10B)-C(15B)  | 52.7(2)     |
| O(1B)-C(9B)-C(10B)-C(11B)   | 61.0(2)     |
| C(8B)-C(9B)-C(10B)-C(11B)   | -62.6(2)    |
| C(18B)-C(9B)-C(10B)-C(11B)  | 179.53(17)  |
| C(15B)-C(10B)-C(11B)-C(12B) | 45.6(3)     |
| C(9B)-C(10B)-C(11B)-C(12B)  | -81.5(2)    |
| C(10B)-C(11B)-C(12B)-C(13B) | -52.2(3)    |
| C(11B)-C(12B)-C(13B)-C(14B) | 56.7(3)     |
| C(12B)-C(13B)-C(14B)-C(15B) | -56.4(3)    |
| C(13B)-C(14B)-C(15B)-C(16B) | -128.3(2)   |
| C(13B)-C(14B)-C(15B)-C(10B) | 51.3(2)     |
| C(11B)-C(10B)-C(15B)-C(16B) | 134.3(2)    |
| C(9B)-C(10B)-C(15B)-C(16B)  | -98.1(2)    |

|                             |             |
|-----------------------------|-------------|
| C(11B)-C(10B)-C(15B)-C(14B) | -45.3(3)    |
| C(9B)-C(10B)-C(15B)-C(14B)  | 82.4(2)     |
| C(14B)-C(15B)-C(16B)-C(17B) | -2.0(4)     |
| C(10B)-C(15B)-C(16B)-C(17B) | 178.5(2)    |
| O(1B)-C(9B)-C(18B)-O(2B)    | 3.6(2)      |
| C(8B)-C(9B)-C(18B)-O(2B)    | 123.0(2)    |
| C(10B)-C(9B)-C(18B)-O(2B)   | -118.0(2)   |
| O(1B)-C(9B)-C(18B)-O(3B)    | -176.29(16) |
| C(8B)-C(9B)-C(18B)-O(3B)    | -56.9(2)    |
| C(10B)-C(9B)-C(18B)-O(3B)   | 62.15(19)   |
| O(2B)-C(18B)-O(3B)-C(19B)   | 6.3(3)      |
| C(9B)-C(18B)-O(3B)-C(19B)   | -173.82(17) |

---

Table 7. Hydrogen bonds for **7h** [ $\text{\AA}$  and  $^\circ$ ].

| D-H...A                | d(D-H) | d(H...A) | d(D...A) | $\angle(\text{DHA})$ |
|------------------------|--------|----------|----------|----------------------|
| O(1)-H(1B)...O(3)#1    | 0.84   | 2.62     | 3.361(2) | 148.5                |
| O(1B)-H(1BB)...O(3B)#2 | 0.84   | 2.62     | 3.354(2) | 146.7                |

Symmetry transformations used to generate equivalent atoms:

#1  $x+1, y, z$  #2  $x-1, y, z$

7j

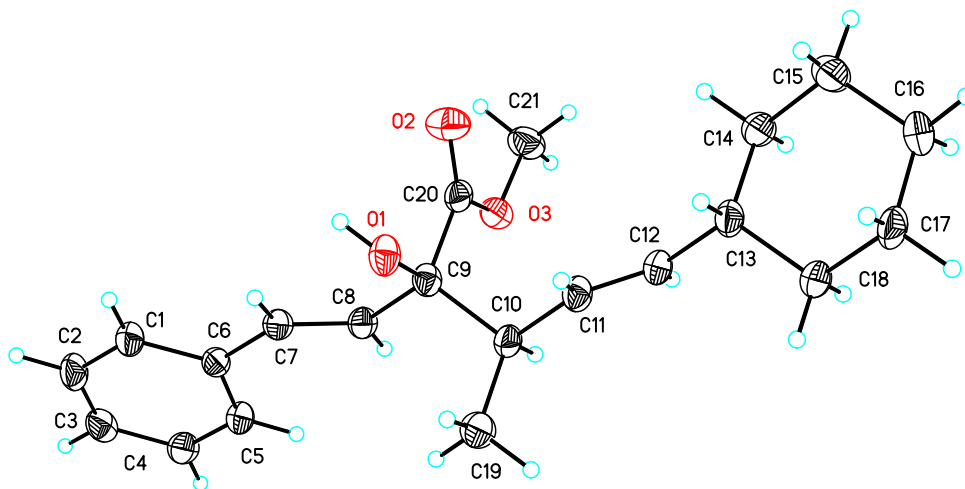Table 1. Crystal data and structure refinement for **7j**.

|                                 |                                                |                  |
|---------------------------------|------------------------------------------------|------------------|
| Identification code             | <b>7j</b>                                      |                  |
| Empirical formula               | C <sub>21</sub> H <sub>28</sub> O <sub>3</sub> |                  |
| Formula weight                  | 328.43                                         |                  |
| Temperature                     | 173(2) K                                       |                  |
| Wavelength                      | 1.54178 Å                                      |                  |
| Crystal system                  | Triclinic                                      |                  |
| Space group                     | P1                                             |                  |
| Unit cell dimensions            | a = 5.5849(4) Å                                | α = 116.623(5)°. |
|                                 | b = 9.4558(6) Å                                | β = 94.611(6)°.  |
|                                 | c = 9.9361(7) Å                                | γ = 90.704(4)°.  |
| Volume                          | 466.88(6) Å <sup>3</sup>                       |                  |
| Z                               | 1                                              |                  |
| Density (calculated)            | 1.168 Mg/m <sup>3</sup>                        |                  |
| Absorption coefficient          | 0.604 mm <sup>-1</sup>                         |                  |
| F(000)                          | 178                                            |                  |
| Crystal size                    | 0.25 x 0.18 x 0.09 mm <sup>3</sup>             |                  |
| Theta range for data collection | 5.00 to 67.44°.                                |                  |
| Index ranges                    | -6 ≤ h ≤ 6, -11 ≤ k ≤ 11, -11 ≤ l ≤ 11         |                  |
| Reflections collected           | 3568                                           |                  |
| Independent reflections         | 1969 [R(int) = 0.0221]                         |                  |

|                                   |                                             |
|-----------------------------------|---------------------------------------------|
| Completeness to theta = 67.44°    | 82.5 %                                      |
| Absorption correction             | Semi-empirical from equivalents             |
| Max. and min. transmission        | 0.9477 and 0.8637                           |
| Refinement method                 | Full-matrix least-squares on F <sup>2</sup> |
| Data / restraints / parameters    | 1969 / 3 / 217                              |
| Goodness-of-fit on F <sup>2</sup> | 1.048                                       |
| Final R indices [I>2sigma(I)]     | R1 = 0.0448, wR2 = 0.1175                   |
| R indices (all data)              | R1 = 0.0484, wR2 = 0.1214                   |
| Absolute structure parameter      | 0.0(3)                                      |
| Largest diff. peak and hole       | 0.200 and -0.203 e.Å <sup>-3</sup>          |

Table 2. Atomic coordinates ( $\times 10^4$ ) and equivalent isotropic displacement parameters ( $\text{\AA}^2 \times 10^3$ ) for **7j**.  $U(\text{eq})$  is defined as one third of the trace of the orthogonalized  $U^{ij}$  tensor.

|       | x         | y         | z         | $U(\text{eq})$ |
|-------|-----------|-----------|-----------|----------------|
| C(1)  | -2307(5)  | -9699(3)  | -4730(4)  | 36(1)          |
| C(2)  | -640(6)   | -10279(4) | -3999(4)  | 41(1)          |
| C(3)  | 1493(5)   | -9456(4)  | -3307(4)  | 39(1)          |
| C(4)  | 2021(5)   | -8038(4)  | -3343(4)  | 37(1)          |
| C(5)  | 392(5)    | -7454(3)  | -4079(4)  | 33(1)          |
| C(6)  | -1791(5)  | -8280(3)  | -4788(3)  | 30(1)          |
| C(7)  | -3563(5)  | -7712(3)  | -5591(3)  | 30(1)          |
| C(8)  | -3141(4)  | -6641(3)  | -6066(3)  | 29(1)          |
| C(9)  | -5058(4)  | -6134(3)  | -6907(3)  | 29(1)          |
| C(10) | -5068(4)  | -4302(3)  | -6244(3)  | 30(1)          |
| C(11) | -6930(5)  | -3852(3)  | -7143(3)  | 32(1)          |
| C(12) | -6537(5)  | -3162(3)  | -8004(3)  | 32(1)          |
| C(13) | -8505(5)  | -2727(3)  | -8861(3)  | 33(1)          |
| C(14) | -8172(6)  | -3432(3)  | -10550(3) | 40(1)          |
| C(15) | -10283(6) | -3052(4)  | -11404(4) | 47(1)          |
| C(16) | -10576(6) | -1272(4)  | -10739(4) | 46(1)          |
| C(17) | -10812(5) | -540(4)   | -9054(4)  | 41(1)          |
| C(18) | -8694(5)  | -939(3)   | -8215(4)  | 37(1)          |
| C(19) | -5555(6)  | -3570(4)  | -4580(4)  | 41(1)          |
| C(20) | -4571(5)  | -6847(3)  | -8577(4)  | 31(1)          |
| C(21) | -1845(6)  | -6927(4)  | -10283(4) | 44(1)          |
| O(1)  | -7369(3)  | -6737(2)  | -6853(3)  | 36(1)          |
| O(2)  | -5972(4)  | -7755(3)  | -9582(3)  | 49(1)          |
| O(3)  | -2447(3)  | -6335(2)  | -8750(2)  | 35(1)          |

Table 3. Bond lengths [Å] and angles [°] for **7j**.

---

|              |          |
|--------------|----------|
| C(1)-C(6)    | 1.396(4) |
| C(1)-C(2)    | 1.399(4) |
| C(1)-H(1A)   | 0.9500   |
| C(2)-C(3)    | 1.365(5) |
| C(2)-H(2A)   | 0.9500   |
| C(3)-C(4)    | 1.387(4) |
| C(3)-H(3A)   | 0.9500   |
| C(4)-C(5)    | 1.390(4) |
| C(4)-H(4A)   | 0.9500   |
| C(5)-C(6)    | 1.393(4) |
| C(5)-H(5A)   | 0.9500   |
| C(6)-C(7)    | 1.475(4) |
| C(7)-C(8)    | 1.321(4) |
| C(7)-H(7A)   | 0.9500   |
| C(8)-C(9)    | 1.517(3) |
| C(8)-H(8A)   | 0.9500   |
| C(9)-O(1)    | 1.419(3) |
| C(9)-C(20)   | 1.535(4) |
| C(9)-C(10)   | 1.553(3) |
| C(10)-C(11)  | 1.504(3) |
| C(10)-C(19)  | 1.529(4) |
| C(10)-H(10A) | 1.0000   |
| C(11)-C(12)  | 1.317(4) |
| C(11)-H(11A) | 0.9500   |
| C(12)-C(13)  | 1.508(4) |
| C(12)-H(12A) | 0.9500   |
| C(13)-C(18)  | 1.524(4) |
| C(13)-C(14)  | 1.531(4) |
| C(13)-H(13A) | 1.0000   |
| C(14)-C(15)  | 1.537(4) |
| C(14)-H(14A) | 0.9900   |
| C(14)-H(14B) | 0.9900   |
| C(15)-C(16)  | 1.524(4) |
| C(15)-H(15A) | 0.9900   |



|              |          |
|--------------|----------|
| C(15)-H(15B) | 0.9900   |
| C(16)-C(17)  | 1.516(5) |
| C(16)-H(16A) | 0.9900   |
| C(16)-H(16B) | 0.9900   |
| C(17)-C(18)  | 1.540(4) |
| C(17)-H(17A) | 0.9900   |
| C(17)-H(17B) | 0.9900   |
| C(18)-H(18A) | 0.9900   |
| C(18)-H(18B) | 0.9900   |
| C(19)-H(19A) | 0.9800   |
| C(19)-H(19B) | 0.9800   |
| C(19)-H(19C) | 0.9800   |
| C(20)-O(2)   | 1.198(4) |
| C(20)-O(3)   | 1.329(3) |
| C(21)-O(3)   | 1.439(4) |
| C(21)-H(21A) | 0.9800   |
| C(21)-H(21B) | 0.9800   |
| C(21)-H(21C) | 0.9800   |
| O(1)-H(1B)   | 0.8400   |

|                 |          |
|-----------------|----------|
| C(6)-C(1)-C(2)  | 120.4(3) |
| C(6)-C(1)-H(1A) | 119.8    |
| C(2)-C(1)-H(1A) | 119.8    |
| C(3)-C(2)-C(1)  | 120.7(3) |
| C(3)-C(2)-H(2A) | 119.6    |
| C(1)-C(2)-H(2A) | 119.6    |
| C(2)-C(3)-C(4)  | 119.6(3) |
| C(2)-C(3)-H(3A) | 120.2    |
| C(4)-C(3)-H(3A) | 120.2    |
| C(3)-C(4)-C(5)  | 120.3(3) |
| C(3)-C(4)-H(4A) | 119.8    |
| C(5)-C(4)-H(4A) | 119.8    |
| C(4)-C(5)-C(6)  | 120.7(2) |
| C(4)-C(5)-H(5A) | 119.7    |
| C(6)-C(5)-H(5A) | 119.7    |
| C(5)-C(6)-C(1)  | 118.3(2) |

|                    |            |
|--------------------|------------|
| C(5)-C(6)-C(7)     | 122.5(2)   |
| C(1)-C(6)-C(7)     | 119.2(2)   |
| C(8)-C(7)-C(6)     | 126.2(2)   |
| C(8)-C(7)-H(7A)    | 116.9      |
| C(6)-C(7)-H(7A)    | 116.9      |
| C(7)-C(8)-C(9)     | 123.1(2)   |
| C(7)-C(8)-H(8A)    | 118.4      |
| C(9)-C(8)-H(8A)    | 118.4      |
| O(1)-C(9)-C(8)     | 110.6(2)   |
| O(1)-C(9)-C(20)    | 107.2(2)   |
| C(8)-C(9)-C(20)    | 108.6(2)   |
| O(1)-C(9)-C(10)    | 109.1(2)   |
| C(8)-C(9)-C(10)    | 111.7(2)   |
| C(20)-C(9)-C(10)   | 109.49(18) |
| C(11)-C(10)-C(19)  | 110.6(2)   |
| C(11)-C(10)-C(9)   | 110.0(2)   |
| C(19)-C(10)-C(9)   | 110.3(2)   |
| C(11)-C(10)-H(10A) | 108.6      |
| C(19)-C(10)-H(10A) | 108.6      |
| C(9)-C(10)-H(10A)  | 108.6      |
| C(12)-C(11)-C(10)  | 126.9(2)   |
| C(12)-C(11)-H(11A) | 116.5      |
| C(10)-C(11)-H(11A) | 116.5      |
| C(11)-C(12)-C(13)  | 124.0(2)   |
| C(11)-C(12)-H(12A) | 118.0      |
| C(13)-C(12)-H(12A) | 118.0      |
| C(12)-C(13)-C(18)  | 112.1(2)   |
| C(12)-C(13)-C(14)  | 111.8(2)   |
| C(18)-C(13)-C(14)  | 109.8(2)   |
| C(12)-C(13)-H(13A) | 107.7      |
| C(18)-C(13)-H(13A) | 107.7      |
| C(14)-C(13)-H(13A) | 107.7      |
| C(13)-C(14)-C(15)  | 110.5(2)   |
| C(13)-C(14)-H(14A) | 109.5      |
| C(15)-C(14)-H(14A) | 109.5      |
| C(13)-C(14)-H(14B) | 109.5      |

|                     |          |
|---------------------|----------|
| C(15)-C(14)-H(14B)  | 109.5    |
| H(14A)-C(14)-H(14B) | 108.1    |
| C(16)-C(15)-C(14)   | 111.2(3) |
| C(16)-C(15)-H(15A)  | 109.4    |
| C(14)-C(15)-H(15A)  | 109.4    |
| C(16)-C(15)-H(15B)  | 109.4    |
| C(14)-C(15)-H(15B)  | 109.4    |
| H(15A)-C(15)-H(15B) | 108.0    |
| C(17)-C(16)-C(15)   | 111.9(2) |
| C(17)-C(16)-H(16A)  | 109.2    |
| C(15)-C(16)-H(16A)  | 109.2    |
| C(17)-C(16)-H(16B)  | 109.2    |
| C(15)-C(16)-H(16B)  | 109.2    |
| H(16A)-C(16)-H(16B) | 107.9    |
| C(16)-C(17)-C(18)   | 111.1(3) |
| C(16)-C(17)-H(17A)  | 109.4    |
| C(18)-C(17)-H(17A)  | 109.4    |
| C(16)-C(17)-H(17B)  | 109.4    |
| C(18)-C(17)-H(17B)  | 109.4    |
| H(17A)-C(17)-H(17B) | 108.0    |
| C(13)-C(18)-C(17)   | 110.7(2) |
| C(13)-C(18)-H(18A)  | 109.5    |
| C(17)-C(18)-H(18A)  | 109.5    |
| C(13)-C(18)-H(18B)  | 109.5    |
| C(17)-C(18)-H(18B)  | 109.5    |
| H(18A)-C(18)-H(18B) | 108.1    |
| C(10)-C(19)-H(19A)  | 109.5    |
| C(10)-C(19)-H(19B)  | 109.5    |
| H(19A)-C(19)-H(19B) | 109.5    |
| C(10)-C(19)-H(19C)  | 109.5    |
| H(19A)-C(19)-H(19C) | 109.5    |
| H(19B)-C(19)-H(19C) | 109.5    |
| O(2)-C(20)-O(3)     | 125.3(3) |
| O(2)-C(20)-C(9)     | 122.8(2) |
| O(3)-C(20)-C(9)     | 111.9(2) |
| O(3)-C(21)-H(21A)   | 109.5    |

|                     |          |
|---------------------|----------|
| O(3)-C(21)-H(21B)   | 109.5    |
| H(21A)-C(21)-H(21B) | 109.5    |
| O(3)-C(21)-H(21C)   | 109.5    |
| H(21A)-C(21)-H(21C) | 109.5    |
| H(21B)-C(21)-H(21C) | 109.5    |
| C(9)-O(1)-H(1B)     | 109.5    |
| C(20)-O(3)-C(21)    | 115.9(2) |

---

Table 4. Anisotropic displacement parameters ( $\text{\AA}^2 \times 10^3$ ) for **7j**. The anisotropic displacement factor exponent takes the form:  $-2\pi^2 [ h^2 a^{*2} U^{11} + \dots + 2 h k a^* b^* U^{12} ]$

|       | U11   | U22   | U33   | U23   | U13   | U12   |
|-------|-------|-------|-------|-------|-------|-------|
| C(1)  | 44(1) | 30(1) | 38(2) | 19(1) | 5(1)  | 4(1)  |
| C(2)  | 58(2) | 32(2) | 44(2) | 24(1) | 11(2) | 14(1) |
| C(3)  | 48(2) | 38(2) | 35(2) | 20(1) | 7(1)  | 19(1) |
| C(4)  | 41(1) | 33(1) | 37(2) | 15(1) | 3(1)  | 8(1)  |
| C(5)  | 38(1) | 29(1) | 37(2) | 17(1) | 3(1)  | 5(1)  |
| C(6)  | 40(1) | 25(1) | 27(2) | 12(1) | 7(1)  | 9(1)  |
| C(7)  | 31(1) | 28(1) | 30(2) | 13(1) | 2(1)  | 5(1)  |
| C(8)  | 29(1) | 27(1) | 32(2) | 14(1) | 3(1)  | 6(1)  |
| C(9)  | 25(1) | 30(1) | 34(2) | 18(1) | -1(1) | 3(1)  |
| C(10) | 34(1) | 24(1) | 34(2) | 15(1) | 1(1)  | 4(1)  |
| C(11) | 33(1) | 28(1) | 37(2) | 17(1) | 3(1)  | 8(1)  |
| C(12) | 37(1) | 26(1) | 36(2) | 15(1) | 3(1)  | 7(1)  |
| C(13) | 37(1) | 28(1) | 38(2) | 19(1) | 3(1)  | 6(1)  |
| C(14) | 52(2) | 30(2) | 33(2) | 11(1) | 2(1)  | 14(1) |
| C(15) | 59(2) | 45(2) | 34(2) | 16(2) | -4(2) | 12(2) |
| C(16) | 58(2) | 41(2) | 49(2) | 30(2) | -2(2) | 9(1)  |
| C(17) | 45(1) | 27(1) | 52(2) | 21(1) | -1(1) | 10(1) |
| C(18) | 45(1) | 27(1) | 38(2) | 15(1) | 2(1)  | 9(1)  |
| C(19) | 51(2) | 36(2) | 37(2) | 16(1) | 5(1)  | 13(1) |
| C(20) | 33(1) | 25(1) | 36(2) | 15(1) | -3(1) | 5(1)  |
| C(21) | 52(2) | 49(2) | 30(2) | 16(1) | 8(1)  | 7(1)  |
| O(1)  | 29(1) | 37(1) | 49(1) | 27(1) | 2(1)  | 3(1)  |
| O(2)  | 48(1) | 51(1) | 38(1) | 12(1) | -5(1) | -6(1) |
| O(3)  | 36(1) | 38(1) | 31(1) | 16(1) | 2(1)  | 4(1)  |

Table 5. Hydrogen coordinates ( $\times 10^4$ ) and isotropic displacement parameters ( $\text{\AA}^2 \times 10^{-3}$ ) for **7j**.

|        | x      | y      | z      | U(eq) |
|--------|--------|--------|--------|-------|
| H(1A)  | -3799  | -10273 | -5188  | 43    |
| H(2A)  | -996   | -11257 | -3984  | 50    |
| H(3A)  | 2609   | -9853  | -2804  | 46    |
| H(4A)  | 3504   | -7461  | -2863  | 44    |
| H(5A)  | 773    | -6481  | -4097  | 40    |
| H(7A)  | -5161  | -8159  | -5785  | 35    |
| H(8A)  | -1561  | -6166  | -5872  | 35    |
| H(10A) | -3450  | -3890  | -6316  | 36    |
| H(11A) | -8563  | -4093  | -7084  | 38    |
| H(12A) | -4917  | -2922  | -8091  | 39    |
| H(13A) | -10065 | -3183  | -8758  | 39    |
| H(14A) | -8075  | -4595  | -10968 | 48    |
| H(14B) | -6647  | -2992  | -10688 | 48    |
| H(15A) | -9997  | -3470  | -12483 | 56    |
| H(15B) | -11784 | -3582  | -11348 | 56    |
| H(16A) | -9165  | -762   | -10922 | 56    |
| H(16B) | -12025 | -1071  | -11256 | 56    |
| H(17A) | -12341 | -940   | -8876  | 49    |
| H(17B) | -10859 | 625    | -8649  | 49    |
| H(18A) | -7178  | -455   | -8314  | 44    |
| H(18B) | -8928  | -490   | -7127  | 44    |
| H(19A) | -5565  | -2416  | -4177  | 62    |
| H(19B) | -4293  | -3841  | -4005  | 62    |
| H(19C) | -7121  | -3984  | -4492  | 62    |
| H(21A) | -257   | -6478  | -10288 | 66    |
| H(21B) | -3050  | -6621  | -10863 | 66    |
| H(21C) | -1818  | -8084  | -10743 | 66    |
| H(1B)  | -7372  | -7727  | -7209  | 54    |

Table 6. Torsion angles [°] for **7j**.

---

|                         |           |
|-------------------------|-----------|
| C(6)-C(1)-C(2)-C(3)     | 1.3(4)    |
| C(1)-C(2)-C(3)-C(4)     | -0.7(5)   |
| C(2)-C(3)-C(4)-C(5)     | 0.0(5)    |
| C(3)-C(4)-C(5)-C(6)     | 0.0(4)    |
| C(4)-C(5)-C(6)-C(1)     | 0.6(4)    |
| C(4)-C(5)-C(6)-C(7)     | -179.5(3) |
| C(2)-C(1)-C(6)-C(5)     | -1.2(4)   |
| C(2)-C(1)-C(6)-C(7)     | 178.9(3)  |
| C(5)-C(6)-C(7)-C(8)     | 17.8(4)   |
| C(1)-C(6)-C(7)-C(8)     | -162.3(3) |
| C(6)-C(7)-C(8)-C(9)     | 179.1(2)  |
| C(7)-C(8)-C(9)-O(1)     | 10.7(4)   |
| C(7)-C(8)-C(9)-C(20)    | -106.7(3) |
| C(7)-C(8)-C(9)-C(10)    | 132.4(3)  |
| O(1)-C(9)-C(10)-C(11)   | -59.4(3)  |
| C(8)-C(9)-C(10)-C(11)   | 178.0(2)  |
| C(20)-C(9)-C(10)-C(11)  | 57.7(2)   |
| O(1)-C(9)-C(10)-C(19)   | 62.8(3)   |
| C(8)-C(9)-C(10)-C(19)   | -59.8(3)  |
| C(20)-C(9)-C(10)-C(19)  | 179.9(2)  |
| C(19)-C(10)-C(11)-C(12) | 124.9(3)  |
| C(9)-C(10)-C(11)-C(12)  | -113.0(3) |
| C(10)-C(11)-C(12)-C(13) | -179.2(3) |
| C(11)-C(12)-C(13)-C(18) | 110.9(3)  |
| C(11)-C(12)-C(13)-C(14) | -125.4(3) |
| C(12)-C(13)-C(14)-C(15) | 176.6(2)  |
| C(18)-C(13)-C(14)-C(15) | -58.3(3)  |
| C(13)-C(14)-C(15)-C(16) | 56.2(3)   |
| C(14)-C(15)-C(16)-C(17) | -54.3(4)  |
| C(15)-C(16)-C(17)-C(18) | 54.3(4)   |
| C(12)-C(13)-C(18)-C(17) | -176.6(2) |
| C(14)-C(13)-C(18)-C(17) | 58.5(3)   |
| C(16)-C(17)-C(18)-C(13) | -56.6(3)  |
| O(1)-C(9)-C(20)-O(2)    | -0.9(3)   |

|                       |           |
|-----------------------|-----------|
| C(8)-C(9)-C(20)-O(2)  | 118.7(3)  |
| C(10)-C(9)-C(20)-O(2) | -119.1(3) |
| O(1)-C(9)-C(20)-O(3)  | 179.2(2)  |
| C(8)-C(9)-C(20)-O(3)  | -61.3(2)  |
| C(10)-C(9)-C(20)-O(3) | 60.9(2)   |
| O(2)-C(20)-O(3)-C(21) | 0.7(4)    |
| C(9)-C(20)-O(3)-C(21) | -179.3(2) |

---



*epi-7j*

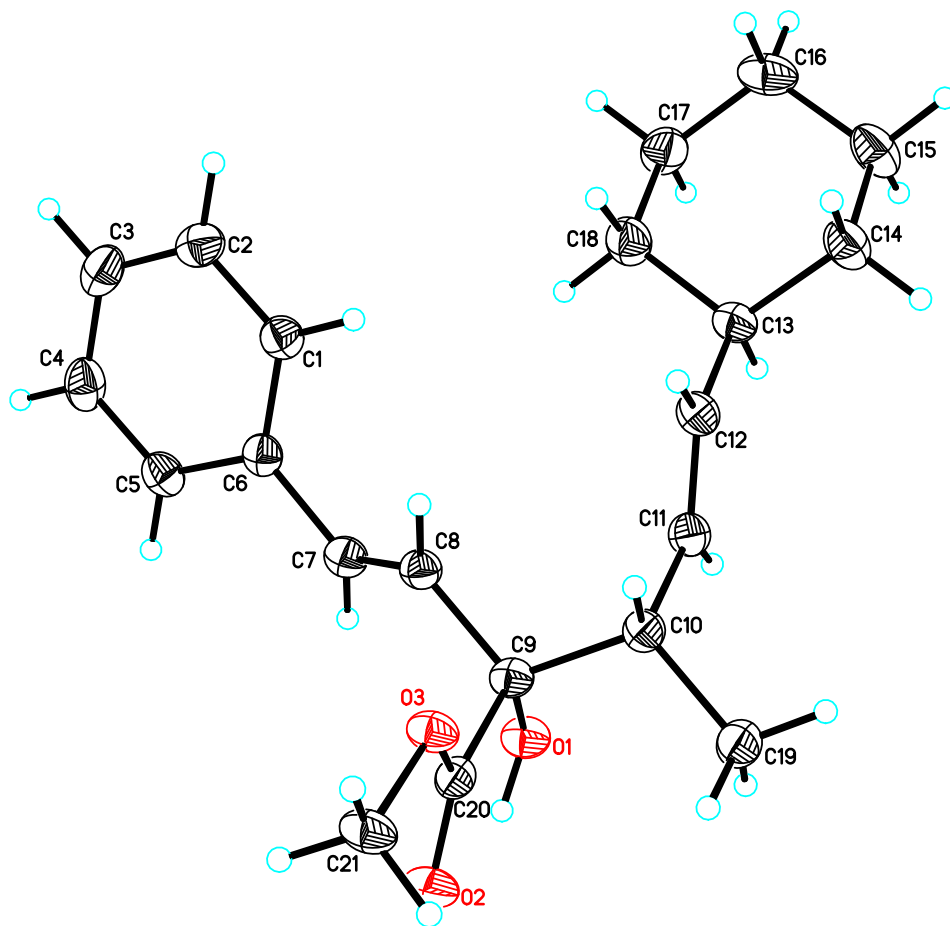

Table 1. Crystal data and structure refinement for *epi-7j*.

|                      |                                                |          |
|----------------------|------------------------------------------------|----------|
| Identification code  | <i>epi-7j</i>                                  |          |
| Empirical formula    | C <sub>21</sub> H <sub>28</sub> O <sub>3</sub> |          |
| Formula weight       | 328.43                                         |          |
| Temperature          | 173(2) K                                       |          |
| Wavelength           | 1.54178 Å                                      |          |
| Crystal system       | Orthorhombic                                   |          |
| Space group          | P2(1)2(1)2(1)                                  |          |
| Unit cell dimensions | a = 5.4496(4) Å                                | α = 90°. |
|                      | b = 13.7116(8) Å                               | β = 90°. |
|                      | c = 25.4795(15) Å                              | γ = 90°. |

|                                   |                                             |
|-----------------------------------|---------------------------------------------|
| Volume                            | 1903.9(2) Å <sup>3</sup>                    |
| Z                                 | 4                                           |
| Density (calculated)              | 1.146 Mg/m <sup>3</sup>                     |
| Absorption coefficient            | 0.592 mm <sup>-1</sup>                      |
| F(000)                            | 712                                         |
| Crystal size                      | 0.41 x 0.09 x 0.07 mm <sup>3</sup>          |
| Theta range for data collection   | 3.47 to 65.51°.                             |
| Index ranges                      | -6<=h<=4, -16<=k<=16, -29<=l<=30            |
| Reflections collected             | 16001                                       |
| Independent reflections           | 3218 [R(int) = 0.0341]                      |
| Completeness to theta = 65.51°    | 99.6 %                                      |
| Absorption correction             | Semi-empirical from equivalents             |
| Refinement method                 | Full-matrix least-squares on F <sup>2</sup> |
| Data / restraints / parameters    | 3218 / 0 / 218                              |
| Goodness-of-fit on F <sup>2</sup> | 1.176                                       |
| Final R indices [I>2sigma(I)]     | R1 = 0.0356, wR2 = 0.0832                   |
| R indices (all data)              | R1 = 0.0527, wR2 = 0.0970                   |
| Absolute structure parameter      | 0.1(3)                                      |
| Extinction coefficient            | 0.0037(4)                                   |
| Largest diff. peak and hole       | 0.176 and -0.195 e.Å <sup>-3</sup>          |

Table 2. Atomic coordinates ( $\times 10^4$ ) and equivalent isotropic displacement parameters ( $\text{\AA}^2 \times 10^3$ ) for *epi-7j*.  $U(\text{eq})$  is defined as one third of the trace of the orthogonalized  $U_{ij}$  tensor.

|       | x        | y       | z        | $U(\text{eq})$ |
|-------|----------|---------|----------|----------------|
| C(1)  | 8707(4)  | 4366(2) | 9942(1)  | 39(1)          |
| C(2)  | 9687(5)  | 4390(2) | 10444(1) | 45(1)          |
| C(3)  | 8532(5)  | 3911(2) | 10849(1) | 50(1)          |
| C(4)  | 6391(5)  | 3402(2) | 10756(1) | 48(1)          |
| C(5)  | 5397(4)  | 3381(2) | 10258(1) | 40(1)          |
| C(6)  | 6552(4)  | 3852(1) | 9840(1)  | 34(1)          |
| C(7)  | 5471(4)  | 3795(1) | 9311(1)  | 37(1)          |
| C(8)  | 6693(4)  | 3878(1) | 8867(1)  | 34(1)          |
| C(9)  | 5552(4)  | 3836(1) | 8328(1)  | 32(1)          |
| C(10) | 6691(4)  | 4619(1) | 7963(1)  | 35(1)          |
| C(11) | 6344(4)  | 5612(1) | 8204(1)  | 37(1)          |
| C(12) | 8112(4)  | 6139(1) | 8411(1)  | 37(1)          |
| C(13) | 7841(4)  | 7110(1) | 8676(1)  | 38(1)          |
| C(14) | 9447(5)  | 7891(2) | 8415(1)  | 50(1)          |
| C(15) | 9342(5)  | 8861(2) | 8704(1)  | 56(1)          |
| C(16) | 10009(5) | 8744(2) | 9277(1)  | 55(1)          |
| C(17) | 8346(5)  | 8008(2) | 9538(1)  | 52(1)          |
| C(18) | 8466(5)  | 7028(2) | 9258(1)  | 49(1)          |
| C(19) | 5614(4)  | 4556(2) | 7408(1)  | 45(1)          |
| C(20) | 5968(4)  | 2821(1) | 8100(1)  | 33(1)          |
| C(21) | 8802(4)  | 1616(1) | 7852(1)  | 42(1)          |
| O(1)  | 2969(3)  | 3980(1) | 8360(1)  | 40(1)          |
| O(2)  | 4317(3)  | 2279(1) | 7980(1)  | 45(1)          |
| O(3)  | 8343(3)  | 2590(1) | 8052(1)  | 36(1)          |

Table 3. Bond lengths [Å] and angles [°] for *epi-7j*.

---

|              |          |
|--------------|----------|
| C(1)-C(2)    | 1.387(3) |
| C(1)-C(6)    | 1.393(3) |
| C(1)-H(1A)   | 0.9500   |
| C(2)-C(3)    | 1.376(3) |
| C(2)-H(2A)   | 0.9500   |
| C(3)-C(4)    | 1.380(3) |
| C(3)-H(3A)   | 0.9500   |
| C(4)-C(5)    | 1.379(3) |
| C(4)-H(4A)   | 0.9500   |
| C(5)-C(6)    | 1.395(3) |
| C(5)-H(5A)   | 0.9500   |
| C(6)-C(7)    | 1.473(2) |
| C(7)-C(8)    | 1.318(3) |
| C(7)-H(7A)   | 0.9500   |
| C(8)-C(9)    | 1.510(2) |
| C(8)-H(8A)   | 0.9500   |
| C(9)-O(1)    | 1.424(2) |
| C(9)-C(20)   | 1.525(3) |
| C(9)-C(10)   | 1.549(3) |
| C(10)-C(11)  | 1.506(3) |
| C(10)-C(19)  | 1.533(3) |
| C(10)-H(10A) | 1.0000   |
| C(11)-C(12)  | 1.315(3) |
| C(11)-H(11A) | 0.9500   |
| C(12)-C(13)  | 1.500(3) |
| C(12)-H(12A) | 0.9500   |
| C(13)-C(18)  | 1.527(3) |
| C(13)-C(14)  | 1.534(3) |
| C(13)-H(13A) | 1.0000   |
| C(14)-C(15)  | 1.522(3) |
| C(14)-H(14A) | 0.9900   |
| C(14)-H(14B) | 0.9900   |
| C(15)-C(16)  | 1.512(3) |
| C(15)-H(15A) | 0.9900   |

|                 |            |
|-----------------|------------|
| C(15)-H(15B)    | 0.9900     |
| C(16)-C(17)     | 1.511(3)   |
| C(16)-H(16A)    | 0.9900     |
| C(16)-H(16B)    | 0.9900     |
| C(17)-C(18)     | 1.523(3)   |
| C(17)-H(17A)    | 0.9900     |
| C(17)-H(17B)    | 0.9900     |
| C(18)-H(18A)    | 0.9900     |
| C(18)-H(18B)    | 0.9900     |
| C(19)-H(19A)    | 0.9800     |
| C(19)-H(19B)    | 0.9800     |
| C(19)-H(19C)    | 0.9800     |
| C(20)-O(2)      | 1.207(2)   |
| C(20)-O(3)      | 1.338(2)   |
| C(21)-O(3)      | 1.451(2)   |
| C(21)-H(21A)    | 0.9800     |
| C(21)-H(21B)    | 0.9800     |
| C(21)-H(21C)    | 0.9800     |
| O(1)-H(1B)      | 0.8400     |
|                 |            |
| C(2)-C(1)-C(6)  | 120.52(19) |
| C(2)-C(1)-H(1A) | 119.7      |
| C(6)-C(1)-H(1A) | 119.7      |
| C(3)-C(2)-C(1)  | 120.3(2)   |
| C(3)-C(2)-H(2A) | 119.9      |
| C(1)-C(2)-H(2A) | 119.9      |
| C(2)-C(3)-C(4)  | 119.93(19) |
| C(2)-C(3)-H(3A) | 120.0      |
| C(4)-C(3)-H(3A) | 120.0      |
| C(5)-C(4)-C(3)  | 120.1(2)   |
| C(5)-C(4)-H(4A) | 120.0      |
| C(3)-C(4)-H(4A) | 120.0      |
| C(4)-C(5)-C(6)  | 121.0(2)   |
| C(4)-C(5)-H(5A) | 119.5      |
| C(6)-C(5)-H(5A) | 119.5      |
| C(1)-C(6)-C(5)  | 118.22(17) |

|                    |            |
|--------------------|------------|
| C(1)-C(6)-C(7)     | 122.28(17) |
| C(5)-C(6)-C(7)     | 119.50(19) |
| C(8)-C(7)-C(6)     | 125.4(2)   |
| C(8)-C(7)-H(7A)    | 117.3      |
| C(6)-C(7)-H(7A)    | 117.3      |
| C(7)-C(8)-C(9)     | 124.8(2)   |
| C(7)-C(8)-H(8A)    | 117.6      |
| C(9)-C(8)-H(8A)    | 117.6      |
| O(1)-C(9)-C(8)     | 110.42(16) |
| O(1)-C(9)-C(20)    | 107.19(16) |
| C(8)-C(9)-C(20)    | 108.66(15) |
| O(1)-C(9)-C(10)    | 109.60(16) |
| C(8)-C(9)-C(10)    | 110.78(16) |
| C(20)-C(9)-C(10)   | 110.11(15) |
| C(11)-C(10)-C(19)  | 112.23(16) |
| C(11)-C(10)-C(9)   | 109.36(15) |
| C(19)-C(10)-C(9)   | 111.16(17) |
| C(11)-C(10)-H(10A) | 108.0      |
| C(19)-C(10)-H(10A) | 108.0      |
| C(9)-C(10)-H(10A)  | 108.0      |
| C(12)-C(11)-C(10)  | 124.7(2)   |
| C(12)-C(11)-H(11A) | 117.7      |
| C(10)-C(11)-H(11A) | 117.7      |
| C(11)-C(12)-C(13)  | 126.6(2)   |
| C(11)-C(12)-H(12A) | 116.7      |
| C(13)-C(12)-H(12A) | 116.7      |
| C(12)-C(13)-C(18)  | 110.45(16) |
| C(12)-C(13)-C(14)  | 111.61(17) |
| C(18)-C(13)-C(14)  | 110.21(19) |
| C(12)-C(13)-H(13A) | 108.2      |
| C(18)-C(13)-H(13A) | 108.2      |
| C(14)-C(13)-H(13A) | 108.2      |
| C(15)-C(14)-C(13)  | 112.27(18) |
| C(15)-C(14)-H(14A) | 109.2      |
| C(13)-C(14)-H(14A) | 109.2      |
| C(15)-C(14)-H(14B) | 109.2      |

|                     |            |
|---------------------|------------|
| C(13)-C(14)-H(14B)  | 109.2      |
| H(14A)-C(14)-H(14B) | 107.9      |
| C(16)-C(15)-C(14)   | 111.4(2)   |
| C(16)-C(15)-H(15A)  | 109.3      |
| C(14)-C(15)-H(15A)  | 109.3      |
| C(16)-C(15)-H(15B)  | 109.3      |
| C(14)-C(15)-H(15B)  | 109.3      |
| H(15A)-C(15)-H(15B) | 108.0      |
| C(17)-C(16)-C(15)   | 110.6(2)   |
| C(17)-C(16)-H(16A)  | 109.5      |
| C(15)-C(16)-H(16A)  | 109.5      |
| C(17)-C(16)-H(16B)  | 109.5      |
| C(15)-C(16)-H(16B)  | 109.5      |
| H(16A)-C(16)-H(16B) | 108.1      |
| C(16)-C(17)-C(18)   | 110.97(19) |
| C(16)-C(17)-H(17A)  | 109.4      |
| C(18)-C(17)-H(17A)  | 109.4      |
| C(16)-C(17)-H(17B)  | 109.4      |
| C(18)-C(17)-H(17B)  | 109.4      |
| H(17A)-C(17)-H(17B) | 108.0      |
| C(17)-C(18)-C(13)   | 112.35(17) |
| C(17)-C(18)-H(18A)  | 109.1      |
| C(13)-C(18)-H(18A)  | 109.1      |
| C(17)-C(18)-H(18B)  | 109.1      |
| C(13)-C(18)-H(18B)  | 109.1      |
| H(18A)-C(18)-H(18B) | 107.9      |
| C(10)-C(19)-H(19A)  | 109.5      |
| C(10)-C(19)-H(19B)  | 109.5      |
| H(19A)-C(19)-H(19B) | 109.5      |
| C(10)-C(19)-H(19C)  | 109.5      |
| H(19A)-C(19)-H(19C) | 109.5      |
| H(19B)-C(19)-H(19C) | 109.5      |
| O(2)-C(20)-O(3)     | 123.51(18) |
| O(2)-C(20)-C(9)     | 123.23(19) |
| O(3)-C(20)-C(9)     | 113.26(17) |
| O(3)-C(21)-H(21A)   | 109.5      |

|                     |            |
|---------------------|------------|
| O(3)-C(21)-H(21B)   | 109.5      |
| H(21A)-C(21)-H(21B) | 109.5      |
| O(3)-C(21)-H(21C)   | 109.5      |
| H(21A)-C(21)-H(21C) | 109.5      |
| H(21B)-C(21)-H(21C) | 109.5      |
| C(9)-O(1)-H(1B)     | 109.5      |
| C(20)-O(3)-C(21)    | 114.62(16) |

---

Symmetry transformations used to generate equivalent atoms:



Table 4. Anisotropic displacement parameters ( $\text{\AA}^2 \times 10^3$ ) for *epi-7j*. The anisotropic displacement factor exponent takes the form:  $-2\pi^2 [ h^2 a^{*2} U^{11} + \dots + 2 h k a^* b^* U^{12} ]$

|       | U11   | U22   | U33   | U23    | U13   | U12   |
|-------|-------|-------|-------|--------|-------|-------|
| C(1)  | 42(2) | 37(1) | 38(1) | -2(1)  | 2(1)  | 0(1)  |
| C(2)  | 42(2) | 44(1) | 49(1) | -8(1)  | -7(1) | 6(1)  |
| C(3)  | 64(2) | 48(1) | 37(1) | -3(1)  | -8(1) | 16(1) |
| C(4)  | 68(2) | 42(1) | 35(1) | 3(1)   | 10(1) | 8(1)  |
| C(5)  | 45(2) | 34(1) | 41(1) | -2(1)  | 8(1)  | -1(1) |
| C(6)  | 39(1) | 29(1) | 34(1) | -3(1)  | 3(1)  | 6(1)  |
| C(7)  | 35(1) | 34(1) | 40(1) | -3(1)  | 1(1)  | 1(1)  |
| C(8)  | 33(1) | 31(1) | 37(1) | -2(1)  | -3(1) | 1(1)  |
| C(9)  | 24(1) | 34(1) | 38(1) | -3(1)  | -2(1) | 2(1)  |
| C(10) | 37(1) | 32(1) | 35(1) | -1(1)  | -1(1) | 3(1)  |
| C(11) | 38(1) | 33(1) | 39(1) | 0(1)   | -1(1) | 3(1)  |
| C(12) | 38(1) | 32(1) | 41(1) | -1(1)  | 3(1)  | 2(1)  |
| C(13) | 38(1) | 33(1) | 44(1) | -3(1)  | -1(1) | -2(1) |
| C(14) | 61(2) | 36(1) | 52(1) | -1(1)  | 8(1)  | -6(1) |
| C(15) | 69(2) | 35(1) | 63(1) | -4(1)  | 16(1) | -7(1) |
| C(16) | 48(2) | 44(1) | 73(2) | -21(1) | -5(1) | -1(1) |
| C(17) | 67(2) | 44(1) | 44(1) | -7(1)  | -5(1) | 4(1)  |
| C(18) | 63(2) | 39(1) | 46(1) | -3(1)  | 2(1)  | 0(1)  |
| C(19) | 57(2) | 40(1) | 38(1) | 0(1)   | -4(1) | 2(1)  |
| C(20) | 35(1) | 36(1) | 29(1) | 2(1)   | -2(1) | 0(1)  |
| C(21) | 43(2) | 31(1) | 52(1) | -13(1) | -1(1) | 1(1)  |
| O(1)  | 30(1) | 41(1) | 49(1) | -6(1)  | -2(1) | 3(1)  |
| O(2)  | 38(1) | 40(1) | 58(1) | -10(1) | -4(1) | -8(1) |
| O(3)  | 30(1) | 31(1) | 46(1) | -9(1)  | -1(1) | 1(1)  |

Table 5. Hydrogen coordinates ( $\times 10^4$ ) and isotropic displacement parameters ( $\text{\AA}^2 \times 10^{-3}$ ) for *epi-7j*.

|        | x     | y    | z     | U(eq) |
|--------|-------|------|-------|-------|
| H(1A)  | 9510  | 4702 | 9665  | 47    |
| H(2A)  | 11162 | 4739 | 10508 | 54    |
| H(3A)  | 9208  | 3931 | 11192 | 60    |
| H(4A)  | 5601  | 3066 | 11034 | 58    |
| H(5A)  | 3903  | 3041 | 10199 | 48    |
| H(7A)  | 3752  | 3688 | 9288  | 44    |
| H(8A)  | 8417  | 3972 | 8888  | 40    |
| H(10A) | 8494  | 4490 | 7938  | 41    |
| H(11A) | 4734  | 5877 | 8206  | 44    |
| H(12A) | 9725  | 5878 | 8391  | 44    |
| H(13A) | 6088  | 7318 | 8645  | 46    |
| H(14A) | 11168 | 7660 | 8405  | 59    |
| H(14B) | 8894  | 7987 | 8049  | 59    |
| H(15A) | 10492 | 9326 | 8537  | 67    |
| H(15B) | 7666  | 9135 | 8676  | 67    |
| H(16A) | 11735 | 8526 | 9307  | 66    |
| H(16B) | 9856  | 9381 | 9457  | 66    |
| H(17A) | 6637  | 8252 | 9534  | 62    |
| H(17B) | 8846  | 7924 | 9909  | 62    |
| H(18A) | 7304  | 6570 | 9428  | 59    |
| H(18B) | 10138 | 6754 | 9296  | 59    |
| H(19A) | 6367  | 5056 | 7186  | 68    |
| H(19B) | 3837  | 4662 | 7423  | 68    |
| H(19C) | 5949  | 3910 | 7260  | 68    |
| H(21A) | 10575 | 1507 | 7827  | 63    |
| H(21B) | 8058  | 1548 | 7504  | 63    |
| H(21C) | 8081  | 1135 | 8092  | 63    |
| H(1B)  | 2243  | 3481 | 8249  | 60    |

Table 6. Torsion angles [°] for *epi-7j*.

|                         |             |
|-------------------------|-------------|
| C(6)-C(1)-C(2)-C(3)     | -0.4(3)     |
| C(1)-C(2)-C(3)-C(4)     | 0.1(3)      |
| C(2)-C(3)-C(4)-C(5)     | -0.6(3)     |
| C(3)-C(4)-C(5)-C(6)     | 1.4(3)      |
| C(2)-C(1)-C(6)-C(5)     | 1.1(3)      |
| C(2)-C(1)-C(6)-C(7)     | -179.01(18) |
| C(4)-C(5)-C(6)-C(1)     | -1.6(3)     |
| C(4)-C(5)-C(6)-C(7)     | 178.51(19)  |
| C(1)-C(6)-C(7)-C(8)     | 26.0(3)     |
| C(5)-C(6)-C(7)-C(8)     | -154.1(2)   |
| C(6)-C(7)-C(8)-C(9)     | -178.80(18) |
| C(7)-C(8)-C(9)-O(1)     | 16.9(3)     |
| C(7)-C(8)-C(9)-C(20)    | -100.4(2)   |
| C(7)-C(8)-C(9)-C(10)    | 138.6(2)    |
| O(1)-C(9)-C(10)-C(11)   | 64.4(2)     |
| C(8)-C(9)-C(10)-C(11)   | -57.7(2)    |
| C(20)-C(9)-C(10)-C(11)  | -177.93(17) |
| O(1)-C(9)-C(10)-C(19)   | -60.1(2)    |
| C(8)-C(9)-C(10)-C(19)   | 177.83(16)  |
| C(20)-C(9)-C(10)-C(19)  | 57.6(2)     |
| C(19)-C(10)-C(11)-C(12) | -127.8(2)   |
| C(9)-C(10)-C(11)-C(12)  | 108.4(2)    |
| C(10)-C(11)-C(12)-C(13) | -177.13(17) |
| C(11)-C(12)-C(13)-C(18) | 113.9(2)    |
| C(11)-C(12)-C(13)-C(14) | -123.1(2)   |
| C(12)-C(13)-C(14)-C(15) | -175.66(19) |
| C(18)-C(13)-C(14)-C(15) | -52.5(3)    |
| C(13)-C(14)-C(15)-C(16) | 55.1(3)     |
| C(14)-C(15)-C(16)-C(17) | -56.8(3)    |
| C(15)-C(16)-C(17)-C(18) | 57.2(3)     |
| C(16)-C(17)-C(18)-C(13) | -56.2(3)    |
| C(12)-C(13)-C(18)-C(17) | 177.0(2)    |
| C(14)-C(13)-C(18)-C(17) | 53.2(3)     |
| O(1)-C(9)-C(20)-O(2)    | -0.2(2)     |

|                       |             |
|-----------------------|-------------|
| C(8)-C(9)-C(20)-O(2)  | 119.2(2)    |
| C(10)-C(9)-C(20)-O(2) | -119.3(2)   |
| O(1)-C(9)-C(20)-O(3)  | -179.55(15) |
| C(8)-C(9)-C(20)-O(3)  | -60.2(2)    |
| C(10)-C(9)-C(20)-O(3) | 61.3(2)     |
| O(2)-C(20)-O(3)-C(21) | -1.4(2)     |
| C(9)-C(20)-O(3)-C(21) | 178.03(14)  |

---

Symmetry transformations used to generate equivalent atoms:

Table 7. Hydrogen bonds for *epi-7j* [ $\text{\AA}$  and  $^\circ$ ].

| D-H...A             | d(D-H) | d(H...A) | d(D...A)   | $\angle(\text{DHA})$ |
|---------------------|--------|----------|------------|----------------------|
| O(1)-H(1B)...O(2)   | 0.84   | 2.11     | 2.6306(19) | 119.5                |
| O(1)-H(1B)...O(3)#1 | 0.84   | 2.50     | 3.2562(19) | 150.0                |

Symmetry transformations used to generate equivalent atoms:

#1 x-1,y,z
